# Supplementary material for: Phosphoproteomic Profiling Identifies Aberrant Activation of Integrin Signaling in Aggressive Non-Type Bladder Carcinoma
Source: MDPI journal article supplement (doi:10.3390/jcm8050703), 2019-05-17
Supplement: s1 [file s1]

**Phosphoproteomic profiling identifies aberrant activation of integrin signaling in aggressive non-type bladder carcinoma**

Barnali Deb, Vinuth N. Puttamalles, Kirti Gondkar, Jean Paul Thiery, Harsha Gowda, Prashant Kumar

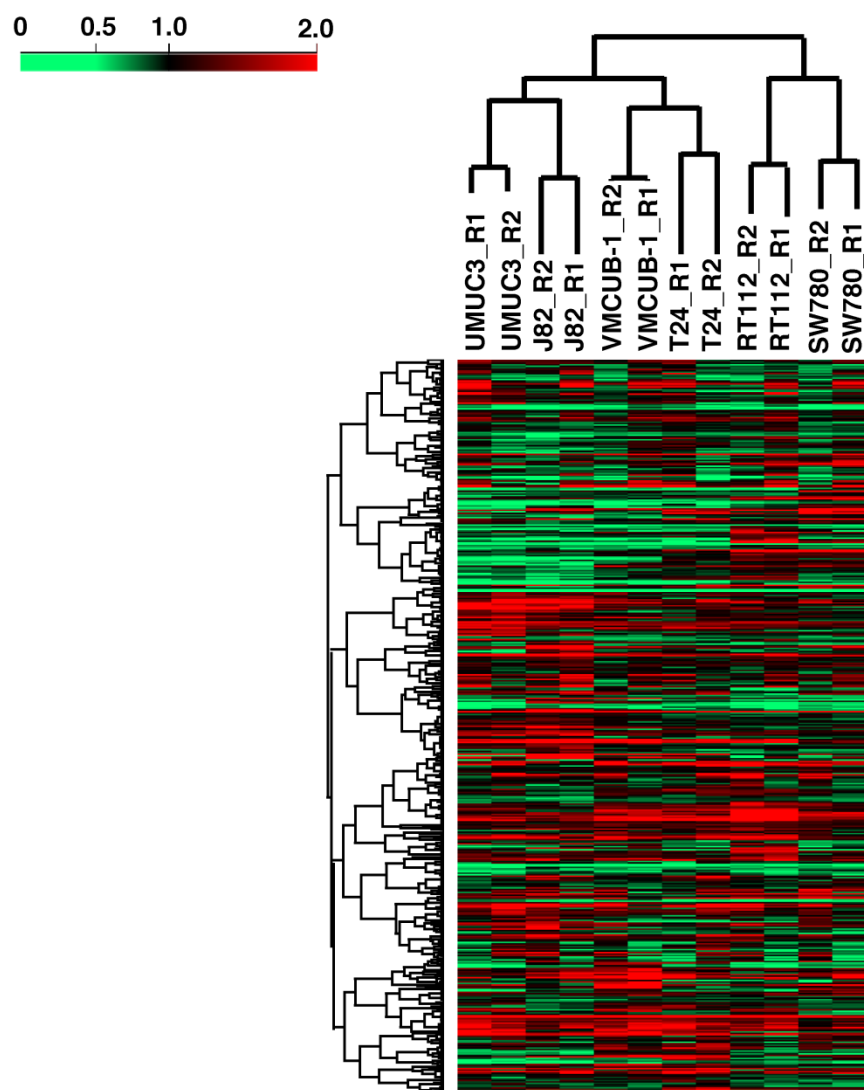

**Supplementary Figure S1.** Unsupervised clustering of the bladder carcinoma cell lines of the quantified data across all the cell lines.

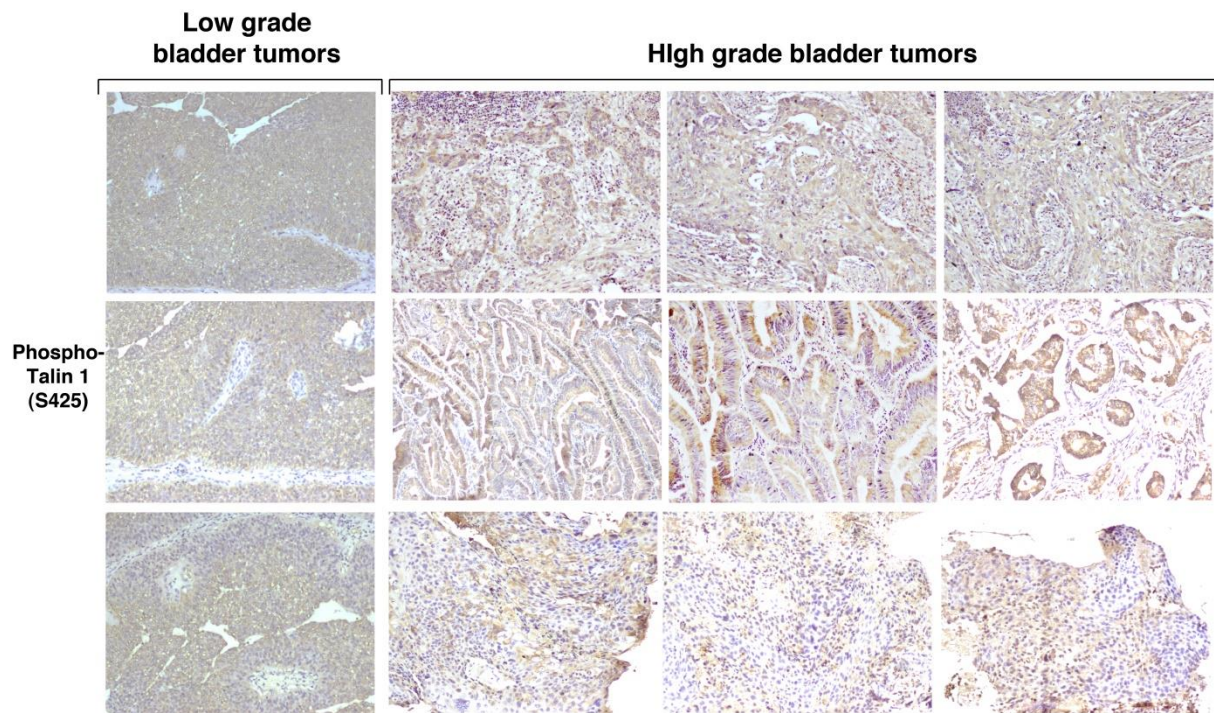

**Supplementary Figure S2.** Immunohistochemistry showing TLN1 (S425) hyperphosphorylation in high-grade tumors as compared to low-grade tumors.

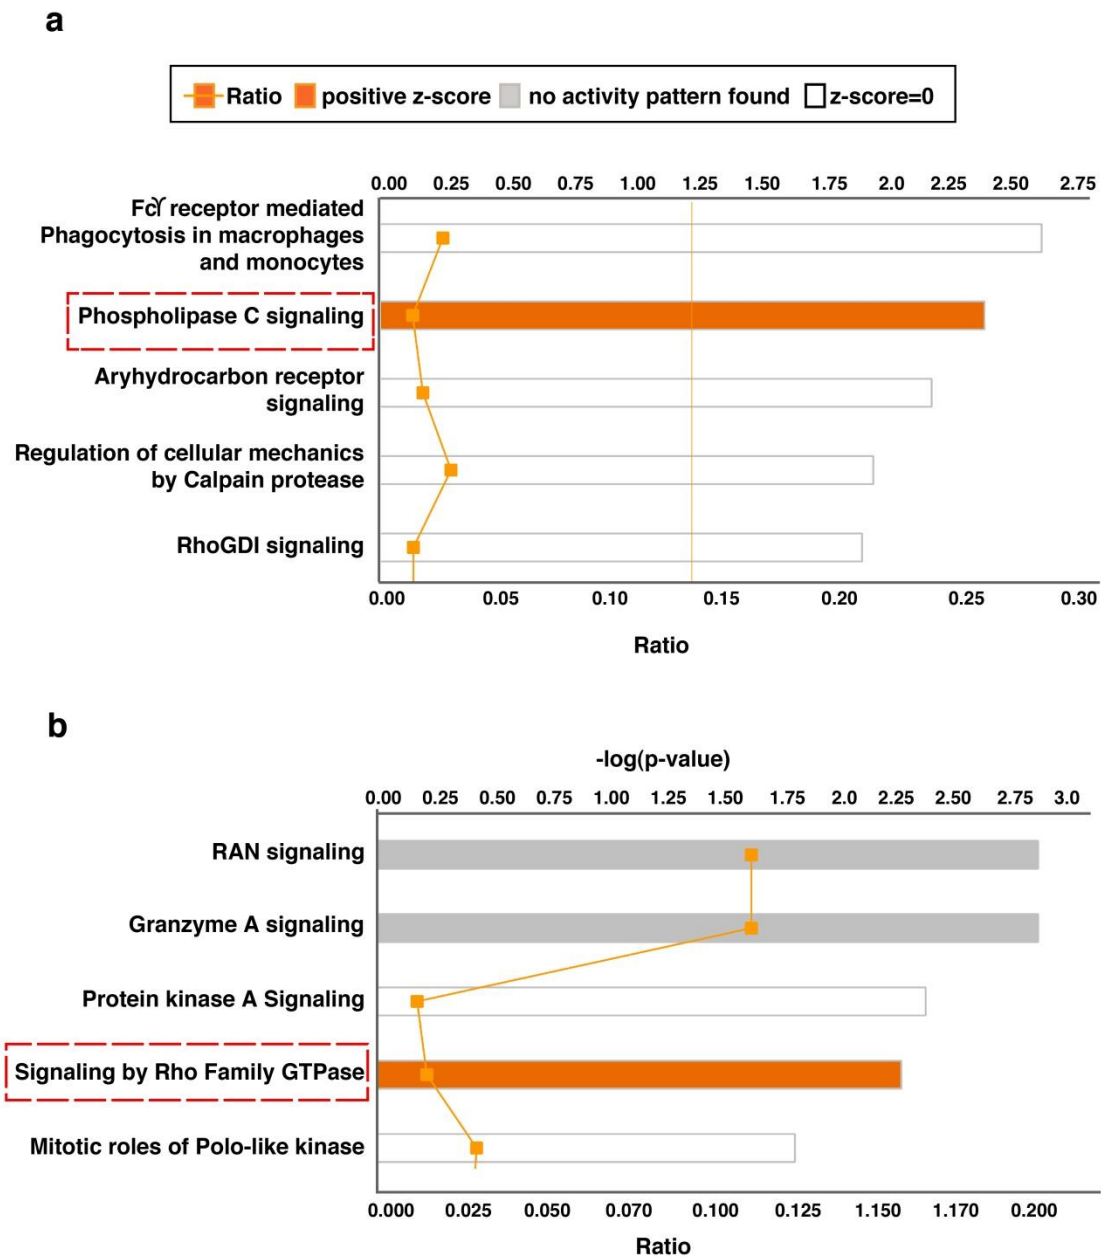

**Supplementary Figure S3.** Top five canonical pathways enriched by IPA in (a) luminal and (b) basal subtypes of bladder carcinoma.

a

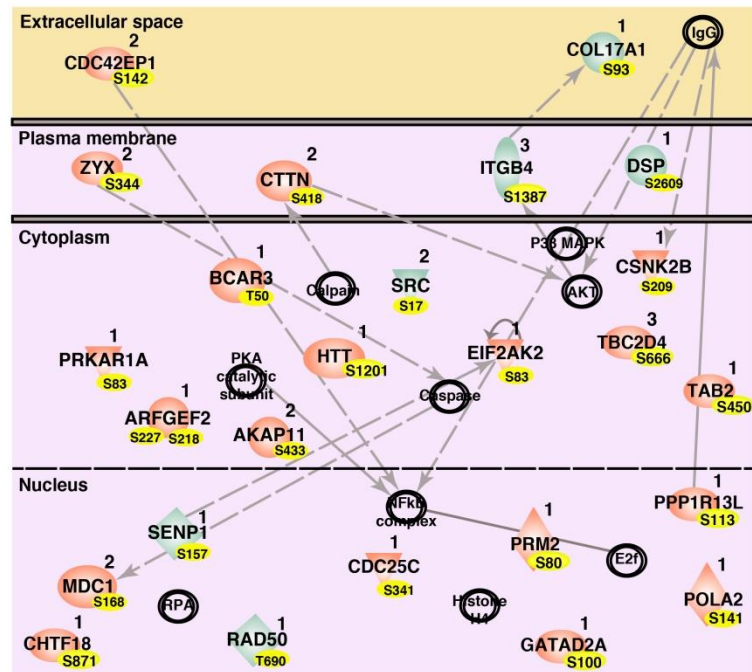

b

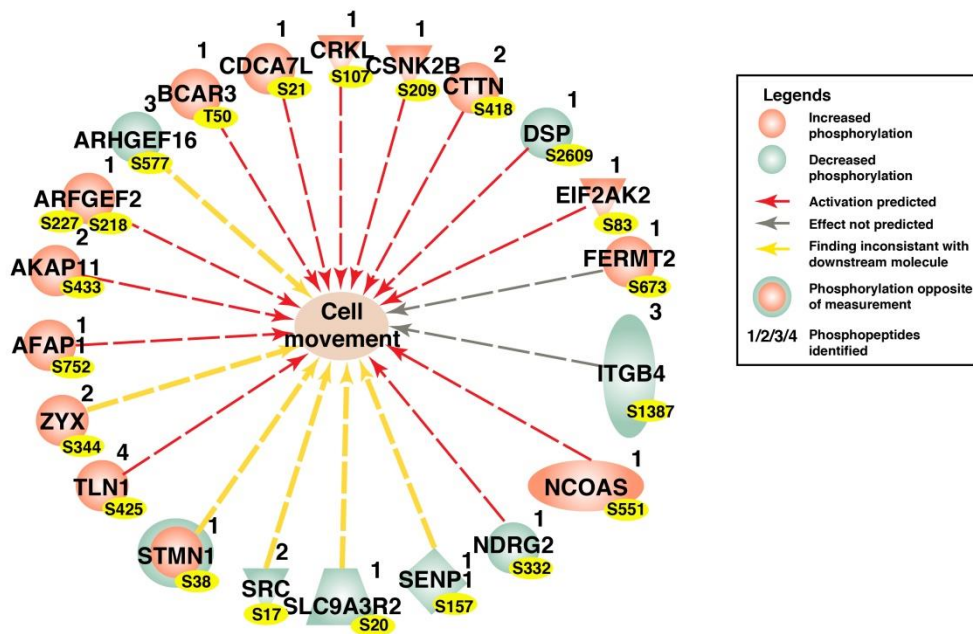

**Supplementary Figure S4.** (a) A global network interaction map of the differentially phosphorylated proteins in non-type subtype. Most enriched network in the aggressive subtype with an enrichment score of 46 (IPA). (b) Cell motility is an intrinsic characteristic of the non-type subtype of bladder carcinoma. Phosphoproteins involved in cell motility, as depicted from the IPA analysis.

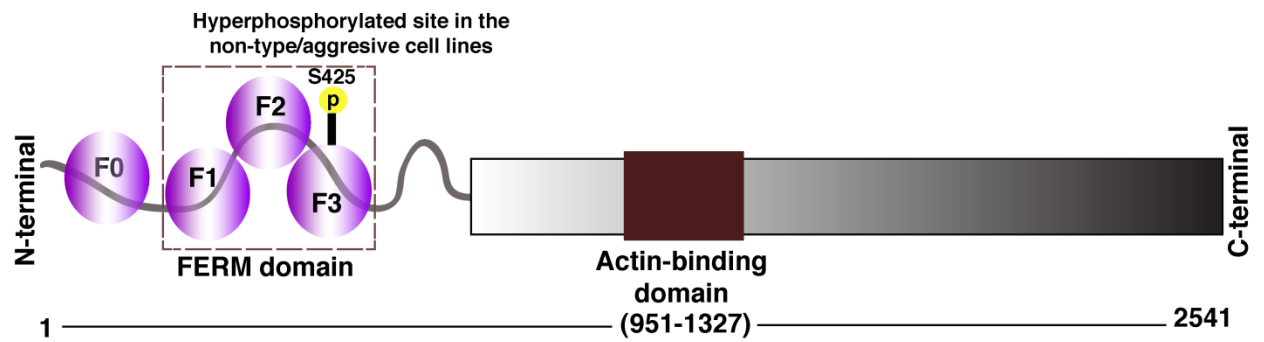

**Supplementary Figure S5.** Protein domain structure for TLN1. The domains of TLN1 and the significantly differentially phosphorylated sites (S425; head domain) in the non-type cell lines.

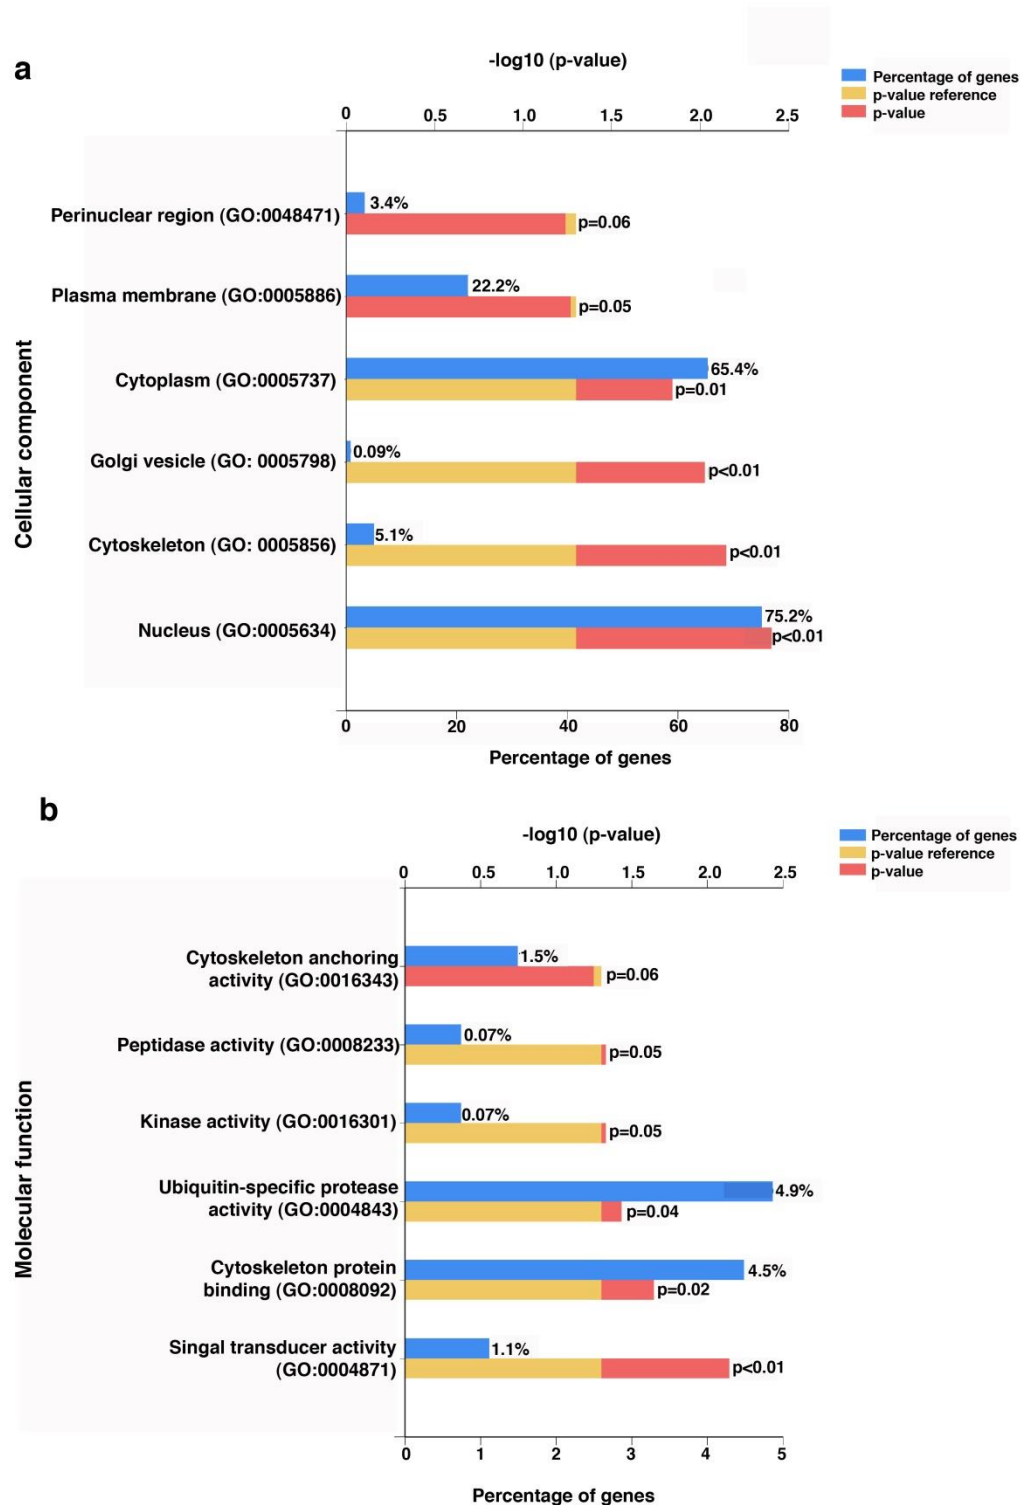

**Supplementary Figure S6.** Gene ontology enrichment of the differentially phosphorylated proteins in the non-type molecular subtype. Most of the proteins are nuclear proteins (75.2%). Proteins with kinase activity and signal transducer activity are also significantly enriched ( $p \leq 0.05$ ). Data were analysed using FunRich.
