# Supplementary material for: Phosphoproteomic Profiling Identifies Aberrant Activation of Integrin Signaling in Aggressive Non-Type Bladder Carcinoma
Source: J Clin Med. 2019 May 17;8(5):703. doi: 10.3390/jcm8050703 (PMC6572125; doi:10.3390/jcm8050703)
Supplement: Supplementary file 1 [file jcm-08-00703-s001.zip › Supplementary tables_041719_JCM.xlsx]

## Sheet: S1
Supplementary table S1 : EMT score of bladder carcinoma molecular subtypes
Deb et al., 2019. Phosphoproteomic profiling identifies aberrant activation of integrin signaling in aggressive non-type bladder carcinoma
Molecular subtype	Cell line	p-value	Ksscore	EGFR Mutation
Luminal	RT112	4.92e-14	-0.622	WT
	SW780	2.17e-17	-0.696	WT
Basal	VMCUB-1	0.000545	-0.308	WT
Non-type	J82	7.66e-10	0.514	WT
	UMUC3	1.1e-15	0.659	WT
	T24	4.24e-05	0.356	WT

## Sheet: S2
Supplementary table S2 : List of phosphopeptides identified in bladder carcinoma cell lines using SequestHT and Mascot search algorithms
Deb et al., 2019. Phosphoproteomic profiling identifies aberrant activation of integrin signaling in aggressive non-type bladder carcinoma
Gene Symbol	Gene ID	Protein Description	Phospho Site (Protein)	Sequence	Master Protein Accessions	Modifications	Modifications in Master Proteins	Qvality PEP	Qvality q-value	# Protein Groups	# Proteins	# PSMs	Protein Accessions	Positions in Master Proteins	# Missed Cleavages	Theo. MH+ [Da]	PhosphoRS: Best Site Probabilities	UMUC3/BTERT_Rep1	J82/BTERT_Rep1	VMCUB-1/BTERT_Rep1	SW780/BTERT_Rep1	RT112/BTERT_Rep1	T24/BTERT_Rep1	UMUC3/BTERT_Rep2	J82/BTERT_Rep2	VMCUB-1/BTERT_Rep2	SW780/BTERT_Rep2	RT112/BTERT_Rep2	T24/BTERT_Rep2	XCorr Sequest HT	Confidence Sequest HT	Percolator q-Value Sequest HT	Percolator PEP Sequest HT	Ions Score Mascot	Confidence Mascot	Percolator q-Value Mascot	Percolator PEP Mascot	PhosphoRS: Best Site Probabilities	Phospho Site (Peptide)	Protein Group Accession	NP_Accession	Phospho window	PhosphositePlus Evidence
KDM3B	51780	lysine-specific demethylase 3B [Homo sapiens]	S725; S730	sSSPTsSLTQPIEMPTLSSSPTEERPTVGPGQQDNPLLK	38372909	2×TMT6plex [N-Term; K39]; 2×Phospho [S1(93.1); T5(96.1)]	38372909 2×Phospho [S725(93.1); T729(96.1)]	0.00353854	0.000383028	1	1	4	38372909	38372909 [725-763]	0	4712.28	S1(Phospho): 91.28; S6(Phospho): 91.26	5.71	2.23	4.21	3.26	4.12	3.8	2.81	3.22	2.47	1.33	2	1.14	4.79239	High	0.0001218	0.0006426					S1(Phospho): 91.28; S6(Phospho): 91.26	S1; S6;	38372909	NP_057688.2	SAMGNGRsSSPTSSL;GRSSSPTsSLTQPIE	Yes;Yes
DNAJA1	3301	dnaJ homolog subfamily A member 1 [Homo sapiens]	S335	VNFPENGFLsPDKLSLLEK	4504511	3×TMT6plex [N-Term; K13; K19]; 1×Deamidated [N6]; 1×Phospho [S10(100)]	4504511 1×Phospho [S335(100)]	0.00042035	0.000193352	1	1	15	4504511	4504511 [326-344]	1	2915.58	S10(Phospho): 100	3.77	2.38	3.08	2.4	2.55	3.16	2.48	2.01	2.45	1.76	1.95	2.55	4.77344	High	3.79e-05	0.0001223	23.81	High	0.0003738	1	S10(Phospho): 100	S10;	4504511	NP_001530.1	FPENGFLsPDKLSLL	Yes
MKI67	4288	antigen KI-67 isoform 1 [Homo sapiens]	S1937	LDLLGNLPGsKR	103472005	2×TMT6plex [N-Term; K11]; 1×Phospho [S10(100)]	103472005 1×Phospho [S1937(100)]; 1×Phospho [S4347(100)]	0.0126975	0.000778694	1	2	5	103472005; 225543215	103472005 [1928-1939]; [2411-2422]	1	1821.04	S10(Phospho): 100	3.47	8.1	12.87	3.69	6.68	6.21	1.09	2.11	4.01	0.97	2.05	1.48	2.80997	High	0.0002091	0.002094	12.67	High	0.002806	1	S10(Phospho): 100	S10;	103472005	NP_002408.3	LLGNLPGsKRRPQTP	Yes
NAV2	89797	neuron navigator 2 isoform 5 [Homo sapiens]	S481	MLTTVGPASSsPK	350276222	2×TMT6plex [N-Term; K13]; 1×Phospho [S11(100)]	350276222 1×Phospho [S481(100)]	0.000239995	0.000147488	1	4	6	161169013; 350276222; 38044282; 161169015	350276222 [471-483]	0	1813.95	S11(Phospho): 100	2.71	2.77	2.49	2.25	2.55	2.51	1.74	1.94	1.56	2.42	2.24	2.19	3.64169	High	2.03e-05	9.38e-05	27.84	High	6.51e-05	1	S11(Phospho): 100	S11;	350276222	NP_001231892.1	TVGPASSsPKIALKG	Yes
AKIRIN2	55122	akirin-2 [Homo sapiens]	S21	TLDFDPLLSPAsPK	14149718	2×TMT6plex [N-Term; K14]; 1×Phospho [S12(100)]	14149718 1×Phospho [S21(100)]	0.000111322	9e-05	1	1	4	14149718	14149718 [10-23]	0	2039.09	S12(Phospho): 100	3.88	4.35	2.77	4.09	7.8	2.89	2.88	2.64	2.66	2.39	4.42	2.32	4.82386	High	2.03e-05	4.08e-05	38.03	High	7.92e-05	1	S12(Phospho): 100	S12;	14149718	NP_060534.1	DPLLSPAsPKRRRCA	Yes
HNRNPAB	3182	heterogeneous nuclear ribonucleoprotein A/B isoform b [Homo sapiens]	S255	GsGGGGGGGGQGSTNYGK	55956921	2×TMT6plex [N-Term; K18]; 1×Phospho [S2(100)]	55956921 1×Phospho [S255(100)]	0.00457655	0.000406702	1	1	2	55956921	55956921 [254-271]	0	1992.92	S2(Phospho): 100	3.84	2.99	3.64	2.22	4.54	2.17							2.24181	High	0.0001371	0.001088	23.26	High	0.0001662	1	S2(Phospho): 100	S2;	55956921	NP_004490.2	RNRGNRGsGGGGGGG	Yes
NUP50	10762	nuclear pore complex protein Nup50 isoform b [Homo sapiens]	S296	KVDSSVLGSLSSVPLTGFSFsPGNSSLFGK	24497451	3×TMT6plex [N-Term; K30; K]; 1×Phospho [S21(100)]	24497451 1×Phospho [S296(100)]	4.47e-05	6.55e-05	1	2	9	24497451; 24497447	24497451 [276-305]	1	3769.01	S21(Phospho): 99.96	2.8	2.88	2.58	2.85	2.35	3.06							7.00774	High	1.3e-05	1.95e-05	49.8	High	1.91e-05	1	S21(Phospho): 99.96	S21;	24497451	NP_009103.2	PLTGFSFsPGNSSLF	Yes
CCNB2	9133	G2/mitotic-specific cyclin-B2 [Homo sapiens]	S92	GPsPTPEDVSMKEENLCQAFSDALLCK	4757930	3×TMT6plex [N-Term; K12; K27]; 2×Carbamidomethyl [C17; C26]; 1×Phospho [S3(100)]	4757930 1×Phospho [S92(100)]	4.27e-05	6.55e-05	1	1	6	4757930	4757930 [90-116]	1	3790.83	S3(Phospho): 100	5.54	3.57	2.69	2.71	3.23	2.31							8.77819	High	0	1.32e-05	26.16	High	2.27e-05	1	S3(Phospho): 100	S3;	4757930	NP_004692.1	KLAPKGPsPTPEDVS	Yes
ARPP19	10776	cAMP-regulated phosphoprotein 19 isoform 2 [Homo sapiens]	S23	VTsPEKAEEAK	5729732	3×TMT6plex [N-Term; K6; K11]; 1×Phospho [S3(99.3)]	5729732 1×Phospho [S23(99.3)]	0.141186	0.00698991	1	2	10	807201093; 5729732	5729732 [21-31]	1	1956.07	S3(Phospho): 98.76	3.45	2.45	2.68	3.08	3.33	3.9	6.07	3.55	4.67	4.25	5.53	5.3	2.85023	High	0.002837	0.05558	19.86	High	0.001585	1	S3(Phospho): 98.76	S3;	5729732	NP_006619.1	EMEDKVTsPEKAEEA	Yes
BAZ1B	9031	tyrosine-protein kinase BAZ1B [Homo sapiens]	S349	SLSGsPLK	14670392	2×TMT6plex [N-Term; K8]; 1×Phospho [S5(100)]	14670392 1×Phospho [S349(100)]	0.0856468	0.00394964	1	1	9	14670392	14670392 [345-352]	0	1326.74	S5(Phospho): 100	4.04	2.28	3.61	2.4	3.17	3.01	1.73	1.19	1.35	1.27	1.49	1.12	3.5357	High	0.002133	0.04096	31.33	High	0.002303	1	S5(Phospho): 100	S5;	14670392	NP_115784.1	LKKSLSGsPLKVKNS	Yes
USP24	23358	ubiquitin carboxyl-terminal hydrolase 24 [Homo sapiens]	S1612	IILNSHsPAGSAAISQQDFHPK	260064009	2×TMT6plex [N-Term; K22]; 1×Phospho [S7(100)]	260064009 1×Phospho [S1612(100)]	4.27e-05	6.55e-05	1	1	6	260064009	260064009 [1606-1627]	0	2856.48	S7(Phospho): 99.99	3.64	3.8	2.77	2.51	2.3	2.4	3.43	3.07	2.95	2.5	2.45	2.31	7.61519	High	0	1.54e-05	22.65	High	2.27e-05	1	S7(Phospho): 99.99	S7;	260064009	NP_056121.2	RIILNSHsPAGSAAI	Yes
CAP2	10486	adenylyl cyclase-associated protein 2 [Homo sapiens]	S301	AQGGQTQsPTK	5453593	2×TMT6plex [N-Term; K11]; 1×Phospho [S8(100)]	5453593 1×Phospho [S301(100)]	0.000195406	0.00012481	1	1	31	5453593	5453593 [294-304]	0	1640.84	S8(Phospho): 100	18.55	23.65	5.67	2.54	3.02	7.26	8.34	11.65	2.81	1.61	1.97	3.32	4.95921	High	2.03e-05	6.52e-05	49.49	High	7.72e-05	1	S8(Phospho): 100	S8;	5453593	NP_006357.1	AQGGQTQsPTKSHTP	Yes
MCM4	4173	DNA replication licensing factor MCM4 [Homo sapiens]	S131	GLQVDLQsDGAAAEDIVASEQSLGQK	33469919	2×TMT6plex [N-Term; K26]; 1×Phospho [S8(100)]	33469919 1×Phospho [S131(100)]	5.76e-05	6.55e-05	1	1	4	33469919	33469919 [124-149]	0	3167.59	S8(Phospho): 100	7.72	4.68	5.21	4.53	4.76	5.99	0.76	1.3	0.87	0.95	1.42	0.95	5.63205	High	1.3e-05	2.57e-05	48.85	High	5.72e-05	1	S8(Phospho): 100	S8;	33469919	NP_005905.2	GLQVDLQsDGAAAED	Yes
TFDP1	7027	transcription factor Dp-1 [Homo sapiens]	S23	VFIDQNLsPGK	6005900	2×TMT6plex [N-Term; K11]; 1×Phospho [S8(100)]	6005900 1×Phospho [S23(100)]	0.00106941	0.000214298	1	1	6	6005900	6005900 [16-26]	0	1755.94	S8(Phospho): 100	5.66	4	4.3	2.98	4.87	3.94	2.09	2.02	1.82	1.39	2.12	1.94	4.16669	High	5.93e-05	0.0002473	40.45	High	8.79e-05	1	S8(Phospho): 100	S8;	6005900	NP_009042.1	VFIDQNLsPGKGVVS	Yes
NIPBL	25836	nipped-B-like protein isoform A [Homo sapiens]	S350	AAMYDIISsPSK	47578105	2×TMT6plex [N-Term; K12]; 1×Phospho [S9(100)]	47578105 1×Phospho [S350(100)]	0.000320049	0.000147488	1	2	11	47578107; 47578105	47578105 [342-353]	0	1820.93	S9(Phospho): 99.99	6.61	4.77	5.03	4.37	5.23	4.37	1.51	1.62	1.53	1.05	1.7	1.73	3.72245	High	0.0001218	0.0007247	31.67	High	0.0001929	1	S9(Phospho): 99.99	S9;	47578105	NP_597677.2	AMYDIISsPSKDSTK	Yes
GATAD2A	54815	transcriptional repressor p66-alpha isoform 1 [Homo sapiens]	T49	GLLASDLNTDGDMRVtPEPGAGPTQGLLR	665821193	1×TMT6plex [N-Term]; 2×Deamidated [N8; Q25]; 1×Phospho [T16(100)]	665821193 1×Phospho [T49(100)]	0.000628874	0.000193352	1	2	3	164519146; 665821193	665821193 [34-62]	1	3262.59	T16(Phospho): 99.96	4.02	4.76	3.06	2.29	3.2	3.96							4.10958	High	5.25e-05	0.0001663	25.68	High	8.79e-05	1	T16(Phospho): 99.96	T16;	665821193	NP_001287875.1	TDGDMRVtPEPGAGP	Yes
HIST1H1E	3008	histone H1.4 [Homo sapiens]	T18	SETAPAAPAAPAPAEKtPVK	4885379	3×TMT6plex [N-Term; K16; K20]; 1×Phospho [T17(100)]	4885379 1×Phospho [T18(100)]	5.94e-05	6.55e-05	1	1	5	4885379	4885379 [2-21]	1	2671.47	T17(Phospho): 100	2.2	3.43	3.09	2.72	5.46	3.65	1.77	3	2.39	1.31	2.7	1.32					35.19	High	1.91e-05	1	T17(Phospho): 100	T17;	4885379	NP_005312.1	APAPAEKtPVKKKAR	Yes
CENPF	1063	centromere protein F [Homo sapiens]	T1541	KEtPSAPAK	55770834	3×TMT6plex [N-Term; K9; K]; 1×Phospho [T3(100)]	55770834 1×Phospho [T1541(100)]	0.0344781	0.00179354	1	1	4	55770834	55770834 [1539-1547]	1	1695.96	T3(Phospho): 100	2.85	2.3	3.64	2.27	2.83	3.11	2.72	3.9	4.19	2.53	2.78	2.97	3.1757	High	0.0004327	0.005803	16.29	High	0.001268	1	T3(Phospho): 100	T3;	55770834	NP_057427.3	ENLTRKEtPSAPAKG	No
HIST1H1C	3006	histone H1.2 [Homo sapiens]	T146	AAGGAtPK	4885375	2×TMT6plex [N-Term; K8]; 1×Phospho [T6(100)]	4885375 1×Phospho [T146(100)]	0.0112461	0.000778694	1	1	16	4885375	4885375 [141-148]	0	1210.66	T6(Phospho): 100	3.28	3.54	3.97	2.78	3.03	4.58	2.27	2.81	2.97	2.32	2.31	3.25	3.46525	High	0.004364	0.09011	31.94	High	0.002476	1	T6(Phospho): 100	T6;	4885375	NP_005310.1	KKAAGGAtPKKSAKK	Yes
PRC1	9055	protein regulator of cytokinesis 1 isoform 1 [Homo sapiens]	T481	GLAPNtPGK	4506039	2×TMT6plex [N-Term; K9]; 1×Phospho [T6(100)]	4506039 1×Phospho [T481(100)]	0.0811332	0.00366936	1	3	4	4506039; 40807443; 389886545	4506039 [476-484]	0	1392.77	T6(Phospho): 100	3.12	5.33	4.87	5.83	2.89	2.15	1.12	1.78	1.54	1.46	1.67	1.74	2.11776	High	0.001535	0.02846	10.75	High	0.003618	1	T6(Phospho): 100	T6;	4506039	NP_003972.1	RRGLAPNtPGKARKL	Yes
RIC1	57589	RAB6A-GEF complex partner protein 1 isoform a [Homo sapiens]	T992	AIGSGESEtPPSTPTAQEPSSSGGFEFFR	330864707	1×TMT6plex [N-Term]; 1×Deamidated [Q17]; 1×Phospho [T9(93.7)]	330864707 1×Phospho [T992(93.7)]	0.000306001	0.000147488	1	3	2	330864720; 330864713; 330864707	330864707 [984-1012]	0	3267.46	T9(Phospho): 93.74	3.2	4.69	2.47	2.58	3.19	2.63							3.01085	High	3.79e-05	0.000114	22.63	High	6.51e-05	1	T9(Phospho): 93.74	T9;	330864707	NP_065880.2	IGSGESEtPPSTPTA	Yes
GTF3C1	2975	general transcription factor 3C polypeptide 1 isoform 1 [Homo sapiens]	T516	TQPHHSTPtK	101943240	2×TMT6plex [N-Term; K10]; 1×Phospho [T9(100)]	101943240 1×Phospho [T516(100)]	0.0110093	0.000778694	1	2	6	555943794; 101943240	101943240 [508-517]	0	1671.86	T9(Phospho): 99.46	2.71	2.21	3.17	2.53	4.09	4.76							3.5712	High	0.002236	0.04293	18.84	High	0.0002447	1	T9(Phospho): 99.46	T9;	101943240	NP_001511.2	QPHHSTPtKGGWKVV	No
CDC20	991	cell division cycle protein 20 homolog [Homo sapiens]	T106	ENQPENSQtPTKK	118402582	3×TMT6plex [N-Term; K12; K13]; 1×Deamidated [Q8; N/Q]; 1×Phospho [T9(100)]	118402582 1×Phospho [T106(100)]	0.0496525	0.00235664	1	1	8	118402582	118402582 [98-110]	1	2269.17	T9(Phospho): 99.98	3.21	3.96	5.73	2.01	3.79	3.67	2.8	3.12	3.94	1.35	3.15	2.58	3.18948	High	0.003315	0.06514	15.14	High	0.004328	1	T9(Phospho): 99.98	T9;	118402582	NP_001246.2	NQPENSQtPTKKEHQ	Yes
KAT5	10524	histone acetyltransferase KAT5 isoform 1 [Homo sapiens]	S232	KSNCLGTDEDsQDSSDGIPSAPR	36287069	2×TMT6plex [N-Term; K]; 1×Carbamidomethyl [C4]; 1×Phospho [S11(92.1)]	36287069 1×Phospho [S232(92.1)]	0.113665	0.00558292	1	4	6	36287049; 36287060; 36287069; 332205931	36287069 [222-244]	1	2974.35	S11(Phospho): 92.13	2.48	2.31	2.52	2.76	3.45	2.9	1.08	0.99	1.17	1.2	1.34	0.93	2.23324	High	0.001286	0.02254	3.91	High	0.00167	1	S11(Phospho): 92.13	S11;	36287069	NP_874369.1	CLGTDEDsQDSSDGI	No
MEA1	4201	male-enhanced antigen 1 [Homo sapiens]	S114	IQALGLHLPDPPLEsEDEDEEGATALNNHSSIPMDPEHVELVK	7657326	2×TMT6plex [N-Term; K43]; 3×Deamidated [Q2; N27; N28]; 1×Phospho [S15(99.9)]	7657326 1×Phospho [S114(99.9)]	0.000382821	0.000183024	1	1	29	7657326	7657326 [100-142]	0	5227.5	S15(Phospho): 99.88	2.25	2.11	2.5	2.48	2.25	2.65	0.95	1.09	0.87	0.89	0.64	0.74	5.9243	High	5.93e-05	0.0001867	13.9	High	0.0001196	1	S15(Phospho): 99.88	S15;	7657326	NP_055438.1	LPDPPLEsEDEDEEG	Yes
ADAM22	53616	disintegrin and metalloproteinase domain-containing protein 22 isoform 1 preproprotein [Homo sapiens]	S834	SNsWQGNLGGNK	11497047	2×TMT6plex [N-Term; K12]; 1×Phospho [S3(100)]	11497047 1×Phospho [S834(100)]	0.000735865	0.000193352	1	5	4	21536383; 11497043; 21536386; 11497047; 4757722	11497047 [832-843]	0	1799.88	S3(Phospho): 100	3.01	2.65	4.96	2.92	3.23	2.82	1.41	1.4	2.35	1.26	1.61	1.48	4.41373	High	5.93e-05	0.0001871	18.45	High	0.0002679	1	S3(Phospho): 100	S3;	11497047	NP_068369.1	NGRPRSNsWQGNLGG	Yes
UBAP2L	9898	ubiquitin-associated protein 2-like isoform a [Homo sapiens]	S467	STSAPQMsPGSSDNQSSSPQPAQQK	188497758	2×TMT6plex [N-Term; K25]; 2×Phospho [S8(100); S/T]	188497758 2×Phospho [S467(100); S/T]	0.000388521	0.000183024	1	4	10	188497756; 568215065; 568214245; 188497758	188497758 [460-484]	0	3150.39	S8(Phospho): 100; S11(Phospho): 49.51; S12(Phospho): 49.51	3.16	2.11	3.47	2.48	3.6	4.11	0.94	0.64	1.01	0.78	1.11	1.1	3.533	High	3.79e-05	0.0001149	30.85	High	0.0001068	1	S8(Phospho): 100; S11(Phospho): 49.51; S12(Phospho): 49.51	S8;	188497758	NP_055662.3	STSAPQMsPGSSDNQ	Yes
DKC1	1736	H/ACA ribonucleoprotein complex subunit 4 isoform 1 [Homo sapiens]	S21	sLPEEDVAEIQHAEEFLIKPESK	4503337	3×TMT6plex [N-Term; K19; K23]; 1×Phospho [S1(100)]	4503337 1×Phospho [S21(100)]	4.27e-05	0	1	3	8	570700851; 4503337; 215599015	4503337 [21-43]	0	3405.78	S1(Phospho): 100	3.08	2.47	2.18	1.32	2.6	2.64	5.02	3.2	3.48	1.63	4.2	3.73	10.3192	High	0	3.46e-06	50.22	High	1.91e-05	1	S1(Phospho): 100	S1;	4503337	NP_001354.1	KKKKERKsLPEEDVA	Yes
TOP2A	7153	DNA topoisomerase 2-alpha [Homo sapiens]	S1106	VPDEEENEEsDNEKETEK	19913406	3×TMT6plex [N-Term; K14; K18]; 1×Phospho [S10(100)]	19913406 1×Phospho [S1106(100)]	0.000120912	9e-05	1	1	19	19913406	19913406 [1097-1114]	1	2917.34	S10(Phospho): 100	2.65	2.02	3.03	1.84	2.35	2.17	2.95	2.12	2.97	1.73	2.35	1.88	6.15055	High	2.03e-05	4.33e-05	27.25	High	8.27e-05	1	S10(Phospho): 100	S10;	19913406	NP_001058.2	DEEENEEsDNEKETE	Yes
HNRNPAB	3182	heterogeneous nuclear ribonucleoprotein A/B isoform b [Homo sapiens]	S242	EVYQQQQYGsGGR	55956921	1×TMT6plex [N-Term]; 1×Phospho [S10(100)]	55956921 1×Phospho [S242(100)]	0.00202596	0.000261096	1	2	8	55956921; 55956919	55956921 [233-245]	0	1808.82	S10(Phospho): 100	2.24	2.01	2	2.11	2.29	2.01	1.46	1.39	1.52	1.43	1.74	1.4	3.70297	High	7.41e-05	0.0004081	27.35	High	0.0001435	1	S10(Phospho): 100	S10;	55956921	NP_004490.2	YQQQQYGsGGRGNRN	Yes
CHTF18	63922	chromosome transmission fidelity protein 18 homolog [Homo sapiens]	S871	VENSPQVDGsPPGLEGLLGGIGEK	27501458	2×TMT6plex [N-Term; K24]; 1×Phospho [S10(100)]	27501458 1×Phospho [S871(100)]	4.31e-05	6.55e-05	1	1	18	27501458	27501458 [862-885]	0	2887.49	S10(Phospho): 100	2.04	1.13	2.46	2.45	3.21	2.1	1.77	1.65	2.17	1.96	2.47	1.77	6.86059	High	0	1.74e-05	64.24	High	1.91e-05	1	S10(Phospho): 100	S10;	27501458	NP_071375.1	NSPQVDGsPPGLEGL	Yes
XRCC1	7515	DNA repair protein XRCC1 [Homo sapiens]	S241	AIGSTSKPQEsPK	190684675	3×TMT6plex [N-Term; K7; K13]; 1×Phospho [S11(100)]	190684675 1×Phospho [S241(100)]	0.001854	0.000236062	1	1	11	190684675	190684675 [231-243]	0	2097.16	S11(Phospho): 100	2.32	2.02	2.29	2.53	2.33	1.89	1.86	1.85	1.92	2.64	2.2	1.85	4.33672	High	7.41e-05	0.0003796	20.18	High	0.0001264	1	S11(Phospho): 100	S11;	190684675	NP_006288.2	STSKPQEsPKGKRKL	Yes
TPX2	22974	targeting protein for Xklp2 [Homo sapiens]	S738	SSDQPLTVPVsPK	20127519	2×TMT6plex [N-Term; K13]; 1×Phospho [S11(100)]	20127519 1×Phospho [S738(100)]	0.000170645	0.00012481	1	1	6	20127519	20127519 [728-740]	0	1893.01	S11(Phospho): 100	2.29	2.14	2.57	1.49	2.04	2.17	3.64	3.27	3.42	2.22	2.43	3.53	4.16653	High	2.03e-05	7.12e-05	26.98	High	7.72e-05	1	S11(Phospho): 100	S11;	20127519	NP_036244.2	QPLTVPVsPKFSTRF	Yes
SAMHD1	25939	deoxynucleoside triphosphate triphosphohydrolase SAMHD1 [Homo sapiens]	S33	TPSNTPSAEADWsPGLELHPDYK	38016914	2×TMT6plex [N-Term; K23]; 1×Deamidated [N4]; 1×Phospho [S13(100)]	38016914 1×Phospho [S33(100)]	0.000300817	0.000147488	1	1	2	38016914	38016914 [21-43]	0	3051.44	S13(Phospho): 100	2.84	2.8	3.63	3.25	2.05	4.35							4.98854	High	2.03e-05	9.3e-05	19.21	High	0.0001068	1	S13(Phospho): 100	S13;	38016914	NP_056289.2	PSAEADWsPGLELHP	Yes
TP53BP1	7158	tumor suppressor p53-binding protein 1 isoform 1 [Homo sapiens]	S1033	KNGSTAVAESVAsPQK	213972636	3×TMT6plex [N-Term; K16; K]; 2×Deamidated [N2; Q15]; 1×Phospho [S13(100)]	213972636 1×Phospho [S1033(100)]	0.000158244	9e-05	1	3	3	5032189; 213972634; 213972636	213972636 [1021-1036]	1	2343.24	S13(Phospho): 100	2.28	1.82	2.07	2.17	2.35	2.06							5.48531	High	2.03e-05	5.34e-05	27.12	High	8.36e-05	1	S13(Phospho): 100	S13;	213972636	NP_001135452.1	AVAESVAsPQKTMSV	No
RRM2	6241	ribonucleoside-diphosphate reductase subunit M2 isoform 1 [Homo sapiens]	S80	VPLAPITDPQQLQLsPLK	260064013	2×TMT6plex [N-Term; K18]; 2×Deamidated [Q]; 1×Phospho [S15(100)]	260064013 1×Phospho [S80(100)]	8.89e-05	9e-05	1	2	12	260064013; 4557845	260064013 [66-83]	0	2498.39	S15(Phospho): 100	4.69	3.55	2.46	1.92	2.45	2.24							5.44023	High	2.03e-05	3.51e-05	49.37	High	3.2e-05	1	S15(Phospho): 100	S15;	260064013	NP_001159403.1	DPQQLQLsPLKGLSL	No
CLINT1	9685	clathrin interactor 1 isoform 1 [Homo sapiens]	S299	TIDLGAAAHYTGDKAsPDQNASTHTPQSSVK	307078123	3×TMT6plex [N-Term; K14; K31]; 1×Deamidated [Q/N]; 1×Phospho [S16(97.6)]	307078123 1×Phospho [S299(97.6)]	4.27e-05	6.55e-05	1	3	10	307078123; 7661968; 307078125	307078123 [284-314]	1	3936.96	S16(Phospho): 97.57	2.56	2.25	2.3	2.44	2.22	2.27							9.22296	High	0	1.5e-05	22.03	High	2.27e-05	1	S16(Phospho): 97.57	S16;	307078123	NP_001182484.1	HYTGDKAsPDQNAST	Yes
INF2	64423	inverted formin-2 isoform 1 [Homo sapiens]	S1077	SsWYVDASDVLTTEDPQCPQPLEGAWPVTLGDAQALKPLK	149999380	3×TMT6plex [N-Term; K37; K40]; 1×Carbamidomethyl [C18]; 1×Phospho [S2(95.7)]	149999380 1×Phospho [S1077(95.7)]	4.27e-05	6.55e-05	1	2	5	149999378; 149999380	149999380 [1076-1115]	0	5150.6	S2(Phospho): 95.67	1.84	2.74	2.18	5.42	2.53	4.47							6.79304	High	0	1.49e-05	24.98	High	1.91e-05	1	S2(Phospho): 95.67	S2;	149999380	NP_071934.3	RPLERRSsWYVDASD	Yes
KDM2A	22992	lysine-specific demethylase 2A isoform a [Homo sapiens]	S740	SsPGAGPSDHHSASR	16306580	1×TMT6plex [N-Term]; 1×Phospho [S2(99.5)]	16306580 1×Phospho [S740(99.5)]	4.27e-05	6.55e-05	1	2	26	373938467; 16306580	16306580 [739-753]	0	1758.78	S2(Phospho): 99.51	4.6	2.23	2.66	1.69	4.34	2.96	4.47	2.8	3.63	1.85	5.86	3.56	8.60322	High	0	7.08e-06	86.52	High	1.91e-05	1	S2(Phospho): 99.51	S2;	16306580	NP_036440.1	RGMVTRSsPGAGPSD	Yes
ARHGAP17	55114	rho GTPase-activating protein 17 isoform 1 [Homo sapiens]	S575	AESSSGGGTVPSSAGILEQGPSPGDGsPPKPK	54860079	3×TMT6plex [N-Term; K30; K32]; 1×Deamidated [Q19]; 1×Phospho [S27(100)]	54860079 1×Phospho [S575(100)]	0.0295777	0.00159584	1	1	2	54860079	54860079 [549-580]	0	3703.87	S27(Phospho): 100	2.78	2.97	3.74	2.75	1.87	4.55							2.31677	High	0.0003858	0.004953	4.8	High	0.0004855	1	S27(Phospho): 100	S27;	54860079	NP_001006635.1	GPSPGDGsPPKPKDP	Yes
RIF1	55183	telomere-associated protein RIF1 isoform 1 [Homo sapiens]	S782	VKsPQRPSDWSK	56676335	3×TMT6plex [N-Term; K2; K12]; 1×Phospho [S3(100)]	56676335 1×Phospho [S782(100)]	0.047382	0.00222546	1	2	7	295054210; 56676335	56676335 [780-791]	1	2182.2	S3(Phospho): 100	3.49	1.99	3.26	2.38	3.85	2.54	3.88	2.16	4.17	2.08	4.06	3.03	3.77737	High	0.001761	0.03206	9.63	High	0.001422	1	S3(Phospho): 100	S3;	56676335	NP_060621.3	KYQPKVKsPQRPSDW	Yes
RIF1	55183	telomere-associated protein RIF1 isoform 1 [Homo sapiens]	S1688	RDsFDNCSLGESSK	56676335	2×TMT6plex [N-Term; K14]; 1×Carbamidomethyl [C7]; 1×Phospho [S3(100)]	56676335 1×Phospho [S1688(100)]	7.77e-05	9e-05	1	2	5	295054210; 56676335	56676335 [1686-1699]	1	2139.98	S3(Phospho): 100	3.21	1.67	5.13	2.89	7.15	4.05							6.00689	High	2.03e-05	3.21e-05	46.29	High	6.51e-05	1	S3(Phospho): 100	S3;	56676335	NP_060621.3	KRLHKRDsFDNCSLG	Yes
GPRC5B	51704	G-protein coupled receptor family C group 5 member B isoform 2 [Homo sapiens]	S491	RPsGSLGK	755571572	2×TMT6plex [N-Term; K8]; 1×Phospho [S3(100)]	755571572 1×Phospho [S491(100)]	0.0580464	0.00256668	1	2	6	7706451; 755571572	755571572 [489-496]	0	1339.75	S3(Phospho): 100	2.46	8.02	11.16	3.36	2.03	3.74	1.93	8.99	14.44	6.09	2.12	3.93	3.22301	High	0.0006612	0.01009	18.8	High	0.008307	1	S3(Phospho): 100	S3;	755571572	NP_001291700.1	GSLGKRPsGSLGKRP	No
TACC3	10460	transforming acidic coiled-coil-containing protein 3 [Homo sapiens]	S71	ILsPSMASK	5454102	2×TMT6plex [N-Term; K9]; 1×Phospho [S3(100)]	5454102 1×Phospho [S71(100)]	0.0132575	0.000802252	1	1	4	5454102	5454102 [69-77]	0	1471.8	S3(Phospho): 100	2.13	3.84	3.3	1.74	2.39	2.22	2.08	5.04	2.61	1.53	1.93	2.22	2.73539	High	0.0006612	0.01003	31.48	High	0.0002223	1	S3(Phospho): 100	S3;	5454102	NP_006333.1	PQTHRILsPSMASKL	Yes
PML	5371	protein PML isoform 2 [Homo sapiens]	S518; S527; S530	AVsPPHLDGPPsPRsPVIGSEVFLPNSNHVASGAGEAEER	67089157	1×TMT6plex [N-Term]; 1×Deamidated [N]; 3×Phospho [S3(100); S12(99.8); S15(96.1)]	67089157 3×Phospho [S518(100); S527(99.8); S530(96.1)]	0.000278434	0.000147488	1	6	17	4505903; 67089160; 15451779; 67089157; 15451765; 67089149	67089157 [516-555]	1	4531.06	S3(Phospho): 100; S12(Phospho): 99.84; S15(Phospho): 96.1	3.39	2.82	2.72	2.49	0.94	2.92	0.91	1.03	0.51	1.08	0.85	0.99	5.03908	High	2.03e-05	8.69e-05	14.82	High	8.27e-05	1	S3(Phospho): 100; S12(Phospho): 99.84; S15(Phospho): 96.1	S3; S12; S15;	67089157	NP_150243.2	PSTSKAVsPPHLDGP;PHLDGPPsPRSPVIG;DGPPSPRsPVIGSEV	Yes;Yes;Yes
SH3KBP1	30011	SH3 domain-containing kinase-binding protein 1 isoform a [Homo sapiens]	S587	ANsPSLFGTEGKPK	13994242	3×TMT6plex [N-Term; K12; K14]; 1×Phospho [S3(100)]	13994242 1×Phospho [S587(100)]	0.00104364	0.000214298	1	3	12	296785054; 67514036; 13994242	13994242 [585-598]	0	2200.2	S3(Phospho): 99.07	3.69	2.17	2.01	1.55	2.04	2.68	2.81	1.34	1.36	0.9	1.5	1.8	3.84908	High	0.0001218	0.0005374	15.89	High	0.0002679	1	S3(Phospho): 99.07	S3;	13994242	NP_114098.1	TAGHRANsPSLFGTE	Yes
PRRC2C	23215	protein PRRC2C [Homo sapiens]	S187	AAGsPSSSDQDEK	115298682	2×TMT6plex [N-Term; K13]; 1×Phospho [S4(100)]	115298682 1×Phospho [S187(100)]	0.000317833	0.000147488	1	1	9	115298682	115298682 [184-196]	0	1816.84	S4(Phospho): 100	2.78	3.28	2.08	1.61	3.12	2.58	1.93	2.25	1.46	1.16	1.94	1.59	3.6049	High	5.93e-05	0.0001967	51.18	High	6.51e-05	1	S4(Phospho): 100	S4;	115298682	NP_055987.2	DGGKAAGsPSSSDQD	Yes
TP53BP1	7158	tumor suppressor p53-binding protein 1 isoform 1 [Homo sapiens]	S814	EEKsVEYEGDLK	213972636	3×TMT6plex [N-Term; K3; K12]; 1×Phospho [S4(100)]	213972636 1×Phospho [S814(100)]	0.0384127	0.00190073	1	3	4	5032189; 213972634; 213972636	213972636 [811-822]	1	2193.13	S4(Phospho): 100	2.33	1.77	2.96	2.35	3.69	3.25	1.94	1.28	2.42	1.89	3.04	2.81	3.71509	High	0.000488	0.00651	10.8	High	0.0005919	1	S4(Phospho): 100	S4;	213972636	NP_001135452.1	LDTKEEKsVEYEGDL	No
PODXL	5420	podocalyxin isoform 1 precursor [Homo sapiens]	S529	KVVsLNGELGDSWIVPLDNLTK	66277202	3×TMT6plex [N-Term; K22; K]; 1×Phospho [S4(100)]	66277202 1×Phospho [S529(100)]	0.000113788	9e-05	1	2	12	33598950; 66277202	66277202 [526-547]	1	3164.76	S4(Phospho): 100	1.63	2.23	2.37	4.34	2.18	3.61							5.11953	High	2.03e-05	4.14e-05	40.42	High	8.36e-05	1	S4(Phospho): 100	S4;	66277202	NP_001018121.1	MQEKKVVsLNGELGD	Yes
ANKRD13D	338692	ankyrin repeat domain-containing protein 13D [Homo sapiens]	S552; T556	GPGsPPRtPPAPGPPSFEEQLR	269315852	1×TMT6plex [N-Term]; 2×Phospho [S4(100); T8(100)]	269315852 2×Phospho [S552; T556]	0.106975	0.00531489	1	1	2	269315852	269315852 [549-570]	1	2660.25	S4(Phospho): 100; T8(Phospho): 100	3.66	3.5	2.39	3.22	2.42	1.93	1.23	1.02	1.31	0.95	1.1	1.93	2.98402	Low	0.2578	1	2.63	High	0.00123	1	S4(Phospho): 100; T8(Phospho): 100	S4; T8;	269315852	NP_997237.2	TEPRGPGsPPRTPPA;GPGSPPRtPPAPGPP	No;No
TIMELESS	8914	protein timeless homolog [Homo sapiens]	S1173	QLLDsDEEQEEDEGR	222136585	1×TMT6plex [N-Term]; 1×Phospho [S5(100)]	222136585 1×Phospho [S1173(100)]	0.00541504	0.000453644	1	1	2	222136585	222136585 [1169-1183]	0	2100.88	S5(Phospho): 100	3.77	3.2	2.66	1.72	2.01	2.36							2.37784	High	0.0001251	0.0009315	17.07	High	0.0001716	1	S5(Phospho): 100	S5;	222136585	NP_003911.2	KKRQLLDsDEEQEED	Yes
FERMT2	10979	fermitin family homolog 2 isoform 2 [Homo sapiens]	S159	LDDQsEDEALELEGPLITPGSGSIYSSPGLYSK	201861813	2×TMT6plex [N-Term; K33]; 1×Deamidated [Q4]; 1×Phospho [S5(99.9)]	201861813 1×Phospho [S159(99.9)]	0.00057796	0.000193352	1	3	4	201861813; 29789006; 201861823	201861813 [155-187]	0	4006.94	S5(Phospho): 99.92	2.67	2.84	2.16	0.98	2.13	3.57							3.67226	High	5.25e-05	0.0001561	17.69	High	0.0001264	1	S5(Phospho): 99.92	S5;	201861813	NP_001128471.1	KKKLDDQsEDEALEL	Yes
CHAMP1	283489	chromosome alignment-maintaining phosphoprotein 1 [Homo sapiens]	S445; S452	KPSGsPDLWKLsPDQR	41281612	3×TMT6plex [N-Term; K10; K]; 2×Phospho [S5(98.4); S12(100)]	41281612 2×Phospho [S445(98.4); S452(100)]	0.0438312	0.00216174	1	1	5	41281612	41281612 [441-456]	1	2658.37	S5(Phospho): 99.96; S12(Phospho): 100	5.55	2.8	3.1	1.54	2.14	3	4.27	3.15	2.45	1.97	2.17	3.61	5.76958	High	0.0009337	0.01583	10.47	High	0.005074	1	S5(Phospho): 99.96; S12(Phospho): 100	S5; S12;	41281612	NP_115812.1	ELRKPSGsPDLWKLS;SPDLWKLsPDQRKTS	Yes;Yes
MSH6	2956	DNA mismatch repair protein Msh6 isoform 1 [Homo sapiens]	S830	IHNVGsPLK	4504191	2×TMT6plex [N-Term; K9]; 1×Phospho [S6(100)]	4504191 1×Phospho [S830(100)]	0.000504973	0.000193352	1	3	6	528078296; 4504191; 528078300	4504191 [825-833]	0	1502.85	S6(Phospho): 100	2.32	1.09	2.97	2.39	2.9	2.46	2.51	1.25	3.35	3.15	3.34	2.6	4.45711	High	7.41e-05	0.0003762	40.07	High	7.92e-05	1	S6(Phospho): 100	S6;	4504191	NP_000170.1	SKIHNVGsPLKSQNH	Yes
GTSE1	51512	G2 and S phase-expressed protein 1 [Homo sapiens]	S262	KEIPAsPSR	253970412	2×TMT6plex [N-Term; K]; 1×Phospho [S6(99.3)]	253970412 1×Phospho [S262(99.3)]	0.133057	0.00679358	1	1	4	253970412	253970412 [257-265]	1	1522.84	S6(Phospho): 99.42	4.36	4.66	4.72	1.89	2.48	3.6	2.74	2.74	2.62	2.09	1.92	2.14	2.38028	High	0.001427	0.02591	12.84	High	0.001515	1	S6(Phospho): 99.42	S6;	253970412	NP_057510.4	PKKEIPAsPSRTKIP	No
MAPRE2	10982	microtubule-associated protein RP/EB family member 2 isoform 1 [Homo sapiens]	S200	KSHHANsPTAGAAK	10346135	3×TMT6plex [N-Term; K14; K]; 1×Phospho [S7(100)]	10346135 1×Phospho [S200(100)]	0.00011404	9e-05	1	4	10	219842327; 219842325; 374081840; 10346135	10346135 [194-207]	1	2144.16	S7(Phospho): 100	1.99	6.83	4	2.85	3.33	3.44	2.64	10.12	4.97	3.3	3.86	4.13	5.42193	High	2.03e-05	7.59e-05	23.03	High	5.72e-05	1	S7(Phospho): 100	S7;	10346135	NP_055083.1	KKSHHANsPTAGAAK	Yes
SLC30A5	64924	zinc transporter 5 isoform 1 [Homo sapiens]	S378	GTLIGYsPEGTPLYNFMGDAFQHSSQSIPR	20070323	1×TMT6plex [N-Term]; 1×Deamidated [N/Q]; 1×Phospho [S7(98.2)]	20070323 1×Phospho [S378(98.2)]	0.000137147	9e-05	1	1	7	20070323	20070323 [372-401]	0	3580.67	S7(Phospho): 98.15	2.28	2.19	2.58	2.18	1.99	2.29							4.4863	High	2.03e-05	4.76e-05	33.96	High	6.51e-05	1	S7(Phospho): 98.15	S7;	20070323	NP_075053.2	KGTLIGYsPEGTPLY	Yes
PTTG1	9232	securin [Homo sapiens]	S165	LFQLGPPsPVK	4758980	2×TMT6plex [N-Term; K11]; 1×Phospho [S8(100)]	4758980 1×Phospho [S165(100)]	0.000414031	0.000193352	1	2	14	4758980; 154354976	4758980 [158-168]	0	1720.98	S8(Phospho): 100	3.98	2.23	2.29	2.01	2.08	1.05	4.08	2.46	3.01	2.09	2.86	1.36	5.14096	High	4.98e-05	0.0001298	34.32	High	8.36e-05	1	S8(Phospho): 100	S8;	4758980	NP_004210.1	LFQLGPPsPVKMPSP	Yes
NCAPH	23397	condensin complex subunit 2 isoform 1 [Homo sapiens]	S28	GHPHSASsPSER	25121987	1×TMT6plex [N-Term]; 1×Phospho [S8(98.8)]	25121987 1×Phospho [S28(98.8)]	0.000394334	0.000193352	1	2	47	528281401; 25121987	25121987 [21-32]	0	1557.7	S8(Phospho): 98.76	4.57	3.72	4.87	1.32	3.26	3.29	3.39	2.66	3.81	1.37	3.25	3.27	4.92242	High	4.98e-05	0.0001299	37.94	High	0.0001196	1	S8(Phospho): 98.76	S8;	25121987	NP_056156.2	GHPHSASsPSERVFP	Yes
DDX21	9188	nucleolar RNA helicase 2 isoform 1 [Homo sapiens]	S89	EEPSQNDIsPK	50659095	2×TMT6plex [N-Term; K11]; 1×Phospho [S9(100)]	50659095 1×Phospho [S89(100)]	0.000322287	0.000147488	1	2	26	50659095; 379317177	50659095 [81-91]	0	1781.87	S9(Phospho): 100	3.72	2.13	2.8	1.66	2.87	3.09	2.85	1.87	1.91	1.33	2.68	2.57	5.54485	High	5.25e-05	0.0001531	44.55	High	7.92e-05	1	S9(Phospho): 100	S9;	50659095	NP_004719.2	EPSQNDIsPKTKSLR	Yes
PHF3	23469	PHD finger protein 3 isoform 1 [Homo sapiens]	S1133	MAPPVDDLsPK	7662018	2×TMT6plex [N-Term; K11]; 1×Phospho [S9(100)]	7662018 1×Phospho [S1133(100)]	0.00074579	0.000193352	1	2	9	7662018; 589908394	7662018 [1125-1135]	0	1707.88	S9(Phospho): 100	3.05	1.63	2.68	2.45	3.26	2.98	2.8	1.69	2.03	1.66	2.49	2.49	4.66257	High	0.0001218	0.0006141	52.77	High	8.36e-05	1	S9(Phospho): 100	S9;	7662018	NP_055968.1	APPVDDLsPKKVKVV	Yes
NOSIP	51070	nitric oxide synthase-interacting protein [Homo sapiens]	T168	VLPSFWIPSLtPEAK	7705716	2×TMT6plex [N-Term; K15]; 1×Phospho [T11(100)]	7705716 1×Phospho [T168(100)]	0.000445202	0.000193352	1	1	8	7705716	7705716 [158-172]	0	2223.22	T11(Phospho): 99.99	2.93	3.17	5.6	2.25	1.53	2.9	1.2	1.88	2.26	1.29	1.25	1.52	4.59898	High	5.93e-05	0.0001827	36.66	High	0.0001245	1	T11(Phospho): 99.99	T11;	7705716	NP_057037.1	SFWIPSLtPEAKATK	Yes
NPM1	4869	nucleophosmin isoform 1 [Homo sapiens]	T219	SNQNGKDSKPSStPR	10835063	3×TMT6plex [N-Term; K6; K9]; 1×Deamidated [Q/N]; 1×Phospho [T13(99.2)]	10835063 1×Phospho [T219(99.2)]	0.0280413	0.00150426	1	2	50	83641870; 10835063	10835063 [207-221]	1	2371.22	T13(Phospho): 97.29	2.38	3.72	3.69	1.63	2.7	3.43	4.45	6.11	7.24	3.44	5.25	6.48	4.61094	High	0.00398	0.08145	14.27	High	0.0004033	1	T13(Phospho): 97.29	T13;	10835063	NP_002511.1	KDSKPSStPRSKGQE	Yes
HIST1H1E	3008	histone H1.4 [Homo sapiens]	T146	KATGAAtPK	4885379	3×TMT6plex [N-Term; K9; K]; 1×Phospho [T7(100)]	4885379 1×Phospho [T146(100)]	0.0295777	0.00159584	1	1	27	4885379	4885379 [140-148]	1	1611.94	T7(Phospho): 100	2.16	3.85	2.33	2.1	1.72	3.26	2.27	4.2	2.4	2.3	1.95	4.11	4.08906	High	0.001448	0.02622	21.27	High	0.002293	1	T7(Phospho): 100	T7;	4885379	NP_005312.1	KKATGAAtPKKSAKK	Yes
NIPBL	25836	nipped-B-like protein isoform A [Homo sapiens]	T599	STPENHPEtPK	47578105	2×TMT6plex [N-Term; K11]; 1×Phospho [T9(100)]	47578105 1×Phospho [T599(100)]	0.0028297	0.00036439	1	2	4	47578107; 47578105	47578105 [591-601]	0	1774.88	T9(Phospho): 100	2.03	1.49	2.94	2.22	3.31	3.11	1.66	1.35	2.28	1.86	2.61	2.27	4.30713	High	0.0006437	0.009623	27.08	High	0.0001301	1	T9(Phospho): 100	T9;	47578105	NP_597677.2	TPENHPEtPKKKSDP	Yes
TCEAL1	9338	transcription elongation factor A protein-like 1 [Homo sapiens]	S28	TDEERPPVEHsPEK	55749406	2×TMT6plex [N-Term; K14]; 1×Phospho [S11(100)]	55749406 1×Phospho [S28(100)]	0.00035336	0.000147488	1	1	10	55749406	55749406 [18-31]	0	2188.07	S11(Phospho): 100	3.08	1.84	2.41	3.27	3.91	2.86	1.54	1.19	1.19	1.59	1.98	1.3	5.83928	High	2.62e-05	0.0001065	15.48	High	0.0001264	1	S11(Phospho): 100	S11;	55749406	NP_001006640.1	ERPPVEHsPEKQSPE	Yes
CYBRD1	79901	cytochrome b reductase 1 isoform 1 [Homo sapiens]	S260	GSMPAYSGNNMDKsDSELNSEVAAR	188536036	2×TMT6plex [N-Term; K13]; 1×Phospho [S14(98.4)]	188536036 1×Phospho [S260(98.4)]	9.01e-05	9e-05	1	2	2	379642611; 188536036	188536036 [247-271]	1	3168.44	S14(Phospho): 98.39	7.93	7.28	2.12	3.05	0.84	6.35							4.52799	High	2.03e-05	3.54e-05	31.16	High	2.27e-05	1	S14(Phospho): 98.39	S14;	188536036	NP_079119.3	SGNNMDKsDSELNSE	Yes
PARVA	55742	alpha-parvin [Homo sapiens]	S102	EVSELQEEGMNAINLPLsPIPFELDPEDTMLEENEVR	315583337	1×TMT6plex [N-Term]; 1×Phospho [S18(100)]	315583337 1×Phospho [S102(100)]	6.16e-05	6.55e-05	1	1	4	315583337	315583337 [85-121]	0	4536.13	S18(Phospho): 100	2.09	2.02	2.14	2.48	1.79	2.3							5.18243	High	1.3e-05	2.71e-05	14.27	High	6.51e-05	1	S18(Phospho): 100	S18;	315583337	NP_060692.2	NAINLPLsPIPFELD	No
IPO5	3843	importin-5 [Homo sapiens]	S670	TASIKPEVALLDTQDMENMsDDDGWEFVNLGDQQSFGIK	24797086	3×TMT6plex [N-Term; K5; K39]; 2×Deamidated [N18; N/Q]; 1×Oxidation [M]; 1×Phospho [S20(100)]	24797086 1×Phospho [S670(100)]	6.76e-05	6.55e-05	1	1	7	24797086	24797086 [651-689]	0	5129.41	S20(Phospho): 100	2.32	2.64	1.68	2.45	3.2	4.41							4.29153	High	1.3e-05	2.92e-05	44.84	High	3.2e-05	1	S20(Phospho): 100	S20;	24797086	NP_002262.3	TQDMENMsDDDGWEF	No
ESF1	51575	ESF1 homolog [Homo sapiens]	S153	IDSNIsPK	18093112	2×TMT6plex [N-Term; K8]; 1×Phospho [S6(100)]	18093112 1×Phospho [S153(100)]	0.0589603	0.00261028	1	1	10	18093112	18093112 [148-155]	0	1411.76	S6(Phospho): 100	2.94	0.91	2.37	2.4	2.78	2.48	2.55	1.04	1.87	2.34	2.34	2.4	3.93204	High	0.0006791	0.0103	25.07	High	0.002086	1	S6(Phospho): 100	S6;	18093112	NP_057733.2	FKIDSNIsPKKDSKE	Yes
CDC40	51362	pre-mRNA-processing factor 17 [Homo sapiens]	S43	sPSSKPSLAVAVDSAPEVAVK	7706657	3×TMT6plex [N-Term; K5; K21]; 1×Phospho [S1(100)]	7706657 1×Phospho [S43(100)]	4.27e-05	6.55e-05	1	1	18	7706657	7706657 [43-63]	0	2806.56	S1(Phospho): 100	3.25	2.18	2.11	1.32	2.33	1.89	1.59	1.25	0.98	0.76	1.2	1	8.2879	High	0	1.09e-05	49.88	High	1.91e-05	1	S1(Phospho): 100	S1;	7706657	NP_056975.1	SLMHLTKsPSSKPSL	Yes
GMNN	51053	geminin [Homo sapiens]	S64	NDHLTSTTSsPGVIVPESSENK	7705682	2×TMT6plex [N-Term; K22]; 1×Phospho [S10(96.6)]	7705682 1×Phospho [S64(96.6)]	6.42e-05	6.55e-05	1	1	14	7705682	7705682 [55-76]	0	2837.4	S10(Phospho): 96.6	2.58	3.86	2.44	1.8	2.75	2	1.91	2.77	1.7	1.15	2.75	1.54	5.27862	High	2.03e-05	3.79e-05	23.33	High	6.51e-05	1	S10(Phospho): 96.6	S10;	7705682	NP_056979.1	HLTSTTSsPGVIVPE	Yes
XRN2	22803	5'-3' exoribonuclease 2 [Homo sapiens]	S448	NsPGSQVASNPR	18860916	1×TMT6plex [N-Term]; 1×Deamidated [Q6]; 1×Phospho [S2(100)]	18860916 1×Phospho [S448(100)]	0.00904524	0.00064256	1	1	4	18860916	18860916 [447-458]	0	1523.71	S2(Phospho): 100	1.64	1.23	2.09	2.16	2.57	2.3	1.1	0.82	1.02	0.96	1.04	1.21	2.34703	High	0.0001801	0.001509	11.43	High	0.0004087	1	S2(Phospho): 100	S2;	18860916	NP_036387.2	HALGSRNsPGSQVAS	Yes
MAPT	4137	microtubule-associated protein tau isoform 6 [Homo sapiens]	S438	HPTPGSSDPLIQPSSPAVCPEPPSsPK	294862258	2×TMT6plex [N-Term; K27]; 1×Carbamidomethyl [C19]; 1×Phospho [S25(98.3)]	294862258 1×Phospho [S438(98.3)]	7.27e-05	9e-05	1	2	12	294862258; 294862261	294862258 [414-440]	0	3304.63	S25(Phospho): 98.28	2.2	2.43	2.07	2.21	1.97	2.02	1.95	2	1.73	1.96	1.44	1.67	5.90186	High	2.03e-05	5.13e-05	16.86	High	6.51e-05	1	S25(Phospho): 98.28	S25;	294862258	NP_001116538.2	VCPEPPSsPKYVSSV	No
AKAP12	9590	A-kinase anchor protein 12 isoform 1 [Homo sapiens]	S627	RPsESDKEDELDK	21493022	3×TMT6plex [N-Term; K7; K13]; 1×Phospho [S3(100)]	21493022 1×Phospho [S627(100)]	0.0016189	0.000236062	1	2	8	21493022; 21493024	21493022 [625-637]	1	2315.17	S3(Phospho): 100	2.21	4.22	6.42	4.83	0.76	2.81	1.9	3.54	6.3	6.1	1.43	4.6	5.40766	High	7.41e-05	0.0003416	3.7	High	0.002731	1	S3(Phospho): 100	S3;	21493022	NP_005091.2	KKRVRRPsESDKEDE	Yes
RECQL4	9401	ATP-dependent DNA helicase Q4 [Homo sapiens]	S251	VGsPQPSSSGGEK	284005309	2×TMT6plex [N-Term; K13]; 1×Phospho [S3(100)]	284005309 1×Phospho [S251(100)]	0.00188488	0.000261096	1	1	4	284005309	284005309 [249-261]	0	1754.87	S3(Phospho): 100	2.15	1.45	2.87	2.17	2.1	1.71							3.98826	High	0.0001218	0.0008788	41.42	High	0.0001196	1	S3(Phospho): 100	S3;	284005309	NP_004251.3	EVSIRVGsPQPSSSG	Yes
CHAMP1	283489	chromosome alignment-maintaining phosphoprotein 1 [Homo sapiens]	S282; S286; S297	KPsPSEsPEPWKPFPAVsPEPR	41281612	3×TMT6plex [N-Term; K12; K]; 3×Phospho [S3(100); S7(100); S18(100)]	41281612 3×Phospho [S282(100); S286(100); S297(100)]	0.0246515	0.00139708	1	1	3	41281612	41281612 [280-301]	0	3373.63	S3(Phospho): 100; S7(Phospho): 99.95; S18(Phospho): 100	3.07	2.09	2.12	1.91	1.93	2.46							4.33597	High	0.001027	0.01769	2.62	Medium	0.03415	1	S3(Phospho): 100; S7(Phospho): 99.95; S18(Phospho): 100	S3; S7; S18;	41281612	NP_115812.1	SPEPRKPsPSESPEP;RKPSPSEsPEPWKPF;WKPFPAVsPEPRRPA	Yes;Yes;Yes
LRCH3	84859	leucine-rich repeat and calponin homology domain-containing protein 3 precursor [Homo sapiens]	S516	ASQsPQK	14249428	2×TMT6plex [N-Term; K7]; 1×Phospho [S4(100)]	14249428 1×Phospho [S516]	0.163441	0.00868295	1	1	1	14249428	14249428 [513-519]	0	1283.68	S4(Phospho): 100	5.58	5.19	3.05	1.45	2.92	2.54							2.65243	Medium	0.03077	0.5308	20.71	High	0.001933	1	S4(Phospho): 100	S4;	14249428	NP_116162.1	VKQKASQsPQKQHPL	No
PODXL	5420	podocalyxin isoform 1 precursor [Homo sapiens]	S529	KVVsLNGELGDSWIVPLDNLTK	66277202	3×TMT6plex [N-Term; K22; K]; 1×Deamidated [N6]; 1×Phospho [S4(100)]	66277202 1×Phospho [S529(100)]	4.39e-05	6.55e-05	1	2	10	33598950; 66277202	66277202 [526-547]	1	3165.74	S4(Phospho): 100	1.51	2.22	2.91	3.29	1.93	3.5	1.82	3.72	4.19	3.43	2.07	5.96	6.09492	High	2.03e-05	5.55e-05	46.03	High	5.72e-05	1	S4(Phospho): 100	S4;	66277202	NP_001018121.1	MQEKKVVsLNGELGD	Yes
MCM2	4171	DNA replication licensing factor MCM2 [Homo sapiens]	S139	GLLYDsDEEDEERPAR	33356547	1×TMT6plex [N-Term]; 1×Phospho [S6(100)]	33356547 1×Phospho [S139(100)]	7.55e-05	9e-05	1	1	54	33356547	33356547 [134-149]	0	2202.98	S6(Phospho): 100	3.39	1.75	2.84	1.76	2.31	2.11	2.14	1.38	2.1	1.58	1.74	1.51	6.58454	High	2.03e-05	3.34e-05	52.85	High	5.72e-05	1	S6(Phospho): 100	S6;	33356547	NP_004517.2	RRGLLYDsDEEDEER	Yes
FOXK2	3607	forkhead box protein K2 [Homo sapiens]	S170	QEASEsPVK	31563338	2×TMT6plex [N-Term; K9]; 1×Phospho [S6(100)]	31563338 1×Phospho [S170(100)]	0.0112461	0.000778694	1	1	5	31563338	31563338 [165-173]	0	1512.77	S6(Phospho): 100	2.89	2.81	2.3	1.84	2.17	1.98	1.18	0.95	1.05	1.12	1.1	1.3	3.31666	High	0.0002269	0.002488	25.19	High	0.0001997	1	S6(Phospho): 100	S6;	31563338	NP_004505.2	EKQEASEsPVKAVQP	Yes
ARHGAP39	80728	rho GTPase-activating protein 39 isoform 2 [Homo sapiens]	S123	ASAESsPGR	58331179	1×TMT6plex [N-Term]; 1×Phospho [S6(99.4)]	58331179 1×Phospho [S123(99.4)]	0.0768468	0.0036087	1	2	3	815659685; 58331179	58331179 [118-126]	0	1170.54	S6(Phospho): 99.35	3.55	2.22	2.65	1.7	2.75	1.39							2.29368	High	0.002056	0.03936	13.33	High	0.0008515	1	S6(Phospho): 99.35	S6;	58331179	NP_079527.1	PRASAESsPGRGSSV	Yes
DUT	1854	deoxyuridine 5'-triphosphate nucleotidohydrolase, mitochondrial isoform 2 [Homo sapiens]	S160	GSGGFGsTGKN	4503423	2×TMT6plex [N-Term; K10]; 1×Phospho [S7(100)]	4503423 1×Phospho [S160(100)]	0.161087	0.00849461	1	3	4	70906444; 4503423; 70906441	4503423 [154-164]	1	1506.74	S7(Phospho): 99.99	2.84	1.74	2.75	1.72	2.68	2.76							2.74822	High	0.006384	0.1334	9.23	High	0.001903	1	S7(Phospho): 99.99	S7;	4503423	NP_001939.1	RGSGGFGsTGKN_	No
CLSPN	63967	claspin isoform 1 [Homo sapiens]	S1289	NFVFHTLsPVK	21735569	2×TMT6plex [N-Term; K11]; 1×Phospho [S8(100)]	21735569 1×Phospho [S1289(100)]	0.00115727	0.000214298	1	2	4	21735569; 299522984	21735569 [1282-1292]	0	1827	S8(Phospho): 100	3.02	1.56	2.92	3.16	2.22	1.54	2.76	1.49	2.09	3.38	2.86	1.6	4.27554	High	6.84e-05	0.0002634	21.2	High	0.0001196	1	S8(Phospho): 100	S8;	21735569	NP_071394.2	NFVFHTLsPVKAEAA	Yes
MMS19	64210	MMS19 nucleotide excision repair protein homolog isoform 1 [Homo sapiens]	S1027	GEWFLLGsPGS	170763479	1×TMT6plex [N-Term]; 1×Phospho [S8(98.9)]	170763479 1×Phospho [S1027(98.9)]	0.0257953	0.00144266	1	3	4	170763479; 574957012; 574957085	170763479 [1020-1030]	0	1458.69	S8(Phospho): 98.93	2.78	2.5	2.05	2.36	1.75	1.74	1.36	1.04	1.09	1.67	1.1	0.97	2.82769	High	0.0006231	0.009072	25.43	High	0.0003411	1	S8(Phospho): 98.93	S8;	170763479	NP_071757.4	GEWFLLGsPGS_	Yes
CNOT3	4849	CCR4-NOT transcription complex subunit 3 [Homo sapiens]	S299	STDSEVSQsPAK	7657387	2×TMT6plex [N-Term; K12]; 1×Deamidated [Q8]; 1×Phospho [S9(100)]	7657387 1×Phospho [S299(100)]	0.00197026	0.000261096	1	1	6	7657387	7657387 [291-302]	0	1774.85	S9(Phospho): 100	2.19	1.69	2.55	1.84	2.27	2.61	1.55	1.4	1.25	1.26	1.25	1.42	4.1988	High	7.41e-05	0.0003992	33.92	High	0.0001196	1	S9(Phospho): 100	S9;	7657387	NP_055331.1	TDSEVSQsPAKNGSK	Yes
TP53BP1	7158	tumor suppressor p53-binding protein 1 isoform 1 [Homo sapiens]	S1683	LITSEEERsPAK	213972636	2×TMT6plex [N-Term; K12]; 1×Phospho [S9(100)]	213972636 1×Phospho [S1683(100)]	0.0107021	0.000778694	1	3	4	5032189; 213972634; 213972636	213972636 [1675-1686]	1	1898	S9(Phospho): 100	2.14	1.89	2.12	1.82	2.46	2.07	1.83	1.67	2.19	1.88	2.27	1.82	4.1047	High	0.0003858	0.004961	11	High	0.0004948	1	S9(Phospho): 100	S9;	213972636	NP_001135452.1	ITSEEERsPAKRGRK	No
MARCKS	4082	myristoylated alanine-rich C-kinase substrate [Homo sapiens]	T150	AEDGATPSPSNEtPKK	153070260	3×TMT6plex [N-Term; K15; K16]; 1×Deamidated [N11]; 1×Phospho [T13(100)]	153070260 1×Phospho [T150(100)]	9.88e-05	9e-05	1	1	10	153070260	153070260 [138-153]	1	2397.22	T13(Phospho): 100	3.01	5.35	2.41	1.44	2.15	1.73	2.34	6.27	1.89	1.09	1.94	1.85	5.43298	High	2.03e-05	3.76e-05	23.67	High	7.92e-05	1	T13(Phospho): 100	T13;	153070260	NP_002347.5	TPSPSNEtPKKKKKR	Yes
SF3B1	23451	splicing factor 3B subunit 1 isoform 1 [Homo sapiens]	T267	IWDPTPSHTPAGAAtPGRGDTPGHATPGHGGATSSAR	54112117	1×TMT6plex [N-Term]; 1×Phospho [T15(100)]	54112117 1×Phospho [T267(100)]	4.29e-05	6.55e-05	1	1	17	54112117	54112117 [253-289]	1	3855.81	T15(Phospho): 99.96		1.38	2.06	2.84	2.41	2.21	1.04	1.25	1.55	1.43	2.01	2.11	8.96495	High	0	1.7e-05	38.98	High	1.91e-05	1	T15(Phospho): 99.96	T15;	54112117	NP_036565.2	HTPAGAAtPGRGDTP	Yes
DPYSL3	1809	dihydropyrimidinase-related protein 3 isoform 1 [Homo sapiens]	T628	GGtPAGSAR	308818200	1×TMT6plex [N-Term]; 1×Phospho [T3(100)]	308818200 1×Phospho [T628(100)]	0.012789	0.000778694	1	2	23	308818200; 4503379	308818200 [626-634]	0	1082.52	T3(Phospho): 100	1.59	4.71	3.71	3.6	2.56	2.68	1.21	4.66	2.95	2.89	2.25	2.72	3.3599	High	0.0004774	0.006276	32.08	High	0.0009486	1	T3(Phospho): 100	T3;	308818200	NP_001184223.1	TTTPKGGtPAGSARG	No
PRKCZ	5590	protein kinase C zeta type isoform 1 [Homo sapiens]	T560	QALPPFQPQITDDYGLDNFDTQFTSEPVQLtPDDEDAIK	52486327	2×TMT6plex [N-Term; K39]; 2×Deamidated [Q/N]; 1×Phospho [T31(99.7)]	52486327 1×Phospho [T560(99.7)]	0.00936562	0.000667549	1	3	2	52486327; 75709226; 338968874	52486327 [530-568]	0	4949.32	T31(Phospho): 99.7	3.02	1.79	2.54	1.54	2.3	2.53							3.14361	High	0.0001886	0.001556	12.56	High	0.001047	1	T31(Phospho): 99.7	T31;	52486327	NP_002735.3	TSEPVQLtPDDEDAI	Yes
TPX2	22974	targeting protein for Xklp2 [Homo sapiens]	T369	DPQtPVLQTK	20127519	2×TMT6plex [N-Term; K10]; 1×Phospho [T4(100)]	20127519 1×Phospho [T369(100)]	0.00206028	0.000261096	1	1	4	20127519	20127519 [366-375]	0	1664.9	T4(Phospho): 100	1.39	3.01	3.19	1.78	2.03	2.07	1.41	2.76	3.13	1.42	2.13	2.02	4.30294	High	7.41e-05	0.0004138	29.37	High	0.0003411	1	T4(Phospho): 100	T4;	20127519	NP_036244.2	KICRDPQtPVLQTKH	Yes
SMARCC1	6599	SWI/SNF complex subunit SMARCC1 [Homo sapiens]	T398	DSENtPVK	188536047	2×TMT6plex [N-Term; K8]; 1×Phospho [T5(100)]	188536047 1×Phospho [T398(100)]	0.096128	0.00441309	1	1	5	188536047	188536047 [394-401]	0	1427.72	T5(Phospho): 100	3.06	1.64	3.5	1.62	2.62	2.53							3.4882	High	0.001027	0.01771	12.42	High	0.002323	1	T5(Phospho): 100	T5;	188536047	NP_003065.3	LKKDSENtPVKGGTV	Yes
HIST1H1B	3009	histone H1.5 [Homo sapiens]	T138	KPAGAtPK	4885381	3×TMT6plex [N-Term; K8; K]; 1×Phospho [T6(100)]	4885381 1×Phospho [T138(100)]	0.0274089	0.00146192	1	1	30	4885381	4885381 [133-140]	0	1536.91	T6(Phospho): 100	3.8	0.98	2.56	1.78	2.94	3.12	5.89	1.01	4.34	2.58	5.96	4.92	3.76319	High	0.0009918	0.01711	10.97	High	0.002206	1	T6(Phospho): 100	T6;	4885381	NP_005313.1	AKKPAGAtPKKAKKA	Yes
HIST1H1C	3006	histone H1.2 [Homo sapiens]	T146	KAAGGAtPK	4885375	3×TMT6plex [N-Term; K9; K]; 1×Phospho [T7(100)]	4885375 1×Phospho [T146(100)]	0.0282555	0.00150426	1	1	13	4885375	4885375 [140-148]	1	1567.92	T7(Phospho): 100	2.15	3.59	2.22	1.59	1.32	2.4	1.64	2.5	1.79	1.23	1.28	2.43	4.21182	High	0.0003712	0.004731	11.51	High	0.0004302	1	T7(Phospho): 100	T7;	4885375	NP_005310.1	KKAAGGAtPKKSAKK	Yes
RSL1D1	26156	ribosomal L1 domain-containing protein 1 [Homo sapiens]	T415	ALPASEtPK	118498359	2×TMT6plex [N-Term; K9]; 1×Phospho [T7(100)]	118498359 1×Phospho [T415(100)]	0.0512273	0.00244582	1	1	2	118498359	118498359 [409-417]	0	1451.79	T7(Phospho): 100	1.56	2.08	3.25	1.93	2.4	2.63							3.33245	High	0.0006087	0.008795	22.38	High	0.001097	1	T7(Phospho): 100	T7;	118498359	NP_056474.2	KALPASEtPKAAESE	Yes
MARCKSL1	65108	MARCKS-related protein [Homo sapiens]	T85	GEVPPKEtPK	13491174	3×TMT6plex [N-Term; K6; K10]; 1×Phospho [T8(100)]	13491174 1×Phospho [T85]	0.0415097	0.00203291	1	1	1	13491174	13491174 [78-87]	1	1849.04	T8(Phospho): 100	3.7	3.35	3.33	1.71	1.55	2.49							2.43101	Medium	0.03495	0.5687	6.43	High	0.0004749	1	T8(Phospho): 100	T8;	13491174	NP_075385.1	GEVPPKEtPKKKKKF	Yes
DLGAP4	22839	disks large-associated protein 4 isoform b [Homo sapiens]	T376	ANSWQLVEtPEKR	34335251	2×TMT6plex [N-Term; K12]; 1×Phospho [T9(100)]	34335251 1×Phospho [T376(100)]	0.00146393	0.000236062	1	3	8	34335253; 34335251; 109891938	34335251 [368-380]	1	2096.09	T9(Phospho): 100	2.44	3.13	3.36	1.92	3.24	1.98	1	1.34	1.75	1.31	1.31	1.14	3.65646	High	7.18e-05	0.0003148	18.92	High	0.0001716	1	T9(Phospho): 100	T9;	34335251	NP_892118.1	NSWQLVEtPEKRKEE	No
RANBP2	5903	E3 SUMO-protein ligase RanBP2 [Homo sapiens]	S1456	SGSSFVHQAsFK	150418007	2×TMT6plex [N-Term; K12]; 1×Phospho [S10(100)]	150418007 1×Phospho [S1456(100)]	0.00332841	0.000383028	1	1	4	150418007	150418007 [1447-1458]	0	1819.91	S10(Phospho): 100	1.3	1.93	6.96	2.91	4.5	3.08	1.05	1.44	5.29	2.22	3.36	2.13	4.17334	High	0.0001371	0.001098	17.45	High	0.0002024	1	S10(Phospho): 100	S10;	150418007	NP_006258.3	SSFVHQAsFKFGQGD	Yes
AHNAK	79026	neuroblast differentiation-associated protein AHNAK isoform 1 [Homo sapiens]	S5857	LQGSGVSLAsKK	61743954	3×TMT6plex [N-Term; K11; K12]; 1×Phospho [S10(100)]	61743954 1×Phospho [S5857(100)]	0.000412471	0.000193352	1	1	12	61743954	61743954 [5848-5859]	1	1942.13	S10(Phospho): 100	1.19	1.63	10.78	6.88	2.13	4.58	0.66	0.88	10.8	7.07	1.76	2.95	4.47084	High	5.25e-05	0.0001361	30.54	High	8.36e-05	1	S10(Phospho): 100	S10;	61743954	NP_001611.1	GSGVSLAsKKSRLSS	Yes
NAF1	92345	H/ACA ribonucleoprotein complex non-core subunit NAF1 isoform a [Homo sapiens]	S315	NDQEPPPEALDFsDDEKEK	193083157	3×TMT6plex [N-Term; K17; K19]; 1×Deamidated [N/Q]; 1×Phospho [S13(100)]	193083157 1×Phospho [S315(100)]	0.121642	0.0061297	1	2	3	193083172; 193083157	193083157 [303-321]	1	2971.41	S13(Phospho): 100	1.5	2.43	2.01	1.78	2.3	2.13							2.49815	High	0.001306	0.02318	2.67	High	0.003728	1	S13(Phospho): 100	S13;	193083157	NP_612395.2	PPEALDFsDDEKEKE	Yes
FRMD4A	55691	FERM domain-containing protein 4A [Homo sapiens]	S711	SSsLESQGK	116063562	2×TMT6plex [N-Term; K9]; 1×Phospho [S3(100)]	116063562 1×Phospho [S711(100)]	0.0307296	0.00164118	1	1	8	116063562	116063562 [709-717]	0	1460.74	S3(Phospho): 100	3.28	3.08	5.59	1.36	2.53	3.8	3.24	3.09	5.64	1.45	2.86	3.98	3.34452	High	0.0005707	0.007846	19.61	High	0.002242	1	S3(Phospho): 100	S3;	116063562	NP_060497.3	HFRHRSSsLESQGKL	Yes
APC	324	adenomatous polyposis coli protein isoform b [Homo sapiens]	S2350	TSsPSTASTK	189011566	2×TMT6plex [N-Term; K10]; 1×Phospho [S3(100)]	189011566 1×Phospho [S2350(100)]	0.00488022	0.000429788	1	2	4	306922386; 189011566	189011566 [2348-2357]	0	1504.77	S3(Phospho): 99.98	2.27	1.18	2.42	1.78	3.39	2.44							2.45613	High	0.001323	0.0234	28.11	High	0.0001674	1	S3(Phospho): 99.98	S3;	189011566	NP_001120982.1	SQLPRTSsPSTASTK	No
ERCC6L	54821	DNA excision repair protein ERCC-6-like [Homo sapiens]	S1117	LDDsSEAK	58331268	2×TMT6plex [N-Term; K8]; 1×Phospho [S4(99.6)]	58331268 1×Phospho [S1117(99.6)]	0.0265891	0.00146192	1	1	15	58331268	58331268 [1114-1121]	0	1402.69	S4(Phospho): 99.53	2.89	1.86	2.79	1.02	2.35	2.31	3.19	2.05	3.37	1.51	2.93	2.92	3.46867	High	0.0003605	0.004437	12.16	High	0.004808	1	S4(Phospho): 99.53	S4;	58331268	NP_060139.2	MEERLDDsSEAKGPE	No
SRSF6	6431	serine/arginine-rich splicing factor 6 [Homo sapiens]	S257	SDRGsHSHSR	20127499	1×TMT6plex [N-Term]; 1×Phospho [S5(100)]	20127499 1×Phospho [S257(100)]	0.00949726	0.000765738	1	1	3	20127499	20127499 [253-262]	1	1434.64	S5(Phospho): 100	2.99	1.85	2.07	2.34	3.25	1.93							3.34094	High	0.0001912	0.001575	19.42	High	0.0001961	1	S5(Phospho): 100	S5;	20127499	NP_006266.2	KPKSDRGsHSHSRSR	Yes
FRMD4A	55691	FERM domain-containing protein 4A [Homo sapiens]	S632	SSHSHsSSHK	116063562	2×TMT6plex [N-Term; K10]; 1×Phospho [S6(99.4)]	116063562 1×Phospho [S632(99.4)]	0.00110136	0.000214298	1	1	13	116063562	116063562 [627-636]	0	1618.77	S6(Phospho): 99.36	2.55	10.2	18.1	1.21	2.95	5.68	2.86	9.35	18.51	1.94	3.71	6.03	4.07255	High	5.93e-05	0.0002528	19	High	0.0002679	1	S6(Phospho): 99.36	S6;	116063562	NP_060497.3	KRSSHSHsSSHKRFP	No
FKBP15	23307	FK506-binding protein 15 [Homo sapiens]	S311; S326	DSAAPsPIPGADNLSADPVVsPPTSIPFK	150010552	2×TMT6plex [N-Term; K29]; 2×Phospho [S6(99.9); S21(96.8)]	150010552 2×Phospho [S311(99.9); S326(96.8)]	0.00031238	0.000147488	1	1	3	150010552	150010552 [306-334]	0	3465.7	S6(Phospho): 99.88; S21(Phospho): 96.78	2.04	2.6	2.42	2.43	1.27	2.1							3.73383	High	5.25e-05	0.0001482	13.88	High	7.11e-05	1	S6(Phospho): 99.88; S21(Phospho): 96.78	S6; S21;	150010552	NP_056073.1	SRDSAAPsPIPGADN;LSADPVVsPPTSIPF	Yes;Yes
ASAP1	50807	arf-GAP with SH3 domain, ANK repeat and PH domain-containing protein 1 isoform 1 [Homo sapiens]	S717	QEEIDEsDDDLDDKPSPIKK	46094081	4×TMT6plex [N-Term; K14; K19; K20]; 1×Phospho [S7(100)]	46094081 1×Phospho [S717(100)]	0.000534395	0.000193352	1	2	2	46094081; 351542238	46094081 [711-730]	1	3312.69	S7(Phospho): 100	1.39	6.11	6.48	2.68	5.57	7.3	0.87	3.53	3.45	2.11	3.02	3.88	4.159	High	5.25e-05	0.0001472					S7(Phospho): 100	S7;	46094081	NP_060952.2	RQEEIDEsDDDLDDK	Yes
UBAP2L	9898	ubiquitin-associated protein 2-like isoform a [Homo sapiens]	S609	RYPSSISSsPQK	188497758	2×TMT6plex [N-Term; K12]; 1×Phospho [S9(100)]	188497758 1×Phospho [S609(100)]	0.001854	0.000236062	1	4	19	188497756; 568215065; 568214245; 188497758	188497758 [601-612]	1	1874.98	S9(Phospho): 100	2.57	1.73	2.07	1.49	2.69	3.25	1.05	0.94	1.16	0.9	1.28	2.37	5.3623	High	0.0001603	0.001377	20.1	High	0.0001716	1	S9(Phospho): 100	S9;	188497758	NP_055662.3	YPSSISSsPQKDLTQ	Yes
XRCC6	2547	X-ray repair cross-complementing protein 6 isoform 1 [Homo sapiens]	T455	IMAtPEQVGK	4503841	2×TMT6plex [N-Term; K10]; 1×Phospho [T4(100)]	4503841 1×Phospho [T455(100)]	0.00448969	0.000406702	1	3	20	573014819; 4503841; 573014817	4503841 [452-461]	0	1611.86	T4(Phospho): 100	2.22	1.63	2.29	1.25	2.7	2.19	2.12	1.39	2.37	1.5	2.57	1.99	3.7519	High	0.0001218	0.0007877	29.17	High	0.0002713	1	T4(Phospho): 100	T4;	4503841	NP_001460.1	FTEKIMAtPEQVGKM	Yes
MARCKS	4082	myristoylated alanine-rich C-kinase substrate [Homo sapiens]	S170	LSGFsFK	153070260	2×TMT6plex [N-Term; K7]; 1×Phospho [S2(100)]	153070260 1×Phospho [S167(100)]	0.174405	0.0092304	1	1	13	153070260	153070260 [166-172]	0	1323.71	S5(Phospho): 100	0.49	2.49	4.07	2.79	4.17	1.52	0.58	2.39	3.76	2.4	3.89	1.47	2.38839	High	0.004036	0.08222	23.02	High	0.002607	1	S5(Phospho): 100	S5;	153070260	NP_002347.5	SFKLSGFsFKKNKKE	Yes
EML3	256364	echinoderm microtubule-associated protein-like 3 isoform 3 [Homo sapiens]	S156	RNsSSSSSPSERPR	110227615	1×TMT6plex [N-Term]; 1×Phospho [S3(100)]	110227615 1×Phospho [S156(100)]	0.000891568	0.000214298	1	3	2	110227615; 663854548; 663855005	110227615 [154-167]	1	1842.87	S3(Phospho): 99.99	1.54	1.47	3.36	3.56	6.67	4.3							4.96051	High	5.93e-05	0.0002161	29.25	High	0.0001264	1	S3(Phospho): 99.99	S3;	110227615	NP_694997.2	ADTPRRNsSSSSSPS	Yes
FAM64A	54478	protein FAM64A isoform 2 [Homo sapiens]	S16	sLQHQEQLEDSK	305632783	2×TMT6plex [N-Term; K12]; 1×Phospho [S1(100)]	305632783 1×Phospho [S16(100)]	9.58e-05	9e-05	1	2	2	305632781; 305632783	305632783 [16-27]	0	1979.98	S1(Phospho): 100	2.27	3.79	4.5	1.34	1.96	1.82							5.49572	High	2.03e-05	3.68e-05	31.21	High	7.11e-05	1	S1(Phospho): 100	S1;	305632783	NP_001182157.1	GTSVRRRsLQHQEQL	Yes
TPX2	22974	targeting protein for Xklp2 [Homo sapiens]	S738	SSDQPLTVPVsPK	20127519	2×TMT6plex [N-Term; K13]; 1×Deamidated [Q4]; 1×Phospho [S11(100)]	20127519 1×Phospho [S738(100)]	0.000152535	9e-05	1	1	2	20127519	20127519 [728-740]	0	1894	S11(Phospho): 100	2.39	3.25	2.43	1.78	1.64	1.9							4.40381	High	2.03e-05	5.18e-05	23.1	High	6.51e-05	1	S11(Phospho): 100	S11;	20127519	NP_036244.2	QPLTVPVsPKFSTRF	Yes
MARCKSL1	65108	MARCKS-related protein [Homo sapiens]	S36	ANGQENGHVKsNGDLSPK	13491174	3×TMT6plex [N-Term; K10; K18]; 2×Deamidated [N2; N6; Q/N]; 1×Phospho [S11(100)]	13491174 1×Phospho [S36(100)]	0.00849861	0.000620563	1	1	4	13491174	13491174 [26-43]	1	2621.32	S11(Phospho): 99.98	2.46	4.36	2.64	1.92	1.33	2.28	2.84	2.43	2.21	1.74	1.8	2.07	3.11718	High	0.001144	0.02011	5.95	High	0.001914	1	S11(Phospho): 99.98	S11;	13491174	NP_075385.1	QENGHVKsNGDLSPK	Yes
USP6NL	9712	USP6 N-terminal-like protein isoform 2 [Homo sapiens]	S697	RPHGSTLSVSAsPEK	122937432	2×TMT6plex [N-Term; K15]; 1×Phospho [S12(100)]	122937432 1×Phospho [S697(100)]	0.000127867	9e-05	1	2	4	122937432; 7661864	122937432 [686-700]	0	2091.1	S12(Phospho): 100	2.45	2.74	1.92	1.59	2.27	1.48	1.48	1.9	1.1	1.25	1.37	1.05	5.90855	High	2.03e-05	4.52e-05	26.19	High	6.51e-05	1	S12(Phospho): 100	S12;	122937432	NP_001073960.1	STLSVSAsPEKSYSR	No
DNMT1	1786	DNA (cytosine-5)-methyltransferase 1 isoform b [Homo sapiens]	S154	SDGEAKPEPSPsPR	4503351	2×TMT6plex [N-Term; K6]; 1×Phospho [S12(100)]	4503351 1×Phospho [S154(100)]	0.148655	0.00762175	1	1	4	4503351	4503351 [143-156]	0	1991.98	S12(Phospho): 100	1.53	1.47	2.32	1.4	2.19	2.89	1.76	1.57	2.11	1.74	2.32	2.68	3.09738	High	0.001668	0.03079	3.71	High	0.001732	1	S12(Phospho): 100	S12;	4503351	NP_001370.1	AKPEPSPsPRITRKS	Yes
AKR1B1	231	aldose reductase [Homo sapiens]	S215	GIVVTAYSPLGsPDRPWAKPEDPSLLEDPR	4502049	2×TMT6plex [N-Term; K19]; 1×Phospho [S12(99.9)]	4502049 1×Phospho [S215(99.9)]	0.000245357	0.000147488	1	1	37	4502049	4502049 [204-233]	0	3800.97	S12(Phospho): 99.9	2.16	3.68	1.23	3.83	1.59	2.58	1.53	2.71	1.24	2.52	1.55	1.75	5.57219	High	2.03e-05	7.77e-05	14.78	High	0.000139	1	S12(Phospho): 99.9	S12;	4502049	NP_001619.1	TAYSPLGsPDRPWAK	Yes
ABCF1	23	ATP-binding cassette sub-family F member 1 isoform a [Homo sapiens]	S140	GGNVFAALIQDQsEEEEEEEKHPPKPAKPEK	69354671	5×TMT6plex [N-Term; K21; K25; K28; K31]; 1×Deamidated [Q]; 1×Phospho [S13(100)]	69354671 1×Phospho [S140(100)]	7.11e-05	9e-05	1	2	26	10947135; 69354671	69354671 [128-158]	1	4687.45	S13(Phospho): 100	2.3	2.85	1.48	2.02	1.75	1.84	1.76	2.69	1.38	2.13	1.67	1.52	7.8606	High	2.03e-05	3.35e-05	18.96	High	0.0001196	1	S13(Phospho): 100	S13;	69354671	NP_001020262.1	AALIQDQsEEEEEEE	Yes
PCBP2	5094	poly(rC)-binding protein 2 isoform a [Homo sapiens]	S189	GVTIPYRPKPSSsPVIFAGGQDR	14141168	2×TMT6plex [N-Term; K9]; 1×Phospho [S13(96.3)]	14141168 1×Phospho [S189(96.3)]	0.000181402	0.00012481	1	4	36	14141166; 193083110; 193083108; 14141168	14141168 [177-199]	0	2967.59	S13(Phospho): 96.29	2.68	3.09	1.89	1.12	2.08	1.66	1.87	2.33	1.69	1.28	1.52	1.23	4.95686	High	2.03e-05	5.98e-05	14	High	7.72e-05	1	S13(Phospho): 96.29	S13;	14141168	NP_005007.2	YRPKPSSsPVIFAGG	Yes
NUMA1	4926	nuclear mitotic apparatus protein 1 isoform 1 [Homo sapiens]	S1757; S1760	TQPDGTSVPGEPAsPIsQRLPPK	71361682	2×TMT6plex [N-Term; K23]; 2×Phospho [S14(100); S17(100)]	71361682 2×Phospho [S1757(100); S1760(100)]	0.174405	0.0092304	1	2	2	557440899; 71361682	71361682 [1744-1766]	1	2977.48	S14(Phospho): 99.99; S17(Phospho): 99.99	3.67	0.66	1.9	1.43	2.99	2.1							2.86414	High	0.001935	0.03578	7.09	High	0.004015	1	S14(Phospho): 99.99; S17(Phospho): 99.99	S14; S17;	71361682	NP_006176.2	SVPGEPAsPISQRLP;GEPASPIsQRLPPKV	Yes;Yes
TNS3	64759	tensin-3 [Homo sapiens]	S660	GVGSGPHPPDTQQPsPSK	65288071	2×TMT6plex [N-Term; K18]; 1×Phospho [S15(100)]	65288071 1×Phospho [S660(100)]	4.8e-05	6.55e-05	1	1	21	65288071	65288071 [646-663]	0	2311.15	S15(Phospho): 100	1.81	4.34	1.83	3	1.85	3.04	1.39	4.12	1.45	1.53	1.4	2.09	7.45276	High	1.3e-05	2.15e-05	43.63	High	2.27e-05	1	S15(Phospho): 100	S15;	65288071	NP_073585.8	PPDTQQPsPSKAFKP	Yes
UBAP2L	9898	ubiquitin-associated protein 2-like isoform a [Homo sapiens]	S476; S477	STSAPQMSPGSSDNQSssPQPAQQK	188497758	2×TMT6plex [N-Term; K25]; 2×Deamidated [Q20; Q]; 2×Phospho [S17(77.4); S18(77.4)]	188497758 2×Phospho [S476(77.4); S477(77.4)]	0.170683	0.0089648	1	4	4	188497756; 568215065; 568214245; 188497758	188497758 [460-484]	0	3152.35	S17(Phospho): 77.4; S18(Phospho): 77.4	3.38	2.48	1.9	2.25	2.21	1.85							1.94951	High	0.008396	0.1826	9.86	High	0.006608	1	S17(Phospho): 77.4; S18(Phospho): 77.4	S17; S18;	188497758	NP_055662.3	GSSDNQSsSPQPAQQ;SSDNQSSsPQPAQQK	Yes;Yes
CSNK2B	1460	casein kinase II subunit beta isoform 1 [Homo sapiens]	S209	IHPMAYQLQLQAASNFKsPVK	23503295	3×TMT6plex [N-Term; K17; K21]; 2×Deamidated [Q/N]; 1×Phospho [S18(98.7)]	23503295 1×Phospho [S209(98.7)]	0.000185555	0.00012481	1	2	7	23503295; 538260597	23503295 [192-212]	1	3140.68	S18(Phospho): 98.71	2.46	1.89	2.12	1.22	1.43	2.21							5.68037	High	2.03e-05	6.1e-05	23.14	High	6.51e-05	1	S18(Phospho): 98.71	S18;	23503295	NP_001311.3	QAASNFKsPVKTIR_	Yes
MAP4	4134	microtubule-associated protein 4 isoform 1 [Homo sapiens]	S787	AsPSKPASAPASR	47519639	2×TMT6plex [N-Term; K5]; 1×Phospho [S2(100)]	47519639 1×Phospho [S787(100)]	0.0415097	0.00203291	1	2	8	47519639; 197276600	47519639 [786-798]	0	1764.94	S2(Phospho): 100	2.41	3.49	2.26	1.12	1.37	1.87	1.69	2.81	2.1	0.89	0.93	1.69	3.13612	High	0.001288	0.02276	15.75	High	0.002363	1	S2(Phospho): 100	S2;	47519639	NP_002366.2	KAPEKRAsPSKPASA	Yes
TLN1	7094	talin-1 [Homo sapiens]	S425	SKDHFGLEGDEESTMLEDSVsPK	223029410	3×TMT6plex [N-Term; K2; K23]; 1×Phospho [S21(100)]	223029410 1×Phospho [S425(100)]	4.27e-05	6.55e-05	1	1	13	223029410	223029410 [405-427]	1	3304.59	S21(Phospho): 100	2.54	3.83	1.99	1.21	1.4	2.39	3.59	3.7	2.56	1.28	1.6	2.44	8.96407	High	0	5.94e-06	54.69	High	2.27e-05	1	S21(Phospho): 100	S21;	223029410	NP_006280.3	TMLEDSVsPKKSTVL	Yes
PLEKHA6	22874	pleckstrin homology domain-containing family A member 6 [Homo sapiens]	S777	TKsPTDDEVTPSAVVR	37595548	2×TMT6plex [N-Term; K2]; 1×Phospho [S3(100)]	37595548 1×Phospho [S777(100)]	0.000433372	0.000193352	1	1	14	37595548	37595548 [775-790]	1	2240.16	S3(Phospho): 100	1.27	2.92	0.77	2.12	2.47	1.23	1.25	1.83	1.06	2.26	1.71	3.66	5.38593	High	5.93e-05	0.0001761	31.16	High	0.0001196	1	S3(Phospho): 100	S3;	37595548	NP_055750.2	VVPPRTKsPTDDEVT	Yes
TJAP1	93643	tight junction-associated protein 1 isoform a [Homo sapiens]	S545	KDsLTQAQEQGNLLN	225690487	2×TMT6plex [N-Term; K]; 1×Deamidated [Q]; 1×Phospho [S3(98.6)]	225690487 1×Phospho [S545(98.6)]	0.0138445	0.000848975	1	2	2	225690487; 225690491	225690487 [543-557]	1	2198.11	S3(Phospho): 98.55	1.9	5.89	2.61	2.07	1.97	2.44							3.96988	High	0.0002734	0.002954					S3(Phospho): 98.55	S3;	225690487	NP_001139488.1	HHLHRKDsLTQAQEQ	Yes
CDC25C	995	M-phase inducer phosphatase 3 isoform c [Homo sapiens]	S341	TVsLCDITITQMLEEDSNQGHLIGDFSK	567316256	2×TMT6plex [N-Term; K28]; 1×Deamidated [Q/N]; 1×Carbamidomethyl [C5]; 1×Phospho [S3(98.7)]	567316256 1×Phospho [S341(98.7)]	7.05e-05	9e-05	1	3	10	125625350; 12408658; 567316256	567316256 [339-366]	0	3690.77	S3(Phospho): 98.69	2.67	2.68	2.38	1.15	1.18	2.31	2.59	3.09	2.07	2.01	1.64	2.46	6.26112	High	2.03e-05	3.01e-05	27.64	High	6.51e-05	1	S3(Phospho): 98.69	S3;	567316256	NP_001274512.1	LCLKKTVsLCDITIT	No
PTDSS1	9791	phosphatidylserine synthase 1 isoform 1 [Homo sapiens]	S417	TYsECEDGTYSPEISWHHR	7662647	1×TMT6plex [N-Term]; 1×Carbamidomethyl [C5]; 1×Phospho [S3(99.2)]	7662647 1×Phospho [S417(99.2)]	8.83e-05	9e-05	1	2	6	7662647; 589811544	7662647 [415-433]	0	2663.11	S3(Phospho): 99.22	2.16	2.34	1.8	1.53	1.89	2.07	0.51	0.43	0.56	0.69	0.75	0.64	5.56945	High	2.03e-05	3.49e-05	56.36	High	5.23e-05	1	S3(Phospho): 99.22	S3;	7662647	NP_055569.1	GHREKTYsECEDGTY	Yes
ZDHHC5	25921	palmitoyltransferase ZDHHC5 [Homo sapiens]	S621	GVGsPEPGPTAPYLGR	41152072	1×TMT6plex [N-Term]; 1×Phospho [S4(100)]	41152072 1×Phospho [S621(100)]	0.00861685	0.00064256	1	1	4	41152072	41152072 [618-633]	0	1863.92	S4(Phospho): 100	3.07	3.58	1.66	2.68	1.48	2.41	2.13	2.53	1.11	1.81	1.02	1.77	3.39232	High	0.0001764	0.001438	22.38	High	0.0003204	1	S4(Phospho): 100	S4;	41152072	NP_056272.2	LRGRGVGsPEPGPTA	Yes
DYNC1LI2	1783	cytoplasmic dynein 1 light intermediate chain 2 isoform 1 [Homo sapiens]	S443; S446	KTGsPGsPGAGGVQSTAK	5453634	3×TMT6plex [N-Term; K18; K]; 2×Phospho [S4(100); S7(100)]	5453634 2×Phospho [S443(100); S446(100)]	6.64e-05	6.55e-05	1	2	7	5453634; 555290083	5453634 [440-457]	1	2434.23	S4(Phospho): 99.98; S7(Phospho): 100	2.23	1.83	2.05	1.63	2.06	2	2.43	1.84	2.01	1.69	2.01	2.22	6.048	High	1.3e-05	2.88e-05	47.91	High	2.27e-05	1	S4(Phospho): 99.98; S7(Phospho): 100	S4; S7;	5453634	NP_006132.1	LLSKKTGsPGSPGAG;KKTGSPGsPGAGGVQ	Yes;Yes
FLYWCH2	114984	FLYWCH family member 2 [Homo sapiens]	S21	ASQEPsPKPGTEVIPAAPR	34147540	2×TMT6plex [N-Term; K8]; 1×Phospho [S6(100)]	34147540 1×Phospho [S21(100)]	0.000507004	0.000193352	1	1	5	34147540	34147540 [16-34]	0	2470.31	S6(Phospho): 100	3.17	1.88	2.31	2.32	1.98	1.68	2.63	1.53	1.73	2.07	1.66	1.48	4.20917	High	5.25e-05	0.0001464	4.02	High	8.27e-05	1	S6(Phospho): 100	S6;	34147540	NP_612448.1	VKASQEPsPKPGTEV	Yes
MARCKS	4082	myristoylated alanine-rich C-kinase substrate [Homo sapiens]	S46	VNGDAsPAAAESGAK	153070260	2×TMT6plex [N-Term; K15]; 1×Deamidated [N2]; 1×Phospho [S6(100)]	153070260 1×Phospho [S46(100)]	6.46e-05	6.55e-05	1	1	42	153070260	153070260 [41-55]	0	1883.92	S6(Phospho): 100	1.8	3.17	2.42	1.49	2.69	2.4	2.11	3.13	2.41	1.43	2.48	2.51	6.5823	High	2.03e-05	3.13e-05	45.98	High	8.27e-05	1	S6(Phospho): 100	S6;	153070260	NP_002347.5	VKVNGDAsPAAAESG	Yes
MISP	126353	mitotic interactor and substrate of PLK1 [Homo sapiens]	S214	GAPHSsPAR	27735067	1×TMT6plex [N-Term]; 1×Phospho [S6(99.2)]	27735067 1×Phospho [S214(99.2)]	0.0768468	0.0036087	1	1	6	27735067	27735067 [209-217]	0	1188.57	S6(Phospho): 99.22	0.97	0.91	1.13	2.62	4.7	2.11	0.57	0.59	0.74	1.94	4.32	1.55	2.31102	High	0.002594	0.05054	19.78	High	0.001616	1	S6(Phospho): 99.22	S6;	27735067	NP_775752.1	NKGAPHSsPARGTPA	Yes
SMARCAD1	56916	SWI/SNF-related matrix-associated actin-dependent regulator of chromatin subfamily A containing DEAD/H box 1 isoform a [Homo sapiens]	T137	DTVIIVSEPSEDEESQGLPtMAR	190358532	1×TMT6plex [N-Term]; 1×Deamidated [Q16]; 2×Phospho [T20(97.1); S/T]	190358532 2×Phospho [T137(97.1); S/T]	0.110274	0.00546002	1	2	2	190358532; 190358534	190358532 [118-140]	0	2893.27	S7(Phospho): 33.85; S10(Phospho): 33.85; S15(Phospho): 35.19; T20(Phospho): 97.11	2.44	1.57	2.51	1.65	1.34	2.16							0.979564	High	0.001185	0.02072					S7(Phospho): 33.85; S10(Phospho): 33.85; S15(Phospho): 35.19; T20(Phospho): 97.11	T20;	190358532	NP_001121901.1	EESQGLPtMARRNDD	Yes
FANCI	55215	Fanconi anemia group I protein isoform 1 [Homo sapiens]	S409	TIETSPsLSR	164607124	1×TMT6plex [N-Term]; 1×Phospho [S7(98.6)]	164607124 1×Phospho [S409(98.6)]	0.0500416	0.00235664	1	2	6	164607124; 82830440	164607124 [403-412]	0	1399.7	S7(Phospho): 99.98	1.78	1.41	2.89	1.65	3.11	2.06							2.94638	High	0.001452	0.02633	22.34	High	0.001539	1	S7(Phospho): 99.98	S7;	164607124	NP_001106849.1	KTIETSPsLSRMPNQ	No
ABCF1	23	ATP-binding cassette sub-family F member 1 isoform a [Homo sapiens]	S109	KLSVPTsDEEDEVPAPKPR	69354671	3×TMT6plex [N-Term; K17; K]; 1×Phospho [S7(100)]	69354671 1×Phospho [S109(100)]	9.98e-05	9e-05	1	2	26	10947135; 69354671	69354671 [103-121]	1	2861.53	S7(Phospho): 99.99	1.99	3.5	1.7	1.72	2.25	2.02	1.56	2.77	1.41	2	1.69	1.5	5.38626	High	2.03e-05	4.82e-05	24.94	High	5.72e-05	1	S7(Phospho): 99.99	S7;	69354671	NP_001020262.1	KKLSVPTsDEEDEVP	Yes
TPD52L2	7165	tumor protein D54 isoform a [Homo sapiens]	S189	NSATFKsFEDR	40805864	2×TMT6plex [N-Term; K6]; 1×Deamidated [N1]; 1×Phospho [S7(99)]	40805864 1×Phospho [S189(100)]	0.0642476	0.00298591	1	8	2	345197264; 40805860; 40805866; 40805864; 345197262; 40805868; 40805862; 40805870	40805864 [183-193]	1	1840.89	S7(Phospho): 99.99	1.25	0.85	3.39	2.09	2.15	2.26							2.84263	High	0.0007506	0.01127					S7(Phospho): 99.99	S7;	40805864	NP_955392.1	RNSATFKsFEDRVGT	No
H1FX	8971	histone H1x [Homo sapiens]	S31	AGGSAALsPSK	5174449	2×TMT6plex [N-Term; K11]; 1×Phospho [S8(100)]	5174449 1×Phospho [S31(100)]	0.000835437	0.000193352	1	1	40	5174449	5174449 [24-34]	0	1483.79	S8(Phospho): 100	2.64	1.6	3.01	1.9	2.34	1.68	2.57	1.39	3.3	1.52	1.89	1.22	4.61216	High	0.0001524	0.001286	49.84	High	8.27e-05	1	S8(Phospho): 100	S8;	5174449	NP_006017.1	AGGSAALsPSKKRKN	Yes
GTPBP1	9567	GTP-binding protein 1 [Homo sapiens]	S580	LLQTTNNsPMNSKPQQIK	82546879	3×TMT6plex [N-Term; K13; K18]; 1×Phospho [S8(100)]	82546879 1×Phospho [S580(100)]	5.75e-05	6.55e-05	1	1	9	82546879	82546879 [573-590]	0	2809.53	S8(Phospho): 100	1.92	1.69	2.23	1.59	2.82	2.47	1.76	1.66	2.14	1.33	2.5	2.54	6.84676	High	1.3e-05	2.56e-05	25.7	High	7.92e-05	1	S8(Phospho): 100	S8;	82546879	NP_004277.2	LLQTTNNsPMNSKPQ	Yes
HNRNPK	3190	heterogeneous nuclear ribonucleoprotein K isoform a [Homo sapiens]	S216	IILDLISEsPIKGR	14165437	2×TMT6plex [N-Term; K12]; 1×Phospho [S9(100)]	14165437 1×Phospho [S216(100)]	0.00469535	0.000406702	1	2	8	14165437; 14165435	14165437 [208-221]	1	2092.22	S9(Phospho): 100	2.93	2.5	2.86	1.82	1.76	1.75	2.07	1.88	1.93	1.39	1.03	1.18	3.62802	High	0.0001218	0.0008177	24.75	High	0.0002291	1	S9(Phospho): 100	S9;	14165437	NP_112553.1	ILDLISEsPIKGRAQ	Yes
ATRX	546	transcriptional regulator ATRX isoform 1 [Homo sapiens]	S1527	EVIEIEDAsPTKCPITTK	530788276	3×TMT6plex [N-Term; K12; K18]; 1×Carbamidomethyl [C13]; 1×Phospho [S9(100)]	530788276 1×Phospho [S1527(100)]	8.94e-05	9e-05	1	2	4	530788278; 530788276	530788276 [1519-1536]	1	2798.49	S9(Phospho): 100	2.5	2.39	2.63	1.67	1.91	1.71							5.46767	High	2.03e-05	3.52e-05	36.51	High	5.72e-05	1	S9(Phospho): 100	S9;	530788276	NP_000480.3	VIEIEDAsPTKCPIT	Yes
CDCA8	55143	borealin [Homo sapiens]	S219	IYNISGNGsPLADSK	379056369	2×TMT6plex [N-Term; K15]; 1×Deamidated [N]; 1×Phospho [S9(100)]	379056369 1×Phospho [S219(100)]	8.86e-05	9e-05	1	1	18	379056369	379056369 [211-225]	0	2075.05	S9(Phospho): 100	2.03	1.85	2.14	1.3	2.04	1.99	3.02	2.46	2.84	1.85	2.82	2.61	5.35174	High	2.03e-05	4.22e-05	64.07	High	2.27e-05	1	S9(Phospho): 100	S9;	379056369	NP_001243804.1	YNISGNGsPLADSKE	Yes
TPX2	22974	targeting protein for Xklp2 [Homo sapiens]	S486	VLPITVPKsPAFALK	20127519	3×TMT6plex [N-Term; K8; K15]; 1×Phospho [S9(100)]	20127519 1×Phospho [S486(100)]	0.128189	0.00645783	1	1	4	20127519	20127519 [478-492]	1	2348.43	S9(Phospho): 100	1.88	5.97	4.28	1.92	2.05	1.81	1.17	3.89	2.26	1.7	1.64	1.4	2.89569	High	0.001407	0.02545	5.91	High	0.001732	1	S9(Phospho): 100	S9;	20127519	NP_036244.2	LPITVPKsPAFALKN	Yes
KIF15	56992	kinesin-like protein KIF15 [Homo sapiens]	S568	SDKNQQGFsPK	9910266	3×TMT6plex [N-Term; K3; K11]; 1×Phospho [S9(100)]	9910266 1×Phospho [S568(100)]	0.0040318	0.000383028	1	1	8	9910266	9910266 [560-570]	1	2003.06	S9(Phospho): 100	1.71	1.18	3	1.62	2.19	3.46	1.95	1.31	3.6	1.96	2.32	4.06	4.21007	High	0.0001218	0.0007147	25.68	High	0.0002024	1	S9(Phospho): 100	S9;	9910266	NP_064627.1	DKNQQGFsPKAQKEP	Yes
TBC1D1	23216	TBC1 domain family member 1 isoform 1 [Homo sapiens]	T652	ANHLGDSGGtPVK	50658061	2×TMT6plex [N-Term; K13]; 1×Phospho [T10(99)]	50658061 1×Phospho [T652(99)]	0.0153266	0.000919342	1	2	2	50658061; 359807035	50658061 [643-655]	0	1790.92	T10(Phospho): 98.95	2.15	2.05	2.47	1.67	1.99	1.89							1.93731	High	0.0002654	0.002902	5.59	High	0.0002407	1	T10(Phospho): 98.95	T10;	50658061	NP_055988.2	HLGDSGGtPVKTRRH	Yes
SAMHD1	25939	deoxynucleoside triphosphate triphosphohydrolase SAMHD1 [Homo sapiens]	T592	NFTKPQDGDVIAPLItPQKK	38016914	4×TMT6plex [N-Term; K4; K19; K20]; 1×Deamidated [Q/N]; 1×Phospho [T16(100)]	38016914 1×Phospho [T592(100)]	0.00440472	0.000406702	1	1	7	38016914	38016914 [577-596]	1	3207.82	T16(Phospho): 100	1.15	2.24	3.54	2.56	1.19	3.01	1.07	2.51	3.62	2.25	1.45	4.06	4.27347	High	0.0001561	0.001321	8.38	High	0.0004302	1	T16(Phospho): 100	T16;	38016914	NP_056289.2	DVIAPLItPQKKEWN	Yes
RAD54L2	23132	helicase ARIP4 [Homo sapiens]	T1260	KLAtPPAAQESSR	168823443	2×TMT6plex [N-Term; K]; 1×Phospho [T4(100)]	168823443 1×Phospho [T1260(100)]	0.0524415	0.00246555	1	1	4	168823443	168823443 [1257-1269]	1	1894.02	T4(Phospho): 100	2.23	1.85	1.9	1.3	2.71	2.06	1.37	1.33	1.24	1.05	0.95	1.58	3.21371	High	0.0006194	0.009014	18.8	High	0.0008253	1	T4(Phospho): 100	T4;	168823443	NP_055921.2	GHKRKLAtPPAAQES	Yes
MKI67	4288	antigen KI-67 isoform 1 [Homo sapiens]	T1335	RPQtPKEEAQALEDLTGFK	103472005	3×TMT6plex [N-Term; K6; K19]; 2×Deamidated [Q3; Q10]; 1×Phospho [T4(100)]	103472005 1×Phospho [T1335(100)]	0.035284	0.00185874	1	2	2	103472005; 225543215	103472005 [1332-1350]	1	2927.54	T4(Phospho): 100	2.05	1.45	2.2	1.39	2.01	1.23							3.59208	High	0.0004557	0.005947	11.3	High	0.0004087	1	T4(Phospho): 100	T4;	103472005	NP_002408.3	GSKRRPQtPKEEAQA	Yes
RB1	5925	retinoblastoma-associated protein [Homo sapiens]	T821	ISEGLPtPTK	108773787	2×TMT6plex [N-Term; K10]; 1×Phospho [T7(100)]	108773787 1×Phospho [T821(100)]	0.0145651	0.000870764	1	1	11	108773787	108773787 [815-824]	0	1580.87	T7(Phospho): 100	5.1	1.39	2.12	1.98	2.16	4.14	4.96	1.56	2.09	2	2.25	3.83	2.94469	High	0.0002694	0.00293	23.42	High	0.0002679	1	T7(Phospho): 100	T7;	108773787	NP_000312.2	KISEGLPtPTKMTPR	Yes
STMN1	3925	stathmin isoform a [Homo sapiens]	S63	sHEAEVLK	5031851	2×TMT6plex [N-Term; K8]; 1×Phospho [S1(100)]	5031851 1×Phospho [S63(100)]	0.000256583	0.000147488	1	2	12	224451142; 5031851	5031851 [63-70]	0	1450.77	S1(Phospho): 100	2.26	1.18	2.14	1.41	1.71	2.28	2.09	1.48	2.4	1.28	1.66	2.64	5.34463	High	2.03e-05	8.09e-05	26.92	High	8.36e-05	1	S1(Phospho): 100	S1;	5031851	NP_005554.1	AAEERRKsHEAEVLK	Yes
SH2B3	10019	SH2B adapter protein 3 isoform 1 [Homo sapiens]	S150	sAGELPAAHTAAAPGTPGEAAETPARPGLAK	4885455	2×TMT6plex [N-Term; K31]; 1×Phospho [S1(100)]	4885455 1×Phospho [S150(100)]	4.27e-05	6.55e-05	1	1	2	4885455	4885455 [150-180]	0	3405.76	S1(Phospho): 100	2.2	2.67	2.48	1.12	0.88	3.69							8.43444	High	0	1.1e-05	36.84	High	2.27e-05	1	S1(Phospho): 100	S1;	4885455	NP_005466.1	RHIFRRRsAGELPAA	Yes
RPL30	6156	60S ribosomal protein L30 [Homo sapiens]	S10	sLESINSR	4506631	1×TMT6plex [N-Term]; 1×Phospho [S1(100)]	4506631 1×Phospho [S10(100)]	0.0202838	0.0012448	1	1	3	4506631	4506631 [10-17]	0	1214.6	S1(Phospho): 100	1.94	1.45	2.04	1.71	2.57	2.12	1.47	1.06	1.27	0.9	1.39	1.58	2.7639	High	0.0003194	0.003345	14.27	High	0.002199	1	S1(Phospho): 100	S1;	4506631	NP_000980.1	AAKKTKKsLESINSR	Yes
LIMCH1	22998	LIM and calponin homology domains-containing protein 1 isoform a [Homo sapiens]	S718	sPEPEATLTFPFLDK	163310741	2×TMT6plex [N-Term; K15]; 1×Phospho [S1(100)]	163310741 1×Phospho [S718(100)]	6.04e-05	6.55e-05	1	7	33	163310747; 163310749; 163310743; 163310741; 574285787; 574285545; 163310745	163310741 [718-732]	0	2230.14	S1(Phospho): 100	1.32	3.67	1.26	2.79	4.35	1.27	1.72	5.25	2.19	5.28	6.94	2.21	5.48311	High	1.3e-05	2.67e-05	30.1	High	0.0001165	1	S1(Phospho): 100	S1;	163310741	NP_055803.2	QKVVKPKsPEPEATL	Yes
LIMCH1	22998	LIM and calponin homology domains-containing protein 1 isoform a [Homo sapiens]	S377	sVSQDLIK	163310741	2×TMT6plex [N-Term; K8]; 1×Phospho [S1(100)]	163310741 1×Phospho [S377(100)]	0.00879764	0.00064256	1	7	5	163310747; 163310749; 163310743; 163310741; 574285787; 574285545; 163310745	163310741 [377-384]	0	1427.79	S1(Phospho): 100	1.25	3.34	1.53	3.05	5.94	1.45	1.13	3.07	1.3	2.57	5.13	1.22	3.5038	High	0.0001764	0.001468	34.2	High	0.006524	1	S1(Phospho): 100	S1;	163310741	NP_055803.2	RWKSRRRsVSQDLIK	Yes
BICC1	80114	protein bicaudal C homolog 1 [Homo sapiens]	S633	sPSHSGNAGDLK	122937472	2×TMT6plex [N-Term; K12]; 1×Phospho [S1(100)]	122937472 1×Phospho [S633(100)]	0.000178874	0.00012481	1	1	9	122937472	122937472 [633-644]	0	1707.85	S1(Phospho): 99.99	1.35	2.35	2.88	1.71	1.32	3.29	0.92	1.08	1.89	1.23	1.34	3.5	6.21699	High	2.03e-05	5.92e-05	32.25	High	8.36e-05	1	S1(Phospho): 99.99	S1;	122937472	NP_001073981.1	VEVGMPRsPSHSGNA	Yes
MAP1B	4131	microtubule-associated protein 1B [Homo sapiens]	S1779	VQSLEGEKLsPK	153945728	3×TMT6plex [N-Term; K8; K12]; 1×Phospho [S10(100)]	153945728 1×Phospho [S1779(100)]	0.000448659	0.000193352	1	1	7	153945728	153945728 [1770-1781]	1	2082.18	S10(Phospho): 100	4.39	9.15	4.14	1.12	0.81	2.48	5.07	11.22	5.52	0.73	0.41	3.15	5.41915	High	7.41e-05	0.0003495	25.04	High	0.002219	1	S10(Phospho): 100	S10;	153945728	NP_005900.2	SLEGEKLsPKSDISP	Yes
IGF2R	3482	cation-independent mannose-6-phosphate receptor precursor [Homo sapiens]	S2409	ALSSLHGDDQDsEDEVLTIPEVK	119964726	2×TMT6plex [N-Term; K23]; 1×Phospho [S12(100)]	119964726 1×Phospho [S2409(100)]	4.27e-05	6.55e-05	1	1	35	119964726	119964726 [2398-2420]	0	3035.49	S12(Phospho): 100	3	3.94	1.94	1.38	1.11	2.31	2.76	3.45	1.77	1.38	1.12	2.25	7.45468	High	0	1.17e-05	62.05	High	1.91e-05	1	S12(Phospho): 100	S12;	119964726	NP_000867.2	LHGDDQDsEDEVLTI	Yes
CSRP1	1465	cysteine and glycine-rich protein 1 isoform 1 [Homo sapiens]	S192	GFGFGQGAGALVHsE	4758086	1×TMT6plex [N-Term]; 1×Phospho [S14(100)]	4758086 1×Phospho [S192(100)]	5.25e-05	6.55e-05	1	2	14	4758086; 302191611	4758086 [179-193]	0	1742.81	S14(Phospho): 100	1.01	2.1	2.26	1.9	1.42	2.31	1.12	1.55	1.84	1.15	0.99	1.13	5.93501	High	1.3e-05	2.36e-05	46.13	High	1.91e-05	1	S14(Phospho): 100	S14;	4758086	NP_004069.1	GAGALVHsE_	Yes
EIF4B	1975	eukaryotic translation initiation factor 4B isoform 1 [Homo sapiens]	S464	SLENETLNKEEDCHsPTSKPPKPDQPLK	664805999	5×TMT6plex [N-Term; K9; K19; K22; K28]; 2×Deamidated [N8; N/Q]; 1×Carbamidomethyl [C13]; 1×Phospho [S15(99.8)]	664805999 1×Phospho [S464(99.8)]	0.00559556	0.000453644	1	2	8	664805999; 50053795	664805999 [450-477]	1	4446.31	S15(Phospho): 99.82	1.72	1.42	1.76	2.08	2.41	2.01	1.34	1.13	1.73	0.97	2.5	2.17	4.78733	High	0.0001985	0.001819					S15(Phospho): 99.82	S15;	664805999	NP_001287750.1	NKEEDCHsPTSKPPK	No
DDX21	9188	nucleolar RNA helicase 2 isoform 1 [Homo sapiens]	S168; S171	NGFPHPEPDCNPSEAAsEEsNSEIEQEIPVEQK	50659095	2×TMT6plex [N-Term; K33]; 1×Deamidated [N1; N]; 1×Carbamidomethyl [C10]; 2×Phospho [S17(100); S20(97.2)]	50659095 2×Phospho [S168(100); S171(97.2)]	6e-05	6.55e-05	1	2	24	50659095; 379317177	50659095 [152-184]	0	4313.85	S17(Phospho): 100; S20(Phospho): 97.16	2.08	1.48	2.05	1.4	2.27	1.98	1.67	1.52	2	1.67	1.89	1.42	5.69365	High	1.3e-05	2.87e-05	39.31	High	5.72e-05	1	S17(Phospho): 100; S20(Phospho): 97.16	S17; S20;	50659095	NP_004719.2	CNPSEAAsEESNSEI;SEAASEEsNSEIEQE	Yes;Yes
TLN1	7094	talin-1 [Homo sapiens]	S425	DHFGLEGDEESTMLEDSVsPK	223029410	2×TMT6plex [N-Term; K21]; 1×Phospho [S19(100)]	223029410 1×Phospho [S425(100)]	4.27e-05	6.55e-05	1	1	10	223029410	223029410 [407-427]	0	2860.3	S19(Phospho): 99.98	2.22	2.58	1.95	1.5	1.69	2.11	1.42	1.51	1.17	1.17	1.16	1.22	6.96131	High	0	1.3e-05	44.13	High	1.91e-05	1	S19(Phospho): 99.98	S19;	223029410	NP_006280.3	TMLEDSVsPKKSTVL	Yes
PTK2	5747	focal adhesion kinase 1 isoform b [Homo sapiens]	S865	GsIDREDGSLQGPIGNQHIYQPVGKPDPAAPPK	27886593	3×TMT6plex [N-Term; K25; K33]; 1×Phospho [S2(100)]	27886593 1×Phospho [S865(100)]	5.38e-05	6.55e-05	1	2	11	24476013; 27886593	27886593 [864-896]	1	4206.2	S2(Phospho): 100	3.31	1.37	2.58	3.2	4.55	1.57	2.26	0.92	1.64	1.76	2.73	1.2	8.25574	High	1.3e-05	2.83e-05	16.08	High	0.0001165	1	S2(Phospho): 100	S2;	27886593	NP_005598.3	DVRLSRGsIDREDGS	No
NAV3	89795	neuron navigator 3 isoform 1 [Homo sapiens]	S1190	SsPVTVNQTDKEK	557636663	3×TMT6plex [N-Term; K11; K13]; 1×Phospho [S2(100)]	557636663 1×Phospho [S1190(100)]	0.131091	0.00658153	1	2	1	120953251; 557636663	557636663 [1189-1201]	1	2200.18	S2(Phospho): 99.98	3.55	2.1	3.01	1.02	1.12	2.18							2.50126	High	0.001401	0.02528					S2(Phospho): 99.98	S2;	557636663	NP_001019554.1	KIGSGRSsPVTVNQT	Yes
BICC1	80114	protein bicaudal C homolog 1 [Homo sapiens]	S799	ANHVSYKPTMTTTYEGSSMSLsR	122937472	2×TMT6plex [N-Term; K7]; 1×Phospho [S22(100)]	122937472 1×Phospho [S799(100)]	6.73e-05	6.55e-05	1	1	16	122937472	122937472 [778-800]	0	3086.47	S22(Phospho): 99.98	1.31	2.01	2.92	1.61	0.7	2.56	1.27	2.03	2.45	1.5	1.09	1.93	6.39459	High	1.3e-05	2.91e-05	28.91	High	6.51e-05	1	S22(Phospho): 99.98	S22;	122937472	NP_001073981.1	EGSSMSLsRSNSREH	Yes
SNTB2	6645	beta-2-syntrophin [Homo sapiens]	S233	KPSLVSDLPWEGAAPQSPSFSGSEDSGsPK	5803177	3×TMT6plex [N-Term; K30; K]; 1×Deamidated [Q16]; 1×Phospho [S28(100)]	5803177 1×Phospho [S233(100)]	5.67e-05	6.55e-05	1	1	9	5803177	5803177 [206-235]	0	3812.89	S28(Phospho): 100	2.56	2.16	1.99	1.84	1.83	2.45	0.9	1.06	0.72	1.13	0.78	0.77	6.21849	High	1.3e-05	2.53e-05	50.09	High	2.27e-05	1	S28(Phospho): 100	S28;	5803177	NP_006741.1	SGSEDSGsPKHQNST	Yes
PDE8A	5151	high affinity cAMP-specific and IBMX-insensitive 3',5'-cyclic phosphodiesterase 8A isoform 1 [Homo sapiens]	S457	RLsGNEYVLSTK	27734721	2×TMT6plex [N-Term; K12]; 1×Phospho [S3(100)]	27734721 1×Phospho [S457(100)]	0.000943468	0.000214298	1	3	4	27734721; 341823698; 47132537	27734721 [455-466]	1	1905.02	S3(Phospho): 100	1.72	2.27	1.31	3.5	3.1	2.11	1.7	1.89	1.2	2.52	2.24	1.5	4.63822	High	5.93e-05	0.0002251	17.9	High	0.0002223	1	S3(Phospho): 100	S3;	27734721	NP_002596.1	SDGLRRLsGNEYVLS	Yes
ANLN	54443	actin-binding protein anillin isoform 1 [Homo sapiens]	S182	AAsPPRPLLSNASATPVGR	31657094	1×TMT6plex [N-Term]; 1×Phospho [S3(100)]	31657094 1×Phospho [S182(100)]	0.00296779	0.00036439	1	3	4	546231404; 31657094; 546231137	31657094 [180-198]	0	2171.15	S3(Phospho): 100	1.04	0.82	2.57	2.97	2.06	2.99	0.69	0.61	1.64	1.58	1.22	1.12	3.46042	High	0.0001218	0.0005542	10.26	High	0.0001709	1	S3(Phospho): 100	S3;	31657094	NP_061155.2	PSEEKAAsPPRPLLS	Yes
MAP1B	4131	microtubule-associated protein 1B [Homo sapiens]	S1396; S1400	VLsPLRsPPLIGSESAYESFLSADDK	153945728	2×TMT6plex [N-Term; K26]; 2×Phospho [S3(100); S7(100)]	153945728 2×Phospho [S1396(100); S1400(100)]	4.33e-05	6.55e-05	1	1	79	153945728	153945728 [1394-1419]	1	3396.68	S3(Phospho): 100; S7(Phospho): 100	6.12	29.81	11.06	1.46	1.32	2.65	4.23	13.17	4.75	1.43	1.1	3.31	9.68608	High	1.3e-05	1.88e-05	39.68	High	0.0001475	1	S3(Phospho): 100; S7(Phospho): 100	S3; S7;	153945728	NP_005900.2	SPIEKVLsPLRSPPL;KVLSPLRsPPLIGSE	Yes;Yes
C1orf226	400793	uncharacterized protein C1orf226 isoform 1 [Homo sapiens]	S265	RAsSPSLIER	207028635	1×TMT6plex [N-Term]; 1×Phospho [S3(100)]	207028635 1×Phospho [S265(100)]	0.0263883	0.00146192	1	2	2	207028635; 145977194	207028635 [263-272]	1	1424.75	S3(Phospho): 99.99	1.91	2.48	2.19	0.99	2.63	1.51							3.26101	High	0.0003605	0.004389	7.23	High	0.001274	1	S3(Phospho): 99.99	S3;	207028635	NP_001128712.1	MTECRRAsSPSLIER	No
EIF4G3	8672	eukaryotic translation initiation factor 4 gamma 3 isoform 1 [Homo sapiens]	S1192	GGsSKDLLDNQSQEEQR	311771714	2×TMT6plex [N-Term; K5]; 1×Phospho [S3(100)]	311771714 1×Phospho [S1192(100)]	0.00016036	9e-05	1	3	7	10092601; 311771716; 311771714	311771714 [1190-1206]	1	2429.17	S3(Phospho): 99.99	1.47	1.13	3.06	2.05	1.9	2.56	1.26	0.82	2.4	1.57	1.46	2.06	4.99921	High	2.03e-05	5.4e-05	16.44	High	9.32e-05	1	S3(Phospho): 99.99	S3;	311771714	NP_001185730.1	NTFMRGGsSKDLLDN	No
AKAP12	9590	A-kinase anchor protein 12 isoform 1 [Homo sapiens]	S696; S698	RGsSsDEEGGPK	21493022	2×TMT6plex [N-Term; K12]; 2×Phospho [S3(100); S5(100)]	21493022 2×Phospho [S696(100); S698(100)]	0.000590178	0.000193352	1	2	13	21493022; 21493024	21493022 [694-705]	1	1823.8	S3(Phospho): 99.99; S5(Phospho): 100	1.15	2.08	6.66	5.74	0.76	4.59	1.47	2.46	6.63	5.84	0.98	4.2	6.60831	High	5.25e-05	0.0001587	55.87	High	0.0001716	1	S3(Phospho): 99.99; S5(Phospho): 100	S3; S5;	21493022	NP_005091.2	KKRARRGsSSDEEGG;RARRGSSsDEEGGPK	Yes;Yes
VIM	7431	vimentin [Homo sapiens]	S325	QVQsLTCEVDALK	62414289	2×TMT6plex [N-Term; K13]; 1×Carbamidomethyl [C7]; 1×Phospho [S4(100)]	62414289 1×Phospho [S325(100)]	0.000891568	0.000214298	1	1	2	62414289	62414289 [322-334]	0	2029.04	S4(Phospho): 100	3.2	2.1	2.62	0.95	0.98	3.99							4.68818	High	5.93e-05	0.0002162	39.19	High	0.0001301	1	S4(Phospho): 100	S4;	62414289	NP_003371.2	EYRRQVQsLTCEVDA	Yes
LIMCH1	22998	LIM and calponin homology domains-containing protein 1 isoform a [Homo sapiens]	S217	QTPsPDVVLR	163310741	1×TMT6plex [N-Term]; 1×Phospho [S4(100)]	163310741 1×Phospho [S217(100)]	0.0166116	0.00101353	1	7	10	163310747; 163310749; 163310743; 163310741; 574285787; 574285545; 163310745	163310741 [214-223]	0	1420.74	S4(Phospho): 100	2.48	2.5	1.96	2.25	1.82	1.65	1.54	1.77	1.19	1.71	1.63	1.49	3.08432	High	0.0006437	0.009698	16.13	High	0.0003887	1	S4(Phospho): 100	S4;	163310741	NP_055803.2	SRSRQTPsPDVVLRG	Yes
EEF2	1938	elongation factor 2 [Homo sapiens]	S279	SATsPEGK	4503483	2×TMT6plex [N-Term; K8]; 1×Phospho [S4(100)]	4503483 1×Phospho [S279(100)]	0.144346	0.00728748	1	1	5	4503483	4503483 [276-283]	0	1314.67	S4(Phospho): 100	1.98	2.38	1.97	1.82	2.08	2.69	0.9	0.91	1.16	1.47	0.95	1.42	2.99384	High	0.007063	0.1485	12.11	High	0.002683	1	S4(Phospho): 100	S4;	4503483	NP_001952.1	KFSKSATsPEGKKLP	No
MAP1B	4131	microtubule-associated protein 1B [Homo sapiens]	S831; S832	SLMssPEDLTK	153945728	2×TMT6plex [N-Term; K11]; 2×Phospho [S4(100); S5(100)]	153945728 2×Phospho [S831(100); S832(100)]	0.00413451	0.000383028	1	1	34	153945728	153945728 [828-838]	0	1825.85	S4(Phospho): 100; S5(Phospho): 100	2.66	7.49	2.34	1.58	0.94	2.72	2.8	7.93	2.52	1.22	0.91	2.29	4.83763	High	0.0001251	0.0009148	37.94	High	0.0004302	1	S4(Phospho): 100; S5(Phospho): 100	S4; S5;	153945728	NP_005900.2	EAERSLMsSPEDLTK;AERSLMSsPEDLTKD	Yes;Yes
ZCCHC7	84186	zinc finger CCHC domain-containing protein 7 [Homo sapiens]	S482	TYSsPGSFK	574281528	2×TMT6plex [N-Term; K9]; 1×Phospho [S4(99.2)]	574281528 1×Phospho [S482(99.2)]	0.0378229	0.00190073	1	1	2	574281528	574281528 [479-487]	0	1511.75	S4(Phospho): 99.17	2.39	1.36	2.26	0.96	2.3	1.18							2.58705	High	0.0004809	0.006382	13.6	High	0.0005165	1	S4(Phospho): 99.17	S4;	574281528	NP_001276048.1	RGPKTYSsPGSFKTQ	Yes
MAP1B	4131	microtubule-associated protein 1B [Homo sapiens]	S1501	LGDVsPTQIDVSQFGSFK	153945728	2×TMT6plex [N-Term; K18]; 1×Phospho [S5(100)]	153945728 1×Phospho [S1501(100)]	7.26e-05	9e-05	1	1	34	153945728	153945728 [1497-1514]	0	2463.26	S5(Phospho): 100	3.3	7.31	4.22	1.25	1.12	2.68	4.56	8.04	5.77	1.62	1.17	3.23	6.88839	High	2.03e-05	3.07e-05	43.99	High	6.51e-05	1	S5(Phospho): 100	S5;	153945728	NP_005900.2	ERKLGDVsPTQIDVS	Yes
HDAC6	10013	histone deacetylase 6 [Homo sapiens]	S22	QNPQsPPQDSSVTSK	13128864	2×TMT6plex [N-Term; K15]; 1×Phospho [S5(100)]	13128864 1×Phospho [S22(100)]	0.000142719	9e-05	1	1	6	13128864	13128864 [18-32]	0	2138.05	S5(Phospho): 100	1.44	1.3	2.61	1.26	2.17	2.29	1.43	1.28	2.06	1.08	1.98	1.96	5.31448	High	2.03e-05	4.92e-05	44.29	High	6.51e-05	1	S5(Phospho): 100	S5;	13128864	NP_006035.2	RSRQNPQsPPQDSSV	Yes
KDM5C	8242	lysine-specific demethylase 5C isoform 1 [Homo sapiens]	S893	EALAsLPSSPGLLQSLLER	109255243	1×TMT6plex [N-Term]; 1×Phospho [S5(97.1)]	109255243 1×Phospho [S893(97.1)]	0.000407836	0.000193352	1	3	3	543887186; 109255243; 226442963	109255243 [889-907]	0	2290.23	S5(Phospho): 97.08	2.25	4.11	1.47	1.78	2.41	2.1							3.17982	High	3.79e-05	0.0001196	20.52	High	7.92e-05	1	S5(Phospho): 97.08	S5;	109255243	NP_004178.2	EAREALAsLPSSPGL	No
RABEP1	9135	rab GTPase-binding effector protein 1 isoform 1 [Homo sapiens]	S377	GSVHsLDAGLLLPSGDPFSK	31377798	2×TMT6plex [N-Term; K20]; 1×Phospho [S5(100)]	31377798 1×Phospho [S377(100)]	5e-05	6.55e-05	1	3	3	31377798; 615276234; 134152674	31377798 [373-392]	0	2535.33	S5(Phospho): 99.99	3.07	1.93	2.13	2.08	0.85	2.08							6.32034	High	1.3e-05	2.3e-05	41.14	High	2.27e-05	1	S5(Phospho): 99.99	S5;	31377798	NP_004694.2	STRGSVHsLDAGLLL	Yes
LIMCH1	22998	LIM and calponin homology domains-containing protein 1 isoform a [Homo sapiens]	S718	VVKPKsPEPEATLTFPFLDK	163310741	4×TMT6plex [N-Term; K3; K5; K20]; 1×Phospho [S6(100)]	163310741 1×Phospho [S718(100)]	5.61e-05	6.55e-05	1	7	16	163310747; 163310749; 163310743; 163310741; 574285787; 574285545; 163310745	163310741 [713-732]	1	3239.85	S6(Phospho): 100	1.31	4.63	1.73	3.42	4.65	1.84	1.33	5.92	2.12	5.95	6.3	2.59	7.55888	High	1.3e-05	2.51e-05	12.82	High	0.0001068	1	S6(Phospho): 100	S6;	163310741	NP_055803.2	QKVVKPKsPEPEATL	Yes
MAP1B	4131	microtubule-associated protein 1B [Homo sapiens]	S1501	KLGDVsPTQIDVSQFGSFK	153945728	3×TMT6plex [N-Term; K19; K]; 1×Phospho [S6(100)]	153945728 1×Phospho [S1501(100)]	5.75e-05	6.55e-05	1	1	55	153945728	153945728 [1496-1514]	1	2820.52	S6(Phospho): 99.98	4.79	16.39	4.5	1.2	0.94	2.87	5.38	20.24	5.47	1.62	1	2.86	7.96614	High	2.03e-05	4.01e-05	70.37	High	2.27e-05	1	S6(Phospho): 99.98	S6;	153945728	NP_005900.2	ERKLGDVsPTQIDVS	Yes
CKAP4	10970	cytoskeleton-associated protein 4 [Homo sapiens]	S17	GGHGAAsPSEK	19920317	2×TMT6plex [N-Term; K11]; 1×Phospho [S7(100)]	19920317 1×Phospho [S17(100)]	0.000173008	0.00012481	1	1	20	19920317	19920317 [11-21]	0	1535.76	S7(Phospho): 100	2.48	4.57	1.21	1.31	1.57	2.04	1.58	3.23	1.06	1.23	1.35	2.02	5.15929	High	2.03e-05	5.75e-05	43.1	High	6.51e-05	1	S7(Phospho): 100	S7;	19920317	NP_006816.2	KGGHGAAsPSEKGAH	Yes
GTF3C1	2975	general transcription factor 3C polypeptide 1 isoform 1 [Homo sapiens]	S1068	NSSTDQGsDEEGSLQK	101943240	2×TMT6plex [N-Term; K16]; 1×Phospho [S8(100)]	101943240 1×Phospho [S1068(100)]	0.000184504	0.00012481	1	2	4	555943794; 101943240	101943240 [1061-1076]	0	2220.01	S8(Phospho): 100	1.69	0.7	1.26	2.72	2.76	2.49	1.22	0.52	1.21	1.79	2.37	1.63	2.45507	High	2.03e-05	9.02e-05	39.4	High	5.72e-05	1	S8(Phospho): 100	S8;	101943240	NP_001511.2	NSSTDQGsDEEGSLQ	Yes
MAP1B	4131	microtubule-associated protein 1B [Homo sapiens]	S614	EVPSKEEPsPVK	153945728	3×TMT6plex [N-Term; K5; K12]; 1×Phospho [S9(100)]	153945728 1×Phospho [S614(100)]	0.0363895	0.00185874	1	1	6	153945728	153945728 [606-617]	1	2093.15	S9(Phospho): 100	5.17	15.71	5.76	1.17	1.22	2.88	3.27	9.12	3	1.01	1.01	2.17	3.24145	High	0.0004774	0.006164	7.55	High	0.008736	1	S9(Phospho): 100	S9;	153945728	NP_005900.2	VPSKEEPsPVKAEVA	Yes
UBE2O	63893	ubiquitin-conjugating enzyme E2 O [Homo sapiens]	S896	KEDKPEGQsPVK	192449449	4×TMT6plex [N-Term; K4; K12; K]; 1×Phospho [S9(100)]	192449449 1×Phospho [S896(100)]	0.0177493	0.00113187	1	1	5	192449449	192449449 [888-899]	1	2338.32	S9(Phospho): 100	2.05	1.5	1.72	2.71	2.25	1.8	3.23	2.36	2.81	7.21	5.54	6.65	5.20804	High	0.0006194	0.008934	5.93	High	0.0008382	1	S9(Phospho): 100	S9;	192449449	NP_071349.3	EDKPEGQsPVKAEWP	Yes
AHNAK	79026	neuroblast differentiation-associated protein AHNAK isoform 1 [Homo sapiens]	S5830	FGTFGGLGsK	61743954	2×TMT6plex [N-Term; K10]; 1×Phospho [S9(100)]	61743954 1×Phospho [S5830(100)]	0.000780121	0.000193352	1	1	8	61743954	61743954 [5822-5831]	0	1508.79	S9(Phospho): 100	0.81	1.08	10.01	5.44	4.65	1.59	0.8	1.25	6.14	3.66	3.14	1.42	4.11514	High	5.93e-05	0.0002458	31.2	High	8.27e-05	1	S9(Phospho): 100	S9;	61743954	NP_001611.1	GTFGGLGsKSKGHYE	Yes
RB1	5925	retinoblastoma-associated protein [Homo sapiens]	S807; S811	IPGGNIYIsPLKsPYK	108773787	3×TMT6plex [N-Term; K12; K16]; 2×Phospho [S9(100); S13(100)]	108773787 2×Phospho [S807(100); S811(100)]	0.000534395	0.000193352	1	1	5	108773787	108773787 [799-814]	1	2594.4	S9(Phospho): 100; S13(Phospho): 100	2.95	0.85	2.71	1.46	2.02	4.52							5.24767	High	5.25e-05	0.0001471	16.72	High	0.0001929	1	S9(Phospho): 100; S13(Phospho): 100	S9; S13;	108773787	NP_000312.2	PGGNIYIsPLKSPYK;IYISPLKsPYKISEG	Yes;Yes
MAP1B	4131	microtubule-associated protein 1B [Homo sapiens]	T1912	tTKSPSDSGYSYETIGK	153945728	3×TMT6plex [N-Term; K3; K17]; 1×Phospho [S4(97.8)]	153945728 1×Phospho [S1915(97.8)]	0.000665071	0.000193352	1	1	12	153945728	153945728 [1912-1928]	1	2588.31	T1(Phospho): 97.35	2.2	4.96	3.48	1.3	1.22	2.45	7.21	18.69	11.67	1.91	1.55	7.09	5.74056	High	5.25e-05	0.0001735	34.51	High	0.0001716	1	T1(Phospho): 97.35	T1;	153945728	NP_005900.2	YYEKIERtTKSPSDS	Yes
NAV3	89795	neuron navigator 3 isoform 1 [Homo sapiens]	T656	AHSENEGTALPSADSCTSPtK	557636663	2×TMT6plex [N-Term; K21]; 1×Carbamidomethyl [C16]; 1×Phospho [T20(100)]	557636663 1×Phospho [T656(100)]	4.91e-05	6.55e-05	1	2	8	120953251; 557636663	557636663 [637-657]	0	2698.24	T20(Phospho): 99.99	3.11	3.26	2.83	1.06	1.18	2.23	2.88	2.8	2.84	1.04	1.11	1.83	5.81627	High	1.3e-05	2.21e-05	37.25	High	1.91e-05	1	T20(Phospho): 99.99	T20;	557636663	NP_001019554.1	ADSCTSPtKMDLSYS	No
CFL1	1072	cofilin-1 [Homo sapiens]	T25	SStPEEVK	5031635	2×TMT6plex [N-Term; K8]; 1×Phospho [T3(100)]	5031635 1×Phospho [T25(100)]	0.180763	0.0096581	1	1	7	5031635	5031635 [23-30]	0	1414.72	T3(Phospho): 100	1.88	1.53	2.09	1.59	2.24	2.42	1.53	1.23	1.91	1.58	2.35	2.33	2.16329	High	0.002825	0.05529	20.35	High	0.008843	1	T3(Phospho): 100	T3;	5031635	NP_005498.1	MKVRKSStPEEVKKR	Yes
NIFK	84365	MKI67 FHA domain-interacting nucleolar phosphoprotein [Homo sapiens]	T223	VSGTLDtPEK	222352111	2×TMT6plex [N-Term; K10]; 1×Phospho [T7(100)]	222352111 1×Phospho [T223(100)]	0.00563248	0.000453644	1	1	10	222352111	222352111 [217-226]	0	1584.83	T7(Phospho): 100	2.01	1.82	1.96	1.73	2.74	2.12	1.98	1.84	2.17	2.17	3.67	2.48	3.85919	High	0.0002059	0.001974	27.7	High	0.0002679	1	T7(Phospho): 100	T7;	222352111	NP_115766.3	KVSGTLDtPEKTVDS	No
MAP1B	4131	microtubule-associated protein 1B [Homo sapiens]	T2305	AAKPTTtPEVK	153945728	3×TMT6plex [N-Term; K3; K11]; 1×Phospho [T7(100)]	153945728 1×Phospho [T2305(100)]	0.0762524	0.0035909	1	1	5	153945728	153945728 [2299-2309]	0	1910.1	T7(Phospho): 99.99	3.61	18.05	3.85	0.99	1.28	2.14	4.02	22.41	4.43	1	1.02	2.03	2.78697	High	0.001464	0.027	3.23	High	0.0008456	1	T7(Phospho): 99.99	T7;	153945728	NP_005900.2	KAAKPTTtPEVKAAR	Yes
MARCKS	4082	myristoylated alanine-rich C-kinase substrate [Homo sapiens]	S163; S167	sFKLsGFSFK	153070260	3×TMT6plex [N-Term; K3; K10]; 2×Phospho [S1(100); S5(99)]	153070260 2×Phospho [S163(100); S167(99)]	0.0536847	0.00248252	1	1	3	153070260	153070260 [163-172]	1	1995.04	S1(Phospho): 100; S5(Phospho): 98.99	0.4	2.09	3.29	1.56	2.51	1.26							3.60877	High	0.000626	0.009246					S1(Phospho): 100; S5(Phospho): 98.99	S1; S5;	153070260	NP_002347.5	KRFSFKKsFKLSGFS;FKKSFKLsGFSFKKN	Yes;Yes
EML1	2009	echinoderm microtubule-associated protein-like 1 isoform a [Homo sapiens]	S179	TGsTSSSSSGK	56790932	2×TMT6plex [N-Term; K11]; 1×Phospho [S3(100)]	56790932 1×Phospho [S179(100)]	0.0316851	0.00168507	1	2	4	56790932; 56790930	56790932 [177-187]	0	1523.74	S3(Phospho): 99.95	3.62	1.04	0.45	2.45	0.63	0.65	2.5	0.84	0.48	1.65	0.55	0.65	1.78991	High	0.0004038	0.005325	3.37	High	0.001732	1	S3(Phospho): 99.95	S3;	56790932	NP_001008707.1	GNRNRTGsTSSSSSG	No
NOP2	4839	probable 28S rRNA (cytosine(4447)-C(5))-methyltransferase isoform 3 [Homo sapiens]	S67	TNKsPEAKPLPGK	385198061	4×TMT6plex [N-Term; K3; K8; K13]; 1×Phospho [S4(100)]	385198061 1×Phospho [S67(100)]	0.00534468	0.000453644	1	4	10	385198063; 76150623; 385198059; 385198061	385198061 [64-76]	1	2363.39	S4(Phospho): 99.99	0.98	0.47	1.04	1.65	3.17	2.74							3.96691	High	0.0002235	0.002422	6.72	High	0.001136	1	S4(Phospho): 99.99	S4;	385198061	NP_001245238.1	EAPKTNKsPEAKPLP	Yes
BRCA1	672	breast cancer type 1 susceptibility protein isoform 2 [Homo sapiens]	S1217; S1218	KLESSEENLssEDEELPCFQHLLFGK	237681119	3×TMT6plex [N-Term; K26; K]; 1×Carbamidomethyl [C18]; 2×Phospho [S10(100); S11(100)]	237681119 2×Phospho [S1217(100); S1218(100)]	0.000126664	9e-05	1	3	6	237681119; 237681121; 6552299	237681119 [1208-1233]	1	3912.86	S10(Phospho): 100; S11(Phospho): 100	2.05	1.11	1.94	1.32	2.12	1.47	2.45	1.98	2.27	1.35	2.5	1.89	5.87363	High	2.03e-05	4.53e-05	27.47	High	0.0001068	1	S10(Phospho): 100; S11(Phospho): 100	S10; S11;	237681119	NP_009231.2	ESSEENLsSEDEELP;SSEENLSsEDEELPC	Yes;Yes
GPRIN1	114787	G protein-regulated inducer of neurite outgrowth 1 [Homo sapiens]	S615	VGSLPLEKGsPVTTTK	112821681	3×TMT6plex [N-Term; K8; K16]; 1×Phospho [S10(98.8)]	112821681 1×Phospho [S615(98.8)]	0.00983536	0.000765738	1	1	4	112821681	112821681 [606-621]	1	2381.37	S10(Phospho): 98.79	2.23	1.33	2.04	1.35	1.26	2.71	2.42	1.47	1.84	1.25	1.49	2.74	3.16769	High	0.0003352	0.004005	17.13	High	0.0001929	1	S10(Phospho): 98.79	S10;	112821681	NP_443131.2	SLPLEKGsPVTTTKA	Yes
UFD1L	7353	ubiquitin fusion degradation protein 1 homolog isoform A [Homo sapiens]	S299	FVAFSGEGQsLR	29501813	1×TMT6plex [N-Term]; 1×Phospho [S10(100)]	29501813 1×Phospho [S299(100)]	0.00164514	0.000236062	1	1	2	29501813	29501813 [290-301]	0	1606.78	S10(Phospho): 99.99	1.05	2.81	3.67	4.49	1.62	1.05							3.9821	High	0.0001016	0.0004924	40.81	High	0.0001068	1	S10(Phospho): 99.99	S10;	29501813	NP_005650.2	AFSGEGQsLRKKGRK	Yes
ZNF638	27332	zinc finger protein 638 isoform 1 [Homo sapiens]	S128	QSSVTQVTEQsPK	21626468	2×TMT6plex [N-Term; K13]; 1×Phospho [S11(100)]	21626468 1×Phospho [S128(100)]	0.000618245	0.000193352	1	2	2	21626468; 357933604	21626468 [118-130]	0	1957	S11(Phospho): 100	3.13	2.89	2.41	1.24	1.65	1.21							4.291	High	5.25e-05	0.0001645	38.72	High	8.27e-05	1	S11(Phospho): 100	S11;	21626468	NP_055312.2	VTQVTEQsPKVQSRY	Yes
SMPD4	55627	sphingomyelin phosphodiesterase 4 isoform 2 [Homo sapiens]	S169	ASIQECILPDsPLYHNK	102467481	2×TMT6plex [N-Term; K17]; 1×Deamidated [Q4; N]; 1×Carbamidomethyl [C6]; 1×Phospho [S11(100)]	102467481 1×Phospho [S169(100)]	0.000141294	9e-05	1	3	6	102467481; 283806604; 102467484	102467481 [159-175]	0	2524.26	S11(Phospho): 100	2.75	1.34	1.34	1.71	2.09	1.27	1.75	1.29	0.82	1.07	1.19	1.1	4.95882	High	2.03e-05	4.87e-05	34.39	High	7.11e-05	1	S11(Phospho): 100	S11;	102467481	NP_060421.2	QECILPDsPLYHNKV	No
DDX21	9188	nucleolar RNA helicase 2 isoform 1 [Homo sapiens]	S71	KAEPSEVDMNsPK	50659095	3×TMT6plex [N-Term; K13; K]; 1×Oxidation [M9]; 1×Phospho [S11(100)]	50659095 1×Phospho [S71(100)]	0.000623531	0.000193352	1	1	10	50659095	50659095 [61-73]	1	2215.13	S11(Phospho): 100	2.51	1.81	1.87	1.47	1.92	2.19	2.12	1.4	1.26	1.07	1.44	1.61	4.23453	High	5.93e-05	0.0002516	24.62	High	8.27e-05	1	S11(Phospho): 100	S11;	50659095	NP_004719.2	PSEVDMNsPKSKKAK	Yes
DOCK7	85440	dedicator of cytokinesis protein 7 isoform 1 [Homo sapiens]	S2118	AVLPVTCHRDsFSR	431822375	1×TMT6plex [N-Term]; 1×Carbamidomethyl [C7]; 1×Phospho [S11(98.9)]	431822375 1×Phospho [S2118]	0.15992	0.00845531	1	4	1	431822375; 54112429; 431822377; 431822379	431822375 [2108-2121]	1	1953.96	S11(Phospho): 98.87	2.53	3.38	1.82	2.03	1.75	2							2.84642	Medium	0.01384	0.2994	16.13	High	0.001871	1	S11(Phospho): 98.87	S11;	431822375	NP_001258928.1	PVTCHRDsFSRMSLR	No
MARCKSL1	65108	MARCKS-related protein [Homo sapiens]	S22	GDVTAEEAAGAsPAKANGQENGHVK	13491174	3×TMT6plex [N-Term; K15; K25]; 2×Deamidated [N/Q]; 1×Phospho [S12(100)]	13491174 1×Phospho [S22(100)]	4.27e-05	0	1	1	28	13491174	13491174 [11-35]	1	3177.57	S12(Phospho): 100	1.76	2.97	2.05	1.31	1.54	2.08	2.62	3.43	2.47	1.42	1.92	2.19	9.01684	High	0	4.3e-06	57.07	High	1.91e-05	1	S12(Phospho): 100	S12;	13491174	NP_075385.1	AEEAAGAsPAKANGQ	Yes
DIS3L2	129563	DIS3-like exonuclease 2 isoform 1 [Homo sapiens]	S31	GVSAVAGPHDIGAsPGDKK	134288890	3×TMT6plex [N-Term; K18; K19]; 1×Phospho [S14(100)]	134288890 1×Phospho [S31(100)]	0.0210548	0.00134	1	3	1	381214353; 381214351; 134288890	134288890 [18-36]	1	2530.36	S14(Phospho): 100	1.78	1.98	1.89	1.44	2.65	2.13							3.34244	High	0.0003287	0.003494					S14(Phospho): 100	S14;	134288890	NP_689596.4	GPHDIGAsPGDKKSK	Yes
CDCA2	157313	cell division cycle-associated protein 2 [Homo sapiens]	S936	TICTFDSSGFESMsPIKETVSSR	44681484	2×TMT6plex [N-Term; K17]; 1×Carbamidomethyl [C3]; 1×Phospho [S14(100)]	44681484 1×Phospho [S936(100)]	0.000710202	0.000193352	1	1	6	44681484	44681484 [923-945]	1	3104.47	S14(Phospho): 99.97	2.98	1.84	2.66	1.58	1.88	1.7	2.85	1.69	3.26	1.65	1.23	1.87	4.05067	High	5.93e-05	0.000211	19.13	High	0.0001709	1	S14(Phospho): 99.97	S14;	44681484	NP_689775.2	SSGFESMsPIKETVS	Yes
HN1L	90861	hematological and neurological expressed 1-like protein [Homo sapiens]	S30	AMKPPGGESSNLFGsPEEATPSSRPNR	21700763	2×TMT6plex [N-Term; K3]; 1×Phospho [S15(100)]	21700763 1×Phospho [S30(100)]	0.000116345	9e-05	1	1	2	21700763	21700763 [16-42]	0	3338.62	S15(Phospho): 100	1.9	2.1	1.55	1.72	1.29	2.25							5.70574	High	2.03e-05	4.21e-05	20.45	High	7.72e-05	1	S15(Phospho): 100	S15;	21700763	NP_653171.1	ESSNLFGsPEEATPS	Yes
KIAA1671	85379	uncharacterized protein KIAA1671 [Homo sapiens]	S1224	RsPTVEPSTLPR	223633988	1×TMT6plex [N-Term]; 1×Phospho [S2(100)]	223633988 1×Phospho [S1224(100)]	0.000197694	0.00012481	1	1	2	223633988	223633988 [1223-1234]	1	1648.86	S2(Phospho): 100	1.81	1.25	2.6	3.45	2.64	1.73							4.35746	High	2.03e-05	6.44e-05	18.9	High	8.36e-05	1	S2(Phospho): 100	S2;	223633988	NP_001138678.1	GEAQERRsPTVEPST	Yes
BAZ1A	11177	bromodomain adjacent to zinc finger domain protein 1A isoform a [Homo sapiens]	S270	IAEQDFSYFFPDDPPTFIFsPANR	32967603	1×TMT6plex [N-Term]; 1×Phospho [S20(100)]	32967603 1×Phospho [S270(100)]	0.000607845	0.000193352	1	2	2	32967603; 32967605	32967603 [251-274]	0	3130.44	S20(Phospho): 99.96	2.58	1.44	1.69	1.53	1.75	2.84							3.05441	High	5.25e-05	0.0001624	12.19	High	0.0001264	1	S20(Phospho): 99.96	S20;	32967603	NP_038476.2	DPPTFIFsPANRRRG	Yes
UBXN1	51035	UBX domain-containing protein 1 isoform 1 [Homo sapiens]	S200	YGGSVGSQPPPVAPEPGPVPSsPSQEPPTK	21361517	2×TMT6plex [N-Term; K30]; 1×Phospho [S22(94.6)]	21361517 1×Phospho [S200(94.6)]	0.00451843	0.000406702	1	3	4	554790273; 554506522; 21361517	21361517 [179-208]	0	3465.73	S22(Phospho): 94.58	1.62	1.44	2.15	0.94	2.41	1.62							3.17934	High	0.0001764	0.001434	5.72	High	0.0001716	1	S22(Phospho): 94.58	S22;	21361517	NP_056937.2	EPGPVPSsPSQEPPT	Yes
MAP4	4134	microtubule-associated protein 4 isoform 1 [Homo sapiens]	S624	GISEDSHLESLQDVGQSAAPTFMIsPETVTGTGK	47519639	2×TMT6plex [N-Term; K34]; 1×Deamidated [Q]; 1×Phospho [S25(97.8)]	47519639 1×Phospho [S624(97.8)]	4.27e-05	6.55e-05	1	2	38	47519639; 197276600	47519639 [600-633]	0	4028.95	S25(Phospho): 97.77	2.59	1.5	3.59	1.28	1.88	4.37							7.86409	High	0	5.85e-06	61.34	High	1.91e-05	1	S25(Phospho): 97.77	S25;	47519639	NP_002366.2	AAPTFMIsPETVTGT	Yes
LRWD1	222229	leucine-rich repeat and WD repeat-containing protein 1 [Homo sapiens]	S212	ANsPEKPPEAGAAHKPR	23097240	3×TMT6plex [N-Term; K6; K15]; 1×Phospho [S3(100)]	23097240 1×Phospho [S212(100)]	6.32e-05	6.55e-05	1	1	13	23097240	23097240 [210-226]	0	2524.36	S3(Phospho): 100	1.98	2.04	2.41	1.17	2.28	1.74	2.32	1.92	2.83	1.85	3.67	2.45	6.11699	High	1.3e-05	2.77e-05	13.6	High	5.72e-05	1	S3(Phospho): 100	S3;	23097240	NP_690852.1	TQVQKANsPEKPPEA	Yes
IRF2BPL	64207	interferon regulatory factor 2-binding protein-like [Homo sapiens]	S334	RPGsVSSTDQER	33457336	1×TMT6plex [N-Term]; 1×Phospho [S4(100)]	33457336 1×Phospho [S334(100)]	0.00215522	0.000261096	1	1	12	33457336	33457336 [331-342]	0	1627.76	S4(Phospho): 100	2.32	3.67	2.32	1.58	1.92	1.94							4.07555	High	0.0001218	0.0006713	42.06	High	0.0001245	1	S4(Phospho): 100	S4;	33457336	NP_078772.1	AGGKRPGsVSSTDQE	Yes
CAST	831	calpastatin isoform f [Homo sapiens]	S34	TSEsPSKPGEK	109637759	3×TMT6plex [N-Term; K7; K11]; 1×Phospho [S4(100)]	109637759 1×Phospho [S34(100)]	0.0516289	0.00246555	1	1	7	109637759	109637759 [31-41]	0	1914.02	S4(Phospho): 100	1.88	1.24	2.59	1.92	3.1	1.89	3.05	1.97	5.49	4.26	7.81	4.73	3.0957	High	0.0006087	0.00887	5.52	High	0.007565	1	S4(Phospho): 100	S4;	109637759	NP_001035905.1	VSEKTSEsPSKPGEK	Yes
LCP1	3936	plastin-2 [Homo sapiens]	S257	EGEsLEDLMK	167614506	2×TMT6plex [N-Term; K10]; 1×Phospho [S4(100)]	167614506 1×Phospho [S257(100)]	0.00838216	0.000620563	1	1	11	167614506	167614506 [254-263]	0	1688.82	S4(Phospho): 100	1.47	2.45	1.19	16.07	1.5	9.98	1.14	1.86	0.97	9.46	0.96	6.29	3.20561	High	0.000599	0.008404	27.37	High	0.003142	1	S4(Phospho): 100	S4;	167614506	NP_002289.2	ALLREGEsLEDLMKL	Yes
PLEKHA7	144100	pleckstrin homology domain-containing family A member 7 [Homo sapiens]	S903; S907	KVTsPLQsPTK	239047795	3×TMT6plex [N-Term; K11; K]; 2×Phospho [S4(99.2); S8(100)]	239047795 2×Phospho [S903(99.2); S907(100)]	0.0361098	0.00185874	1	1	12	239047795	239047795 [900-910]	1	2033.11	S4(Phospho): 99.17; S8(Phospho): 100	1.72	6.8	1.77	1.84	3.76	1.58	1.11	4.41	0.41	0.3	0.47		3.93833	High	0.0005489	0.007445	8.99	High	0.002623	1	S4(Phospho): 99.17; S8(Phospho): 100	S4; S8;	239047795	NP_778228.3	PQLRKVTsPLQSPTK;KVTSPLQsPTKAKPK	Yes;Yes
MKI67	4288	antigen KI-67 isoform 1 [Homo sapiens]	S2344	IACKsPQPDPVDTPASTK	103472005	3×TMT6plex [N-Term; K4; K18]; 1×Carbamidomethyl [C3]; 1×Phospho [S5(100)]	103472005 1×Phospho [S2344(100)]	9.63e-05	9e-05	1	2	10	103472005; 225543215	103472005 [2340-2357]	1	2679.4	S5(Phospho): 100	2.09	1.17	1.99	1.38	2.08	1.76	2.51	1.29	2.32	1.64	2.2	1.97	6.42436	High	2.03e-05	7.37e-05	26.9	High	8.36e-05	1	S5(Phospho): 100	S5;	103472005	NP_002408.3	TTKIACKsPQPDPVD	Yes
CDC42EP1	11135	cdc42 effector protein 1 [Homo sapiens]	S142	LSFDsSPTSSTDGHSSYGLDSGFCTISR	23238226	1×TMT6plex [N-Term]; 1×Carbamidomethyl [C24]; 1×Phospho [S5(98.5)]	23238226 1×Phospho [S142(98.5)]	6.65e-05	6.55e-05	1	1	9	23238226	23238226 [138-165]	0	3277.42	S5(Phospho): 98.46	2.65	2.54	1.36	0.66	1.4	2.04	3.06	2.69	1.79	0.75	1.83	1.96	5.65843	High	1.3e-05	2.88e-05	38.81	High	2.27e-05	1	S5(Phospho): 98.46	S5;	23238226	NP_689449.1	VGKLSFDsSPTSSTD	No
FOXK1	221937	forkhead box protein K1 [Homo sapiens]	S213; S223	EEAPAsPLRPLYPQIsPLK	82546824	2×TMT6plex [N-Term; K19]; 2×Phospho [S6(100); S16(100)]	82546824 2×Phospho [S213(100); S223(100)]	0.00432159	0.000406702	1	1	7	82546824	82546824 [208-226]	0	2724.42	S6(Phospho): 100; S16(Phospho): 100	2.06	1.56	1.91	1.34	2.53	1.74							5.42907	High	0.0002091	0.002084	15.7	High	0.0005057	1	S6(Phospho): 100; S16(Phospho): 100	S6; S16;	82546824	NP_001032242.1	HKEEAPAsPLRPLYP;RPLYPQIsPLKIHIP	Yes;Yes
FOXK1	221937	forkhead box protein K1 [Homo sapiens]	S213; S223	EEAPAsPLRPLYPQIsPLK	82546824	2×TMT6plex [N-Term; K19]; 1×Deamidated [Q14]; 2×Phospho [S6(100); S16(100)]	82546824 2×Phospho [S213(100); S223(100)]	0.00215522	0.000261096	1	1	4	82546824	82546824 [208-226]	0	2725.4	S6(Phospho): 100; S16(Phospho): 100	2.03	1.49	1.78	1.33	2.33	1.64							4.43617	High	7.41e-05	0.0004282	11.26	High	0.0001716	1	S6(Phospho): 100; S16(Phospho): 100	S6; S16;	82546824	NP_001032242.1	HKEEAPAsPLRPLYP;RPLYPQIsPLKIHIP	Yes;Yes
MORC2	22880	MORC family CW-type zinc finger protein 2 isoform 1 [Homo sapiens]	S856	LMKPPsPEHQSLDTQQEGGEEEVGPVAQQAIAVAEPSTSECLR	735997387	2×TMT6plex [N-Term; K3]; 2×Deamidated [Q]; 1×Carbamidomethyl [C41]; 1×Phospho [S6(100)]	735997387 1×Phospho [S856(100)]	0.0233848	0.00137655	1	3	9	737675122; 7662340; 735997387	735997387 [851-893]	0	5170.46	S6(Phospho): 99.98	1.29	1.62	1.75	2.02	1.79	2.65							2.75741	High	0.000332	0.003886	8.91	High	0.0007027	1	S6(Phospho): 99.98	S6;	735997387	NP_001290185.1	VRLMKPPsPEHQSLD	Yes
SGK223	157285	tyrosine-protein kinase SgK223 [Homo sapiens]	S510	GPVSQNsEVGEEETSAGQGLSSR	595582408	1×TMT6plex [N-Term]; 1×Phospho [S7(100)]	595582408 1×Phospho [S510(100)]	8.51e-05	9e-05	1	1	2	595582408	595582408 [504-526]	0	2614.18	S7(Phospho): 100	2.34	2.83	1.41	1.36	2.1	1.29							5.01403	High	2.03e-05	3.41e-05	33.36	High	5.23e-05	1	S7(Phospho): 100	S7;	595582408	NP_001074295.2	RGPVSQNsEVGEEET	Yes
RSF1	51773	remodeling and spacing factor 1 [Homo sapiens]	S397	LSDDFDsPVKGPLCK	38788333	3×TMT6plex [N-Term; K10; K15]; 1×Carbamidomethyl [C14]; 1×Phospho [S7(100)]	38788333 1×Phospho [S397(100)]	0.000284051	0.000147488	1	1	11	38788333	38788333 [391-405]	1	2445.27	S7(Phospho): 100	2.09	1.6	2.03	1.51	1.94	1.68	2.32	1.69	2.28	1.86	2.38	1.7	4.99685	High	2.03e-05	8.84e-05	15.84	High	0.0001709	1	S7(Phospho): 100	S7;	38788333	NP_057662.3	KLSDDFDsPVKGPLC	Yes
TGOLN2	10618	trans-Golgi network integral membrane protein 2 isoform 2 precursor [Homo sapiens]	S71	DSPSKSsAEAQTPEDTPNK	332205947	3×TMT6plex [N-Term; K5; K19]; 1×Phospho [S4(97.3)]	332205947 1×Phospho [S68(97.3)]	0.000134485	9e-05	1	4	32	42518068; 332205949; 332205947; 332205961	332205947 [65-83]	1	2756.36	S7(Phospho): 98.61	3.43	2.01	1.08	1.04	1.19	5.1	3.6	2.46	1.17	0.91	1.49	5.09	5.59308	High	2.03e-05	4.69e-05	23.23	High	0.0001545	1	S7(Phospho): 98.61	S7;	332205947	NP_001193769.1	KDSPSKSsAEAQTPE	Yes
XRCC6	2547	X-ray repair cross-complementing protein 6 isoform 1 [Homo sapiens]	S550	KHDNEGsGSK	4503841	3×TMT6plex [N-Term; K10; K]; 1×Phospho [S7(99.4)]	4503841 1×Phospho [S550(99.4)]	0.0798857	0.00362738	1	3	9	573014819; 4503841; 573014817	4503841 [544-553]	1	1825.94	S7(Phospho): 99.36	1.76	1.15	2.68	1.16	2.38	1.99	2.07	1.39	3.19	1.5	3.2	2.34	3.05615	High	0.0008566	0.01435	10.19	High	0.004139	1	S7(Phospho): 99.36	S7;	4503841	NP_001460.1	RKHDNEGsGSKRPKV	Yes
CHAMP1	283489	chromosome alignment-maintaining phosphoprotein 1 [Homo sapiens]	S308; S319	RPAPAVsPGSWKPGPPGsPRPWK	41281612	3×TMT6plex [N-Term; K12; K23]; 2×Phospho [S7(100); S18(100)]	41281612 2×Phospho [S308(100); S319(100)]	0.0225225	0.00137655	1	1	2	41281612	41281612 [302-324]	0	3256.72	S7(Phospho): 99.95; S18(Phospho): 100	1.68	1.98	2.06	1.21	1.59	2.08							4.8251	High	0.0003287	0.003729	11.48	High	0.0008253	1	S7(Phospho): 99.95; S18(Phospho): 100	S7; S18;	41281612	NP_115812.1	RRPAPAVsPGSWKPG;WKPGPPGsPRPWKSN	Yes;Yes
FAM83D	81610	protein FAM83D [Homo sapiens]	S492	GTQSTEGsPVSK	116235448	2×TMT6plex [N-Term; K12]; 1×Phospho [S8(100)]	116235448 1×Phospho [S492(100)]	0.000798034	0.000193352	1	1	8	116235448	116235448 [485-496]	0	1715.86	S8(Phospho): 100	2.63	2.32	1.69	1.35	2.08	1.55	2.48	2.71	1.93	1.37	2.39	1.59	4.11451	High	7.41e-05	0.0003364	34.81	High	8.27e-05	1	S8(Phospho): 100	S8;	116235448	NP_112181.2	GTQSTEGsPVSKMSV	No
FOXK2	3607	forkhead box protein K2 [Homo sapiens]	S170	EKQEASEsPVK	31563338	3×TMT6plex [N-Term; K2; K11]; 1×Phospho [S8(100)]	31563338 1×Phospho [S170(100)]	0.00229435	0.000289024	1	1	8	31563338	31563338 [163-173]	1	1999.07	S8(Phospho): 100	2.48	1.52	2.33	1.98	1.6	1.81	1.22	0.77	1.17	2.58	0.67	5.42	4.63203	High	8.83e-05	0.000451	15.04	High	0.0001301	1	S8(Phospho): 100	S8;	31563338	NP_004505.2	EKQEASEsPVKAVQP	Yes
OXSR1	9943	serine/threonine-protein kinase OSR1 [Homo sapiens]	S359	AAISQLRsPR	4826878	1×TMT6plex [N-Term]; 1×Phospho [S8(100)]	4826878 1×Phospho [S359(100)]	0.0240999	0.00137655	1	1	4	4826878	4826878 [352-361]	1	1407.77	S8(Phospho): 100	2.16	2.8	1.6	1.19	1.47	1	1.88	1.97	1.2	1.26	1.37	0.93	3.44865	High	0.0005952	0.008328	15.58	High	0.0003348	1	S8(Phospho): 100	S8;	4826878	NP_005100.1	AAISQLRsPRVKESI	Yes
LIMCH1	22998	LIM and calponin homology domains-containing protein 1 isoform a [Homo sapiens]	S231	GSSDGRGsDSESDLPHR	163310741	1×TMT6plex [N-Term]; 1×Phospho [S8(100)]	163310741 1×Phospho [S231(100)]	0.00164514	0.000236062	1	7	4	163310747; 163310749; 163310743; 163310741; 574285787; 574285545; 163310745	163310741 [224-240]	1	2067.89	S8(Phospho): 100	1.99	3.03	1.31	1.55	2.15	1.24	1.89	2.84	1.48	1.76	2.64	1.59	3.7631	High	7.41e-05	0.000345	12.43	High	0.007115	1	S8(Phospho): 100	S8;	163310741	NP_055803.2	GSSDGRGsDSESDLP	Yes
MARCKS	4082	myristoylated alanine-rich C-kinase substrate [Homo sapiens]	S145; T150	AEDGATPsPSNEtPKK	153070260	3×TMT6plex [N-Term; K15; K16]; 2×Phospho [T13(100); T/S]	153070260 2×Phospho [T150(100); T/S]	0.0151048	0.000895356	1	1	18	153070260	153070260 [138-153]	1	2476.2	S8(Phospho): 97.94; T13(Phospho): 100	1.9	3.44	2.07	1.14	2.15	1.61	1.81	3.64	2.01	1.06	1.69	1.95	3.89421	High	0.001002	0.01726	18.21	High	0.0008607	1	S8(Phospho): 97.94; T13(Phospho): 100	S8; T13;	153070260	NP_002347.5	AEDGATPsPSNETPK;TPSPSNEtPKKKKKR	Yes;Yes
ZFC3H1	196441	zinc finger C3H1 domain-containing protein [Homo sapiens]	S1303; S1304	KPISDNSFssDEEQSTGPIK	87116683	3×TMT6plex [N-Term; K20; K]; 2×Phospho [S9(97.6); S10(97.6)]	87116683 2×Phospho [S1303(97.6); S1304(97.6)]	0.0248383	0.00139708	1	1	9	87116683	87116683 [1295-1314]	0	3013.44	S9(Phospho): 97.56; S10(Phospho): 97.56	1.46	2.12	1.44	1.78	2.03	1.55	1.47	1.52	1.02	1.02	0.76	1.11	2.5322	High	0.0006087	0.008678	6.83	High	0.006387	1	S9(Phospho): 97.56; S10(Phospho): 97.56	S9; S10;	87116683	NP_659419.3	PISDNSFsSDEEQST;ISDNSFSsDEEQSTG	Yes;Yes
UBAP2L	9898	ubiquitin-associated protein 2-like isoform a [Homo sapiens]	S416	NPSDSAVHsPFTK	188497758	2×TMT6plex [N-Term; K13]; 1×Phospho [S9(100)]	188497758 1×Phospho [S416(100)]	0.000443486	0.000193352	1	4	4	188497756; 568215065; 568214245; 188497758	188497758 [408-420]	0	1924.96	S9(Phospho): 99.99	1.44	1.56	2.11	1.37	2.14	1.71							4.95425	High	4.98e-05	0.0001277	15.71	High	0.0001716	1	S9(Phospho): 99.99	S9;	188497758	NP_055662.3	PSDSAVHsPFTKRQA	Yes
LIG1	3978	DNA ligase 1 isoform 1 [Homo sapiens]	T183	EGEDGDQPTtPPKPLK	4557719	3×TMT6plex [N-Term; K13; K16]; 1×Phospho [T10(100)]	4557719 1×Phospho [T183(100)]	0.000221429	0.000147488	1	2	21	574274721; 4557719	4557719 [174-189]	0	2476.29	T10(Phospho): 99.99	2.21	1.2	2.19	1.32	2	1.86	1.82	1.84	2.05	1.21	1.96	1.84	4.47411	High	2.62e-05	0.0001052	12.58	High	0.0006089	1	T10(Phospho): 99.99	T10;	4557719	NP_000225.1	EDGDQPTtPPKPLKT	Yes
DPYSL3	1809	dihydropyrimidinase-related protein 3 isoform 1 [Homo sapiens]	T85	GSGSRPGIEGDtPR	308818200	1×TMT6plex [N-Term]; 1×Phospho [T12(100)]	308818200 1×Phospho [T85(100)]	0.10456	0.00501281	1	1	2	308818200	308818200 [74-87]	0	1694.81	T12(Phospho): 100	1.94	3.45	2.01	1.64	1.9	2.39							2.76982	High	0.001116	0.0196	2.31	High	0.003873	1	T12(Phospho): 100	T12;	308818200	NP_001184223.1	RPGIEGDtPRRGQGR	Yes
MARCKS	4082	myristoylated alanine-rich C-kinase substrate [Homo sapiens]	T150	AEDGATPSPSNEtPKK	153070260	3×TMT6plex [N-Term; K15; K16]; 1×Phospho [T13(100)]	153070260 1×Phospho [T150(100)]	0.000176395	0.00012481	1	1	60	153070260	153070260 [138-153]	1	2396.23	T13(Phospho): 100	2.3	5.49	2.14	1.31	1.83	1.86	2.42	5.66	2.65	1.25	1.78	1.54	5.82849	High	2.03e-05	5.84e-05	53.58	High	0.0001716	1	T13(Phospho): 100	T13;	153070260	NP_002347.5	TPSPSNEtPKKKKKR	Yes
EIF5B	9669	eukaryotic translation initiation factor 5B [Homo sapiens]	T301	AEtPTAAEDDNEGDKK	84043963	3×TMT6plex [N-Term; K15; K16]; 1×Phospho [T3(100)]	84043963 1×Phospho [T301(100)]	0.0387112	0.00190073	1	1	2	84043963	84043963 [299-314]	1	2458.2	T3(Phospho): 100	1.53	2.02	1.7	1.76	3.16	1.8							1.88818	High	0.0005213	0.006844	6.02	High	0.0004419	1	T3(Phospho): 100	T3;	84043963	NP_056988.3	ASEEKAEtPTAAEDD	Yes
NCOA7	135112	nuclear receptor coactivator 7 isoform 1 [Homo sapiens]	T358	STGHtPTKPSGSSVSEK	313850976	3×TMT6plex [N-Term; K8; K17]; 1×Phospho [T5(100)]	313850976 1×Phospho [T358(100)]	5.55e-05	6.55e-05	1	3	4	170932526; 313850976; 313850978	313850976 [354-370]	0	2454.28	T5(Phospho): 100	2	2.92	2	1.77	2.22	1.71	1.73	3.06	1.81	2.01	2.33	1.71	5.84795	High	1.3e-05	2.48e-05	21.06	High	2.27e-05	1	T5(Phospho): 100	T5;	313850976	NP_001186549.1	LEKSTGHtPTKPSGS	Yes
YTHDC1	91746	YTH domain-containing protein 1 isoform 1 [Homo sapiens]	S287	sGSGTDGSDEK	72534750	2×TMT6plex [N-Term; K11]; 1×Phospho [S1(100)]	72534750 1×Phospho [S287(100)]	0.0104042	0.000778694	1	2	4	72534750; 94536805	72534750 [287-297]	0	1577.71	S1(Phospho): 100	2.32	1.17	1.52	1.68	2.19	1.93	1.63	0.78	0.99	0.82	1.23	0.92	2.64708	High	0.0001912	0.001727	12.06	High	0.003653	1	S1(Phospho): 100	S1;	72534750	NP_001026902.1	FTDGSVRsGSGTDGS	No
MAP7	9053	ensconsin isoform 2 [Homo sapiens]	S395	AAPAQVRPPsPGNIRPVK	310750350	2×TMT6plex [N-Term; K18]; 1×Deamidated [Q5]; 1×Phospho [S10(100)]	310750350 1×Phospho [S395(100)]	0.026189	0.00144266	1	8	1	310750348; 4505101; 310750354; 310750366; 310750368; 310750350; 310750362; 310750364	310750350 [386-403]	0	2394.34	S10(Phospho): 100	1	1.66	1.24	2.05	2.18	0.99							3.46694	High	0.0003576	0.004342					S10(Phospho): 100	S10;	310750350	NP_001185538.1	PAQVRPPsPGNIRPV	No
NCAPG	64151	condensin complex subunit 3 [Homo sapiens]	S674	TLHCEGTEINsDDEQESKEVEETATAK	21359945	3×TMT6plex [N-Term; K18; K27]; 1×Carbamidomethyl [C4]; 1×Phospho [S11(100)]	21359945 1×Phospho [S674(100)]	4.27e-05	6.55e-05	1	1	10	21359945	21359945 [664-690]	1	3817.79	S11(Phospho): 100	1.71	1.09	2.72	1.26	2.29	1.65	4	2.34	5.32	2.77	4.32	3.66	8.25463	High	0	6.35e-06	49.98	High	1.91e-05	1	S11(Phospho): 100	S11;	21359945	NP_071741.2	CEGTEINsDDEQESK	Yes
ARID4B	51742	AT-rich interactive domain-containing protein 4B isoform 1 [Homo sapiens]	S675	LSKPPFQTNPsPEMVSK	22035677	3×TMT6plex [N-Term; K3; K17]; 1×Phospho [S11(100)]	22035677 1×Phospho [S675(100)]	0.00043671	0.000193352	1	2	4	22035679; 22035677	22035677 [665-681]	0	2654.42	S11(Phospho): 100	1.32	1.08	1.51	1.66	2.02	2.02	1.55	2.07	1.61	1.29	1.47	1.2	3.51677	High	5.25e-05	0.0001654	18.44	High	7.92e-05	1	S11(Phospho): 100	S11;	22035677	NP_057458.4	PPFQTNPsPEMVSKL	Yes
TMPO	7112	thymopoietin isoform alpha [Homo sapiens]	S184	QNGSNDSDRYsDNEEGK	4507555	2×TMT6plex [N-Term; K17]; 1×Deamidated [N/Q]; 1×Phospho [S11(99)]	4507555 1×Phospho [S184(99)]	0.000895755	0.000214298	1	1	11	4507555	4507555 [174-190]	1	2454.05	S11(Phospho): 98.98	1.29	0.88	1.65	1.71	2.14	2.03	1.12	0.74	1.82	1.94	2.32	2.13	4.25407	High	5.93e-05	0.0002166	23.11	High	0.0001264	1	S11(Phospho): 98.98	S11;	4507555	NP_003267.1	SNDSDRYsDNEEGKK	Yes
ARFGEF2	10564	brefeldin A-inhibited guanine nucleotide-exchange protein 2 [Homo sapiens]	S218; S227	ELEKPIQSKPQsPVIQAAAVsPK	150417986	4×TMT6plex [N-Term; K4; K9; K23]; 2×Phospho [S12(100); S21(100)]	150417986 2×Phospho [S218(100); S227(100)]	4.27e-05	6.55e-05	1	1	8	150417986	150417986 [207-229]	0	3521.96	S12(Phospho): 100; S21(Phospho): 100	2.16	2.67	1.97	1.7	1.45	2.68	1.94	2.47	1.77	1.51	1.31	2.8	9.82457	High	0	1.59e-05	24.98	High	6.51e-05	1	S12(Phospho): 100; S21(Phospho): 100	S12; S21;	150417986	NP_006411.2	PIQSKPQsPVIQAAA;VIQAAAVsPKFVRLK	Yes;Yes
PCBP2	5094	poly(rC)-binding protein 2 isoform a [Homo sapiens]	S173	QICVVMLETLSQsPPK	14141168	2×TMT6plex [N-Term; K16]; 1×Carbamidomethyl [C3]; 1×Phospho [S13(100)]	14141168 1×Phospho [S173(100)]	7.37e-05	9e-05	1	3	10	193083108; 193083112; 14141168	14141168 [161-176]	0	2368.24	S13(Phospho): 100	1.77	1.92	1.74	2.14	1.86	2.08							4.81159	High	2.03e-05	3.1e-05	41.09	High	5.72e-05	1	S13(Phospho): 100	S13;	14141168	NP_005007.2	MLETLSQsPPKGVTI	Yes
AKAP12	9590	A-kinase anchor protein 12 isoform 1 [Homo sapiens]	S505	VLSKPPEGVVSEVEMLSsQER	21493022	2×TMT6plex [N-Term; K4]; 1×Phospho [S18(98.9)]	21493022 1×Phospho [S505(98.9)]	0.000141648	9e-05	1	2	19	21493022; 21493024	21493022 [488-508]	0	2838.47	S18(Phospho): 98.86	0.92	1.85	6.99	4.08	1.1	4.65	0.98	1.54	3.75	1.46	0.89	1.75	5.93076	High	2.03e-05	7.55e-05	21.66	High	7.92e-05	1	S18(Phospho): 98.86	S18;	21493022	NP_005091.2	SEVEMLSsQERMKVQ	Yes
MAP1B	4131	microtubule-associated protein 1B [Homo sapiens]	S1666	QsPDHPTVGAGVLHITENGPTEVDYSPSDMQDSSLSHK	153945728	2×TMT6plex [N-Term; K38]; 1×Deamidated [N/Q]; 1×Phospho [S2(100)]	153945728 1×Phospho [S1666(100)]	4.27e-05	6.55e-05	1	1	10	153945728	153945728 [1665-1702]	0	4572.13	S2(Phospho): 100	2.35	4.28	2.76	1.5	1.41	1.75	1.41	2.34	1.28	0.64	0.5	0.95	9.03342	High	0	8.53e-06	20.82	High	6.51e-05	1	S2(Phospho): 100	S2;	153945728	NP_005900.2	AMDFSRQsPDHPTVG	Yes
FHOD1	29109	FH1/FH2 domain-containing protein 1 [Homo sapiens]	S540	LsIGDLDFSDLGEDEDQDMLNVESVEAGK	118572599	2×TMT6plex [N-Term; K29]; 1×Phospho [S2(100)]	118572599 1×Phospho [S540(100)]	9.28e-05	9e-05	1	1	6	118572599	118572599 [539-567]	0	3678.7	S2(Phospho): 100	1.46	2.79	1.46	0.86	2.07	3.15	1	2.07	1.92	1.11	1.51	2.08	4.79714	High	2.03e-05	3.61e-05	36.96	High	7.11e-05	1	S2(Phospho): 100	S2;	118572599	NP_037373.2	PTRAPRLsIGDLDFS	Yes
FOXC1	2296	forkhead box protein C1 [Homo sapiens]	S320	GsPQSAAAELSSGLLASAAASSR	119395716	1×TMT6plex [N-Term]; 1×Phospho [S2(100)]	119395716 1×Phospho [S320(100)]	4.27e-05	6.55e-05	1	1	4	119395716	119395716 [319-341]	0	2398.18	S2(Phospho): 100	1.37	2.08	0.95	2.95	0.81	2.58							5.9156	High	0	1.37e-05	32.7	High	1.91e-05	1	S2(Phospho): 100	S2;	119395716	NP_001444.2	IMTSLRGsPQSAAAE	Yes
VIM	7431	vimentin [Homo sapiens]	S412	IsLPLPNFSSLNLR	62414289	1×TMT6plex [N-Term]; 1×Phospho [S9(99.2)]	62414289 1×Phospho [S419(99.2)]	0.000423557	0.000193352	1	1	43	62414289	62414289 [411-424]	0	1880.02	S2(Phospho): 100	1.11	2.66	2.39	1.4	0.57	4.56	1.42	2.58	3.49	1.02	1.05	3.39	3.90396	High	3.79e-05	0.0001232	44.04	High	8.79e-05	1	S2(Phospho): 100	S2;	62414289	NP_003371.2	EGEESRIsLPLPNFS	Yes
MED1	5469	mediator of RNA polymerase II transcription subunit 1 [Homo sapiens]	S770	LsSSDSIGPDVTDILSDIAEEASK	28559039	2×TMT6plex [N-Term; K24]; 1×Phospho [S2(96.8)]	28559039 1×Phospho [S770(96.8)]	0.000338546	0.000147488	1	1	7	28559039	28559039 [769-792]	0	2987.47	S2(Phospho): 96.84	2.14	1.06	2.3	1.93	2.75	1.49							4.36464	High	2.62e-05	0.0001028	19.56	High	0.0001245	1	S2(Phospho): 96.84	S2;	28559039	NP_004765.2	IQRMVRLsSSDSIGP	Yes
ABR	29	active breakpoint cluster region-related protein isoform b [Homo sapiens]	S33	VLEDEDVFLLEECELGTPTsPGSGSPFLVAVK	38679954	2×TMT6plex [N-Term; K32]; 1×Carbamidomethyl [C13]; 1×Phospho [S20(97.8)]	38679954 1×Phospho [S33(97.8)]	0.000124894	9e-05	1	1	7	38679954	38679954 [14-45]	0	3972.98	S20(Phospho): 97.81	3.16	2.08	2.43	1.05	1.01	1.63							4.03622	High	2.03e-05	4.5e-05	25.12	High	6.51e-05	1	S20(Phospho): 97.81	S20;	38679954	NP_001083.2	CELGTPTsPGSGSPF	No
RAD9A	5883	cell cycle checkpoint control protein RAD9A isoform 1 [Homo sapiens]	S272	DSLLDGHFVLATLSDTDSHsQDLGSPER	4759022	1×TMT6plex [N-Term]; 1×Phospho [S20(98.3)]	4759022 1×Phospho [S272(98.3)]	4.42e-05	6.55e-05	1	2	11	342672046; 4759022	4759022 [253-280]	0	3321.55	S20(Phospho): 98.26	2.21	1.49	2.45	1.83	1.15	1.67	0.9	1.09	0.89	1.09	0.83	0.73	7.02104	High	1.3e-05	1.9e-05	26.37	High	8.27e-05	1	S20(Phospho): 98.26	S20;	4759022	NP_004575.1	LSDTDSHsQDLGSPE	Yes
RANGAP1	5905	ran GTPase-activating protein 1 [Homo sapiens]	S442	ILDPNTGEPAPVLSSPPPADVSTFLAFPsPEK	4506411	2×TMT6plex [N-Term; K32]; 1×Deamidated [N5]; 1×Phospho [S29(100)]	4506411 1×Phospho [S442(100)]	6.77e-05	6.55e-05	1	1	39	4506411	4506411 [414-445]	0	3829.96	S29(Phospho): 100	2.1	2.12	1.54	1.01	1.98	2.62	1.92	1.54	1.58	1.14	1.65	1.61	5.84233	High	3.79e-05	0.0001151	25.01	High	3.2e-05	1	S29(Phospho): 100	S29;	4506411	NP_002874.1	STFLAFPsPEKLLRL	Yes
ERRFI1	54206	ERBB receptor feedback inhibitor 1 [Homo sapiens]	S369	QNsEGSASK	10047086	2×TMT6plex [N-Term; K9]; 1×Phospho [S3(100)]	10047086 1×Phospho [S369(100)]	0.05453	0.00248252	1	1	2	10047086	10047086 [367-375]	0	1445.7	S3(Phospho): 100	2.07	1.29	2.33	1.4	0.69	2.41							2.61773	High	0.0006334	0.009421	9.03	High	0.002363	1	S3(Phospho): 100	S3;	10047086	NP_061821.1	KALQRQNsEGSASKV	Yes
C10orf54	64115	platelet receptor Gi24 precursor [Homo sapiens]	S235	MDsNIQGIENPGFEASPPAQGIPEAK	62339432	2×TMT6plex [N-Term; K26]; 1×Deamidated [N/Q]; 1×Phospho [S3(100)]	62339432 1×Phospho [S235(100)]	0.00326822	0.000383028	1	1	6	62339432	62339432 [233-258]	0	3236.56	S3(Phospho): 100	1.48	2.94	1.82	2.11	1.38	1.41	1.45	3.98	1.65	1.45	1.23	1.27	3.54376	High	0.0001218	0.0006007	8.59	High	0.001698	1	S3(Phospho): 100	S3;	62339432	NP_071436.1	QELVRMDsNIQGIEN	Yes
TJP1	7082	tight junction protein ZO-1 isoform c [Homo sapiens]	S979	IDsPGFKPASQQK	666335569	3×TMT6plex [N-Term; K7; K13]; 1×Phospho [S3(100)]	666335569 1×Phospho [S979(100)]	0.0694572	0.00329092	1	2	3	666335569; 116875767	666335569 [977-989]	0	2170.19	S3(Phospho): 100	1.19	3.24	1.98	1.78	2.29	2.14							2.73318	High	0.000781	0.01229	4.09	High	0.002737	1	S3(Phospho): 100	S3;	666335569	NP_001287954.1	QPIHRIDsPGFKPAS	No
EDF1	8721	endothelial differentiation-related factor 1 isoform alpha [Homo sapiens]	S53	QHsITK	4503453	2×TMT6plex [N-Term; K6]; 1×Phospho [S3(100)]	4503453 1×Phospho [S53]	0.147567	0.00747254	1	5	1	24497601; 526253090; 526253086; 4503453; 526253088	4503453 [51-56]	0	1251.69	S3(Phospho): 100	1.02	1.25	5.31	2.2	1.15	1.34							2.77572	Medium	0.01097	0.238	18.08	High	0.001715	1	S3(Phospho): 100	S3;	4503453	NP_003783.1	AGQNKQHsITKNTAK	Yes
PLEKHA2	59339	pleckstrin homology domain-containing family A member 2 [Homo sapiens]	S401	HRsEPQHPK	154146216	2×TMT6plex [N-Term; K9]; 1×Phospho [S3(100)]	154146216 1×Phospho [S401(100)]	0.00726074	0.000523051	1	1	10	154146216	154146216 [399-407]	1	1653.86	S3(Phospho): 100	0.7	1.18	0.87	4.32	3.76	1.15	0.5	1.14	0.58	4.61	4.13	1.45	4.51292	High	0.0001488	0.001224	13.22	High	0.0009209	1	S3(Phospho): 100	S3;	154146216	NP_067636.1	SSRIRHRsEPQHPKE	Yes
WDR62	284403	WD repeat-containing protein 62 isoform 1 [Homo sapiens]	S1330	LTLSSACDGLLQPPVDTQPGVTVPAVSFPAPsPVEESALR	145580608	1×TMT6plex [N-Term]; 1×Carbamidomethyl [C7]; 1×Phospho [S32(100)]	145580608 1×Phospho [S1330(100)]	4.27e-05	6.55e-05	1	2	2	145580608; 145580610	145580608 [1299-1338]	0	4412.23	S32(Phospho): 100	1.2	2.39	3.25	1.25	1.13	2.09							7.05483	High	0	1.45e-05	26.16	High	1.91e-05	1	S32(Phospho): 100	S32;	145580608	NP_001077430.1	AVSFPAPsPVEESAL	No
NTSR1	4923	neurotensin receptor type 1 [Homo sapiens]	S401	KADsVSSNHTLSSNATR	110611243	2×TMT6plex [N-Term; K]; 1×Phospho [S4(100)]	110611243 1×Phospho [S401(100)]	0.00201467	0.000261096	1	1	4	110611243	110611243 [398-414]	1	2313.16	S4(Phospho): 100	8.9	1.48	2.14	1.01	1.3	1.57	11.3	1.35	2.17	0.99	1.21	1.41	3.69608	High	7.41e-05	0.0004056	20.48	High	0.0001716	1	S4(Phospho): 100	S4;	110611243	NP_002522.2	AFSRKADsVSSNHTL	No
MOCS2	4338	molybdopterin synthase catalytic subunit large subunit MOCS2B [Homo sapiens]	S20	LPLsPPLVEDSAFEPSR	4758732	1×TMT6plex [N-Term]; 1×Phospho [S4(100)]	4758732 1×Phospho [S20(100)]	0.000116085	9e-05	1	1	6	4758732	4758732 [17-33]	0	2163.09	S4(Phospho): 100	1.72	3.2	0.82	2.1	1.17	2.87	1.16	2.93	1.36	1.91	0.97	1.95	4.67719	High	2.03e-05	4.31e-05	52.78	High	2.27e-05	1	S4(Phospho): 100	S4;	4758732	NP_004522.1	LETKLPLsPPLVEDS	Yes
TBX2	6909	T-box transcription factor TBX2 [Homo sapiens]	S676	GALsPSGSAK	197333868	2×TMT6plex [N-Term; K10]; 1×Phospho [S4(100)]	197333868 1×Phospho [S676(100)]	0.0300329	0.00159584	1	1	4	197333868	197333868 [673-682]	0	1412.76	S4(Phospho): 100	1.37	3.31	1.32	2.63	3.36	1.98	1.24	2.37	1.01	2.15	2.47	1.47	2.50636	High	0.001109	0.01946	20.01	High	0.001018	1	S4(Phospho): 100	S4;	197333868	NP_005985.3	APSRGALsPSGSAKE	Yes
TGFB1I1	7041	transforming growth factor beta-1-induced transcript 1 protein isoform 1 [Homo sapiens]	S137; S140	KRPsLPsSPSPGLPK	109638745	3×TMT6plex [N-Term; K15; K]; 2×Phospho [S4(100); S7(100)]	109638745 2×Phospho [S137(100); S140(100)]	0.00341068	0.000383028	1	2	10	21361591; 109638745	109638745 [134-148]	1	2395.31	S4(Phospho): 100; S7(Phospho): 99.98	1.56	2.1	1.47	2.55	0.68	2.35	0.96	1.98	1.69	2.45	0.71	2.26	5.25601	High	0.0003287	0.003477	16.04	High	0.00236	1	S4(Phospho): 100; S7(Phospho): 99.98	S4; S7;	109638745	NP_001035919.1	SEDKKRPsLPSSPSP;KKRPSLPsSPSPGLP	Yes;Yes
TOP2B	7155	DNA topoisomerase 2-beta [Homo sapiens]	S1547	ASGsENEGDYNPGR	19913408	1×TMT6plex [N-Term]; 1×Phospho [S4(100)]	19913408 1×Phospho [S1547(100)]	0.0129742	0.000802252	1	1	4	19913408	19913408 [1544-1557]	0	1761.73	S4(Phospho): 99.98	2.34	1.55	1.64	2.18	1.92	1.53	2.41	1.54	1.57	1.94	1.57	1.43	2.31642	High	0.0002127	0.002144	18.72	High	0.0004033	1	S4(Phospho): 99.98	S4;	19913408	NP_001059.2	KKRKASGsENEGDYN	No
HSF1	3297	heat shock factor protein 1 [Homo sapiens]	S314	VEEAsPGRPSSVDTLLSPTALIDSILR	5031767	1×TMT6plex [N-Term]; 1×Phospho [S5(100)]	5031767 1×Phospho [S314(100)]	0.000464656	0.000193352	1	1	5	5031767	5031767 [310-336]	0	3132.64	S5(Phospho): 100	2.31	1.62	1.59	2.04	1.9	1.35							4.3138	High	4.98e-05	0.0001324	14.24	High	8.36e-05	1	S5(Phospho): 100	S5;	5031767	NP_005517.1	SPRVEEAsPGRPSSV	Yes
SLCO4A1	28231	solute carrier organic anion transporter family member 4A1 [Homo sapiens]	S50	SAAHsPLDTSK	39777594	2×TMT6plex [N-Term; K11]; 1×Phospho [S5(100)]	39777594 1×Phospho [S50(100)]	0.0011068	0.000214298	1	1	4	39777594	39777594 [46-56]	0	1651.85	S5(Phospho): 100	2.28	1.37	3.88	1.55	1.55	2.41							4.12419	High	6.44e-05	0.0002546	26.79	High	0.0001264	1	S5(Phospho): 100	S5;	39777594	NP_057438.3	SLRSAAHsPLDTSKQ	Yes
KRT18	3875	keratin, type I cytoskeletal 18 [Homo sapiens]	S60	GGMGsGGLATGIAGGLAGMGGIQNEK	4557888	2×TMT6plex [N-Term; K26]; 1×Phospho [S5(100)]	4557888 1×Phospho [S60(100)]	4.27e-05	6.55e-05	1	1	8	4557888	4557888 [56-81]	0	2799.39	S5(Phospho): 100	0.69	1.16	0.85	2.16	2.16	0.9							8.84057	High	0	6.64e-06	64.77	High	1.91e-05	1	S5(Phospho): 100	S5;	4557888	NP_000215.1	SFRGGMGsGGLATGI	Yes
PTPN1	5770	tyrosine-protein phosphatase non-receptor type 1 isoform 1 [Homo sapiens]	S386	GAQAAsPAK	4506289	2×TMT6plex [N-Term; K9]; 1×Phospho [S6(100)]	4506289 1×Phospho [S386(100)]	0.00963094	0.000765738	1	2	8	519666804; 4506289	4506289 [381-389]	0	1338.72	S6(Phospho): 100	1.8	3.92	1.57	1.42	2.06	1.91	1.51	3.05	1.13	0.9	0.94	0.87	3.49947	High	0.0003157	0.003293	23.37	High	0.0004033	1	S6(Phospho): 100	S6;	4506289	NP_002818.1	LRGAQAAsPAKGEPS	Yes
EIF4B	1975	eukaryotic translation initiation factor 4B isoform 1 [Homo sapiens]	S464	EEDCHsPTSKPPKPDQPLK	664805999	4×TMT6plex [N-Term; K10; K13; K19]; 1×Carbamidomethyl [C4]; 1×Phospho [S6(100)]	664805999 1×Phospho [S464(100)]	0.000300817	0.000147488	1	2	7	664805999; 50053795	664805999 [459-477]	0	3186.67	S6(Phospho): 100	1.42	1.75	1.84	1.5	2.41	2.39	1	1.15	0.86	0.52	0.96	0.56	4.99454	High	2.03e-05	9.29e-05	2	High	0.0001301	1	S6(Phospho): 100	S6;	664805999	NP_001287750.1	NKEEDCHsPTSKPPK	No
VIM	7431	vimentin [Homo sapiens]	S430	ETNLDsLPLVDTHSK	62414289	2×TMT6plex [N-Term; K15]; 1×Phospho [S6(100)]	62414289 1×Phospho [S430(100)]	5.51e-05	6.55e-05	1	1	26	62414289	62414289 [425-439]	0	2207.14	S6(Phospho): 100	1.06	2.5	3.54	1.34	0.92	7.17	1.37	3.15	3.26	1.51	1.2	6.95	6.31024	High	1.3e-05	2.56e-05	49.49	High	2.27e-05	1	S6(Phospho): 100	S6;	62414289	NP_003371.2	LRETNLDsLPLVDTH	Yes
GPRC5A	9052	retinoic acid-induced protein 3 [Homo sapiens]	S345	AHAWPsPYKDYEVK	4506403	3×TMT6plex [N-Term; K9; K14]; 1×Phospho [S6(99.2)]	4506403 1×Phospho [S345(99.2)]	0.000554484	0.000193352	1	1	8	4506403	4506403 [340-353]	1	2458.28	S6(Phospho): 99.15	1.32	3.38	2.44	1.92	1.09	1.47	1.46	3.65	2.82	2.34	1.43	1.67	4.59798	High	6.84e-05	0.0002802	9.11	High	0.0001777	1	S6(Phospho): 99.15	S6;	4506403	NP_003970.1	PRAHAWPsPYKDYEV	Yes
MAP1B	4131	microtubule-associated protein 1B [Homo sapiens]	S1501	KLGDVsPTQIDVSQFGSFK	153945728	3×TMT6plex [N-Term; K19; K]; 2×Deamidated [Q9; Q14]; 1×Phospho [S6(100)]	153945728 1×Phospho [S1501(100)]	0.000235525	0.000147488	1	1	15	153945728	153945728 [1496-1514]	1	2822.48	S6(Phospho): 99.98	2.46	8.7	2.73	1.04	0.99	1.44	1.78	5.36	2.06	0.91	0.83	1.32	5.35641	High	5.25e-05	0.0001557	34.07	High	0.0001505	1	S6(Phospho): 99.98	S6;	153945728	NP_005900.2	ERKLGDVsPTQIDVS	Yes
AHNAK2	113146	protein AHNAK2 [Homo sapiens]	S593	IPSLGWsPSK	156766050	2×TMT6plex [N-Term; K10]; 1×Phospho [S7(100)]	156766050 1×Phospho [S593(100)]	0.056702	0.00250138	1	1	13	156766050	156766050 [587-596]	0	1609.88	S7(Phospho): 100	3.64	0.76	2.12	1.1	0.94	0.71	3.9	0.92	2.43	1.2	1.07	0.88	3.40147	High	0.001344	0.02383	27.6	High	0.003784	1	S7(Phospho): 100	S7;	156766050	NP_612429.2	KIPSLGWsPSKHTKT	Yes
FERMT2	10979	fermitin family homolog 2 isoform 2 [Homo sapiens]	S673	AKDQNEsLDEEMFYK	201861813	3×TMT6plex [N-Term; K2; K15]; 1×Phospho [S7(100)]	201861813 1×Phospho [S673(100)]	0.00330821	0.000383028	1	2	4	201861813; 29789006	201861813 [667-681]	1	2614.27	S7(Phospho): 100	1.86	3.13	1.65	1.39	0.95	2.29	1.98	3.58	1.7	1.24	0.97	2.49	3.77314	High	0.0001218	0.0006055	14.2	High	0.0004855	1	S7(Phospho): 100	S7;	201861813	NP_001128471.1	RAKDQNEsLDEEMFY	No
MAP1B	4131	microtubule-associated protein 1B [Homo sapiens]	S1797	ESSPLYsPTFSDSTSAVK	153945728	2×TMT6plex [N-Term; K18]; 1×Phospho [S2(99)]	153945728 1×Phospho [S1792(99)]	0.00028029	0.000147488	1	1	30	153945728	153945728 [1791-1808]	0	2441.19	S7(Phospho): 98.93	2.36	7.22	2.01	1.08	0.72	0.83	1.03	2.14	1.07	0.67	0.7	0.76	4.13401	High	2.03e-05	9.58e-05	38.72	High	6.51e-05	1	S7(Phospho): 98.93	S7;	153945728	NP_005900.2	RESSPLYsPTFSDST	Yes
HNF1B	6928	hepatocyte nuclear factor 1-beta isoform 1 [Homo sapiens]	S49	LETLPLsPGSGAEPDTKPVFHTLTNGHAK	4507397	3×TMT6plex [N-Term; K17; K29]; 1×Deamidated [N25]; 1×Phospho [S7(99.9)]	4507397 1×Phospho [S49(99.9)]	4.51e-05	6.55e-05	1	3	6	747165384; 260064065; 4507397	4507397 [43-71]	0	3783	S7(Phospho): 99.93	1.16	1.96	6.46	0.98	2.01	2.8	0.98	1.14	6.13	0.82	0.86	1.99	6.96601	High	1.3e-05	1.98e-05	21.55	High	2.27e-05	1	S7(Phospho): 99.93	S7;	4507397	NP_000449.1	KLETLPLsPGSGAEP	Yes
SLC9A3R2	9351	Na(+)/H(+) exchange regulatory cofactor NHE-RF2 isoform c [Homo sapiens]	S20	APGAPPRsPPQR	355330268	1×TMT6plex [N-Term]; 1×Phospho [S8(100)]	355330268 1×Phospho [S20(100)]	0.00381127	0.000383028	1	3	10	355330272; 355330270; 355330268	355330268 [13-24]	1	1539.8	S8(Phospho): 100	1.92	4.16	1.2	1.18	1	4.6	2.24	3.76	1.54	1.5	1.59	4.93	3.79808	High	0.0002163	0.002251	6.03	High	0.009263	1	S8(Phospho): 100	S8;	355330268	NP_001239002.1	APGAPPRsPPQRLVQ	Yes
CDCA3	83461	cell division cycle-associated protein 3 isoform 1 [Homo sapiens]	S87	TSSGDPPsPLVK	13876384	2×TMT6plex [N-Term; K12]; 1×Phospho [S8(100)]	13876384 1×Phospho [S87(100)]	0.00787956	0.000571669	1	3	2	662236834; 662236836; 13876384	13876384 [80-91]	0	1722.91	S8(Phospho): 100	1.55	1.39	2.36	1	2.53	2.26							2.65507	High	0.0001561	0.001323	11.15	High	0.0004087	1	S8(Phospho): 100	S8;	13876384	NP_112589.1	TSSGDPPsPLVKQLS	Yes
MYOF	26509	myoferlin isoform a [Homo sapiens]	S1915	HTIIPAKsPEK	7305053	3×TMT6plex [N-Term; K7; K11]; 1×Phospho [S8(100)]	7305053 1×Phospho [S1915(100)]	0.00199232	0.000261096	1	2	3	7305053; 19718759	7305053 [1908-1918]	1	1988.15	S8(Phospho): 100	1.55	1.35	1.96	2.27	2.02	3.04							3.45385	High	0.0001106	0.0005098	3.91	High	0.0001196	1	S8(Phospho): 100	S8;	7305053	NP_038479.1	HTIIPAKsPEKCRLD	Yes
SYAP1	94056	synapse-associated protein 1 [Homo sapiens]	T248	tPPVVIK	19923855	2×TMT6plex [N-Term; K7]; 1×Phospho [T1(100)]	19923855 1×Phospho [T248(100)]	0.0347446	0.00179354	1	1	9	19923855	19923855 [248-254]	0	1291.78	T1(Phospho): 100	3.07	1.82	1.43	1.73	2.3	1.79	2.71	1.72	1.14	1.5	2.05	1.67	3.34908	High	0.001288	0.02271	20.68	High	0.004331	1	T1(Phospho): 100	T1;	19923855	NP_116185.2	AEAVRPKtPPVVIKS	Yes
SEC14L1	6397	SEC14-like protein 1 isoform b [Homo sapiens]	T234	EGLSGDALSSPSAPEPVVGtPDDKLDADYIK	325197234	3×TMT6plex [N-Term; K24; K31]; 1×Phospho [T20(100)]	325197234 1×Phospho [T234(100)]	7.96e-05	9e-05	1	3	4	325197234; 325197236; 221316687	325197234 [215-245]	1	3910.98	T20(Phospho): 100	1.77	2.5	2.13	2.07	1.45	1.39							6.15373	High	2.03e-05	3.27e-05	18.9	High	8.36e-05	1	T20(Phospho): 100	T20;	325197234	NP_001191337.1	APEPVVGtPDDKLDA	Yes
PVRL2	5819	nectin-2 isoform delta precursor [Homo sapiens]	T410	KEQTLQGAEEDEDLEGPPSYKPPtPK	112789532	4×TMT6plex [N-Term; K21; K26; K]; 1×Deamidated [Q]; 1×Phospho [T24(100)]	112789532 1×Phospho [T410(100)]	0.12441	0.00631808	1	1	3	112789532	112789532 [387-412]	1	3880.99	T24(Phospho): 100	1.95	2.22	1.68	2.74	2.04	1.8							4.01476	High	0.00352	0.07014	17.66	High	0.005827	1	T24(Phospho): 100	T24;	112789532	NP_001036189.1	PPSYKPPtPKAKLEA	Yes
LARP1	23367	la-related protein 1 [Homo sapiens]	T449	AVtPVPTK	39725634	2×TMT6plex [N-Term; K8]; 1×Phospho [T3(100)]	39725634 1×Phospho [T449(100)]	0.0240999	0.00137655	1	1	14	39725634	39725634 [447-454]	0	1350.78	T3(Phospho): 100	1.64	2.86	1.77	1.46	2.43	1.29	1.27	1.48	1.72	1.38	2.15	1.22	2.58276	High	0.007748	0.1658	23.13	High	0.0003411	1	T3(Phospho): 100	T3;	39725634	NP_056130.2	PGSPRAVtPVPTKTE	No
LIMA1	51474	LIM domain and actin-binding protein 1 isoform 1 [Homo sapiens]	S710	SLNWSsFVDNTFAEEFTTQNQK	165905589	2×TMT6plex [N-Term; K22]; 1×Phospho [S6(98.7)]	165905589 1×Phospho [S710(98.7)]	7.44e-05	9e-05	1	4	49	165905589; 7705373; 165905591; 344313201	165905589 [705-726]	0	3131.48	S6(Phospho): 98.68	0.49	0.88	0.48	4.37	1.37	0.49	0.53	1.04	0.56	2.59	1.14	0.64	6.31374	High	2.03e-05	3.22e-05	46.7	High	5.72e-05	1	S6(Phospho): 98.68	S6;	165905589	NP_001107018.1	PKSLNWSsFVDNTFA	No
WAPAL	23063	wings apart-like protein homolog [Homo sapiens]	S1069	DAPTTQHDKsGEWQETSGEIQWVSTEK	42734325	3×TMT6plex [N-Term; K9; K27]; 2×Deamidated [Q14; Q]; 1×Phospho [S10(93.3)]	42734325 1×Phospho [S1069(93.3)]	0.00214307	0.000261096	1	1	6	42734325	42734325 [1060-1086]	1	3843.82	S10(Phospho): 93.27	2.35	1.06	1.64	0.49	1.62	1.46							4.93846	High	0.0001218	0.0006233	15.7	High	0.001442	1	S10(Phospho): 93.27	S10;	42734325	NP_055860.1	PTTQHDKsGEWQETS	Yes
SF3B1	23451	splicing factor 3B subunit 1 isoform 1 [Homo sapiens]	T142	LDPFADGGKtPDPK	54112117	3×TMT6plex [N-Term; K9; K14]; 1×Phospho [T10(100)]	54112117 1×Phospho [T142(100)]	0.0312035	0.00168507	1	1	7	54112117	54112117 [133-146]	1	2225.18	T10(Phospho): 100	0.33	1.12	1.9	1.59	1.62	2.28	0.31	1.02	1.49	1.36	1.29	1.84	3.73526	High	0.0004	0.005245	3.72	High	0.002431	1	T10(Phospho): 100	T10;	54112117	NP_036565.2	PFADGGKtPDPKMNA	Yes
PRKCH	5583	protein kinase C eta type [Homo sapiens]	T656	EDVSNFDPDFIKEEPVLtPIDEGHLPMINQDEFR	28557781	2×TMT6plex [N-Term; K12]; 2×Deamidated [N/Q]; 1×Phospho [T18(100)]	28557781 1×Phospho [T656(100)]	0.00548644	0.000453644	1	1	4	28557781	28557781 [639-672]	1	4526.14	T18(Phospho): 100	0.61	0.51	2.07	1.76	2.63	1.23							3.50011	High	0.0003502	0.004221	2.7	High	0.0002679	1	T18(Phospho): 100	T18;	28557781	NP_006246.2	IKEEPVLtPIDEGHL	Yes
MKI67	4288	antigen KI-67 isoform 1 [Homo sapiens]	S2223	sPQPDPVGTPTIFKPQSK	103472005	3×TMT6plex [N-Term; K14; K18]; 1×Phospho [S1(100)]	103472005 1×Phospho [S2223(100)]	6.23e-05	6.55e-05	1	2	6	103472005; 225543215	103472005 [2223-2240]	0	2691.47	S1(Phospho): 100	2.56	2.18	1.49	1.36	1.68	1.4	2.64	2.11	2.03	1.26	1.79	1.61	6.54817	High	1.3e-05	2.74e-05	23.81	High	7.92e-05	1	S1(Phospho): 100	S1;	103472005	NP_002408.3	TTKIACRsPQPDPVG	Yes
CDCA5	113130	sororin [Homo sapiens]	S33	sGSELPSILPEIWPK	18087845	2×TMT6plex [N-Term; K15]; 1×Phospho [S1(100)]	18087845 1×Phospho [S33(100)]	0.00692487	0.000523051	1	1	3	18087845	18087845 [33-47]	0	2191.18	S1(Phospho): 100	1.88	1.45	2.54	1.01	1.22	1.54							3.14587	High	0.0001686	0.001405	18.45	High	0.0003887	1	S1(Phospho): 100	S1;	18087845	NP_542399.1	LRRSQRKsGSELPSI	Yes
DNM1	1759	dynamin-1 isoform 4 [Homo sapiens]	S774	sPTSSPTPQR	570359601	1×TMT6plex [N-Term]; 1×Phospho [S1(100)]	570359601 1×Phospho [S774(100)]	0.0710989	0.00330824	1	4	2	59853099; 56549117; 570359601; 570359599	570359601 [774-783]	0	1366.66	S1(Phospho): 100	1.58	1.77	2.19	1.16	1.47	1.28							2.1121	High	0.0007832	0.01266	6.83	High	0.002476	1	S1(Phospho): 100	S1;	570359601	NP_001275668.1	SVPAGRRsPTSSPTP	Yes
C15orf52	388115	uncharacterized protein C15orf52 [Homo sapiens]	S201	sPPTQVAISSDSAR	155029552	1×TMT6plex [N-Term]; 1×Phospho [S1(100)]	155029552 1×Phospho [S201(100)]	0.000166961	0.00012481	1	1	5	155029552	155029552 [201-214]	0	1724.84	S1(Phospho): 99.99	1.4	2.33	1.36	2.15	1.53	1.76							4.40084	High	2.03e-05	5.58e-05	27.2	High	0.0001068	1	S1(Phospho): 99.99	S1;	155029552	NP_997263.2	PGGRVTRsPPTQVAI	Yes
ARHGAP32	9743	rho GTPase-activating protein 32 isoform 1 [Homo sapiens]	S871	LSPFFTLDLsPTEDK	218083800	2×TMT6plex [N-Term; K15]; 1×Phospho [S10(100)]	218083800 1×Phospho [S871(100)]	0.000274773	0.000147488	1	2	4	29469071; 218083800	218083800 [862-876]	0	2248.16	S10(Phospho): 100	2.11	0.84	1.17	2.85	1.65	0.76	2.15	1.12	1.25	2.61	1.71	0.97	4.5314	High	2.62e-05	0.0001041	49.39	High	6.51e-05	1	S10(Phospho): 100	S10;	218083800	NP_001136157.1	PFFTLDLsPTEDKSS	Yes
RPTOR	57521	regulatory-associated protein of mTOR isoform 1 [Homo sapiens]	S877	GVHIHQAGGsPPASSTSSSSLTNDVAK	22094987	2×TMT6plex [N-Term; K27]; 1×Deamidated [N23]; 1×Phospho [S10(100)]	22094987 1×Phospho [S877(100)]	0.000130327	9e-05	1	2	2	251823858; 22094987	22094987 [868-894]	0	3131.54	S10(Phospho): 100	2.09	2.23	1.41	1.67	1.55	1.64							4.67977	High	2.03e-05	4.58e-05	13.96	High	6.51e-05	1	S10(Phospho): 100	S10;	22094987	NP_065812.1	HIHQAGGsPPASSTS	Yes
CHAMP1	283489	chromosome alignment-maintaining phosphoprotein 1 [Homo sapiens]	S507	KPGPSGPSEsPK	41281612	3×TMT6plex [N-Term; K12; K]; 1×Phospho [S10(100)]	41281612 1×Phospho [S507(100)]	0.000831599	0.000193352	1	1	14	41281612	41281612 [498-509]	0	1935.06	S10(Phospho): 99.99	2.17	1.73	1.59	1.34	1.63	1.95	2.63	1.86	1.64	1.61	2.28	3.29	4.7554	High	6.84e-05	0.0002847	25.56	High	0.0001583	1	S10(Phospho): 99.99	S10;	41281612	NP_115812.1	GPSGPSEsPKAASDI	Yes
MARCKSL1	65108	MARCKS-related protein [Homo sapiens]	S22	GDVTAEEAAGAsPAKANGQENGHVK	13491174	3×TMT6plex [N-Term; K15; K25]; 1×Phospho [S12(100)]	13491174 1×Phospho [S22(100)]	7.51e-05	9e-05	1	1	2	13491174	13491174 [11-35]	1	3175.6	S12(Phospho): 100	2.26	2.81	1.49	1.09	1.18	1.58							6.71328	High	2.03e-05	3.14e-05	24.29	High	7.11e-05	1	S12(Phospho): 100	S12;	13491174	NP_075385.1	AEEAAGAsPAKANGQ	Yes
WIZ	58525	protein Wiz [Homo sapiens]	S660	AADGGERPLAAsPPGTVK	151301215	2×TMT6plex [N-Term; K18]; 1×Phospho [S12(100)]	151301215 1×Phospho [S660(100)]	0.000331447	0.000147488	1	1	4	151301215	151301215 [649-666]	0	2232.18	S12(Phospho): 100	2.16	1.46	1.28	1.08	1.31	1.53	2.02	1.57	1.32	1.22	1.4	1.67	4.02901	High	2.62e-05	0.000101	12.62	High	7.92e-05	1	S12(Phospho): 100	S12;	151301215	NP_067064.2	GERPLAAsPPGTVKA	No
EIF2AK1	27102	eukaryotic translation initiation factor 2-alpha kinase 1 isoform a [Homo sapiens]	S258	AAIELPSLEVLsDQEEDREQCGVK	11125768	2×TMT6plex [N-Term; K24]; 1×Carbamidomethyl [C21]; 1×Phospho [S12(100)]	11125768 1×Phospho [S258(100)]	6.59e-05	6.55e-05	1	2	6	11125768; 197245437	11125768 [247-270]	1	3253.61	S12(Phospho): 100	1.5	2.31	1.63	1.63	1.45	1.33							5.734	High	1.3e-05	2.86e-05	38.68	High	6.51e-05	1	S12(Phospho): 100	S12;	11125768	NP_055228.2	LPSLEVLsDQEEDRE	Yes
AKAP11	11215	A-kinase anchor protein 11 [Homo sapiens]	S433	KPESPYGNLCDAPDsPRPVK	7706457	3×TMT6plex [N-Term; K20; K]; 1×Carbamidomethyl [C10]; 1×Phospho [S15(100)]	7706457 1×Phospho [S433(100)]	5.82e-05	6.55e-05	1	1	10	7706457	7706457 [419-438]	0	2994.54	S15(Phospho): 100	2.19	2.13	1.19	1.38	1.22	1.4	2.42	2.36	1.46	1.45	1.54	1.93	6.27732	High	1.3e-05	2.61e-05	20.99	High	5.72e-05	1	S15(Phospho): 100	S15;	7706457	NP_057332.1	NLCDAPDsPRPVKAS	Yes
SPTBN1	6711	spectrin beta chain, non-erythrocytic 1 isoform 1 [Homo sapiens]	S2341	AQTLPTSVVTITSESsPGK	112382250	2×TMT6plex [N-Term; K19]; 1×Phospho [S16(100)]	112382250 1×Phospho [S2341(100)]	4.33e-05	6.55e-05	1	1	16	112382250	112382250 [2326-2344]	0	2441.29	S16(Phospho): 100	1.11	1.56	2.07	1.25	2.62	1.81	0.98	1.64	2.01	1.9	3.05	1.96	6.44507	High	0	1.79e-05	31.5	High	1.91e-05	1	S16(Phospho): 100	S16;	112382250	NP_003119.2	VTITSESsPGKREKD	Yes
HLA-A	3105	HLA class I histocompatibility antigen, A-1 alpha chain precursor [Homo sapiens]	S356	KGGSYTQAASSDSAQGsDVSLTACK	24797067	3×TMT6plex [N-Term; K25; K]; 1×Carbamidomethyl [C24]; 1×Phospho [S17(100)]	24797067 1×Phospho [S356(100)]	4.31e-05	6.55e-05	1	2	8	337752170; 24797067	24797067 [340-364]	1	3243.58	S17(Phospho): 99.98	0.96	1.27	1.06	3.2	0.86	4.16	0.9	2.26	1.09	1.3	0.85	2.07	6.44185	High	0	1.75e-05	41.27	High	2.27e-05	1	S17(Phospho): 99.98	S17;	24797067	NP_002107.3	SSDSAQGsDVSLTAC	Yes
RNF214	257160	RING finger protein 214 isoform 1 [Homo sapiens]	S500	SLSFPILNPALSQPSQPsSPLPGSHGR	116235451	1×TMT6plex [N-Term]; 1×Phospho [S18(94.8)]	116235451 1×Phospho [S500(94.8)]	0.000966199	0.000214298	1	2	6	116235451; 503775288	116235451 [483-509]	0	3080.58	S18(Phospho): 94.75	1.49	2.62	1.22	4.1	0.97	1.78							2.90986	High	5.93e-05	0.0002291	4.76	High	0.0001505	1	S18(Phospho): 94.75	S18;	116235451	NP_997226.2	LSQPSQPsSPLPGSH	Yes
GPRIN1	114787	G protein-regulated inducer of neurite outgrowth 1 [Homo sapiens]	S615	GsPVTTTK	112821681	2×TMT6plex [N-Term; K8]; 1×Phospho [S2(100)]	112821681 1×Phospho [S615(100)]	0.115395	0.00568768	1	1	6	112821681	112821681 [614-621]	0	1328.72	S2(Phospho): 100	2.4	1.17	1.64	1.04	1.24	2.05	3.22	1.46	2.11	0.98	1.53	1.99	2.69309	High	0.001241	0.02191	17.17	High	0.002734	1	S2(Phospho): 100	S2;	112821681	NP_443131.2	SLPLEKGsPVTTTKA	Yes
SPIN1	10927	spindlin-1 [Homo sapiens]	S124	IsDAHLADTMIGK	112293285	2×TMT6plex [N-Term; K13]; 1×Phospho [S2(100)]	112293285 1×Phospho [S124(100)]	0.000107101	9e-05	1	1	4	112293285	112293285 [123-135]	0	1909.99	S2(Phospho): 100	1.58	1.75	1.89	1.26	1.39	2.26	1.87	2.14	2.45	2.12	2.2	2.22	5.08873	High	2.03e-05	3.97e-05	34.48	High	6.51e-05	1	S2(Phospho): 100	S2;	112293285	NP_006708.2	RVATSRIsDAHLADT	Yes
H3F3A	3020	histone H3.3 [Homo sapiens]	S29	KsAPSTGGVK	4504279	3×TMT6plex [N-Term; K10; K]; 1×Phospho [S2(100)]	4504279 1×Phospho [S29(100)]	0.0120765	0.000778694	1	1	1	4504279	4504279 [28-37]	1	1698.98	S2(Phospho): 100	1.21	1.88	2.42	1.19	1.14	1.9							3.15966	High	0.0002059	0.001999					S2(Phospho): 100	S2;	4504279	NP_002098.1	ATKAARKsAPSTGGV	Yes
TACC3	10460	transforming acidic coiled-coil-containing protein 3 [Homo sapiens]	S402	GsYHLDWDK	5454102	2×TMT6plex [N-Term; K9]; 1×Phospho [S2(99.3)]	5454102 1×Phospho [S402(99.3)]	0.0613081	0.00276584	1	1	2	5454102	5454102 [401-409]	0	1658.8	S2(Phospho): 99.32	1.04	3.59	1.66	1.21	1.79	1.71							2.52981	High	0.001427	0.02606	8.65	High	0.0006813	1	S2(Phospho): 99.32	S2;	5454102	NP_006333.1	PMPASRGsYHLDWDK	Yes
C10orf12	26148	uncharacterized protein C10orf12 [Homo sapiens]	S273	EDNPEEPSKEITSHEEGGGDVsPR	24431975	2×TMT6plex [N-Term; K9]; 1×Phospho [S22(100)]	24431975 1×Phospho [S273(100)]	0.000114292	9e-05	1	1	8	24431975	24431975 [252-275]	1	3133.44	S22(Phospho): 100	2.18	1.63	1.83	1.1	2.27	1.61	2.13	2.07	1.94	1.25	2.46	1.75	5.9991	High	2.03e-05	4.16e-05	18.12	High	7.11e-05	1	S22(Phospho): 100	S22;	24431975	NP_056467.2	EEGGGDVsPRKEPQE	Yes
GEMIN5	25929	gem-associated protein 5 isoform 1 [Homo sapiens]	S778	LESIDGNEEESMKENSGPVENGVsDQEGEEQAR	157739942	2×TMT6plex [N-Term; K13]; 2×Deamidated [N15; N21]; 1×Oxidation [M12]; 1×Phospho [S24(99.9)]	157739942 1×Phospho [S778(99.9)]	0.000271176	0.000147488	1	2	2	356461016; 157739942	157739942 [755-787]	1	4148.8	S24(Phospho): 99.9	2.15	1.78	1.42	1.2	1.56	1.09							3.78911	High	2.03e-05	8.48e-05	19.95	High	8.27e-05	1	S24(Phospho): 99.9	S24;	157739942	NP_056280.2	GPVENGVsDQEGEEQ	Yes
ANLN	54443	actin-binding protein anillin isoform 1 [Homo sapiens]	S72	RCsDNTEVEVSNLENK	31657094	2×TMT6plex [N-Term; K16]; 1×Carbamidomethyl [C2]; 1×Phospho [S3(100)]	31657094 1×Phospho [S72(100)]	5.43e-05	6.55e-05	1	3	11	546231404; 31657094; 546231137	31657094 [70-85]	1	2432.15	S3(Phospho): 100	2.43	1.82	1.94	1.31	1.85	2.04	1.58	1.17	1.37	1	1.41	1.5	6.77719	High	2.03e-05	3.38e-05	46.34	High	8.36e-05	1	S3(Phospho): 100	S3;	31657094	NP_061155.2	SPSKKRCsDNTEVEV	Yes
PNN	5411	pinin [Homo sapiens]	S443	SLsPGKENVSALDMEK	33356174	3×TMT6plex [N-Term; K6; K16]; 1×Phospho [S3(100)]	33356174 1×Phospho [S443(100)]	0.000124602	9e-05	1	1	23	33356174	33356174 [441-456]	1	2472.3	S3(Phospho): 100	1.51	1.55	1.7	1.83	2.63	1.98	1.22	1.25	1.77	1.8	2.03	1.72	6.00133	High	2.62e-05	0.0001027	27.11	High	0.0001746	1	S3(Phospho): 100	S3;	33356174	NP_002678.2	DKECKSLsPGKENVS	Yes
FAM129A	116496	protein Niban [Homo sapiens]	S602	RAsAILPGVLGSETLSNEVFQESEEEK	16757970	2×TMT6plex [N-Term; K27]; 1×Phospho [S3(100)]	16757970 1×Phospho [S602(100)]	4.32e-05	6.55e-05	1	1	10	16757970	16757970 [600-626]	1	3457.75	S3(Phospho): 100	1.2	2.11	2.2	1.47	0.8	1.52	1.22	1.79	2.02	1.45	0.77	1.63	8.15382	High	0	1.77e-05	55.2	High	2.27e-05	1	S3(Phospho): 100	S3;	16757970	NP_443198.1	ASPARRAsAILPGVL	Yes
KMT2A	4297	histone-lysine N-methyltransferase 2A isoform 1 precursor [Homo sapiens]	S3530	SAsPSVPGPTKPKPK	308199413	4×TMT6plex [N-Term; K11; K13; K15]; 1×Phospho [S3(96.5)]	308199413 1×Phospho [S3530(96.5)]	0.0085575	0.00064256	1	2	1	56550039; 308199413	308199413 [3528-3542]	0	2474.46	S3(Phospho): 96.49	2.2	2.76	1.83	1.58	1.24	1.99							2.8964	High	0.0001764	0.001425					S3(Phospho): 96.49	S3;	308199413	NP_001184033.1	SSGQRSAsPSVPGPT	No
CFL1	1072	cofilin-1 [Homo sapiens]	S24	KSsTPEEVK	5031635	3×TMT6plex [N-Term; K9; K]; 1×Phospho [S3(100)]	5031635 1×Phospho [S24(100)]	0.0849877	0.00386261	1	1	22	5031635	5031635 [22-30]	1	1771.98	S3(Phospho): 99.99	2.03	1.44	1.99	1.65	1.81	1.97	2.15	1.75	2.17	1.38	1.62	1.98	3.37684	High	0.0009017	0.01539	8.31	High	0.004414	1	S3(Phospho): 99.99	S3;	5031635	NP_005498.1	DMKVRKSsTPEEVKK	Yes
MAP1S	55201	microtubule-associated protein 1S isoform 1 [Homo sapiens]	S731	SAsPHDVDLCLVSPCEFEHR	50428935	1×TMT6plex [N-Term]; 2×Carbamidomethyl [C10; C15]; 1×Phospho [S3(100)]	50428935 1×Phospho [S731(100)]	4.27e-05	6.55e-05	1	2	39	816197590; 50428935	50428935 [729-748]	0	2664.18	S3(Phospho): 99.99	1.8	2.35	2.39	1.92	1.68	1.95	1.65	1.52	1.51	1.21	1.16	1.57	8.44462	High	0	8.59e-06	70.62	High	1.91e-05	1	S3(Phospho): 99.99	S3;	50428935	NP_060644.4	PRARRSAsPHDVDLC	Yes
SCAF4	57466	splicing factor, arginine/serine-rich 15 isoform 1 [Homo sapiens]	S154	IEIIQPLLDMAAGTSNAAPVAENVTNNEGsPPPPVK	40789229	2×TMT6plex [N-Term; K36]; 2×Deamidated [N/Q]; 1×Oxidation [M10]; 1×Phospho [S30(99.8)]	40789229 1×Phospho [S154(99.8)]	9.25e-05	9e-05	1	3	18	224451133; 224451135; 40789229	40789229 [125-160]	0	4211.12	S30(Phospho): 99.84	1.73	0.87	1.69	2.3	1.27	2.03	0.86	0.52	0.54	0.56	0.7	0.78	5.74404	High	2.03e-05	3.6e-05	32.05	High	5.72e-05	1	S30(Phospho): 99.84	S30;	40789229	NP_065757.1	NVTNNEGsPPPPVKV	Yes
POLD3	10714	DNA polymerase delta subunit 3 [Homo sapiens]	S307	VALsDDETKETENMR	38492356	2×TMT6plex [N-Term; K9]; 1×Phospho [S4(100)]	38492356 1×Phospho [S307(100)]	0.00943119	0.000765738	1	1	21	38492356	38492356 [304-318]	1	2276.09	S4(Phospho): 100	2.57	0.92	1.93	1.24	1.43	1.31	1.96	0.87	1.75	1.24	1.28	1.58	3.92761	High	0.0002235	0.002319	22.9	High	0.0006089	1	S4(Phospho): 100	S4;	38492356	NP_006582.1	RGKRVALsDDETKET	Yes
EPB41L1	2036	band 4.1-like protein 1 isoform a [Homo sapiens]	S510	HQAsINELK	30061489	2×TMT6plex [N-Term; K9]; 1×Phospho [S4(100)]	30061489 1×Phospho [S510(100)]	0.00311379	0.00036439	1	4	10	385251401; 385251397; 385251399; 30061489	30061489 [507-515]	0	1577.85	S4(Phospho): 100	1.31	1.6	1.52	4.07	3.5	1.13	0.99	1.08	1.31	3.55	3.06	0.69	4.30502	High	0.0002348	0.002577	37.28	High	0.0001777	1	S4(Phospho): 100	S4;	30061489	NP_036288.2	VLLKHQAsINELKRT	Yes
TNIK	23043	TRAF2 and NCK-interacting protein kinase isoform 1 [Homo sapiens]	S769	SEGsPVLPHEPAK	55741807	2×TMT6plex [N-Term; K13]; 1×Phospho [S4(100)]	55741807 1×Phospho [S769(100)]	0.000662194	0.000193352	1	8	5	239735588; 239735590; 239735586; 239735580; 239735582; 239735592; 239735584; 55741807	55741807 [766-778]	0	1885.98	S4(Phospho): 99.15	0.81	2.13	2.22	0.66	1.16	1.16	1.34	2	1.91	0.85	1.15	1.33	3.97655	High	5.25e-05	0.0001728	25.82	High	0.0001264	1	S4(Phospho): 99.15	S4;	55741807	NP_055843.1	ANSKSEGsPVLPHEP	Yes
MKI67	4288	antigen KI-67 isoform 1 [Homo sapiens]	S2223	IACRsPQPDPVGTPTIFKPQSK	103472005	3×TMT6plex [N-Term; K18; K22]; 1×Carbamidomethyl [C3]; 1×Phospho [S5(100)]	103472005 1×Phospho [S2223(100)]	0.00364934	0.000383028	1	2	1	103472005; 225543215	103472005 [2219-2240]	1	3191.73	S5(Phospho): 100	2.03	1.07	1.56	1.11	1.59	1.55							3.99573	High	0.0001218	0.0006567					S5(Phospho): 100	S5;	103472005	NP_002408.3	TTKIACRsPQPDPVG	Yes
PHLDB1	23187	pleckstrin homology-like domain family B member 1 isoform a [Homo sapiens]	S489	EVAEsPRPR	221219024	1×TMT6plex [N-Term]; 1×Phospho [S5(100)]	221219024 1×Phospho [S489(100)]	0.0291299	0.00152767	1	2	4	221219024; 221219026	221219024 [485-493]	0	1349.68	S5(Phospho): 100	1.93	1.93	1.59	1.62	1.21	2.2	1.25	1.09	0.98	1.17	0.96	1.12	3.00099	High	0.00233	0.04588	14.52	High	0.0003738	1	S5(Phospho): 100	S5;	221219024	NP_001138230.1	LNREVAEsPRPRRWA	Yes
AKAP12	9590	A-kinase anchor protein 12 isoform 1 [Homo sapiens]	S381	VELPsEEQVSGSQGPSEEKPAPLATEVFDEK	21493022	3×TMT6plex [N-Term; K19; K31]; 1×Phospho [S5(100)]	21493022 1×Phospho [S381(100)]	4.27e-05	6.55e-05	1	2	14	21493022; 21493024	21493022 [377-407]	0	4081.05	S5(Phospho): 100	1.41	3.31	1.01	4.67	0.89	1.1	1.53	3.13	1.43	4.09	1.29	1.62	7.87471	High	0	1.41e-05	38.82	High	2.27e-05	1	S5(Phospho): 100	S5;	21493022	NP_005091.2	YEKVELPsEEQVSGS	Yes
ALPP	250	alkaline phosphatase, placental type preproprotein [Homo sapiens]	S114	HVPDsGATATAYLCGVK	94721246	2×TMT6plex [N-Term; K17]; 1×Carbamidomethyl [C14]; 1×Phospho [S5(100)]	94721246 1×Phospho [S114(100)]	7.29e-05	9e-05	1	2	15	94721246; 157266296	94721246 [110-126]	0	2285.14	S5(Phospho): 100	0.86	0.89	0.92	1.67	2.4	0.62	1.01	0.96	1.08	1.15	1.48	0.94	4.95591	High	2.03e-05	3.39e-05	40.24	High	5.72e-05	1	S5(Phospho): 100	S5;	94721246	NP_001623.3	VDKHVPDsGATATAY	Yes
CRTC3	64784	CREB-regulated transcription coactivator 3 isoform a [Homo sapiens]	S370	LFSLsNPSLSTTNLSGPSR	110431354	1×TMT6plex [N-Term]; 1×Phospho [S5(99)]	110431354 1×Phospho [S370(99)]	7.26e-05	9e-05	1	2	15	110431354; 110431352	110431354 [366-384]	0	2287.15	S5(Phospho): 99.02	1.3	2.17	1.42	1.2	2.02	1.11	0.92	1.04	0.78	1.03	0.74	0.91	4.9321	High	2.03e-05	3.07e-05	43.88	High	2.27e-05	1	S5(Phospho): 99.02	S5;	110431354	NP_073606.3	SLRLFSLsNPSLSTT	Yes
GPR39	2863	G-protein coupled receptor 39 [Homo sapiens]	S380; S384	VHAHsTTDsAR	4504097	1×TMT6plex [N-Term]; 2×Phospho [S5(100); S9(100)]	4504097 2×Phospho [S380(100); S384(100)]	0.0192548	0.00119956	1	1	3	4504097	4504097 [376-386]	0	1570.66	S5(Phospho): 99.96; S9(Phospho): 99.96	1.96	2.47	1.64	1.49	2.09	1.1							2.29354	High	0.00316	0.06204	5.03	High	0.0002949	1	S5(Phospho): 99.96; S9(Phospho): 99.96	S5; S9;	4504097	NP_001499.1	RLRVHAHsTTDSARF;HAHSTTDsARFVQRP	No;No
JARID2	3720	protein Jumonji isoform 1 [Homo sapiens]	S331	EVRPsPSK	11863152	2×TMT6plex [N-Term; K8]; 1×Phospho [S5(100)]	11863152 1×Phospho [S331(100)]	0.161087	0.00849461	1	2	3	388490158; 11863152	11863152 [327-334]	0	1437.79	S5(Phospho): 99.99	2.34	3.06	1.18	1	1.28	1.49	1.81	2.19	1.05	0.89	1.08	1.19	2.41581	High	0.003503	0.06962	3.76	High	0.001893	1	S5(Phospho): 99.99	S5;	11863152	NP_004964.2	KMREVRPsPSKTVKY	Yes
ZNF800	168850	zinc finger protein 800 [Homo sapiens]	S647	ANASNsPEGNK	39753953	2×TMT6plex [N-Term; K11]; 1×Phospho [S6(100)]	39753953 1×Phospho [S647(100)]	0.00131301	0.000214298	1	1	16	39753953	39753953 [642-652]	0	1626.79	S6(Phospho): 100	2.39	0.85	2.17	1.14	1.64	1.61	2.53	0.94	1.8	0.9	1.56	1.48	3.46838	High	0.0001218	0.0005438	29.94	High	0.0001068	1	S6(Phospho): 100	S6;	39753953	NP_789784.2	HKANASNsPEGNKTK	Yes
PRCC	5546	proline-rich protein PRCC [Homo sapiens]	S212	KPSDGsPDTKPSR	40807447	3×TMT6plex [N-Term; K10; K]; 1×Phospho [S6(100)]	40807447 1×Phospho [S212(100)]	0.00136817	0.000236062	1	1	6	40807447	40807447 [207-219]	0	2139.14	S6(Phospho): 100	2.06	1.6	1.43	1.23	1.82	1.39	2.79	2.8	2.47	1.92	3.35	2.61	4.43096	High	7.18e-05	0.0002995	10.69	High	0.00078	1	S6(Phospho): 100	S6;	40807447	NP_005964.3	SRKPSDGsPDTKPSR	Yes
C12orf45	121053	uncharacterized protein C12orf45 [Homo sapiens]	S178	IEVLDsPASK	116256458	2×TMT6plex [N-Term; K10]; 1×Phospho [S6(100)]	116256458 1×Phospho [S178(100)]	0.0405541	0.00201231	1	1	2	116256458	116256458 [173-182]	0	1596.87	S6(Phospho): 100	1.96	3.36	1.38	1.77	1.59	1.61							2.7646	High	0.0005952	0.008339	15.17	High	0.0004679	1	S6(Phospho): 100	S6;	116256458	NP_689531.2	GKIEVLDsPASKKKK	Yes
DSN1	79980	kinetochore-associated protein DSN1 homolog isoform 1 [Homo sapiens]	S58	IHLGSsPK	223972618	2×TMT6plex [N-Term; K8]; 1×Phospho [S6(99.6)]	223972618 1×Phospho [S58(99.6)]	0.00491183	0.000429788	1	2	10	223972618; 223890153	223972618 [53-60]	0	1376.77	S6(Phospho): 99.58	1.39	1.14	1.78	1.52	2.06	1.59	1.19	1.17	1.49	1.18	1.34	1.32	3.22188	High	0.0005244	0.006985	24.22	High	0.0001674	1	S6(Phospho): 99.58	S6;	223972618	NP_079194.3	ERIHLGSsPKKGGNC	Yes
AHNAK	79026	neuroblast differentiation-associated protein AHNAK isoform 1 [Homo sapiens]	S5731; S5739	GGVTGsPEASISGsKGDLK	61743954	3×TMT6plex [N-Term; K15; K19]; 2×Phospho [S6(100); S14(100)]	61743954 2×Phospho [S5731(100); S5739(100)]	0.0946643	0.00433044	1	1	3	61743954	61743954 [5726-5744]	1	2594.31	S6(Phospho): 99.98; S14(Phospho): 99.96	2.33	1.53	1.75	0.98	2.54	1.95							2.37354	High	0.004614	0.09559	7.15	High	0.001512	1	S6(Phospho): 99.98; S14(Phospho): 99.96	S6; S14;	61743954	NP_001611.1	GKGGVTGsPEASISG;PEASISGsKGDLKSS	Yes;Yes
ZNF800	168850	zinc finger protein 800 [Homo sapiens]	S595	HDGTSNsPSK	39753953	2×TMT6plex [N-Term; K10]; 1×Phospho [S7(100)]	39753953 1×Phospho [S595(100)]	0.00011036	9e-05	1	1	4	39753953	39753953 [589-598]	0	1567.75	S7(Phospho): 100	3.34	0.84	3.07	1.2	1.78	1.87	2.65	0.82	2.87	1.31	1.93	2.27	4.46264	High	2.62e-05	0.0001083	31.19	High	7.92e-05	1	S7(Phospho): 100	S7;	39753953	NP_789784.2	KHDGTSNsPSKKYEV	No
CHAMP1	283489	chromosome alignment-maintaining phosphoprotein 1 [Homo sapiens]	S427; S432; S436	KPGPPLsPEIRsPAGsPELR	41281612	2×TMT6plex [N-Term; K]; 3×Phospho [S7(100); S12(100); S16(100)]	41281612 3×Phospho [S427(100); S432(100); S436(100)]	0.00969856	0.000765738	1	1	4	41281612	41281612 [421-440]	1	2783.37	S7(Phospho): 100; S12(Phospho): 100; S16(Phospho): 100	2.26	2	1.9	1.39	1.67	1.66							5.15638	High	0.0001912	0.001615	4.5	High	0.001737	1	S7(Phospho): 100; S12(Phospho): 100; S16(Phospho): 100	S7; S12; S16;	41281612	NP_115812.1	RKPGPPLsPEIRSPA;PLSPEIRsPAGSPEL;EIRSPAGsPELRKPS	Yes;Yes;Yes
MKI67	4288	antigen KI-67 isoform 1 [Homo sapiens]	S2466	ITEVSCKsPQPESFK	103472005	3×TMT6plex [N-Term; K7; K15]; 1×Carbamidomethyl [C6]; 1×Phospho [S8(100)]	103472005 1×Phospho [S2466(100)]	0.00307652	0.00036439	1	2	5	103472005; 225543215	103472005 [2459-2473]	1	2504.31	S8(Phospho): 100	1.9	1.24	2.18	1.26	1.67	1.39	1.64	1.08	1.44	1.18	1.57	1.43	3.75462	High	0.0001218	0.0005708	8.44	High	0.0001505	1	S8(Phospho): 100	S8;	103472005	NP_002408.3	ITEVSCKsPQPESFK	Yes
RASAL2	9462	ras GTPase-activating protein nGAP isoform 2 [Homo sapiens]	S159	LEVPAERsPR	226958575	1×TMT6plex [N-Term]; 1×Phospho [S8(100)]	226958575 1×Phospho [S159(100)]	0.00168093	0.000236062	1	1	8	226958575	226958575 [152-161]	1	1462.76	S8(Phospho): 100	1.86	2.02	2.44	1.37	1.18	1.4	1.68	2.27	2.89	1.44	1.7	1.28	5.1573	High	7.41e-05	0.0003509	19.27	High	0.0001895	1	S8(Phospho): 100	S8;	226958575	NP_733793.2	LEVPAERsPRRRSIS	Yes
PAICS	10606	multifunctional protein ADE2 isoform 1 [Homo sapiens]	S27	EVYELLDsPGK	119220559	2×TMT6plex [N-Term; K11]; 1×Phospho [S8(100)]	119220559 1×Phospho [S27(100)]	0.000483313	0.000193352	1	2	18	5453539; 119220559	119220559 [20-30]	0	1787.92	S8(Phospho): 100	1.82	1.93	1.92	1.21	2.61	1.78	1.1	1.4	1.19	0.96	1.76	1.42	4.36472	High	0.0001218	0.0007116	38.93	High	8.36e-05	1	S8(Phospho): 100	S8;	119220559	NP_001072993.1	EVYELLDsPGKVLLQ	Yes
H1FX	8971	histone H1x [Homo sapiens]	S31	AGGSAALsPSKK	5174449	3×TMT6plex [N-Term; K11; K12]; 1×Phospho [S8(100)]	5174449 1×Phospho [S31(100)]	0.00520705	0.000429788	1	1	3	5174449	5174449 [24-35]	1	1841.05	S8(Phospho): 100	1.78	1.08	2.74	1.45	1.9	1.13							3.69187	High	0.0001218	0.0008954	14.05	High	0.0001674	1	S8(Phospho): 100	S8;	5174449	NP_006017.1	AGGSAALsPSKKRKN	Yes
NOP58	51602	nucleolar protein 58 [Homo sapiens]	S502; S514	HIKEEPLsEEEPCTSTAIAsPEK	7706254	3×TMT6plex [N-Term; K3; K23]; 1×Carbamidomethyl [C13]; 2×Phospho [S8(100); S20(100)]	7706254 2×Phospho [S502(100); S514(100)]	0.000191489	0.00012481	1	1	12	7706254	7706254 [495-517]	1	3429.65	S8(Phospho): 100; S20(Phospho): 100	1.96	1.07	1.55	0.93	2.18	1.55	2.29	1.37	1.93	1.3	2.39	1.62	6.76733	High	5.25e-05	0.0001463	45.43	High	5.72e-05	1	S8(Phospho): 100; S20(Phospho): 100	S8; S20;	7706254	NP_057018.1	HIKEEPLsEEEPCTS;CTSTAIAsPEKKKKK	Yes;Yes
TP53BP1	7158	tumor suppressor p53-binding protein 1 isoform 1 [Homo sapiens]	S1763; S1764	LPDGPTGssEEEEEFLEIPPFNK	213972636	2×TMT6plex [N-Term; K23]; 2×Phospho [S8(99.9); S9(99.9)]	213972636 2×Phospho [S1763(99.9); S1764(99.9)]	0.00400659	0.000383028	1	3	17	5032189; 213972634; 213972636	213972636 [1756-1778]	0	3179.45	S8(Phospho): 97.84; S9(Phospho): 99.95	2.77	2.74	1.67	1.42	1.51	1.71	1	1.27	0.66	1	0.79	0.99	3.33807	High	0.0001218	0.0007125	13.57	High	0.000769	1	S8(Phospho): 97.84; S9(Phospho): 99.95	S8; S9;	213972636	NP_001135452.1	LPDGPTGsSEEEEEF;PDGPTGSsEEEEEFL	No;No
AFAP1	60312	actin filament-associated protein 1 isoform A [Homo sapiens]	S795	SQAAPGSsPCR	197382472	1×TMT6plex [N-Term]; 1×Deamidated [Q2]; 1×Carbamidomethyl [C10]; 1×Phospho [S8(99)]	197382472 1×Phospho [S795(99)]	0.0331777	0.00172654	1	2	4	40807504; 197382472	197382472 [788-798]	0	1427.62	S8(Phospho): 99.01	1.14	2.22	1.12	0.94	1.29	2.37							2.29696	High	0.0007832	0.01268	19.31	High	0.0004065	1	S8(Phospho): 99.01	S8;	197382472	NP_001128119.1	SQAAPGSsPCRGHVL	No
MTA1	9112	metastasis-associated protein MTA1 isoform MTA1 [Homo sapiens]	S576	VAPVINNGsPTILGK	115527080	2×TMT6plex [N-Term; K15]; 1×Deamidated [N]; 1×Phospho [S9(99.2)]	115527080 1×Phospho [S576(99.2)]	0.000159933	9e-05	1	1	29	115527080	115527080 [568-582]	0	2019.13	S9(Phospho): 100	2.53	0.98	1.28	0.99	2.09	1.23	2.94	1.78	1.6	1.76	1.82	1.7	5.01723	High	2.03e-05	6.9e-05	55.16	High	3.2e-05	1	S9(Phospho): 100	S9;	115527080	NP_004680.2	APVINNGsPTILGKR	Yes
ATRX	546	transcriptional regulator ATRX isoform 1 [Homo sapiens]	S1527	EVIEIEDAsPTK	530788276	2×TMT6plex [N-Term; K12]; 1×Phospho [S9(100)]	530788276 1×Phospho [S1527(100)]	0.000295751	0.000147488	1	2	16	530788278; 530788276	530788276 [1519-1530]	0	1868.97	S9(Phospho): 100	1.94	1.73	2.26	1.63	1.62	1.44	1.99	1.84	2.33	1.66	2	1.61	4.92423	High	5.93e-05	0.0001921	46.87	High	8.27e-05	1	S9(Phospho): 100	S9;	530788276	NP_000480.3	VIEIEDAsPTKCPIT	Yes
TOP2A	7153	DNA topoisomerase 2-alpha [Homo sapiens]	S1247	IKNENTEGsPQEDGVELEGLK	19913406	3×TMT6plex [N-Term; K2; K21]; 1×Deamidated [Q11]; 1×Phospho [S9(100)]	19913406 1×Phospho [S1247(100)]	5.07e-05	6.55e-05	1	1	8	19913406	19913406 [1239-1259]	1	3054.55	S9(Phospho): 100	1.59	1.95	2.62	1.78	1.95	1.86	1	1.16	1.17	1.06	1.11	0.97	6.74393	High	2.03e-05	4.14e-05	43.96	High	2.27e-05	1	S9(Phospho): 100	S9;	19913406	NP_001058.2	KNENTEGsPQEDGVE	Yes
RALBP1	10928	ralA-binding protein 1 [Homo sapiens]	S645	AGKEPAKPsPSR	5803145	3×TMT6plex [N-Term; K3; K7]; 1×Phospho [S9(99)]	5803145 1×Phospho [S645(99)]	0.102978	0.00497225	1	1	1	5803145	5803145 [637-648]	1	1992.12	S9(Phospho): 98.98	3.18	2.85	1.47	1.65	0.99	1.04							3.27861	High	0.001092	0.01913					S9(Phospho): 98.98	S9;	5803145	NP_006779.1	GKEPAKPsPSRDRKE	Yes
MIS18BP1	55320	mis18-binding protein 1 [Homo sapiens]	S1008	ILLPSFQDsEDDDDILPNMDKNPTTPSSVIFPLVK	42415492	3×TMT6plex [N-Term; K21; K35]; 3×Deamidated [Q7; N18; N22]; 1×Phospho [S9(100)]	42415492 1×Phospho [S1008(100)]	0.00367198	0.000383028	1	1	14	42415492	42415492 [1000-1034]	1	4671.35	S9(Phospho): 99.79	2.27	1.25	1.63	1.27	1.68	1.37	4.06	2.17	2.81	1.62	2.66	2.13	3.42178	High	0.0001218	0.000661	19.66	High	0.0002407	1	S9(Phospho): 99.79	S9;	42415492	NP_060823.3	LLPSFQDsEDDDDIL	Yes
SPAG9	9043	C-Jun-amino-terminal kinase-interacting protein 4 isoform 1 [Homo sapiens]	T418	EVENLILENtQLLETK	194578923	2×TMT6plex [N-Term; K16]; 1×Phospho [T10(100)]	194578923 1×Phospho [T418(100)]	0.000473865	0.000193352	1	4	2	354681995; 194578923; 194578921; 27436920	194578923 [409-424]	0	2424.3	T10(Phospho): 100	1.8	4.44	3.1	1.39	1.08	1.76							3.80197	High	5.25e-05	0.0001343	27.99	High	0.0001196	1	T10(Phospho): 100	T10;	194578923	NP_001124000.1	ENLILENtQLLETKN	Yes
ARAP3	64411	arf-GAP with Rho-GAP domain, ANK repeat and PH domain-containing protein 3 [Homo sapiens]	T1440	EWTVKPENPLtSQKSLDQPFLSK	21264337	4×TMT6plex [N-Term; K5; K14; K23]; 1×Phospho [T11(95.5)]	21264337 1×Phospho [T1440(95.5)]	0.0147784	0.000870764	1	1	6	21264337	21264337 [1430-1452]	1	3669.01	T11(Phospho): 95.69	0.77	0.85	0.99	3.56	3.65	1.74	0.89	0.99	0.81	2.79	3.39	1.79	3.61127	High	0.0002235	0.002442					T11(Phospho): 95.69	T11;	21264337	NP_071926.4	VKPENPLtSQKSLDQ	No
EPB41L1	2036	band 4.1-like protein 1 isoform a [Homo sapiens]	T477	SEAEEGEVRTPtK	30061489	2×TMT6plex [N-Term; K13]; 1×Phospho [T/S]		0.00541504	0.000453644	1	4	11	385251401; 385251397; 385251399; 30061489	30061489 [466-478]	1	1970.98	T12(Phospho): 99.04	1.19	1.41	1.01	2.7	2.1	0.82	1.14	1.23	0.86	2.14	1.77	0.76	4.45873	High	0.000781	0.01202	21.46	High	0.0004679	1	T12(Phospho): 99.04	T12;	30061489	NP_036288.2	EGEVRTPtKIKELKP	Yes
KMT2A	4297	histone-lysine N-methyltransferase 2A isoform 1 precursor [Homo sapiens]	T337	DKEGtPPLTK	308199413	3×TMT6plex [N-Term; K2; K10]; 1×Phospho [T5(100)]	308199413 1×Phospho [T337(100)]	0.083684	0.00381917	1	2	6	56550039; 308199413	308199413 [333-342]	1	1853.04	T5(Phospho): 100	2.02	0.83	1.71	1.5	1.62	2.04							2.66194	High	0.0008911	0.01521	10.39	High	0.001539	1	T5(Phospho): 100	T5;	308199413	NP_001184033.1	VRKDKEGtPPLTKED	Yes
MKI67	4288	antigen KI-67 isoform 1 [Homo sapiens]	T1355	ELFQtPGHTEEAVAAGK	103472005	2×TMT6plex [N-Term; K17]; 1×Phospho [T5(100)]	103472005 1×Phospho [T1355(100)]	7.68e-05	9e-05	1	2	4	103472005; 225543215	103472005 [1351-1367]	0	2323.17	T5(Phospho): 100	1.29	1.73	2.09	1.16	1.54	1.71	1.21	1.54	1.73	1.42	1.54	1.46	6.04256	High	2.03e-05	3.79e-05	47.17	High	2.27e-05	1	T5(Phospho): 100	T5;	103472005	NP_002408.3	GFKELFQtPGHTEEA	Yes
MKI67	4288	antigen KI-67 isoform 1 [Homo sapiens]	T1233	ELFQtPGHTEELVAAGK	103472005	2×TMT6plex [N-Term; K17]; 1×Phospho [T5(100)]	103472005 1×Phospho [T1233(100)]	0.000120085	9e-05	1	2	4	103472005; 225543215	103472005 [1229-1245]	0	2365.22	T5(Phospho): 100	0.9	1.83	2.1	1.53	1.47	1.41	1.29	1.91	1.79	1.26	1.58	1.37	5.03722	High	2.03e-05	4.87e-05	46.58	High	3.2e-05	1	T5(Phospho): 100	T5;	103472005	NP_002408.3	GFKELFQtPGHTEEL	Yes
MKI67	4288	antigen KI-67 isoform 1 [Homo sapiens]	T328	DVESVQtPSK	103472005	2×TMT6plex [N-Term; K10]; 1×Phospho [T7(100)]	103472005 1×Phospho [T328(100)]	0.00233412	0.000314125	1	1	2	103472005	103472005 [322-331]	0	1627.83	T7(Phospho): 100	1.25	1.74	2.11	0.9	1.26	0.92							3.57632	High	9.7e-05	0.0004555	22.15	High	0.0001505	1	T7(Phospho): 100	T7;	103472005	NP_002408.3	RDVESVQtPSKAVGA	Yes
SRRM2	23524	serine/arginine repetitive matrix protein 2 [Homo sapiens]	T2599	EGRPPEPtPAK	118572613	2×TMT6plex [N-Term; K11]; 1×Phospho [T8(100)]	118572613 1×Phospho [T2599(100)]	0.0883316	0.00410026	1	1	4	118572613	118572613 [2592-2602]	0	1716.91	T8(Phospho): 100	1.41	1.57	2.47	1.28	1.19	1.73	1.54	2.76	4.43	1.88	1.53	2.96	2.70111	High	0.001925	0.0357	5.61	High	0.0009486	1	T8(Phospho): 100	T8;	118572613	NP_057417.3	EGRPPEPtPAKRKRR	Yes
MKI67	4288	antigen KI-67 isoform 1 [Homo sapiens]	T1327	LDLTENLtGSK	103472005	2×TMT6plex [N-Term; K11]; 1×Phospho [T8(100)]	103472005 1×Phospho [T1327(100)]; 1×Phospho [T2888(100)]	0.0113262	0.000778694	1	2	4	103472005; 225543215	103472005 [1320-1330]; [1562-1572]	0	1728.92	T8(Phospho): 100	0.94	1.43	2.66	1.34	1.76	1.44	0.66	0.99	1.48	0.87	0.95	0.95	3.47964	High	0.000202	0.00188	20.19	High	0.0004613	1	T8(Phospho): 100	T8;	103472005	NP_002408.3	LDLTENLtGSKRRPQ	Yes
RIC1	57589	RAB6A-GEF complex partner protein 1 isoform a [Homo sapiens]	T992	AIGSGESEtPPSTPTAQEPSSSGGFEFFR	330864707	1×TMT6plex [N-Term]; 1×Phospho [T9(100)]	330864707 1×Phospho [T992(100)]	6.48e-05	6.55e-05	1	3	4	330864720; 330864713; 330864707	330864707 [984-1012]	0	3266.47	T9(Phospho): 100	1.52	2.19	1.8	1.72	1.35	1.53	1.38	1.43	0.75	1	1.05	0.98	4.51019	High	1.3e-05	2.82e-05	28.4	High	2.27e-05	1	T9(Phospho): 100	T9;	330864707	NP_065880.2	IGSGESEtPPSTPTA	Yes
ZNF318	24149	zinc finger protein 318 [Homo sapiens]	S2035	sPTVLCQK	120587019	2×TMT6plex [N-Term; K8]; 1×Carbamidomethyl [C6]; 1×Phospho [S1(100)]	120587019 1×Phospho [S2035(100)]	0.0856468	0.00394964	1	1	2	120587019	120587019 [2035-2042]	0	1470.78	S1(Phospho): 100	2.02	1.43	1.78	1.74	2.09	1.67							1.81092	High	0.0009087	0.01551	5.4	High	0.005953	1	S1(Phospho): 100	S1;	120587019	NP_055160.2	RVSPAHRsPTVLCQK	Yes
WNK4	65266	serine/threonine-protein kinase WNK4 [Homo sapiens]	S97	sPPPSSK	34365793	2×TMT6plex [N-Term; K7]; 1×Phospho [S1(100)]	34365793 1×Phospho [S97(100)]	0.137068	0.00693628	1	1	2	34365793	34365793 [97-103]	0	1237.66	S1(Phospho): 100	1.72	2.48	1.3	1.56	1.12	4.02							1.87901	High	0.002557	0.05001	16.89	High	0.001542	1	S1(Phospho): 100	S1;	34365793	NP_115763.2	AGPGPARsPPPSSKE	Yes
FAM64A	54478	protein FAM64A isoform 2 [Homo sapiens]	S16	sLQHQEQLEDSK	305632783	2×TMT6plex [N-Term; K12]; 1×Deamidated [Q3]; 1×Phospho [S1(100)]	305632783 1×Phospho [S16(100)]	0.000667964	0.000193352	1	2	2	305632781; 305632783	305632783 [16-27]	0	1980.97	S1(Phospho): 100	1.69	2.44	2.77	1.1	1.28	1.43							4.6716	High	5.25e-05	0.0001739	24.99	High	0.0001709	1	S1(Phospho): 100	S1;	305632783	NP_001182157.1	GTSVRRRsLQHQEQL	Yes
CD44	960	CD44 antigen isoform 1 precursor [Homo sapiens]	S706	sQEMVHLVNK	48255935	2×TMT6plex [N-Term; K10]; 1×Phospho [S1(100)]	48255935 1×Phospho [S706(100)]	0.000333791	0.000147488	1	6	28	48255941; 321400138; 321400140; 48255935; 48255939; 48255937	48255935 [706-715]	0	1722.9	S1(Phospho): 100	1.35	1.31	2.12	0.84	1.16	2.02	1.02	0.65	1.3	0.82	0.89	1.74	4.7563	High	6.84e-05	0.0002654	37.93	High	0.0001475	1	S1(Phospho): 100	S1;	48255935	NP_000601.3	LNGEASKsQEMVHLV	Yes
SLAIN2	57606	SLAIN motif-containing protein 2 [Homo sapiens]	S413	sLPNLSR	149588928	1×TMT6plex [N-Term]; 1×Phospho [S1(100)]	149588928 1×Phospho [S413(100)]	0.149749	0.00763942	1	1	4	149588928	149588928 [413-419]	0	1095.58	S1(Phospho): 100	1.03	1.59	1.45	1.32	2.67	2.08							2.45616	High	0.002993	0.05843	10.2	High	0.009377	1	S1(Phospho): 100	S1;	149588928	NP_065897.1	NEEKLRRsLPNLSRT	Yes
RASSF8	11228	ras association domain-containing protein 8 isoform a [Homo sapiens]	S129	sLTFTGGAK	258613931	2×TMT6plex [N-Term; K9]; 1×Phospho [S1(100)]	258613931 1×Phospho [S129(100)]	0.0118205	0.000778694	1	2	2	258613931; 23503243	258613931 [129-137]	0	1419.76	S1(Phospho): 100	0.81	1.61	2.07	1.73	1.07	2.5							2.95402	High	0.000202	0.001958	24.02	High	0.0003519	1	S1(Phospho): 100	S1;	258613931	NP_001158219.1	RREPKRKsLTFTGGA	Yes
KRT8	3856	keratin, type II cytoskeletal 8 isoform 1 [Homo sapiens]	S281	sLDMDSIIAEVK	372466572	2×TMT6plex [N-Term; K12]; 1×Phospho [S1(100)]	372466572 1×Phospho [S281(100)]	0.00029178	0.000147488	1	2	16	372466572; 372466577	372466572 [281-292]	0	1858.96	S1(Phospho): 100	0.7	1.69	1.49	2.49	1.79	1.08	0.66	1.39	1.33	2.98	1.84	1.25	4.04336	High	2.03e-05	9.8e-05	60.24	High	8.36e-05	1	S1(Phospho): 100	S1;	372466572	NP_001243211.1	LSMDNSRsLDMDSII	No
SRSF2	6427	serine/arginine-rich splicing factor 2 [Homo sapiens]	S189; S191	sRsPPPVSK	47271443	2×TMT6plex [N-Term; K9]; 2×Phospho [S1(100); S3(100)]	47271443 2×Phospho [S189(100); S191(100)]	0.00761486	0.000546498	1	1	11	47271443	47271443 [189-197]	1	1572.8	S1(Phospho): 100; S3(Phospho): 100	1.35	1.05	1.64	1.62	1.8	2.1	1.26	1.32	1.21	2.19	1.9	2.4	4.16061	High	0.0003352	0.004018	20.52	High	0.001114	1	S1(Phospho): 100; S3(Phospho): 100	S1; S3;	47271443	NP_003007.2	RSRSRSRsRSPPPVS;RSRSRSRsPPPVSKR	Yes;Yes
CEP170	9859	centrosomal protein of 170 kDa isoform alpha [Homo sapiens]	S356; S359	sIKsDVPVYLK	109255228	3×TMT6plex [N-Term; K3; K11]; 2×Phospho [S1(100); S4(100)]	109255228 2×Phospho [S356(100); S359(100)]	0.0488836	0.00231373	1	3	1	109255228; 109255230; 109255232	109255228 [356-366]	1	2096.14	S1(Phospho): 100; S4(Phospho): 100	0.51	1.22	2.47	0.87	0.92	3.35							2.59036	High	0.0005952	0.008362					S1(Phospho): 100; S4(Phospho): 100	S1; S4;	109255228	NP_055627.2	RTEEDSKsIKSDVPV;EDSKSIKsDVPVYLK	Yes;Yes
ERRFI1	54206	ERBB receptor feedback inhibitor 1 [Homo sapiens]	S337	sLPSYLNGVMPPTQSFAPDPK	10047086	2×TMT6plex [N-Term; K21]; 1×Deamidated [N7]; 1×Phospho [S1(96.8)]	10047086 1×Phospho [S337(96.8)]	0.000281224	0.000147488	1	1	9	10047086	10047086 [337-357]	0	2785.39	S1(Phospho): 96.82	2.04	1.91	1.84	1.6	1.33	2.52	1.29	0.98	1.46	1.31	1.34	1.75	5.12377	High	2.03e-05	8.76e-05	17.36	High	0.0002374	1	S1(Phospho): 96.82	S1;	10047086	NP_061821.1	SRTPSPKsLPSYLNG	No
CDCA7L	55536	cell division cycle-associated 7-like protein isoform 1 [Homo sapiens]	S21	EVADIFNAPsDDEEFVGFR	31542537	1×TMT6plex [N-Term]; 1×Phospho [S10(100)]	31542537 1×Phospho [S21(100)]	8.22e-05	9e-05	1	2	20	31542537; 188497637	31542537 [12-30]	0	2466.11	S10(Phospho): 100	2.11	2	1.47	1.07	0.8	1.34	2.02	1.64	1.32	1.23	0.76	1.6	4.81888	High	2.03e-05	4.19e-05	47.14	High	5.72e-05	1	S10(Phospho): 100	S10;	31542537	NP_061189.2	ADIFNAPsDDEEFVG	Yes
DDX21	9188	nucleolar RNA helicase 2 isoform 1 [Homo sapiens]	S71	AEPSEVDMNsPK	50659095	2×TMT6plex [N-Term; K12]; 1×Phospho [S10(100)]	50659095 1×Phospho [S71(100)]	0.000805344	0.000193352	1	1	8	50659095	50659095 [62-73]	0	1841.88	S10(Phospho): 100	2.03	1.5	1.41	1.48	1.76	1.7	1.95	1.75	1.37	1.33	1.66	1.38	4.07555	High	6.84e-05	0.0002871	35.21	High	8.27e-05	1	S10(Phospho): 100	S10;	50659095	NP_004719.2	PSEVDMNsPKSKKAK	Yes
LIG1	3978	DNA ligase 1 isoform 1 [Homo sapiens]	S141	TIQEVLEEQsEDEDREAK	4557719	2×TMT6plex [N-Term; K18]; 1×Phospho [S10(100)]	4557719 1×Phospho [S141(100)]	0.000200609	0.00012481	1	2	9	574274721; 4557719	4557719 [132-149]	1	2686.29	S10(Phospho): 100	2.01	1.17	2.17	1.46	1.52	1.62	1.12	0.67	1.5	0.75	1.24	1.54	4.80816	High	2.03e-05	6.81e-05	29.59	High	6.51e-05	1	S10(Phospho): 100	S10;	4557719	NP_000225.1	QEVLEEQsEDEDREA	Yes
NIPBL	25836	nipped-B-like protein isoform A [Homo sapiens]	S2658	AITSLLGGGsPK	47578105	2×TMT6plex [N-Term; K12]; 1×Phospho [S10(100)]	47578105 1×Phospho [S2658(100)]	0.000173486	0.00012481	1	2	26	47578107; 47578105	47578105 [2649-2660]	0	1638.92	S10(Phospho): 100	1.25	0.97	1.44	1.35	2.04	1.21	1.05	0.93	1.27	1.18	1.66	1.1	4.84462	High	5.93e-05	0.0002241	47.26	High	0.0001264	1	S10(Phospho): 100	S10;	47578105	NP_597677.2	TSLLGGGsPKNNTAA	Yes
MAP7D1	55700	MAP7 domain-containing protein 1 isoform 1 [Homo sapiens]	S460	LSASTASELsPK	78042577	2×TMT6plex [N-Term; K12]; 1×Phospho [S10(100)]	78042577 1×Phospho [S460(100)]	0.000146379	9e-05	1	3	16	556503401; 556503440; 78042577	78042577 [451-462]	0	1728.92	S10(Phospho): 100	1.16	1.58	1.61	1.18	2.02	2.19	1.27	1.58	1.85	1.23	2.18	2.32	5.39997	High	2.03e-05	5.2e-05	44.22	High	3.2e-05	1	S10(Phospho): 100	S10;	78042577	NP_060537.3	ASTASELsPKSKARP	Yes
AHCTF1	25909	protein ELYS [Homo sapiens]	S1405	DLLVAAEAFsELNHLSPVQGTEASLCAPSVYEGK	262359929	2×TMT6plex [N-Term; K34]; 1×Carbamidomethyl [C26]; 1×Phospho [S10(98.2)]	262359929 1×Phospho [S1405(98.2)]	8.03e-05	9e-05	1	1	8	262359929	262359929 [1396-1429]	0	4141.06	S10(Phospho): 98.18	1.53	0.93	1.39	0.83	2.06	1.41							4.53565	High	2.03e-05	3.29e-05	18.56	High	3.2e-05	1	S10(Phospho): 98.18	S10;	262359929	NP_056261.4	LVAAEAFsELNHLSP	No
C1orf226	400793	uncharacterized protein C1orf226 isoform 1 [Homo sapiens]	S241	VLPNGEVSLsVPDLIHK	207028635	2×TMT6plex [N-Term; K17]; 1×Deamidated [N4]; 1×Phospho [S10(99.1)]	207028635 1×Phospho [S241(99.1)]	0.000114292	9e-05	1	2	3	207028635; 145977194	207028635 [232-248]	0	2356.29	S10(Phospho): 99.1	0.64	1.63	1.27	2.07	5.36	1.37							4.04113	High	2.03e-05	5e-05	39.47	High	2.27e-05	1	S10(Phospho): 99.1	S10;	207028635	NP_001128712.1	PNGEVSLsVPDLIHK	No
NCAPG	64151	condensin complex subunit 3 [Homo sapiens]	S674	TLHCEGTEINsDDEQESK	21359945	2×TMT6plex [N-Term; K18]; 1×Carbamidomethyl [C4]; 1×Phospho [S11(100)]	21359945 1×Phospho [S674(100)]	4.27e-05	6.55e-05	1	1	38	21359945	21359945 [664-681]	0	2630.17	S11(Phospho): 100	2.41	1.62	2.55	1.13	1.97	1.81	3.26	1.93	3.62	1.21	2.29	1.9	9.1674	High	0	1.08e-05	93.25	High	1.91e-05	1	S11(Phospho): 100	S11;	21359945	NP_071741.2	CEGTEINsDDEQESK	Yes
TPI1	7167	triosephosphate isomerase isoform 2 [Homo sapiens]	S117	VTNGAFTGEIsPGMIK	226529917	2×TMT6plex [N-Term; K16]; 1×Deamidated [N3]; 1×Phospho [S11(100)]	226529917 1×Phospho [S117(100)]	6.38e-05	6.55e-05	1	2	8	4507645; 226529917	226529917 [107-122]	0	2161.1	S11(Phospho): 100	1.48	1.9	1.34	2.15	1.22	2.29	1.17	1.36	1.64	1.55	1.28	1.74	5.2994	High	2.03e-05	4.45e-05	61.73	High	1.91e-05	1	S11(Phospho): 100	S11;	226529917	NP_001152759.1	GAFTGEIsPGMIKDC	Yes
FLNA	2316	filamin-A isoform 2 [Homo sapiens]	S1084	AFGPGLQGGSAGsPAR	160420317	1×TMT6plex [N-Term]; 1×Phospho [S13(100)]	160420317 1×Phospho [S1084(100)]	5.2e-05	6.55e-05	1	2	14	160420317; 116063573	160420317 [1072-1087]	0	1738.85	S13(Phospho): 100	1.55	2.09	1.45	1.33	1.4	1.22	1.75	1.68	1.31	1.05	1.45	1.26	5.47019	High	1.3e-05	2.86e-05	74.59	High	1.91e-05	1	S13(Phospho): 100	S13;	160420317	NP_001104026.1	LQGGSAGsPARFTID	Yes
EPS15L1	58513	epidermal growth factor receptor substrate 15-like 1 isoform 1 [Homo sapiens]	S229	TVFPGAVPVLPAsPPPK	385428859	2×TMT6plex [N-Term; K17]; 1×Phospho [S13(100)]	385428859 1×Phospho [S229(100)]	6.99e-05	9e-05	1	4	8	10864047; 385428859; 385648257; 385648259	385428859 [217-233]	0	2212.25	S13(Phospho): 100	1.17	2.18	1.24	2.14	0.91	1.42	1.14	2.45	1.07	3.26	1.28	2.07	5.56637	High	2.03e-05	3.98e-05	35.97	High	7.92e-05	1	S13(Phospho): 100	S13;	385428859	NP_001245303.1	AVPVLPAsPPPKDSL	Yes
RB1CC1	9821	RB1-inducible coiled-coil protein 1 isoform 1 [Homo sapiens]	S653	ASVSQTSPQSASsPR	134304842	1×TMT6plex [N-Term]; 1×Phospho [S13(98.2)]	134304842 1×Phospho [S653(98.2)]	0.000513161	0.000193352	1	2	23	134304846; 134304842	134304842 [641-655]	0	1798.85	S13(Phospho): 98.19	2.3	2.22	1.1	0.69	1.25	0.98	3.3	2.71	1.47	0.81	1.86	1.55	4.23467	High	5.25e-05	0.0001428	23.04	High	0.0001545	1	S13(Phospho): 98.19	S13;	134304842	NP_055596.3	TSPQSASsPRMESTA	Yes
EHD4	30844	EH domain-containing protein 4 [Homo sapiens]	S459	DKPVYDELFYTLsPINGK	21264315	3×TMT6plex [N-Term; K2; K18]; 1×Deamidated [N16]; 1×Phospho [S13(100)]	21264315 1×Phospho [S459(100)]	8.45e-05	9e-05	1	1	8	21264315	21264315 [447-464]	0	2867.51	S13(Phospho): 99.99	1.56	2.48	1.57	1.98	1.67	3.09	1.06	1.29	1.2	1.26	1.12	1.55	5.54479	High	2.03e-05	3.63e-05	29.91	High	7.72e-05	1	S13(Phospho): 99.99	S13;	21264315	NP_644670.1	DELFYTLsPINGKIS	Yes
EHD1	10938	EH domain-containing protein 1 isoform 2 [Homo sapiens]	S470	DKPTYDEIFYTLsPVNGK	540344518	3×TMT6plex [N-Term; K2; K18]; 1×Deamidated [N16]; 1×Phospho [S13(100)]	540344518 1×Phospho [S470(100)]	8.1e-05	9e-05	1	2	12	540344518; 540344515	540344518 [458-475]	0	2855.47	S13(Phospho): 99.99	1.45	1.37	2.71	1.07	1.06	2.63	1.83	2.13	3.09	1.57	1.59	3.03	6.16767	High	2.03e-05	3.31e-05	53.34	High	2.27e-05	1	S13(Phospho): 99.99	S13;	540344518	NP_001269374.1	DEIFYTLsPVNGKIT	No
MYBBP1A	10514	myb-binding protein 1A isoform 1 [Homo sapiens]	S1267	KNQKPSQVNGAPGsPTEPAGQK	157694494	4×TMT6plex [N-Term; K4; K22; K]; 3×Deamidated [Q/N]; 1×Phospho [S14(100)]	157694494 1×Phospho [S1267(100)]	0.00144113	0.000236062	1	2	7	157694492; 157694494	157694494 [1254-1275]	1	3219.71	S14(Phospho): 98.24	1.65	0.8	1.94	1.08	2.14	2.03	1.21	1.19	1.35	0.91	1.24	1.3	5.04666	High	7.18e-05	0.0003114	11.29	High	0.001631	1	S14(Phospho): 98.24	S14;	157694494	NP_001099008.1	QVNGAPGsPTEPAGQ	Yes
PVRL3	25945	nectin-3 isoform 1 precursor [Homo sapiens]	S465	ESQIDVLQQDELDsYPDSVK	11386199	2×TMT6plex [N-Term; K20]; 1×Phospho [S14(98.8)]	11386199 1×Phospho [S465(98.8)]	5.3e-05	6.55e-05	1	1	12	11386199	11386199 [452-471]	0	2846.37	S14(Phospho): 98.85	0.93	3.93	3.07	1.23	1.21	1.75	1.86	2.3	1.76	1.41	1.11	1.64	4.99111	High	2.03e-05	3.06e-05	59.87	High	1.91e-05	1	S14(Phospho): 98.85	S14;	11386199	NP_056295.1	LQQDELDsYPDSVKK	Yes
RRM2	6241	ribonucleoside-diphosphate reductase subunit M2 isoform 1 [Homo sapiens]	S80	VPLAPITDPQQLQLsPLK	260064013	2×TMT6plex [N-Term; K18]; 1×Phospho [S15(100)]	260064013 1×Phospho [S80(100)]	5.71e-05	6.55e-05	1	2	30	260064013; 4557845	260064013 [66-83]	0	2496.42	S15(Phospho): 100	2.62	2.23	1.34	1.19	1.63	1.65	3.07	2.84	1.52	1.27	1.62	1.8	6.39792	High	1.3e-05	2.55e-05	64.65	High	3.2e-05	1	S15(Phospho): 100	S15;	260064013	NP_001159403.1	DPQQLQLsPLKGLSL	No
ZCRB1	85437	zinc finger CCHC-type and RNA-binding motif-containing protein 1 [Homo sapiens]	S155	KAPEPEEEIEEVEEsEDEGEDPALDSLSQAIAFQQAK	51243065	3×TMT6plex [N-Term; K37; K]; 1×Phospho [S15(100)]	51243065 1×Phospho [S155(100)]	5.65e-05	6.55e-05	1	1	14	51243065	51243065 [141-177]	1	4854.32	S15(Phospho): 100	1.82	1.73	1.8	2.1	1.39	1.63	1.19	0.91	1.11	0.94	0.97	1.3	5.85936	High	2.03e-05	4.94e-05	49.35	High	2.27e-05	1	S15(Phospho): 100	S15;	51243065	NP_149105.3	EIEEVEEsEDEGEDP	Yes
UMPS	7372	uridine 5'-monophosphate synthase [Homo sapiens]	S214	FIQENVFVAANHNGsPLSIK	4507835	2×TMT6plex [N-Term; K20]; 1×Deamidated [N]; 1×Phospho [S15(100)]	4507835 1×Phospho [S214(100)]	4.37e-05	6.55e-05	1	1	14	4507835	4507835 [200-219]	0	2724.42	S15(Phospho): 100	1.54	1.43	1.16	1.07	2.68	0.82	2.38	2.07	1.67	1.45	2.46	1.52	6.54873	High	1.3e-05	1.84e-05	58.98	High	1.91e-05	1	S15(Phospho): 100	S15;	4507835	NP_000364.1	VAANHNGsPLSIKEA	Yes
LPAR1	1902	lysophosphatidic acid receptor 1 [Homo sapiens]	S358	SASSLNHTILAGVHsNDHSVV	16950636	1×TMT6plex [N-Term]; 1×Phospho [S15(100)]	16950636 1×Phospho [S358(100)]	0.000866952	0.000193352	1	1	4	16950636	16950636 [344-364]	0	2454.2	S15(Phospho): 100	1.18	1.2	0.66	2.44	0.77	2.07	0.99	0.88	0.64	1.24	0.69	1.18	3.97556	High	5.93e-05	0.0002112	4.66	High	0.0001746	1	S15(Phospho): 100	S15;	16950636	NP_001392.2	TILAGVHsNDHSVV_	No
KRT13	3860	keratin, type I cytoskeletal 13 isoform a [Homo sapiens]	S20	LQSSSASYGGGFGGGsCQLGGGR	131412225	1×TMT6plex [N-Term]; 1×Carbamidomethyl [C17]; 1×Phospho [S16(100)]	131412225 1×Phospho [S20(100)]	4.42e-05	6.55e-05	1	2	11	131412225; 131412228	131412225 [5-27]	0	2456.09	S16(Phospho): 100	1.16	2.12	1.58	1.31	3.66	1.98	0.55	0.9	0.6	0.76	1.3	0.75	5.12843	High	1.3e-05	2.16e-05	74.24	High	1.91e-05	1	S16(Phospho): 100	S16;	131412225	NP_705694.2	GGGFGGGsCQLGGGR	No
ACOX1	51	peroxisomal acyl-coenzyme A oxidase 1 isoform a [Homo sapiens]	S26	DSASFNPELLTHILDGsPEK	30089972	2×TMT6plex [N-Term; K20]; 1×Phospho [S17(100)]	30089972 1×Phospho [S26(100)]	4.27e-05	6.55e-05	1	2	6	30089974; 30089972	30089972 [10-29]	0	2708.36	S17(Phospho): 100	1.35	1.66	1.2	2.37	2.57	1.17	1.79	3.28	1.54	3.38	3.91	1.94	6.87432	High	0	1.5e-05	36.8	High	2.27e-05	1	S17(Phospho): 100	S17;	30089972	NP_004026.2	LTHILDGsPEKTRRR	Yes
AKAP12	9590	A-kinase anchor protein 12 isoform 1 [Homo sapiens]	S75	NGQLSTINGVAEQDELsLQEGDLNGQK	21493022	2×TMT6plex [N-Term; K27]; 3×Deamidated [Q/N]; 1×Phospho [S17(100)]	21493022 1×Phospho [S75(100)]	5.01e-05	6.55e-05	1	1	55	21493022	21493022 [59-85]	0	3398.63	S17(Phospho): 100	1.15	1.92	2.66	2.01	1.05	1.68	1.09	1.63	1.79	1.87	0.96	1.4	4.9311	High	1.3e-05	2.26e-05	41.33	High	6.51e-05	1	S17(Phospho): 100	S17;	21493022	NP_005091.2	VAEQDELsLQEGDLN	Yes
FLNA	2316	filamin-A isoform 2 [Homo sapiens]	S1533	EGPYSISVLYGDEEVPRsPFK	160420317	2×TMT6plex [N-Term; K21]; 1×Phospho [S18(100)]	160420317 1×Phospho [S1533(100)]	0.000104	9e-05	1	2	6	160420317; 116063573	160420317 [1516-1536]	1	2907.46	S18(Phospho): 100	0.96	2	2.08	1.39	1.39	1.85	1.17	1.77	1.93	1.18	1.37	1.6	5.78745	High	2.03e-05	3.89e-05	17.44	High	0.0001709	1	S18(Phospho): 100	S18;	160420317	NP_001104026.1	GDEEVPRsPFKVKVL	Yes
PUM2	23369	pumilio homolog 2 isoform 1 [Homo sapiens]	S102	SESGGLGVSMVEYVLSSsPADK	13491168	2×TMT6plex [N-Term; K22]; 1×Phospho [S18(100)]	13491168 1×Phospho [S102(100)]	4.65e-05	6.55e-05	1	4	7	544583552; 544583547; 13491168; 544583550	13491168 [85-106]	0	2737.34	S18(Phospho): 99.98	2.21		1.27	1.58	1.17	2.04	1.26	0.86	1.16	1.09	1.19	1.2	5.19722	High	1.3e-05	2.07e-05	24.59	High	2.27e-05	1	S18(Phospho): 99.98	S18;	13491168	NP_056132.1	VEYVLSSsPADKLDS	No
ELOVL5	60481	elongation of very long chain fatty acids protein 5 isoform 2 [Homo sapiens]	S312	DHQNGSMAAVNGHTNSFsPLENNVKPR	338827646	2×TMT6plex [N-Term; K25]; 2×Deamidated [N4; N11]; 1×Phospho [S18(100)]	338827646 1×Phospho [S312(100)]	4.98e-05	6.55e-05	1	2	5	11464975; 338827646	338827646 [295-321]	0	3461.63	S18(Phospho): 99.98	2.05	1.62	1.7	1.05	1.53	1.81							6.69583	High	1.3e-05	2.24e-05	27.61	High	2.27e-05	1	S18(Phospho): 99.98	S18;	338827646	NP_001229757.1	NGHTNSFsPLENNVK	No
SERBP1	26135	plasminogen activator inhibitor 1 RNA-binding protein isoform 1 [Homo sapiens]	S234	GGSGSHNWGTVKDELTEsPK	66346679	3×TMT6plex [N-Term; K12; K20]; 1×Phospho [S18(98.8)]	66346679 1×Phospho [S234(98.8)]	8.38e-05	9e-05	1	2	19	66346679; 66346681	66346679 [217-236]	1	2853.44	S18(Phospho): 99.98	1.33	1.48	1.3	1.24	2.04	1.83	1.59	2.1	1.7	1.28	2.23	1.97	7.02639	High	2.03e-05	3.38e-05	23.59	High	8.27e-05	1	S18(Phospho): 99.98	S18;	66346679	NP_001018077.1	VKDELTEsPKYIQKQ	Yes
ERRFI1	54206	ERBB receptor feedback inhibitor 1 [Homo sapiens]	S273	AsPNSDEDKPEVPPR	10047086	2×TMT6plex [N-Term; K9]; 1×Phospho [S2(100)]	10047086 1×Phospho [S273(100)]	0.00692487	0.000523051	1	1	2	10047086	10047086 [272-286]	0	2176.07	S2(Phospho): 100	2.63	2.25	1.87	1.05	0.89	1.54	1.55	0.93	1.32	0.91	0.85	1.2	3.11646	High	0.0001488	0.001163					S2(Phospho): 100	S2;	10047086	NP_061821.1	NCCIHRAsPNSDEDK	Yes
STMN1	3925	stathmin isoform a [Homo sapiens]	S16	AsGQAFELILSPR	5031851	1×TMT6plex [N-Term]; 1×Phospho [S11(100)]	5031851 1×Phospho [S25(100)]	5.26e-05	6.55e-05	1	2	57	224451142; 5031851	5031851 [15-27]	0	1697.88	S2(Phospho): 100	2.17	1.42	2.07	0.8	0.58	1.54	1.78	1.05	1.66	0.79	0.67	1.34	5.56032	High	1.3e-05	2.37e-05	63.37	High	5.23e-05	1	S2(Phospho): 100	S2;	5031851	NP_005554.1	KELEKRAsGQAFELI	Yes
ARAF	369	serine/threonine-protein kinase A-Raf isoform 2 [Homo sapiens]	S260	GsPSPASVSSGR	371875793	1×TMT6plex [N-Term]; 1×Phospho [S2(100)]	371875793 1×Phospho [S260(100)]	0.0101154	0.000765738	1	2	17	4502193; 371875793	371875793 [259-270]	0	1397.66	S2(Phospho): 100	1.31	1.75	2.08	1.19	1.37	1.35	1.23	1.48	1.33	0.97	1.27	1.2	3.14804	High	0.0003576	0.004339	33.75	High	0.0003273	1	S2(Phospho): 100	S2;	371875793	NP_001243125.1	SDGTPRGsPSPASVS	No
NCOR2	9612	nuclear receptor corepressor 2 isoform 1 [Homo sapiens]	S2203	RsPEPNK	331284178	2×TMT6plex [N-Term; K7]; 1×Phospho [S2(100)]	331284178 1×Phospho [S2203(100)]	0.121642	0.0061297	1	3	3	331284176; 331284180; 331284178	331284178 [2202-2208]	1	1365.73	S2(Phospho): 100	1.24	1.45	1.4	2.04	1.82	1.81							3.74313	High	0.002073	0.03976	8.54	High	0.004082	1	S2(Phospho): 100	S2;	331284178	NP_006303.4	HSEGGKRsPEPNKTS	No
ARFGAP1	55738	ADP-ribosylation factor GTPase-activating protein 1 isoform a [Homo sapiens]	S150	VsGQPQSVTASSDK	8922652	2×TMT6plex [N-Term; K14]; 1×Phospho [S2(100)]	8922652 1×Phospho [S150(100)]	0.000875062	0.000214298	1	5	4	8922652; 28416436; 527498254; 527498258; 527498256	8922652 [149-162]	0	1928.97	S2(Phospho): 100	1.21	1.75	3.94	0.99	1.24	2.4							3.40527	High	5.93e-05	0.0002132	24.51	High	0.0001264	1	S2(Phospho): 100	S2;	8922652	NP_060679.1	PSMVHRVsGQPQSVT	Yes
DPYSL3	1809	dihydropyrimidinase-related protein 3 isoform 1 [Homo sapiens]	S516	IsVGSDSDLVIWDPDAVK	308818200	2×TMT6plex [N-Term; K18]; 1×Phospho [S2(98.9)]	308818200 1×Phospho [S516(98.9)]	0.000921398	0.000214298	1	2	3	308818200; 4503379	308818200 [515-532]	0	2454.26	S2(Phospho): 98.9	1.43	1.74	1.76	2.36	1.44	2.69							3.44206	High	5.93e-05	0.0002216	33.49	High	8.36e-05	1	S2(Phospho): 98.9	S2;	308818200	NP_001184223.1	YPRKGRIsVGSDSDL	No
ABL1	25	tyrosine-protein kinase ABL1 isoform b [Homo sapiens]	S678	DISNGALAFTPLDTADPAKsPKPSNGAGVPNGALR	62362412	3×TMT6plex [N-Term; K19; K22]; 3×Deamidated [N4; N25; N31]; 1×Phospho [S20(100)]	62362412 1×Phospho [S678(100)]	4.96e-05	6.55e-05	1	2	2	62362412; 62362414	62362412 [659-693]	1	4190.16	S20(Phospho): 100	2.19	1.13	1.42	1.16	1.37	1.5							5.53655	High	1.3e-05	2.23e-05	14.82	High	2.27e-05	1	S20(Phospho): 100	S20;	62362412	NP_009297.2	DTADPAKsPKPSNGA	No
NUP50	10762	nuclear pore complex protein Nup50 isoform b [Homo sapiens]	S296	VDSSVLGSLSSVPLTGFSFsPGNSSLFGK	24497451	2×TMT6plex [N-Term; K29]; 1×Phospho [S20(94.5)]	24497451 1×Phospho [S296(94.5)]	9.41e-05	9e-05	1	2	14	24497451; 24497447	24497451 [277-305]	0	3411.75	S20(Phospho): 94.52	1.53	1.09	1.31	1.4	1.7	2.23							4.73098	High	2.03e-05	3.77e-05	30.29	High	6.51e-05	1	S20(Phospho): 94.52	S20;	24497451	NP_009103.2	PLTGFSFsPGNSSLF	Yes
DAB2	1601	disabled homolog 2 isoform 1 [Homo sapiens]	S227	SGVDQMDLFGDMSTPPDLNsPTESK	148491082	2×TMT6plex [N-Term; K25]; 1×Phospho [S20(98.3)]	148491082 1×Phospho [S227(98.3)]	8.37e-05	9e-05	1	1	2	148491082	148491082 [208-232]	0	3206.47	S20(Phospho): 98.32	0.63	2.14	1.21	1	0.91	1.34							4.88265	High	2.03e-05	3.37e-05	24.42	High	6.51e-05	1	S20(Phospho): 98.32	S20;	148491082	NP_001334.2	STPPDLNsPTESKDI	Yes
APC	324	adenomatous polyposis coli protein isoform b [Homo sapiens]	S780	ALEAELDAQHLSETFDNIDNLsPK	189011566	2×TMT6plex [N-Term; K24]; 1×Phospho [S22(100)]	189011566 1×Phospho [S780(100)]	4.68e-05	6.55e-05	1	2	6	306922386; 189011566	189011566 [759-782]	0	3208.58	S22(Phospho): 100	2.06	1.26	1.22	1.48	1.7	1.49	1.56	1.31	1.19	1.56	1.26	1.31	5.89442	High	1.3e-05	2.09e-05	34.62	High	2.27e-05	1	S22(Phospho): 100	S22;	189011566	NP_001120982.1	FDNIDNLsPKASHRS	Yes
RB1	5925	retinoblastoma-associated protein [Homo sapiens]	S37	TAATAAAAAAEPPAPPPPPPPEEDPEQDsGPEDLPLVR	108773787	1×TMT6plex [N-Term]; 1×Deamidated [Q27]; 1×Phospho [S29(100)]	108773787 1×Phospho [S37(100)]	6.31e-05	6.55e-05	1	1	2	108773787	108773787 [9-46]	0	4078.94	S29(Phospho): 100	0.97	1.44	1.43	2.36	1.37	2.74							6.49278	High	1.3e-05	2.76e-05	38.15	High	2.27e-05	1	S29(Phospho): 100	S29;	108773787	NP_000312.2	EEDPEQDsGPEDLPL	Yes
SYNPO	11346	synaptopodin isoform A [Homo sapiens]	S589	AAsPAKPSSLDLVPNLPK	40353727	3×TMT6plex [N-Term; K6; K18]; 1×Deamidated [N15]; 1×Phospho [S3(100)]	40353727 1×Phospho [S589(100)]	0.000697796	0.000193352	1	3	2	158303333; 40353727; 261278299	40353727 [587-604]	0	2573.46	S3(Phospho): 100	2.21	2.07	0.89	0.77	0.71	0.98							4.23195	High	5.93e-05	0.0001796	12.17	High	0.0001662	1	S3(Phospho): 100	S3;	40353727	NP_009217.3	KVSPRAAsPAKPSSL	No
CHAMP1	283489	chromosome alignment-maintaining phosphoprotein 1 [Homo sapiens]	S476	GGsPDLWK	41281612	2×TMT6plex [N-Term; K8]; 1×Phospho [S3(100)]	41281612 1×Phospho [S476(100)]	0.185989	0.00985574	1	1	7	41281612	41281612 [474-481]	0	1397.72	S3(Phospho): 100	2.18	1.6	1.55	1.01	1.25	1.68	2.49	1.54	1.57	1.35	1.48	2.14	2.97589	High	0.00504	0.1045	15	High	0.004361	1	S3(Phospho): 100	S3;	41281612	NP_115812.1	QKSSRGGsPDLWKSS	Yes
USP36	57602	ubiquitin carboxyl-terminal hydrolase 36 [Homo sapiens]	S742	AVsPAPQSSSR	122114651	1×TMT6plex [N-Term]; 1×Deamidated [Q7]; 1×Phospho [S3(100)]	122114651 1×Phospho [S742(100)]	0.0355571	0.00185874	1	1	6	122114651	122114651 [740-750]	0	1396.67	S3(Phospho): 100	2.15	1.95	1.31	1.18	1.53	1.26	1.4	1.81	1.24	1.18	1.15	1.42	2.77255	High	0.0004632	0.005984	17.59	High	0.0008183	1	S3(Phospho): 100	S3;	122114651	NP_079366.3	VHRARAVsPAPQSSS	Yes
EIF2AK2	5610	interferon-induced, double-stranded RNA-activated protein kinase isoform a [Homo sapiens]	S83	AVsPLLLTTTNSSEGLSMGNYIGLINR	208431827	1×TMT6plex [N-Term]; 1×Phospho [S3(100)]	208431827 1×Phospho [S83(100)]	4.44e-05	6.55e-05	1	2	16	208431829; 208431827	208431827 [81-107]	0	3130.61	S3(Phospho): 100	1.83	2.6	1.55	1.44	1.78	2.11	2.14	1.87	1.41	1.76	1.34	2.78	5.55048	High	1.3e-05	1.91e-05	59.25	High	1.91e-05	1	S3(Phospho): 100	S3;	208431827	NP_001129123.1	NKEKKAVsPLLLTTT	Yes
LRWD1	222229	leucine-rich repeat and WD repeat-containing protein 1 [Homo sapiens]	S212	ANsPEKPPEAGAAHKPR	23097240	3×TMT6plex [N-Term; K6; K15]; 1×Deamidated [N2]; 1×Phospho [S3(100)]	23097240 1×Phospho [S212(100)]	0.00674076	0.000523051	1	1	1	23097240	23097240 [210-226]	0	2525.35	S3(Phospho): 100	1.6	1.63	2.15	1.16	2.17	1.34							3.33478	High	0.0001488	0.001136					S3(Phospho): 100	S3;	23097240	NP_690852.1	TQVQKANsPEKPPEA	Yes
EXOC2	55770	exocyst complex component 2 [Homo sapiens]	S432	GSsFQSGR	21361625	1×TMT6plex [N-Term]; 1×Phospho [S3(99.5)]	21361625 1×Phospho [S432(99.5)]	0.0617886	0.00283321	1	1	9	21361625	21361625 [430-437]	0	1134.51	S3(Phospho): 100	1.34	2.61	2.05	1.81	1.31	1.49	1.19	2.11	1.51	1.22	1.13	1.04	2.58117	High	0.001414	0.0257	18.5	High	0.0006926	1	S3(Phospho): 100	S3;	21361625	NP_060773.3	ASLKRGSsFQSGRDD	Yes
NCOR2	9612	nuclear receptor corepressor 2 isoform 1 [Homo sapiens]	S2413	AKsPAPGLASGDRPPSVSSVHSEGDCNR	331284178	2×TMT6plex [N-Term; K2]; 1×Carbamidomethyl [C26]; 1×Phospho [S3(100)]	331284178 1×Phospho [S2413(100)]	0.000189844	0.00012481	1	3	6	331284176; 331284180; 331284178	331284178 [2411-2438]	1	3373.64	S3(Phospho): 100	1.27	1.38	1.35	2.09	1.77	1.84	1.37	1.56	1.33	2.09	2.33	2.03	6.32194	High	2.03e-05	6.96e-05	8.72	High	8.27e-05	1	S3(Phospho): 100	S3;	331284178	NP_006303.4	PSSRKAKsPAPGLAS	No
RUNX2	860	runt-related transcription factor 2 isoform a [Homo sapiens]	S28	RFsPPSSSLQPGK	226442783	2×TMT6plex [N-Term; K13]; 1×Phospho [S3(100)]	226442783 1×Phospho [S28(100)]	0.00288059	0.00036439	1	3	4	226442783; 226442791; 511093989	226442783 [26-38]	1	1926.03	S3(Phospho): 100	1.14	2.13	1.09	1.21	1.72	2.59	1.29	1.96	1.19	1.32	1.77	1.88	4.08079	High	0.0001218	0.0005421	15.65	High	0.002546	1	S3(Phospho): 100	S3;	226442783	NP_001019801.3	PSTSRRFsPPSSSLQ	Yes
MTFR1	9650	mitochondrial fission regulator 1 isoform 3 [Homo sapiens]	S290	SDsQDEVEK	224994164	2×TMT6plex [N-Term; K9]; 1×Deamidated [Q4]; 1×Phospho [S3(100)]	224994164 1×Phospho [S290(100)]	0.0259914	0.00144266	1	3	4	224994164; 224994162; 224994160	224994164 [288-296]	0	1575.72	S3(Phospho): 100	1.13	0.98	1.21	1.53	4.23	1.51	0.82	0.93	1.08	0.86	2.04	0.8	2.84356	High	0.0003576	0.00431	22.3	High	0.0006409	1	S3(Phospho): 100	S3;	224994164	NP_001139311.1	AYRYRSDsQDEVEKG	Yes
FNDC3B	64778	fibronectin type III domain-containing protein 3B [Homo sapiens]	S208	LNsPPSSIYK	205360932	2×TMT6plex [N-Term; K10]; 1×Phospho [S3(100)]	205360932 1×Phospho [S208(100)]	0.00313262	0.00036439	1	1	2	205360932	205360932 [206-215]	0	1643.88	S3(Phospho): 100	1.02	1.42	1.06	2.44	1.65	2.25							3.1441	High	0.0001561	0.001315	32.14	High	0.0001435	1	S3(Phospho): 100	S3;	205360932	NP_073600.3	DRQNRLNsPPSSIYK	Yes
GATA3	2625	trans-acting T-cell-specific transcription factor GATA-3 isoform 1 [Homo sapiens]	S162	DVsPDPSLSTPGSAGSAR	50541959	1×TMT6plex [N-Term]; 1×Phospho [S3(100)]	50541959 1×Phospho [S162(100)]	7.4e-05	9e-05	1	2	8	4503929; 50541959	50541959 [160-177]	0	2009.94	S3(Phospho): 100	1.01	1.13	1.07	2.03	2.47	1.37	0.85	1.22	1.13	2.22	2.58	1.02	5.26113	High	2.03e-05	3.11e-05	27.74	High	6.51e-05	1	S3(Phospho): 100	S3;	50541959	NP_001002295.1	PTPPKDVsPDPSLST	Yes
ENSA	2029	alpha-endosulfine isoform 1 [Homo sapiens]	S43	YPsLGQKPGGSDFLMK	46389550	3×TMT6plex [N-Term; K7; K16]; 1×Phospho [S3(100)]	46389550 1×Phospho [S43(100)]	0.0153266	0.000919342	1	8	4	46389554; 46389552; 46389562; 46389556; 46389550; 46389558; 46389560; 4758272	46389550 [41-56]	0	2492.32	S3(Phospho): 100	0.95	1.58	3.85	1.7	2.18	1.41	0.94	1.74	4.35	1.64	1.75	1.21	3.34621	High	0.0002269	0.002535	7.63	High	0.009617	1	S3(Phospho): 100	S3;	46389550	NP_996925.1	KLKAKYPsLGQKPGG	Yes
FAM110C	642273	protein FAM110C [Homo sapiens]	S202	SQsDLSSR	284447294	1×TMT6plex [N-Term]; 1×Phospho [S3(100)]	284447294 1×Phospho [S202(100)]	0.0968677	0.00441309	1	1	3	284447294	284447294 [200-207]	0	1188.55	S3(Phospho): 100	0.84	0.75	0.67	2.14	2.05	0.76							2.81611	High	0.004169	0.08504	12.7	High	0.003038	1	S3(Phospho): 100	S3;	284447294	NP_001071178.2	RGLQRSQsDLSSRYS	Yes
LASP1	3927	LIM and SH3 domain protein 1 isoform a [Homo sapiens]	S146	RDsQDGSSYR	5453710	1×TMT6plex [N-Term]; 1×Phospho [S3(100)]	5453710 1×Phospho [S146(100)]	0.000943468	0.000214298	1	2	29	410444379; 5453710	5453710 [144-153]	1	1479.64	S3(Phospho): 100	0.74	2.26	1.37	1.71	2.01	1.27	0.95	2.23	1.61	2.8	2.5	1.86	4.99701	High	6.84e-05	0.0002867	34.44	High	0.000139	1	S3(Phospho): 100	S3;	5453710	NP_006139.1	MEPERRDsQDGSSYR	Yes
SCAF11	9169	protein SCAF11 [Homo sapiens]	S796; S802	FHsPSTTWsPNKDTPQEK	117676384	3×TMT6plex [N-Term; K12; K18]; 2×Phospho [S3(100); S9(100)]	117676384 2×Phospho [S796(100); S802(100)]	0.000742463	0.000193352	1	1	13	117676384	117676384 [794-811]	1	2934.4	S3(Phospho): 100; S9(Phospho): 99.98	1.4	1.14	1.19	1.62	2.1	1.46	1.21	1.06	1.18	1.45	1.52	0.95	5.25609	High	5.93e-05	0.0001954	25.33	High	8.79e-05	1	S3(Phospho): 100; S9(Phospho): 99.98	S3; S9;	117676384	NP_004710.2	TRRSRFHsPSTTWSP;HSPSTTWsPNKDTPQ	Yes;Yes
VIM	7431	vimentin [Homo sapiens]	S39	TYsLGSALRPSTSR	62414289	1×TMT6plex [N-Term]; 1×Phospho [S3(98.7)]	62414289 1×Phospho [S39(98.7)]	0.00976669	0.000765738	1	1	4	62414289	62414289 [37-50]	0	1804.92	S3(Phospho): 97.01	1.55	1.29	2.31	1.03	0.77	2.88	1.93	2.2	3.37	1.52	1.3	4.62	2.86011	High	0.0001912	0.001623	9.91	High	0.0002223	1	S3(Phospho): 97.01	S3;	62414289	NP_003371.2	TTSTRTYsLGSALRP	Yes
R3HDM1	23518	R3H domain-containing protein 1 isoform a [Homo sapiens]	S381	ASsFSGISVLTR	544346243	1×TMT6plex [N-Term]; 1×Phospho [S3(99)]	544346243 1×Phospho [S381(99)]	0.12441	0.00631808	1	4	2	544346243; 544346282; 544346269; 31543535	544346243 [379-390]	0	1533.79	S3(Phospho): 99	1.21	1.18	2.52	2.24	1.29	1.71							2.89296	High	0.001344	0.02379	16.69	High	0.003041	1	S3(Phospho): 99	S3;	544346243	NP_001269727.1	PAVTKASsFSGISVL	Yes
ARPC1B	10095	actin-related protein 2/3 complex subunit 1B [Homo sapiens]	S310	KAsSEGGTAAGAGLDSLHK	5031601	3×TMT6plex [N-Term; K19; K]; 1×Phospho [S3(99.2)]	5031601 1×Phospho [S310(99.2)]	4.27e-05	6.55e-05	1	1	15	5031601	5031601 [308-326]	1	2524.34	S3(Phospho): 99.2	1.45	0.76	2.91	2.01	1.63	1.58	1.87	1.11	3.44	2.07	1.41	1.47	8.97703	High	0	1.15e-05	43.48	High	2.27e-05	1	S3(Phospho): 99.2	S3;	5031601	NP_005711.1	QNLDKKAsSEGGTAA	Yes
EIF4B	1975	eukaryotic translation initiation factor 4B isoform 1 [Homo sapiens]	S502; S503	SQssDTEQQSPTSGGGK	664805999	2×TMT6plex [N-Term; K17]; 2×Phospho [S4(97.7); S10(100)]	664805999 2×Phospho [S503(97.7); S509(100)]	0.000106648	9e-05	1	2	51	664805999; 50053795	664805999 [500-516]	0	2298.99	S3(Phospho): 99.96; S4(Phospho): 98.61	1.87	1.45	1.77	1.33	2.11	1.64	1.59	1.32	1.49	1.12	1.52	1.51	6.01081	High	2.03e-05	5.39e-05	41.19	High	0.0001716	1	S3(Phospho): 99.96; S4(Phospho): 98.61	S3; S4;	664805999	NP_001287750.1	NPPARSQsSDTEQQS;PPARSQSsDTEQQSP	No;No
SRRM2	23524	serine/arginine repetitive matrix protein 2 [Homo sapiens]	S954	SVsPCSNVESR	118572613	1×TMT6plex [N-Term]; 1×Carbamidomethyl [C5]; 1×Phospho [S3(100)]	118572613 1×Phospho [S954(100)]	0.0309656	0.00166394	1	1	6	118572613	118572613 [952-962]	0	1530.68	S3(Phospho): 99.99	1.51	1.13	1.18	2.97	1.24	1.18	1.71	1.26	1.13	2.64	1.45	1.3	2.71587	High	0.0003967	0.005194	21.58	High	0.0004163	1	S3(Phospho): 99.99	S3;	118572613	NP_057417.3	PRRSRSVsPCSNVES	Yes
NAV1	89796	neuron navigator 1 isoform 1 [Homo sapiens]	S648	KTsLDVSNSAEPGFLAPGAR	267844811	2×TMT6plex [N-Term; K]; 1×Phospho [S3(100)]	267844811 1×Phospho [S648(100)]	4.88e-05	6.55e-05	1	2	5	267844813; 267844811	267844811 [646-665]	1	2555.33	S3(Phospho): 99.99	1.29	2.19	1.36	1.95	1.12	2.03	1.32	2.75	2.46	7.09	0.99	5.72	8.53708	High	1.3e-05	2.19e-05	54.09	High	5.72e-05	1	S3(Phospho): 99.99	S3;	267844811	NP_065176.3	PVNGRKTsLDVSNSA	Yes
WDR62	284403	WD repeat-containing protein 62 isoform 1 [Homo sapiens]	S1330	LTLSSACDGLLQPPVDTQPGVTVPAVSFPAPsPVEESALR	145580608	1×TMT6plex [N-Term]; 1×Deamidated [Q]; 1×Carbamidomethyl [C7]; 1×Phospho [S32(99.9)]	145580608 1×Phospho [S1330(99.9)]	5.72e-05	6.55e-05	1	2	11	145580608; 145580610	145580608 [1299-1338]	0	4413.21	S32(Phospho): 99.91	1.97	2.67	2.72	1.44	1.58	2	1.89	1.4	1.47		1.34	1.46	5.58911	High	1.3e-05	2.55e-05	24.67	High	2.27e-05	1	S32(Phospho): 99.91	S32;	145580608	NP_001077430.1	AVSFPAPsPVEESAL	No
DNLZ	728489	DNL-type zinc finger protein [Homo sapiens]	S171	VAGEGALELVLEAAGAPTSTAAPEAGEDEGPPsPGKTEPS	124249392	2×TMT6plex [N-Term; K36]; 1×Phospho [S33(95.2)]	124249392 1×Phospho [S171(95.2)]	0.000282162	0.000147488	1	1	14	124249392	124249392 [139-178]	1	4298.1	S33(Phospho): 93.93	3.76	1.94	0.64										3.96742	High	2.03e-05	8.79e-05	19.31	High	8.36e-05	1	S33(Phospho): 93.93	S33;	124249392	NP_001074318.1	GEDEGPPsPGKTEPS	No
ARMC1	55156	armadillo repeat-containing protein 1 isoform 1 [Homo sapiens]	S246	SESGEEMLVPFQDTPVEVEQNTELPDYLPEDEsPTKEQDK	8922479	3×TMT6plex [N-Term; K36; K40]; 1×Deamidated [Q38; N/Q]; 1×Phospho [S33(99.9)]	8922479 1×Phospho [S246(99.9)]	0.000284051	0.000147488	1	2	10	8922479; 557878591	8922479 [214-253]	1	5347.51	S33(Phospho): 99.91	0.83	0.86	1.22	2.03	1.59	1.27	2.05	1.71	1.3	1.76	1.81	2.08	5.51353	High	2.03e-05	8.84e-05	12.86	High	0.0001961	1	S33(Phospho): 99.91	S33;	8922479	NP_060590.1	DYLPEDEsPTKEQDK	Yes
SLC3A2	6520	4F2 cell-surface antigen heavy chain isoform b [Homo sapiens]	S55	QLPGSHSEAGVQGLSAGDDSETGSDCVTQAGLQLLASsDPPALASK	61744477	2×TMT6plex [N-Term; K46]; 3×Deamidated [Q29; Q33; Q]; 1×Carbamidomethyl [C26]; 1×Phospho [S/T]		4.27e-05	6.55e-05	1	1	28	61744477	61744477 [18-63]	0	5050.38	S38(Phospho): 88.77	1.43	1.6	2.93	1.46	3.28	1.31							6.59046	High	0	1.53e-05	40	High	1.91e-05	1	S38(Phospho): 88.77	S38;	61744477	NP_001012680.1	GLQLLASsDPPALAS	No
ZSWIM8	23053	zinc finger SWIM domain-containing protein 8 isoform 3 [Homo sapiens]	S1130	GWGsPGRPK	335334964	2×TMT6plex [N-Term; K9]; 1×Phospho [S4(100)]	335334964 1×Phospho [S1130(100)]	0.114527	0.0056468	1	3	3	335334964; 335334962; 122114658	335334964 [1127-1135]	0	1479.79	S4(Phospho): 100	2.39	2.1	1.94	1.2	1.65	1.97	1.87	1.84	1.62	0.94	1.42	1.68	2.21357	High	0.005689	0.1166	8.51	High	0.001268	1	S4(Phospho): 100	S4;	335334964	NP_001229417.1	YNGRGWGsPGRPKKK	Yes
LCP1	3936	plastin-2 [Homo sapiens]	S257	EGEsLEDLMK	167614506	2×TMT6plex [N-Term; K10]; 1×Oxidation [M9]; 1×Phospho [S4(100)]	167614506 1×Phospho [S257(100)]	0.035284	0.00185874	1	1	5	167614506	167614506 [254-263]	0	1704.82	S4(Phospho): 100	1.52	1.43	0.95	4.04	1.4	3.07	1.09	0.84	0.68	2.89	1.63	2.21	3.09843	High	0.0006087	0.008748	17.11	High	0.0007027	1	S4(Phospho): 100	S4;	167614506	NP_002289.2	ALLREGEsLEDLMKL	Yes
BOD1L1	259282	biorientation of chromosomes in cell division protein 1-like 1 [Homo sapiens]	S3019	TQLsPSIK	87299628	2×TMT6plex [N-Term; K8]; 1×Phospho [S4(100)]	87299628 1×Phospho [S3019(100)]	0.0109316	0.000778694	1	1	10	87299628	87299628 [3016-3023]	0	1411.8	S4(Phospho): 100	1.31	1.16	1.6	0.89	1.94	2.14	1.25	0.78	1.33	1.02	1.31	1.9	2.90736	High	0.0001985	0.001806	22.63	High	0.002467	1	S4(Phospho): 100	S4;	87299628	NP_683692.2	QRSKTQLsPSIKRKR	Yes
SRRM1	10250	serine/arginine repetitive matrix protein 1 isoform 1 [Homo sapiens]	S687	EARsPQPNK	742799254	2×TMT6plex [N-Term; K9]; 1×Phospho [S4(100)]	742799254 1×Phospho [S687(100)]	0.0286892	0.00150426	1	3	4	42542379; 742799254; 742799283	742799254 [684-692]	1	1564.82	S4(Phospho): 100	1.29	1.82	0.98	2.32	0.98	4.76							3.85619	High	0.001316	0.02328	5.54	Medium	0.01753	1	S4(Phospho): 100	S4;	742799254	NP_001290377.1	RSTREARsPQPNKRH	No
ESYT2	57488	extended synaptotagmin-2 [Homo sapiens]	S663; S665	SHMsGsPGPGGSNTAPSTPVIGGSDKPGMEEK	45387945	3×TMT6plex [N-Term; K26; K32]; 2×Phospho [S4(97.7); S6(100)]	45387945 2×Phospho [S663(97.7); S665(100)]	0.000151352	9e-05	1	1	2	45387945	45387945 [660-691]	0	3900.82	S4(Phospho): 97.66; S6(Phospho): 100	1.28	1.53	2.12	1.31	1.81	1.8							5.43502	High	2.03e-05	5.15e-05	13.34	High	0.0001301	1	S4(Phospho): 97.66; S6(Phospho): 100	S4; S6;	45387945	NP_065779.1	TSIKSHMsGSPGPGG;IKSHMSGsPGPGGSN	No;No
SCAF11	9169	protein SCAF11 [Homo sapiens]	S587	ITEsSLVEITEHK	117676384	2×TMT6plex [N-Term; K13]; 1×Phospho [S4(98.7)]	117676384 1×Phospho [S587(98.7)]	0.000545437	0.000193352	1	1	6	117676384	117676384 [584-596]	0	2024.07	S4(Phospho): 98.7	1.43	1.3	1.74	1.56	2.24	1.91	1.09	1.23	1.23	1.22	1.55	1.27	4.47628	High	5.93e-05	0.000241	29.71	High	0.0001716	1	S4(Phospho): 98.7	S4;	117676384	NP_004710.2	NEEKITEsSLVEITE	No
MLLT6	4302	protein AF-17 [Homo sapiens]	S258	RPEsPPSILTPPVVPTADK	57222568	2×TMT6plex [N-Term; K19]; 1×Phospho [S4(100)]	57222568 1×Phospho [S258(100)]	0.00137526	0.000236062	1	1	5	57222568	57222568 [255-273]	0	2539.39	S4(Phospho): 99.98	1.59	0.91	1.55	1.91	2.05	1.78	0.76	1.46	1.75	1.25	2.11	1.39	3.3707	High	7.18e-05	0.0003002	10.27	High	0.0001811	1	S4(Phospho): 99.98	S4;	57222568	NP_005928.2	KHKKRPEsPPSILTP	Yes
MADD	8567	MAP kinase-activating death domain protein isoform d [Homo sapiens]	S1239	GTLsDSEIETNSATSTIFGK	209862994	2×TMT6plex [N-Term; K20]; 1×Phospho [S4(100)]	209862994 1×Phospho [S1239(99.1)]	7.81e-05	9e-05	1	10	52	209862979; 209862971; 209862994; 209862975; 209571517; 209862983; 209862998; 18860873; 209862987; 209863002	209862994 [1236-1255]	0	2596.28	S4(Phospho): 99.99	1.39	1.85	1.65	2.43	1.82	1.56	1.32	1.25	1.26	2.01	1.32	1.3	6.01513	High	2.03e-05	3.23e-05	37.27	High	7.92e-05	1	S4(Phospho): 99.99	S4;	209862994	NP_003673.3	ASSRGTLsDSEIETN	Yes
TRIO	7204	triple functional domain protein [Homo sapiens]	S2455	AGAAsPLNSPLSSAVPSLGK	45439359	2×TMT6plex [N-Term; K20]; 1×Deamidated [N8]; 1×Phospho [S5(100)]	45439359 1×Phospho [S2455(100)]	0.000195974	0.00012481	1	1	4	45439359	45439359 [2451-2470]	0	2363.26	S5(Phospho): 100	2.24	1.95	2.17	1.61	1.5	1.22	2.86	2.32	1.89	1.93	1.97	1.37	4.42255	High	2.03e-05	6.4e-05	20.51	High	7.92e-05	1	S5(Phospho): 100	S5;	45439359	NP_009049.2	KPRAGAAsPLNSPLS	Yes
YTHDC2	64848	probable ATP-dependent RNA helicase YTHDC2 [Homo sapiens]	S1221	VLMKsPSPALHPPQK	269847874	3×TMT6plex [N-Term; K4; K15]; 1×Phospho [S5(100)]	269847874 1×Phospho [S1221(100)]	0.000732593	0.000193352	1	1	6	269847874	269847874 [1217-1231]	1	2397.37	S5(Phospho): 100	1.09	1.35	1.5	1.07	2.02	1.22	1.19	1.26	1.16	1.07	1.61	1.06	4.99823	High	5.93e-05	0.0001866	16.86	High	0.0002223	1	S5(Phospho): 100	S5;	269847874	NP_073739.3	AERVLMKsPSPALHP	Yes
AKAP12	9590	A-kinase anchor protein 12 isoform 1 [Homo sapiens]	S381	VELPsEEQVSGSQGPSEEKPAPLATEVFDEK	21493022	3×TMT6plex [N-Term; K19; K31]; 1×Deamidated [Q13]; 1×Phospho [S5(100)]	21493022 1×Phospho [S381(100)]	6.64e-05	6.55e-05	1	2	11	21493022; 21493024	21493022 [377-407]	0	4082.03	S5(Phospho): 100	1.08	2.57	1.26	3.3	1.09	1.06							5.98277	High	1.3e-05	2.88e-05	29.71	High	8.36e-05	1	S5(Phospho): 100	S5;	21493022	NP_005091.2	YEKVELPsEEQVSGS	Yes
WDR75	84128	WD repeat-containing protein 75 isoform 1 [Homo sapiens]	S796	VQDTsNTGLGEDIIHQLSK	29789283	2×TMT6plex [N-Term; K19]; 1×Phospho [S5(97.9)]	29789283 1×Phospho [S796(97.9)]	6.19e-05	6.55e-05	1	2	47	29789283; 733606555	29789283 [792-810]	0	2593.33	S5(Phospho): 97.48	1.91	1.68	1.16	1.26	2.12	1.29	2.14	1.9	1.5	1.63	2.55	1.84	6.81777	High	1.3e-05	2.72e-05	32.74	High	8.27e-05	1	S5(Phospho): 97.48	S5;	29789283	NP_115544.1	TEKVQDTsNTGLGED	Yes
PNISR	25957	arginine/serine-rich protein PNISR [Homo sapiens]	S290	SKFDsDEEEEDTENVEAASSGK	154146193	3×TMT6plex [N-Term; K2; K22]; 1×Phospho [S5(98.9)]	154146193 1×Phospho [S290(98.9)]	0.000179375	0.00012481	1	1	6	154146193	154146193 [286-307]	1	3170.45	S5(Phospho): 98.87	1.36	1.72	1.28	1.75	2.06	2.12							5.11333	High	2.03e-05	5.93e-05	40.94	High	0.0001674	1	S5(Phospho): 98.87	S5;	154146193	NP_116259.2	PQRSKFDsDEEEEDT	Yes
PTDSS1	9791	phosphatidylserine synthase 1 isoform 1 [Homo sapiens]	S442	GSEDsPPKHAGNNESHSSR	7662647	2×TMT6plex [N-Term; K8]; 1×Phospho [S5(100)]	7662647 1×Phospho [S442(100)]	5.31e-05	6.55e-05	1	2	15	7662647; 589811544	7662647 [438-456]	1	2531.17	S5(Phospho): 99.99	2.21	2.03	0.93	0.7	1.01	0.97	2.36	2.45	1.18	0.8	1.37	1.26	6.51554	High	1.3e-05	2.39e-05	29.3	High	3.2e-05	1	S5(Phospho): 99.99	S5;	7662647	NP_055569.1	GTKGSEDsPPKHAGN	Yes
MELK	9833	maternal embryonic leucine zipper kinase isoform 1 [Homo sapiens]	S356	SNNWsLEDVTASDK	7661974	2×TMT6plex [N-Term; K14]; 1×Phospho [S5(100)]	7661974 1×Phospho [S356(100)]	0.000999175	0.000214298	1	8	7	375493542; 375493546; 375493540; 375340329; 375493538; 375493536; 375493544; 7661974	7661974 [352-365]	0	2104	S5(Phospho): 99.99	2.08	1.69	1.85	1.16	1.48	2.71	1.48	1.35	1.61	1.05	1.65	1.88	4.54938	High	5.93e-05	0.0002353	29.27	High	0.0001895	1	S5(Phospho): 99.99	S5;	7661974	NP_055606.1	DIKSNNWsLEDVTAS	Yes
NAV1	89796	neuron navigator 1 isoform 1 [Homo sapiens]	S808	VNSNsLDLPSSSDTTHASK	267844811	2×TMT6plex [N-Term; K19]; 1×Phospho [S5(100)]	267844811 1×Phospho [S808(100)]	4.36e-05	6.55e-05	1	2	5	267844813; 267844811	267844811 [804-822]	0	2498.22	S5(Phospho): 99.99	0.91	0.92	1.16	3.27	0.75	2.68							6.41327	High	1.3e-05	1.82e-05	54.94	High	1.91e-05	1	S5(Phospho): 99.99	S5;	267844811	NP_065176.3	LDKVNSNsLDLPSSS	Yes
PHF3	23469	PHD finger protein 3 isoform 1 [Homo sapiens]	S283	AKPVGsPLFK	7662018	3×TMT6plex [N-Term; K2; K10]; 1×Phospho [S6(100)]	7662018 1×Phospho [S283(100)]	0.00609756	0.000503144	1	3	12	7662018; 589908394; 589908396	7662018 [278-287]	0	1811.08	S6(Phospho): 100	2.09	1.7	1.62	1.47	1.44	1.39	2.17	1.78	1.71	1.73	1.77	1.55	3.15792	High	0.0009407	0.01593	15.15	High	0.0001716	1	S6(Phospho): 100	S6;	7662018	NP_055968.1	CKAKPVGsPLFKFSD	Yes
ZNF622	90441	zinc finger protein 622 [Homo sapiens]	S143	AQPSMsPK	15529978	2×TMT6plex [N-Term; K8]; 1×Phospho [S6(100)]	15529978 1×Phospho [S143(100)]	0.00638873	0.000523051	1	1	21	15529978	15529978 [138-145]	0	1383.71	S6(Phospho): 100	1.8	3	1.9	1.66	1.92	1.58	1.62	2.59	1.56	1.56	1.7	1.39	3.9715	High	0.0002809	0.00306	29.32	High	0.0001929	1	S6(Phospho): 100	S6;	15529978	NP_219482.1	IKAQPSMsPKKAPPA	Yes
TNS3	64759	tensin-3 [Homo sapiens]	S1149	ASEAAsPLPDSPGDK	65288071	2×TMT6plex [N-Term; K15]; 1×Phospho [S6(100)]	65288071 1×Phospho [S1149(100)]	0.000161217	9e-05	1	1	12	65288071	65288071 [1144-1158]	0	1979.97	S6(Phospho): 100	1.24	4.15	1.66	3.03	1.39	1.37	1.17	2.67	1.09	1.79	1.25	1.04	4.99988	High	2.03e-05	5.42e-05	45.57	High	7.72e-05	1	S6(Phospho): 100	S6;	65288071	NP_073585.8	SKASEAAsPLPDSPG	Yes
NSUN2	54888	tRNA (cytosine(34)-C(5))-methyltransferase isoform 1 [Homo sapiens]	S456	ESTQLsPADLTEGKPTDPSK	39995082	3×TMT6plex [N-Term; K14; K20]; 1×Phospho [S6(100)]	39995082 1×Phospho [S456(100)]	7.34e-05	9e-05	1	2	21	39995082; 301336155	39995082 [451-470]	0	2868.48	S6(Phospho): 100	1.11	0.87	1.76	1.26	2.29	1.22	1.18	0.86	1.84	1.54	2.47	1.32	6.07333	High	2.03e-05	3.51e-05	34.06	High	6.51e-05	1	S6(Phospho): 100	S6;	39995082	NP_060225.4	TRESTQLsPADLTEG	Yes
MYO9B	4650	unconventional myosin-IXb isoform 1 [Homo sapiens]	S717	AAGMSsPGAQSHPEELPR	33356170	1×TMT6plex [N-Term]; 1×Phospho [S6(99)]	33356170 1×Phospho [S717(99)]	6.92e-05	6.55e-05	1	2	4	194272142; 33356170	33356170 [712-729]	0	2130.98	S6(Phospho): 98.97	2.17	1.91	1.69	1.12	2.13	1.55							4.87033	High	2.03e-05	3.24e-05	32.04	High	2.27e-05	1	S6(Phospho): 98.97	S6;	33356170	NP_004136.2	EKAAGMSsPGAQSHP	Yes
PHLDB1	23187	pleckstrin homology-like domain family B member 1 isoform a [Homo sapiens]	S461	ELPPLsPSLSR	221219024	1×TMT6plex [N-Term]; 1×Phospho [S6(100)]	221219024 1×Phospho [S461(100)]	0.0350132	0.0018164	1	2	7	221219024; 221219026	221219024 [456-466]	0	1504.8	S6(Phospho): 99.99	1.94	1.77	1.79	2.01	1.68	1.96	0.64	1.32	0.81	1.04	0.71	0.66	2.75752	High	0.00264	0.05151	28.56	High	0.0004087	1	S6(Phospho): 99.99	S6;	221219024	NP_001138230.1	MRELPPLsPSLSRRA	Yes
GPATCH4	54865	G patch domain-containing protein 4 isoform 1 [Homo sapiens]	S135	DLESCsDDDNQGSK	33356552	2×TMT6plex [N-Term; K14]; 1×Carbamidomethyl [C5]; 1×Phospho [S6(100)]	33356552 1×Phospho [S135(100)]	0.000417175	0.000193352	1	2	22	33356552; 33356550	33356552 [130-143]	0	2107.89	S6(Phospho): 99.99	1.35	1.02	1.46	1.03	2.15	1.28	1.31	0.94	1.4	1.04	1.99	1.28	4.17228	High	7.41e-05	0.0003867	52.53	High	9.88e-05	1	S6(Phospho): 99.99	S6;	33356552	NP_056405.2	NKDLESCsDDDNQGS	No
LLGL2	3993	lethal(2) giant larvae protein homolog 2 isoform c [Homo sapiens]	S965	NSGTQsDGEEK	73427803	2×TMT6plex [N-Term; K11]; 1×Phospho [S6(100)]	73427803 1×Phospho [S965(100)]	0.128189	0.00645783	1	2	4	62739161; 73427803	73427803 [960-970]	0	1689.77	S6(Phospho): 99.99	0.58	0.6	1.42	3.64	3.04	1.05	0.98	0.79	2.09	4.96	3.46	1.21	2.39328	High	0.001381	0.02464	12.48	High	0.002749	1	S6(Phospho): 99.99	S6;	73427803	NP_001026973.1	ARNSGTQsDGEEKQP	Yes
LIMCH1	22998	LIM and calponin homology domains-containing protein 1 isoform a [Homo sapiens]	S303	SWSTATsPLGGERPFR	163310741	1×TMT6plex [N-Term]; 1×Phospho [S7(98.6)]	163310741 1×Phospho [S303(98.6)]	0.00151085	0.000236062	1	7	8	163310747; 163310749; 163310743; 163310741; 574285787; 574285545; 163310745	163310741 [297-312]	0	2058	S7(Phospho): 98.65	0.81	3.13	1.21	2.79	1.78	1.74	0.87	2.31	0.89	1.66	1.3	1.03	3.25145	High	7.18e-05	0.0003228	9.96	High	0.0001505	1	S7(Phospho): 98.65	S7;	163310741	NP_055803.2	KSWSTATsPLGGERP	Yes
ARFGEF1	10565	brefeldin A-inhibited guanine nucleotide-exchange protein 1 [Homo sapiens]	S52	AETEKQsPPHGEAK	51479145	3×TMT6plex [N-Term; K5; K14]; 1×Phospho [S7(100)]	51479145 1×Phospho [S52(100)]	0.00421353	0.000383028	1	1	13	51479145	51479145 [46-59]	1	2276.19	S7(Phospho): 99.98	1.93	1.35	1.38	2.49	2.13	1.53	1.43	0.97	0.79	1.76	1.36	1.03	3.89612	High	0.0001218	0.0007462	10.3	High	0.000952	1	S7(Phospho): 99.98	S7;	51479145	NP_006412.2	KAETEKQsPPHGEAK	Yes
SLX4IP	128710	protein SLX4IP [Homo sapiens]	S396	LSTIQNsPTK	61102723	2×TMT6plex [N-Term; K10]; 1×Phospho [S7(100)]	61102723 1×Phospho [S396(100)]	0.0549576	0.00248252	1	1	2	61102723	61102723 [390-399]	0	1626.89	S7(Phospho): 99.99	2.42	1.53	2.01	1	1.35	1.31							2.74265	High	0.00201	0.03789	12.6	High	0.0006089	1	S7(Phospho): 99.99	S7;	61102723	NP_001009608.1	RLSTIQNsPTKKRKK	Yes
MTCL1	23255	microtubule cross-linking factor 1 [Homo sapiens]	S1342	GSGVTSsPHK	163644316	2×TMT6plex [N-Term; K10]; 1×Phospho [S7(100)]	163644316 1×Phospho [S1342(100)]	0.0145651	0.000870764	1	1	6	163644316	163644316 [1336-1345]	0	1494.77	S7(Phospho): 99.99	1.86	1.78	2.44	1.74	1.4	2.51	1.99	2.48	3.37	2.07	1.57	3.14	3.00411	High	0.0002235	0.002402	12.43	High	0.0003027	1	S7(Phospho): 99.99	S7;	163644316	NP_056025.2	RGSGVTSsPHKCLTP	No
ANKHD1-EIF4EBP3	404734	ANKHD1-EIF4EBP3 protein [Homo sapiens]	S1591	GGGAGGNsDSDNLDSTDCNSESSSGGK	37620163	2×TMT6plex [N-Term; K27]; 1×Carbamidomethyl [C18]; 1×Phospho [S8(100)]	37620163 1×Phospho [S1591(100)]	4.34e-05	6.55e-05	1	2	4	37620163; 46519147	37620163 [1584-1610]	0	3070.26	S8(Phospho): 100	2.63	2.4	1.45	1.47	1.09	1.03	1.93	2.16	1.67	1.14	1.28	0.87	6.54001	High	0	1.79e-05	98.24	High	1.91e-05	1	S8(Phospho): 100	S8;	37620163	NP_065741.3	GGGAGGNsDSDNLDS	Yes
FOXK1	221937	forkhead box protein K1 [Homo sapiens]	S243; S257	SMVSPVPsPTGTISVPNSCPAsPR	82546824	1×TMT6plex [N-Term]; 1×Carbamidomethyl [C19]; 2×Phospho [S8(95.1); S22(100)]	82546824 2×Phospho [S243(95.1); S257(100)]	0.000656487	0.000193352	1	1	4	82546824	82546824 [236-259]	0	2814.28	S8(Phospho): 95.11; S22(Phospho): 100	2.06	2.04	1.55	1.47	1.62	1.68	1.09	1.03	0.86	0.71	0.72	0.86	3.45174	High	5.25e-05	0.0001719	5.5	High	0.0001622	1	S8(Phospho): 95.11; S22(Phospho): 100	S8; S22;	82546824	NP_001032242.1	SMVSPVPsPTGTISV;VPNSCPAsPRGAGSS	Yes;Yes
IFI16	3428	gamma-interferon-inducible protein 16 isoform 2 [Homo sapiens]	S720	DILNPDSsMETSPDFFF	112789562	1×TMT6plex [N-Term]; 1×Phospho [S/T]		8.1e-05	9e-05	1	2	14	112789562; 330864753	112789562 [713-729]	0	2270.98	S8(Phospho): 96.01	2.04	0.8	0.65	0.57	0.98	0.59	1.28	0.78	0.76	0.72	0.48	0.59	3.5431	High	5.25e-05	0.0001444	89.7	High	2.27e-05	1	S8(Phospho): 96.01	S8;	112789562	NP_005522.2	DILNPDSsMETSPDF	No
TBC1D4	9882	TBC1 domain family member 4 isoform 1 [Homo sapiens]	S787	VASPMNKsPSAMQQQDGLDR	114688046	2×TMT6plex [N-Term; K7]; 1×Phospho [S8(100)]	114688046 1×Phospho [S787(100)]	0.00250154	0.000314125	1	3	4	114688046; 557786174; 557786188	114688046 [780-799]	1	2698.31	S8(Phospho): 99.97	2.67	1.87	1.79	0.76	1.46	2.28	2.79	1.77	1.58	0.62	1.49	2.21	4.61018	High	9.7e-05	0.0004826	8.52	High	0.0002407	1	S8(Phospho): 99.97	S8;	114688046	NP_055647.2	VASPMNKsPSAMQQQ	Yes
PDCD11	22984	protein RRP5 homolog [Homo sapiens]	S1360	YSHVSQHsPSKK	70980549	3×TMT6plex [N-Term; K11; K12]; 1×Phospho [S8(100)]	70980549 1×Phospho [S1360(100)]	0.00148717	0.000236062	1	1	4	70980549	70980549 [1353-1364]	1	2152.15	S8(Phospho): 99.98	2.17	1.19	1.78	1.11	2.41	1.7							4.32074	High	0.0001524	0.001277	6.88	High	0.0003063	1	S8(Phospho): 99.98	S8;	70980549	NP_055791.1	YSHVSQHsPSKKALY	Yes
ARHGAP5	394	rho GTPase-activating protein 5 isoform a [Homo sapiens]	S1202	GSEEDPLLsPVETWK	71834863	2×TMT6plex [N-Term; K15]; 1×Phospho [S9(100)]	71834863 1×Phospho [S1202(100)]	0.000299795	0.000147488	1	2	8	71834863; 71834861	71834863 [1194-1208]	0	2225.11	S9(Phospho): 100	2.48	1.66	2.13	1.27	1.1	1.14	1.78	1.36	1.5	1.16	1.04	1	3.94856	High	2.03e-05	9.27e-05	24.14	High	8.27e-05	1	S9(Phospho): 100	S9;	71834863	NP_001025226.1	SEEDPLLsPVETWKG	Yes
TOX2	84969	TOX high mobility group box family member 2 isoform a [Homo sapiens]	S192	SSIAHSSPsPPGSK	149408144	2×TMT6plex [N-Term; K14]; 1×Phospho [S9(100)]	149408144 1×Phospho [S192(100)]	0.000116868	9e-05	1	3	4	149408146; 149408144; 14249636	149408144 [184-197]	0	1876.96	S9(Phospho): 100	1.68	1.61	2.35	1.55	2.42	1.76	1.78	1.56	2.27	1.54	2.6	1.9	4.71796	High	2.03e-05	4.29e-05	22.21	High	2.27e-05	1	S9(Phospho): 100	S9;	149408144	NP_001092267.1	SIAHSSPsPPGSKSA	No
AAK1	22848	AP2-associated protein kinase 1 [Homo sapiens]	S678	SATTTPSGsPR	148277037	1×TMT6plex [N-Term]; 1×Phospho [S9(100)]	148277037 1×Phospho [S678(100)]	0.00669559	0.000523051	1	1	21	148277037	148277037 [670-680]	0	1370.65	S9(Phospho): 100	1.28	0.76	1.42	2.38	2.27	1.41	1.35	0.74	1.68	3.15	3.76	1.48	3.58018	High	0.0004	0.005293	37.15	High	0.0002066	1	S9(Phospho): 100	S9;	148277037	NP_055726.3	ATTTPSGsPRTSQQN	Yes
WWP2	11060	NEDD4-like E3 ubiquitin-protein ligase WWP2 isoform WWP2-FL [Homo sapiens]	S211	TTPATGEQsPGAR	40806207	1×TMT6plex [N-Term]; 1×Phospho [S9(100)]	40806207 1×Phospho [S211(100)]	0.00180387	0.000236062	1	3	10	40806207; 394581985; 394581981	40806207 [203-215]	0	1581.75	S9(Phospho): 100	0.98	0.92	1.97	1.28	2.14	2.57	0.74	0.66	1.33	1.28	1.46	1.8	3.78674	High	0.0002127	0.002188	40.5	High	0.0001165	1	S9(Phospho): 100	S9;	40806207	NP_008945.2	TPATGEQsPGARSRH	Yes
TAB2	23118	TGF-beta-activated kinase 1 and MAP3K7-binding protein 2 isoform a [Homo sapiens]	S450	AIGNNSATsPR	14149669	1×TMT6plex [N-Term]; 1×Phospho [S9(98.8)]	14149669 1×Phospho [S450(98.8)]	0.00408279	0.000383028	1	2	9	635372947; 14149669	14149669 [442-452]	0	1396.68	S9(Phospho): 98.83	2.81	2.14	1	1.48	1.09	1.34	2.94	2.16	0.83	1.08	0.68	0.98	3.28816	High	0.001161	0.02034	33.14	High	0.0003556	1	S9(Phospho): 98.83	S9;	14149669	NP_055908.1	IGNNSATsPRVVVTQ	Yes
GAL	51083	galanin peptides preproprotein [Homo sapiens]	S116	LLDLPAAAsSEDIER	27804313	1×TMT6plex [N-Term]; 1×Phospho [S9(100)]	27804313 1×Phospho [S116(100)]	0.000129705	9e-05	1	1	9	27804313	27804313 [108-122]	0	1908.95	S9(Phospho): 99.99	1.29	2.09	1.27	1.08	1.57	1.22	1.17	1.33	0.85	1.06	0.99	1.21	3.72049	High	3.79e-05	0.0001162	60.4	High	2.27e-05	1	S9(Phospho): 99.99	S9;	27804313	NP_057057.2	LDLPAAAsSEDIERS	Yes
EPB41L3	23136	band 4.1-like protein 3 isoform 2 [Homo sapiens]	T487	GISQTNLITTVtPEKK	528281419	3×TMT6plex [N-Term; K15; K16]; 1×Phospho [T12(100)]	528281419 1×Phospho [T487(100)]	0.000163392	0.00012481	1	4	4	528281419; 528281421; 528281423; 32490572	528281419 [476-491]	1	2497.42	T12(Phospho): 100	2.4	1.23	1.35	1.79	1.22	1.24	2.41	0.8	0.74	1.06	0.34	0.4	5.18399	High	2.03e-05	5.48e-05	28.86	High	6.51e-05	1	T12(Phospho): 100	T12;	528281419	NP_001268462.1	TNLITTVtPEKKAEE	No
PLCL2	23228	inactive phospholipase C-like protein 2 isoform 1 [Homo sapiens]	T584	KLSSNCSGVEGDVtDEDEGAEMSQR	221219000	2×TMT6plex [N-Term; K]; 1×Carbamidomethyl [C6]; 1×Phospho [T14(100)]	221219000 1×Phospho [T584(100)]	4.36e-05	6.55e-05	1	2	4	221219000; 163644311	221219000 [571-595]	1	3238.43	T14(Phospho): 100	0.83	0.64	1.29	2.8	0.7	1.93	0.88	0.74	1.26	3.23	1.3	2.09	4.88022	High	1.3e-05	2.04e-05	64.77	High	1.91e-05	1	T14(Phospho): 100	T14;	221219000	NP_001137854.1	SGVEGDVtDEDEGAE	Yes
EYA3	2140	eyes absent homolog 3 isoform a [Homo sapiens]	T269	LSSGDPSTSPSLSQTtPSKDTDDQSR	26667243	2×TMT6plex [N-Term; K19]; 1×Phospho [T16(89.6)]	26667243 1×Phospho [T269(89.6)]	0.0520336	0.00246555	1	4	7	543173155; 543173153; 26667243; 543173157	26667243 [254-279]	1	3232.53	T16(Phospho): 89.59	1.73	0.96	1.53	0.82	1.43	2.13							2.55087	High	0.0006194	0.008966	4.31	High	0.002715	1	T16(Phospho): 89.59	T16;	26667243	NP_001981.2	SPSLSQTtPSKDTDD	Yes
MEA1	4201	male-enhanced antigen 1 [Homo sapiens]	T123	IQALGLHLPDPPLESEDEDEEGAtALNNHSSIPMDPEHVELVK	7657326	2×TMT6plex [N-Term; K43]; 1×Deamidated [N]; 1×Phospho [T/S]		4.56e-05	6.55e-05	1	1	60	7657326	7657326 [100-142]	0	5225.53	T24(Phospho): 97.21	1.26	1.85	2.41	2.2	1.94	1.94	1.47	1.38	1.26	1.58	1.78	1.2	7.20674	High	1.3e-05	2.01e-05	25.17	High	2.27e-05	1	T24(Phospho): 97.21	T24;	7657326	NP_055438.1	DEDEEGAtALNNHSS	No
SF3B1	23451	splicing factor 3B subunit 1 isoform 1 [Homo sapiens]	T434	LTAtPTPLGGMTGFHMQTEDR	54112117	1×TMT6plex [N-Term]; 1×Phospho [T4(100)]	54112117 1×Phospho [T434(100)]	4.27e-05	6.55e-05	1	1	7	54112117	54112117 [431-451]	0	2570.2	T4(Phospho): 99.99	1.14	1.12	1.48	2.02	1.44	2.97	1.35	1.84	1.82	2.18	1.63	4.01	7.11165	High	0	1.57e-05	69.13	High	1.91e-05	1	T4(Phospho): 99.99	T4;	54112117	NP_036565.2	PARKLTAtPTPLGGM	Yes
MDC1	9656	mediator of DNA damage checkpoint protein 1 [Homo sapiens]	T1567	SSVKtPESIVPIAPELQPSTSR	132626688	2×TMT6plex [N-Term; K4]; 1×Phospho [T5(96.8)]	132626688 1×Phospho [T1567(96.8)]	0.0541057	0.00248252	1	1	10	132626688	132626688 [1563-1584]	1	2861.54	T5(Phospho): 96.77	2.39	0.8	0.85		1.04	1.15							2.98301	High	0.000626	0.009331	14.9	High	0.001248	1	T5(Phospho): 96.77	T5;	132626688	NP_055456.2	TNRSSVKtPESIVPI	Yes
PRPF4B	8899	serine/threonine-protein kinase PRP4 homolog [Homo sapiens]	S93	EIIDASDKEGMsPAK	89276756	3×TMT6plex [N-Term; K8; K15]; 1×Phospho [S12(100)]	89276756 1×Phospho [S93(100)]	0.000264172	0.000147488	1	1	6	89276756	89276756 [82-96]	1	2358.22	S12(Phospho): 100	0.38	0.96	0.24	3.26	0.27	0.4	0.56	1.12	0.43	3.78	0.35	0.96	5.3911	High	2.03e-05	8.31e-05	25.13	High	8.27e-05	1	S12(Phospho): 100	S12;	89276756	NP_003904.3	ASDKEGMsPAKRTKL	Yes
ANK3	288	ankyrin-3 isoform 1 [Homo sapiens]	S1459	RQsFASLALR	32967601	1×TMT6plex [N-Term]; 1×Phospho [S3(100)]	32967601 1×Phospho [S1459(100)]	0.00112332	0.000214298	1	4	8	325053668; 32967601; 32967599; 325053666	32967601 [1457-1466]	1	1457.78	S3(Phospho): 100	0.3	0.34	0.49	1.72	4.43	0.29	0.54	0.61	0.52	1.45	3.61	0.47	4.74534	High	7.18e-05	0.0003248	40.98	High	0.0001264	1	S3(Phospho): 100	S3;	32967601	NP_066267.2	EKTDRRQsFASLALR	Yes
MYL12A	10627	myosin regulatory light chain 12A isoform 2 [Homo sapiens]	T24; S25	AtsNVFAMFDQSQIQEFK	740087210	2×TMT6plex [N-Term; K18]; 2×Phospho [T2(100); S3(100)]	740087210 2×Phospho [T24(100); S25(100)]	0.000142004	9e-05	1	5	53	29568111; 222144324; 740087210; 5453740; 31563524	740087210 [23-40]	0	2709.24	T2(Phospho): 100; S3(Phospho): 100	0.28	2.02	0.86	0.5	0.26	0.39	0.35	2.19	0.72	0.56	0.21	0.53	4.1336	High	0.0001985	0.001789	46.4	High	3.2e-05	1	T2(Phospho): 100; S3(Phospho): 100	T2; S3;	740087210	NP_001289978.1	KKRPQRAtSNVFAMF;KRPQRATsNVFAMFD	No;No
SH3BP1	23616	SH3 domain-binding protein 1 [Homo sapiens]	S544	TESEVPPRPAsPK	85815829	2×TMT6plex [N-Term; K13]; 1×Phospho [S11(100)]	85815829 1×Phospho [S544(100)]	0.0459275	0.00220301	1	1	12	85815829	85815829 [534-546]	0	1933.02	S11(Phospho): 100	0.37	0.37	0.65	0.98	2.39	1	0.34	0.36	0.52	1.02	2.46	0.94	3.52199	High	0.001295	0.02304	8.55	High	0.0004948	1	S11(Phospho): 100	S11;	85815829	NP_061830.3	EVPPRPAsPKVTRSP	Yes
AHNAK2	113146	protein AHNAK2 [Homo sapiens]	S842	MPsFGVSAPGK	156766050	2×TMT6plex [N-Term; K11]; 1×Phospho [S3(100)]	156766050 1×Phospho [S842(100)]; 1×Phospho [S1846(100)]; 1×Phospho [S3180(100)]; 1×Phospho [S4679(100)]; 1×Phospho [S6343(100)]; 1×Phospho [S8172(100)]; 1×Phospho [S10331(100)]; 1×Phospho [S12820(100)]; 1×Phospho [S15639(100)]; 1×Phospho [S18623(100)]; 1×Phospho [S21772(100)]; 1×Phospho [S25581(100)]; 1×Phospho [S29555(100)]; 1×Phospho [S33694(100)]; 1×Phospho [S37998(100)]	0.00761486	0.000546498	1	1	15	156766050	156766050 [840-850]; [1005-1015]; [1335-1345]; [1500-1510]; [1665-1675]; [1830-1840]; [2160-2170]; [2490-2500]; [2820-2830]; [2985-2995]; [3150-3160]; [3810-3820]; [3975-3985]; [4140-4150]; [4305-4315]	0	1615.83	S3(Phospho): 100	1.14	0.36	3.37	1.12	0.58	0.36	1.13	0.27	3.39	1.06	0.53	0.27	3.45085	High	0.0006087	0.008652	32.62	High	0.0004033	1	S3(Phospho): 100	S3;	156766050	NP_612429.2	MPKFKMPsFGVSAPG	Yes
ZNF185	7739	zinc finger protein 185 isoform 3 [Homo sapiens]	S466	REsCGSSVLTDFEGK	296010963	2×TMT6plex [N-Term; K15]; 1×Carbamidomethyl [C4]; 1×Phospho [S3(100)]	296010963 1×Phospho [S466(100)]	6.54e-05	6.55e-05	1	8	36	296010977; 148298722; 296010968; 296010966; 296010959; 296010981; 296010963; 296010961	296010963 [464-478]	1	2210.06	S3(Phospho): 100	0.37	0.43	1.2	2.19	1.44	1.02	0.29	0.47	1.21	2.2	1.5	0.98	6.9119	High	2.03e-05	3.28e-05	59.65	High	5.72e-05	1	S3(Phospho): 100	S3;	296010963	NP_001171579.1	EQLVRREsCGSSVLT	No
RAB11FIP5	26056	rab11 family-interacting protein 5 [Homo sapiens]	S174	NNLsASMFDLSMK	24308075	2×TMT6plex [N-Term; K13]; 1×Deamidated [N]; 1×Phospho [S]		0.00143362	0.000236062	1	1	11	24308075	24308075 [171-183]	0	1996.95	S4(Phospho): 99.36	0.45	2.61	1.05	1.59	0.3	1.81	0.63	1.93	1.12	0.84	0.54	1.03	3.61769	High	7.18e-05	0.0003099	31.56	High	0.0001264	1	S4(Phospho): 99.36	S4;	24308075	NP_056285.1	QFTRNNLsASMFDLS	Yes
LIMA1	51474	LIM domain and actin-binding protein 1 isoform 1 [Homo sapiens]	S230	ISENSYsLDDLEIGPGQLSSSTFDSEK	165905589	2×TMT6plex [N-Term; K27]; 1×Phospho [S7(99)]	165905589 1×Phospho [S230(99)]	6.62e-05	6.55e-05	1	3	13	165905589; 7705373; 165905591	165905589 [224-250]	0	3456.63	S7(Phospho): 98.98	0.49	0.47	0.41	2.23	1.2	0.65	1.07	0.99	0.72	2.06	1.56	1.14	5.54281	High	1.3e-05	2.87e-05	58.43	High	2.27e-05	1	S7(Phospho): 98.98	S7;	165905589	NP_001107018.1	KISENSYsLDDLEIG	Yes
CTNND1	1500	catenin delta-1 isoform 1ABC [Homo sapiens]	S352	GSLASLDsLRK	146231940	2×TMT6plex [N-Term; K11]; 1×Phospho [S8(100)]	146231940 1×Phospho [S352(100)]	0.0257953	0.00144266	1	15	7	332688212; 146231962; 146231970; 332688216; 146231940; 332688210; 332688208; 332634644; 146231991; 146231977; 332688214; 146231938; 10835010; 146231946; 332688220	146231940 [345-355]	1	1684.94	S8(Phospho): 100	0.3	0.97	1.12	2.64	0.47	0.48							3.15393	High	0.0006026	0.008412	26.71	High	0.0004087	1	S8(Phospho): 100	S8;	146231940	NP_001078927.1	GSLASLDsLRKGGPP	Yes
PTPN13	5783	tyrosine-protein phosphatase non-receptor type 13 isoform 4 [Homo sapiens]	S240	sMGFLSIK	18375650	2×TMT6plex [N-Term; K8]; 1×Phospho [S1(100)]	18375650 1×Phospho [S240(100)]	0.0191124	0.00119956	1	4	4	18375648; 18375650; 18375646; 5453992	18375650 [240-247]	0	1420.77	S1(Phospho): 100	0.32	0.73	2.62	0.92	0.86	0.9	0.3	0.61	2.41	0.93	0.88	0.76	3.32997	High	0.0002965	0.003158	22.66	High	0.001266	1	S1(Phospho): 100	S1;	18375650	NP_542416.1	LNKGLSKsMGFLSIK	Yes
AKT1S1	84335	proline-rich AKT1 substrate 1 isoform a [Homo sapiens]	S203	sLPVSVPVWGFK	400153980	2×TMT6plex [N-Term; K12]; 1×Phospho [S1(100)]	400153980 1×Phospho [S203(100)]	0.000163832	0.00012481	1	2	40	148806906; 400153980	400153980 [203-214]	0	1854.03	S1(Phospho): 100	0.23	1.49	2.03	0.85	0.22	1	0.27	1.56	1.85	0.82	0.28	1.06	4.73726	High	2.03e-05	9.17e-05	57.19	High	6.51e-05	1	S1(Phospho): 100	S1;	400153980	NP_115751.3	PTQQYAKsLPVSVPV	No
PKP2	5318	plakophilin-2 isoform 2b [Homo sapiens]	S135	GTAQYSSQKsVEER	148664226	2×TMT6plex [N-Term; K9]; 1×Phospho [S10(100)]	148664226 1×Phospho [S135(100)]	0.0189712	0.00117706	1	2	2	148664226; 148664186	148664226 [126-139]	1	2108.04	S10(Phospho): 99.99	0.36	0.34	0.73	2.24	0.85	0.55							2.20832	High	0.0008464	0.01398	14.78	High	0.0002911	1	S10(Phospho): 99.99	S10;	148664226	NP_004563.2	AQYSSQKsVEERSLR	Yes
EPHA2	1969	ephrin type-A receptor 2 precursor [Homo sapiens]	S910	TVsEWLESIK	32967311	2×TMT6plex [N-Term; K10]; 1×Phospho [S3(100)]	32967311 1×Phospho [S910(100)]	0.00622048	0.000503144	1	1	4	32967311	32967311 [908-917]	0	1729.92	S3(Phospho): 100	0.64	1.44	0.77	2.1	0.4	1.76	0.83	1.34	0.96	2.38	0.35	1.89	2.78938	High	0.0001288	0.001053	23.92	High	0.0003667	1	S3(Phospho): 100	S3;	32967311	NP_004422.2	GVPFRTVsEWLESIK	Yes
PDLIM5	10611	PDZ and LIM domain protein 5 isoform a [Homo sapiens]	S228	RGsQGDSK	374092020	2×TMT6plex [N-Term; K8]; 1×Phospho [S3(100)]	374092020 1×Phospho [S228(100)]	0.0143552	0.000870764	1	6	16	58533159; 374093201; 374093210; 374092020; 374093208; 374093212	374092020 [226-233]	1	1372.7	S3(Phospho): 100	0.43	0.75	0.81	4.28	1.28	1.73	0.45	0.84	0.84	3.74	1.43	1.62	4.4574	High	0.001161	0.02031	26.41	High	0.0003389	1	S3(Phospho): 100	S3;	374092020	NP_006448.4	AEGQRRGsQGDSKQQ	Yes
LIMA1	51474	LIM domain and actin-binding protein 1 isoform 1 [Homo sapiens]	S618	KGWsMSEQSEESVGGR	165905589	2×TMT6plex [N-Term; K]; 1×Oxidation [M5]; 1×Phospho [S4(100)]	165905589 1×Phospho [S618(100)]	0.00443284	0.000406702	1	4	4	165905589; 7705373; 165905591; 344313201	165905589 [615-630]	1	2308.07	S4(Phospho): 100	0.39	0.61	0.46	2.3	0.73	0.76	0.41	0.68	0.42	2.72	0.81	0.63	2.83336	High	0.0002091	0.002079	24.81	High	0.0001622	1	S4(Phospho): 100	S4;	165905589	NP_001107018.1	PPIRKGWsMSEQSEE	No
MYPN	84665	myopalladin isoform a [Homo sapiens]	S928	TPVDEsDDEIQHDEIPTGK	372220097	2×TMT6plex [N-Term; K19]; 1×Phospho [S6(100)]	372220097 1×Phospho [S928(100)]	6.04e-05	6.55e-05	1	2	15	372220099; 372220097	372220097 [923-941]	0	2663.25	S6(Phospho): 100	0.8	1.42	0.25	1.03	0.37	0.59	0.62	0.97	0.93	0.97	0.79	1.02	6.64284	High	1.3e-05	2.67e-05	44.32	High	5.72e-05	1	S6(Phospho): 100	S6;	372220097	NP_001243196.1	ERTPVDEsDDEIQHD	Yes
TRIM29	23650	tripartite motif-containing protein 29 [Homo sapiens]	S489	TSYQPSsPGR	17402909	1×TMT6plex [N-Term]; 1×Phospho [S7(99.1)]	17402909 1×Phospho [S489(99.1)]	0.0242823	0.00137655	1	1	10	17402909	17402909 [483-492]	0	1388.64	S7(Phospho): 99.13	0.65	0.67	0.57	1.12	3.24	0.47	0.37	0.46	0.38	1.06	3.32	0.4	2.31239	High	0.001458	0.02671	24.6	High	0.0004065	1	S7(Phospho): 99.13	S7;	17402909	NP_036233.2	RTSYQPSsPGRFTKE	Yes
C12orf45	121053	uncharacterized protein C12orf45 [Homo sapiens]	S15	ASPSCSsPTR	116256458	1×TMT6plex [N-Term]; 1×Carbamidomethyl [C5]; 1×Phospho [S7(99.2)]	116256458 1×Phospho [S15(99.2)]	0.0598885	0.00269966	1	1	23	116256458	116256458 [9-18]	0	1358.6	S7(Phospho): 99.18	0.78	1.4	0.46	1.02	0.84	0.43	0.61	1.35	0.38	1.16	0.99	0.32	2.86422	High	0.005689	0.1167	18.27	High	0.0006668	1	S7(Phospho): 99.18	S7;	116256458	NP_689531.2	KASPSCSsPTRDSSG	Yes
SH2D4A	63898	SH2 domain-containing protein 4A isoform a [Homo sapiens]	S261	RLsLGAQK	21361891	2×TMT6plex [N-Term; K8]; 1×Deamidated [Q7]; 1×Phospho [S3(100)]	21361891 1×Phospho [S261(100)]	0.0284715	0.00150426	1	2	2	21361891; 292658785	21361891 [259-266]	1	1411.81	S3(Phospho): 100	0.48	0.76	1.84	3.21	0.64	0.52							3.14534	High	0.0004809	0.006351	26.81	High	0.0003667	1	S3(Phospho): 100	S3;	21361891	NP_071354.2	REDYKRLsLGAQKGR	Yes
MICALL1	85377	MICAL-like protein 1 [Homo sapiens]	S484; S486	APsAsPLALHASR	31324577	1×TMT6plex [N-Term]; 2×Phospho [S3(100); S5(100)]	31324577 2×Phospho [S484(100); S486(100)]	0.000164274	0.00012481	1	1	4	31324577	31324577 [482-494]	0	1666.79	S3(Phospho): 100; S5(Phospho): 100	1.19	1.27	0.84	0.46	2.91	1.69	0.9	1.13	1.3	1	2.13	0.71	4.56699	High	2.03e-05	5.5e-05	42.17	High	7.11e-05	1	S3(Phospho): 100; S5(Phospho): 100	S3; S5;	31324577	NP_203744.1	RPAPRAPsASPLALH;APRAPSAsPLALHAS	Yes;Yes
MARCKS	4082	myristoylated alanine-rich C-kinase substrate [Homo sapiens]	S63	EELQANGsAPAADKEEPAAAGSGAASPSAAEK	153070260	3×TMT6plex [N-Term; K14; K32]; 1×Phospho [S8(100)]	153070260 1×Phospho [S63(100)]	0.00787956	0.000571669	1	1	6	153070260	153070260 [56-87]	1	3749.85	S8(Phospho): 99.99	1.45	3.49	1.46	1.55	1.8	1.59							2.69772	High	0.0001561	0.001316	8.43	High	0.0002254	1	S8(Phospho): 99.99	S8;	153070260	NP_002347.5	EELQANGsAPAADKE	Yes
ERMP1	79956	endoplasmic reticulum metallopeptidase 1 [Homo sapiens]	S53	sPGGSGGASR	55749804	1×TMT6plex [N-Term]; 1×Phospho [S1(100)]	55749804 1×Phospho [S53(100)]	0.00146393	0.000236062	1	1	16	55749804	55749804 [53-62]	0	1141.52	S1(Phospho): 100	1.25	0.34	0.95	0.95	3.01	0.73	1.13	0.32	0.57	0.48	1.69	0.28	3.14086	High	7.18e-05	0.0003155	18.95	High	0.0003814	1	S1(Phospho): 100	S1;	55749804	NP_079172.2	GGRTRKRsPGGSGGA	Yes
RASAL2	9462	ras GTPase-activating protein nGAP isoform 2 [Homo sapiens]	S164	sISGTSTSEKPNSMDTANTSPFK	226958575	3×TMT6plex [N-Term; K10; K23]; 1×Deamidated [N]; 1×Phospho [S1(100)]	226958575 1×Phospho [S164(100)]	0.000355912	0.000147488	1	2	3	226958575; 4758808	226958575 [164-186]	0	3155.54	S1(Phospho): 100	0.7	0.75	2.07	1.12	0.89	0.79	0.65	0.97	1.82	1.12	0.95	0.73	4.0749	High	2.62e-05	0.0001072	6.63	High	0.0001929	1	S1(Phospho): 100	S1;	226958575	NP_733793.2	ERSPRRRsISGTSTS	Yes
TRIM29	23650	tripartite motif-containing protein 29 [Homo sapiens]	S21	sPSGPSGSLENGTK	17402909	2×TMT6plex [N-Term; K14]; 1×Deamidated [N11]; 1×Phospho [S1(100)]	17402909 1×Phospho [S21(100)]	0.000177876	0.00012481	1	1	16	17402909	17402909 [21-34]	0	1856.9	S1(Phospho): 100	0.6	0.5	0.76	1.22	3.58	0.55	0.6	0.66	0.67	0.97	3.12	0.44	3.97285	High	2.03e-05	7.69e-05	61.5	High	5.72e-05	1	S1(Phospho): 100	S1;	17402909	NP_036233.2	PEARDARsPSGPSGS	Yes
SH3BP4	23677	SH3 domain-binding protein 4 [Homo sapiens]	S296	sCHDLDLLGQSPGWGQTQAVETNIVCK	7657562	2×TMT6plex [N-Term; K27]; 2×Carbamidomethyl [C2; C26]; 1×Phospho [S1(100)]	7657562 1×Phospho [S296(100)]	4.27e-05	6.55e-05	1	1	14	7657562	7657562 [296-322]	0	3551.71	S1(Phospho): 100	0.46	2.94	0.88	0.79	0.98	1.05	0.35	2.54	0.9	0.52	0.49	0.89	9.36261	High	0	8.12e-06	68.55	High	1.91e-05	1	S1(Phospho): 100	S1;	7657562	NP_055336.1	NHRKLARsCHDLDLL	Yes
KRT7	3855	keratin, type II cytoskeletal 7 [Homo sapiens]	S254	sLDLDGIIAEVK	67782365	2×TMT6plex [N-Term; K12]; 1×Phospho [S1(100)]	67782365 1×Phospho [S254(100)]	0.00026677	0.000147488	1	1	6	67782365	67782365 [254-265]	0	1811	S1(Phospho): 100		1.2		4.73	1.36	0.61	0.31	1.14	0.55	4.68	1.63	0.68	4.22432	High	2.03e-05	8.37e-05	30.6	High	0.0003667	1	S1(Phospho): 100	S1;	67782365	NP_005547.3	LSMDNSRsLDLDGII	Yes
TCEA1	6917	transcription elongation factor A protein 1 isoform 1 [Homo sapiens]	S100	KEPAITSQNsPEAR	5803191	2×TMT6plex [N-Term; K]; 1×Phospho [S10(100)]	5803191 1×Phospho [S100(100)]	0.000205397	0.00012481	1	2	11	45439355; 5803191	5803191 [91-104]	1	2066.07	S10(Phospho): 100	1.61	2.7	1.18	0.57	0.64	0.34	1.59	1.97	1.18	1.8	1.55	1.42	5.59251	High	2.03e-05	7.04e-05	39.52	High	8.36e-05	1	S10(Phospho): 100	S10;	5803191	NP_006747.1	PAITSQNsPEAREES	Yes
SNCG	6623	gamma-synuclein [Homo sapiens]	S124	EKEEVAEEAQsGGD	209693439	2×TMT6plex [N-Term; K2]; 1×Phospho [S11(100)]	209693439 1×Phospho [S124(100)]	0.00191637	0.000261096	1	1	4	209693439	209693439 [114-127]	1	2015.92	S11(Phospho): 100	0.68	0.72	0.56	1.04	5.43	0.62	0.87	0.97	0.72	1.24	4.72	0.68	2.52951	High	0.0003287	0.003763	44.01	High	0.0001196	1	S11(Phospho): 100	S11;	209693439	NP_003078.2	EVAEEAQsGGD_	Yes
ANK3	288	ankyrin-3 isoform 1 [Homo sapiens]	S847	MNVPETMNEVLDMsDDEVRK	32967601	2×TMT6plex [N-Term; K20]; 1×Phospho [S14(100)]	32967601 1×Phospho [S847(100)]	0.00838216	0.000620563	1	3	4	325053668; 32967601; 325053666	32967601 [834-853]	1	2890.34	S14(Phospho): 100	0.89	0.86	0.83	1.43	2.01	0.46	0.76	1.18	0.77	1.43	2.21	0.84	4.2855	High	0.0001644	0.001397	23.39	High	0.0002679	1	S14(Phospho): 100	S14;	32967601	NP_066267.2	MNEVLDMsDDEVRKA	Yes
SOX15	6665	protein SOX-15 [Homo sapiens]	S215	LQGELLPTYTHYLPPGsPTPYNPPLAGAPMPLTHL	5902106	1×TMT6plex [N-Term]; 1×Deamidated [Q/N]; 1×Phospho [S17(85)]	5902106 1×Phospho [S215(85)]	0.00651827	0.000523051	1	1	5	5902106	5902106 [199-233]	0	4064.05	S17(Phospho): 85.02	0.37	2.06	1.68	1.23	0.64	1.25							3.00572	High	0.0002163	0.002234	2.05	High	0.0001716	1	S17(Phospho): 85.02	S17;	5902106	NP_008873.1	THYLPPGsPTPYNPP	No
KMT2D	8085	histone-lysine N-methyltransferase 2D [Homo sapiens]	S4359	VsPAAAQLADTLFSK	148762969	2×TMT6plex [N-Term; K15]; 1×Phospho [S2(100)]	148762969 1×Phospho [S4359(100)]	7.67e-05	9e-05	1	1	4	148762969	148762969 [4358-4372]	0	2057.11	S2(Phospho): 100	1.31	0.51	1.06	0.83	2.47	0.85	2.01	1.01	1.54	1.96	3.93	1.28	4.77539	High	2.03e-05	3.19e-05	34.42	High	7.92e-05	1	S2(Phospho): 100	S2;	148762969	NP_003473.3	EPPPGRVsPAAAQLA	Yes
RTN4	57142	reticulon-4 isoform B [Homo sapiens]	S181	GsSGSVVVDLLYWR	24431933	1×TMT6plex [N-Term]; 1×Phospho [S2(100)]	24431933 1×Phospho [S181(100)]	7.12e-05	9e-05	1	1	13	24431933	24431933 [180-193]	0	1846.93	S2(Phospho): 100	0.63	0.83	1.63	1.95	1.14	2.04				1.8		1.58	5.19905	High	2.03e-05	3.03e-05	52.78	High	3.2e-05	1	S2(Phospho): 100	S2;	24431933	NP_722550.1	AAPKRRGsSGSVVVD	Yes
CTNND1	1500	catenin delta-1 isoform 1ABC [Homo sapiens]	S346; S349	GsLAsLDSLR	146231940	1×TMT6plex [N-Term]; 2×Phospho [S2(100); S5(100)]	146231940 2×Phospho [S346(100); S349(100)]	0.00504063	0.000429788	1	15	8	332688212; 146231962; 146231970; 332688216; 146231940; 332688210; 332688208; 332634644; 146231991; 146231977; 332688214; 146231938; 10835010; 146231946; 332688220	146231940 [345-354]	0	1407.65	S2(Phospho): 100; S5(Phospho): 100	0.44	0.74	0.65	1.4	2.52	0.71	1.47	1.31	1.18	2.19	4.47	1.4	3.71989	High	0.0001218	0.0008725	28.28	High	0.000317	1	S2(Phospho): 100; S5(Phospho): 100	S2; S5;	146231940	NP_001078927.1	LAQHERGsLASLDSL;HERGSLAsLDSLRKG	Yes;Yes
FERMT1	55612	fermitin family homolog 1 [Homo sapiens]	S179	EPIIEDILNLESSPTASGSSVsPGLYSK	116686114	2×TMT6plex [N-Term; K28]; 1×Phospho [S22(100)]	116686114 1×Phospho [S179(100)]	4.28e-05	6.55e-05	1	1	47	116686114	116686114 [158-185]	0	3428.75	S22(Phospho): 100	0.71	0.75	0.67	1.5	2.59	0.81	0.68	0.84	0.69	1.49	2.6	0.73	7.78072	High	0	1.64e-05	67.92	High	1.91e-05	1	S22(Phospho): 100	S22;	116686114	NP_060141.3	TASGSSVsPGLYSKT	Yes
GPSM2	29899	G-protein-signaling modulator 2 [Homo sapiens]	S483	KIsADTIGDEGFFDLLSR	164519122	2×TMT6plex [N-Term; K]; 1×Phospho [S3(100)]	164519122 1×Phospho [S483(100)]	0.000345848	0.000147488	1	1	4	164519122	164519122 [481-498]	1	2522.29	S3(Phospho): 100	1.16	0.88	1.89	0.87	3.79	1.34	1.25	1.15	1.89	1.07	3.62	1.41	5.12649	High	2.62e-05	0.0001046	39.75	High	8.36e-05	1	S3(Phospho): 100	S3;	164519122	NP_037428.3	PNSQRKIsADTIGDE	Yes
NF2	4771	merlin isoform 1 [Homo sapiens]	S518	RLsMEIEK	4557795	2×TMT6plex [N-Term; K8]; 1×Phospho [S3(100)]	4557795 1×Phospho [S518(100)]	0.11715	0.00577002	1	5	9	32967260; 4557795; 32967264; 32451486; 32967262	4557795 [516-523]	1	1543.83	S3(Phospho): 100	0.83	0.27	3.92	1.02	0.95	1.65	0.94	0.26	4.14	1.24	1.18	1.88	3.98529	High	0.00162	0.02996	23.37	High	0.005064	1	S3(Phospho): 100	S3;	4557795	NP_000259.1	DTDMKRLsMEIEKEK	Yes
MYL12A	10627	myosin regulatory light chain 12A isoform 2 [Homo sapiens]	S25	ATsNVFAMFDQSQIQEFK	740087210	2×TMT6plex [N-Term; K18]; 1×Oxidation [M8]; 1×Phospho [T/S]		4.27e-05	6.55e-05	1	5	160	29568111; 222144324; 740087210; 5453740; 31563524	740087210 [23-40]	0	2645.27	S3(Phospho): 99.3	0.47	2.16	1.11	1.15	0.57	1.08	0.31	2.21	1.19	1.24	0.52	1.01	7.8568	High	1.3e-05	2.78e-05	59.65	High	1.91e-05	1	S3(Phospho): 99.3	S3;	740087210	NP_001289978.1	KRPQRATsNVFAMFD	No
ATL1	51062	atlastin-1 isoform a [Homo sapiens]	S10	DRNsWGGFSEK	19923445	2×TMT6plex [N-Term; K11]; 1×Phospho [S4(100)]	19923445 1×Phospho [S10(100)]	0.00400659	0.000383028	1	2	2	19923445; 74024917	19923445 [7-17]	1	1820.87	S4(Phospho): 100	0.93	2.37	0.57	1.77	0.55	0.48							3.49165	High	0.0001561	0.001346	16.51	High	0.0001545	1	S4(Phospho): 100	S4;	19923445	NP_056999.2	KNRRDRNsWGGFSEK	Yes
TRA2B	6434	transformer-2 protein homolog beta isoform 1 [Homo sapiens]	S99	HSHSHsPMSTR	4759098	1×TMT6plex [N-Term]; 1×Oxidation [M8]; 1×Phospho [S6(98.9)]	4759098 1×Phospho [S99(98.9)]	0.0013824	0.000236062	1	1	4	4759098	4759098 [94-104]	0	1588.69	S6(Phospho): 100	4.38	0.86	1.11	0.27	1.22	0.62	6.99	2.82	2	1.33	1.91	1.86	3.33429	High	0.0001218	0.0006588	25.77	High	9.32e-05	1	S6(Phospho): 100	S6;	4759098	NP_004584.1	RRHSHSHsPMSTRRR	Yes
BNIP3	664	BCL2/adenovirus E1B 19 kDa protein-interacting protein 3 [Homo sapiens]	S131	SSHCDsPPR	734703979	1×TMT6plex [N-Term]; 1×Carbamidomethyl [C4]; 1×Phospho [S6(100)]	734703979 1×Phospho [S131(100)]	0.0733464	0.00339512	1	1	4	734703979	734703979 [126-134]	0	1351.57	S6(Phospho): 100	0.96	3	0.81	0.71	0.38	0.67	1.45	5.04	1.16	1.14	0.55	0.89	2.65283	High	0.000808	0.01311	21.72	High	0.0008575	1	S6(Phospho): 100	S6;	734703979	NP_004043.3	SKSSHCDsPPRSQTP	No
FRMD6	122786	FERM domain-containing protein 6 isoform 2 [Homo sapiens]	S375	ASGSSAGsMK	388490221	2×TMT6plex [N-Term; K10]; 1×Phospho [S8(100)]	388490221 1×Phospho [S375(100)]	0.00291511	0.00036439	1	3	4	109715866; 388490221; 388490223	388490221 [368-377]	0	1420.69	S8(Phospho): 100	0.45	1.03	0.83	2.46	0.65	1.1	0.34	0.92	0.62	2.41	0.54	0.93	3.49485	High	0.0003931	0.005098	39.03	High	0.0001349	1	S8(Phospho): 100	S8;	388490221	NP_001253975.1	ASGSSAGsMKHKRLS	No
HNRNPL	3191	heterogeneous nuclear ribonucleoprotein L isoform a [Homo sapiens]	Y92	TDNAGDQHGGGGGGGGGAGAAGGGGGGENyDDPHK	52632383	2×TMT6plex [N-Term; K35]; 1×Deamidated [N/Q]; 1×Phospho [Y30(100)]	52632383 1×Phospho [Y92(100)]	6.63e-05	6.55e-05	1	1	3	52632383	52632383 [63-97]	0	3520.48	Y30(Phospho): 100	0.83	0.43	1.89	1.97	2.52	1.82							4.53832	High	1.3e-05	2.87e-05	26.08	High	2.27e-05	1	Y30(Phospho): 100	Y30;	52632383	NP_001524.2	GGGGGENyDDPHKTP	Yes
NPM1	4869	nucleophosmin isoform 1 [Homo sapiens]	S143	sAPGGGSK	10835063	2×TMT6plex [N-Term; K8]; 1×Phospho [S1(100)]	10835063 1×Phospho [S143(100)]	0.180763	0.0096581	1	3	2	40353734; 83641870; 10835063	10835063 [143-150]	0	1198.62	S1(Phospho): 100	1.55	1.65	1.57	0.95	1.41	1.16							2.28732	High	0.002001	0.03743	10.37	High	0.008441	1	S1(Phospho): 100	S1;	10835063	NP_002511.1	LSISGKRsAPGGGSK	Yes
MKI67	4288	antigen KI-67 isoform 1 [Homo sapiens]	S538; T543	sLVMHtPPVLK	103472005	2×TMT6plex [N-Term; K11]; 2×Phospho [S1(100); T6(100)]	103472005 2×Phospho [S538(100); T543(100)]	0.00756311	0.000546498	1	2	4	103472005; 225543215	103472005 [538-548]	0	1839.96	S1(Phospho): 100; T6(Phospho): 100	0.54	1.28	1.68	0.83	1.69	1.12	1.82	2.01	3.01	2.02	2.49	2.28	4.18682	High	0.0001644	0.001399	8.59	High	0.0005165	1	S1(Phospho): 100; T6(Phospho): 100	S1; T6;	103472005	NP_002408.3	EAPTKRKsLVMHTPP;RKSLVMHtPPVLKKI	Yes;Yes
SRGAP2	23380	SLIT-ROBO Rho GTPase-activating protein 2 isoform a [Homo sapiens]	S206	sPDSTANVR	112363100	1×TMT6plex [N-Term]; 1×Phospho [S1(100)]	112363100 1×Phospho [S206(100)]	0.0627609	0.00285195	1	4	4	112363100; 665821323; 282165721; 428229676	112363100 [206-214]	0	1255.59	S1(Phospho): 99.99	2.05	1.84	1.53	1.02	1.17	1.56	2.17	1.92	2.26	1.24	1.4	2.18	2.32833	High	0.000781	0.01228	14.15	High	0.004115	1	S1(Phospho): 99.99	S1;	112363100	NP_056141.2	EDRQTPRsPDSTANV	Yes
MIOS	54468	WD repeat-containing protein mio [Homo sapiens]	S766	GFSQYGVSGsPTK	109150419	2×TMT6plex [N-Term; K13]; 1×Phospho [S10(100)]	109150419 1×Phospho [S766(100)]	8e-05	9e-05	1	1	10	109150419	109150419 [757-769]	0	1852.92	S10(Phospho): 100	1.99	1.68	2.15	1.6	1.9	1.38	1.64	1.42	2.03	1.44	1.71	1.49	5.65982	High	2.03e-05	3.28e-05	47.63	High	7.11e-05	1	S10(Phospho): 100	S10;	109150419	NP_061878.3	SQYGVSGsPTKSKVT	Yes
LIG1	3978	DNA ligase 1 isoform 1 [Homo sapiens]	S141	TIQEVLEEQsEDEDREAK	4557719	2×TMT6plex [N-Term; K18]; 2×Deamidated [Q3; Q9]; 1×Phospho [S10(100)]	4557719 1×Phospho [S141(100)]	0.00024151	0.000147488	1	2	2	574274721; 4557719	4557719 [132-149]	1	2688.25	S10(Phospho): 100	1.76	1.48	2.37	1.47	1.57	1.87							4.13508	High	3.79e-05	0.0001201	47.57	High	6.51e-05	1	S10(Phospho): 100	S10;	4557719	NP_000225.1	QEVLEEQsEDEDREA	Yes
KCNMA1	3778	calcium-activated potassium channel subunit alpha-1 isoform d [Homo sapiens]	S707	RLEDEQPSTLsPK	238624132	2×TMT6plex [N-Term; K13]; 1×Phospho [S11(100)]	238624132 1×Phospho [S707(100)]	0.000217427	0.000147488	1	4	3	408358005; 62388890; 238624132; 26638650	238624132 [697-709]	1	2038.06	S11(Phospho): 100	7.03	1.51	1.2	0.87	1.2	1.13							5.68186	High	2.03e-05	6.99e-05	21.89	High	8.36e-05	1	S11(Phospho): 100	S11;	238624132	NP_001154825.1	DEQPSTLsPKKKQRN	Yes
LIG1	3978	DNA ligase 1 isoform 1 [Homo sapiens]	S51	EWNGVVSESDsPVK	4557719	2×TMT6plex [N-Term; K14]; 1×Deamidated [N3]; 1×Phospho [S11(100)]	4557719 1×Phospho [S51(100)]	9.02e-05	9e-05	1	3	24	574274721; 574274815; 4557719	4557719 [41-54]	0	2072	S11(Phospho): 100	2.18	1.26	1.93	1.07	1.36	1.28	2.92	1.91	2.97	1.58	2	2.08	5.59098	High	2.03e-05	4.23e-05	51.92	High	2.27e-05	1	S11(Phospho): 100	S11;	4557719	NP_000225.1	GVVSESDsPVKRPGR	Yes
BRPF1	7862	peregrin isoform 1 [Homo sapiens]	S932	ESQMTPSHGGsPVGPPQLPIMSSLR	51173720	1×TMT6plex [N-Term]; 1×Phospho [S11(100)]	51173720 1×Phospho [S932(100)]	9.36e-05	9e-05	1	2	5	51173720; 51173722	51173720 [922-946]	0	2899.4	S11(Phospho): 100	1.53	1.94	1.56	1.85	1.64	1.68	1.37	1.34	1.47	1.49	1.12	1.02	5.20645	High	2.03e-05	3.63e-05	28.92	High	7.92e-05	1	S11(Phospho): 100	S11;	51173720	NP_001003694.1	MTPSHGGsPVGPPQL	No
EGLN1	54583	egl nine homolog 1 [Homo sapiens]	S125	AKPPADPAAAAsPCR	13489073	2×TMT6plex [N-Term; K2]; 1×Carbamidomethyl [C14]; 1×Phospho [S12(100)]	13489073 1×Phospho [S125(100)]	0.000545437	0.000193352	1	1	9	13489073	13489073 [114-128]	0	2018.03	S12(Phospho): 100	1.55	2.83	1.53	1.65	1.13	1.77	1.22	2.62	1.3	1.15	0.57	0.59	3.99054	High	5.25e-05	0.0001497	29.85	High	0.0001301	1	S12(Phospho): 100	S12;	13489073	NP_071334.1	ADPAAAAsPCRAAAG	Yes
WDHD1	11169	WD repeat and HMG-box DNA-binding protein 1 isoform 1 [Homo sapiens]	S333	DYNDLFDGDDMsNAGDFLNDNAVEIPSFSK	5901892	2×TMT6plex [N-Term; K30]; 1×Deamidated [N]; 1×Phospho [S12(100)]	5901892 1×Phospho [S333(100)]	0.00279637	0.00036439	1	2	20	56550086; 5901892	5901892 [322-351]	0	3864.69	S12(Phospho): 100	1.46	1.18	2.2	1.72	1.43	1.66	1.56	1.5	2.51	1.4	1.46	1.34	3.18168	High	0.0001151	0.0005275	7.69	High	0.0001961	1	S12(Phospho): 100	S12;	5901892	NP_009017.1	LFDGDDMsNAGDFLN	Yes
SLAIN2	57606	SLAIN motif-containing protein 2 [Homo sapiens]	S63	AGASIPSSGAAsPR	149588928	1×TMT6plex [N-Term]; 1×Phospho [S12(100)]	149588928 1×Phospho [S63(100)]	0.000679698	0.000193352	1	1	6	149588928	149588928 [52-65]	0	1537.76	S12(Phospho): 100	1.43	2.38	1.27	0.85	1.72	1.41	1.31	1.26	0.67	0.44	0.73	0.54	4.57827	High	7.41e-05	0.0003526	61.18	High	8.27e-05	1	S12(Phospho): 100	S12;	149588928	NP_065897.1	IPSSGAAsPRGFPLG	Yes
POU2F1	5451	POU domain, class 2, transcription factor 1 isoform 1 [Homo sapiens]	S471	INPPSSGGTSSsPIK	311771665	2×TMT6plex [N-Term; K15]; 1×Phospho [S12(100)]	311771665 1×Phospho [S471(100)]	9.01e-05	9e-05	1	3	39	311771665; 311771667; 311771673	311771665 [460-474]	0	1967.03	S12(Phospho): 100	1.39	1.2	1.55	1.51	2.94	1.43	1.23	1.28	1.2	1.19	1.89	1.19	6.01419	High	2.03e-05	4.2e-05	55.57	High	2.27e-05	1	S12(Phospho): 100	S12;	311771665	NP_002688.3	SSGGTSSsPIKAIFP	No
PPP1R12B	4660	protein phosphatase 1 regulatory subunit 12B isoform a [Homo sapiens]	S687	EKPTDTEGLEGsPEKHEPSAVPATEAGEGQQPWGR	268607506	3×TMT6plex [N-Term; K2; K15]; 1×Deamidated [Q]; 1×Phospho [S12(100)]	268607506 1×Phospho [S687(100)]	7.74e-05	9e-05	1	1	4	268607506	268607506 [676-710]	1	4470.17	S12(Phospho): 100	1.36	1.53	1.43	1.99	1.83	1.05							8.09441	High	2.03e-05	3.21e-05	8.73	High	8.27e-05	1	S12(Phospho): 100	S12;	268607506	NP_002472.2	DTEGLEGsPEKHEPS	Yes
SGOL1	151648	shugoshin-like 1 isoform EF [Homo sapiens]	S507	GDPFTDLCFLNsPIFK	312922335	2×TMT6plex [N-Term; K16]; 1×Carbamidomethyl [C8]; 1×Phospho [S12(100)]	312922335 1×Phospho [S507(100)]	0.00687832	0.000523051	1	6	2	312922343; 312922333; 312922335; 312922341; 312922339; 312922337	312922335 [496-511]	0	2409.2	S12(Phospho): 100	1.16	1.33	2.3	1.13	1.32	1.53							3.32739	High	0.0001488	0.001161	15.03	High	0.0004087	1	S12(Phospho): 100	S12;	312922335	NP_001186181.1	TDLCFLNsPIFKQKK	Yes
CD3EAP	10849	DNA-directed RNA polymerase I subunit RPA34 isoform 1 [Homo sapiens]	S130; S138	ILEGPQQSLSGsPLQPIPAsPPPQIPPGLRPR	662236821	1×TMT6plex [N-Term]; 1×Deamidated [Q]; 2×Phospho [S12(97.8); S20(100)]	662236821 2×Phospho [S130(97.8); S138(100)]	4.39e-05	6.55e-05	1	2	7	6912246; 662236821	662236821 [119-150]	0	3714.92	S12(Phospho): 97.84; S20(Phospho): 100	2.28	2	1.53	0.98	1.22	1.61	0.83	0.91	0.72	0.66	0.61	0.75	6.52919	High	1.3e-05	1.86e-05	25.98	High	8.36e-05	1	S12(Phospho): 97.84; S20(Phospho): 100	S12; S20;	662236821	NP_001284519.1	PQQSLSGsPLQPIPA;PLQPIPAsPPPQIPP	No;No
ANLN	54443	actin-binding protein anillin isoform 1 [Homo sapiens]	S54	QPLSEASNQQPLsGGEEK	31657094	2×TMT6plex [N-Term; K18]; 1×Phospho [S13(100)]	31657094 1×Phospho [S54(100)]	7.26e-05	9e-05	1	3	8	546231404; 31657094; 546231137	31657094 [42-59]	0	2437.2	S13(Phospho): 100	2.3	1.62	1.29	1.42	1.78	1.03	1.3	1.16	1.01	1.01	0.95	0.96	4.37343	High	2.03e-05	3.76e-05	39.81	High	6.51e-05	1	S13(Phospho): 100	S13;	31657094	NP_061155.2	ASNQQPLsGGEEKSC	Yes
ABCF1	23	ATP-binding cassette sub-family F member 1 isoform a [Homo sapiens]	S140	GGNVFAALIQDQsEEEEEEEKHPPKPAKPEK	69354671	5×TMT6plex [N-Term; K21; K25; K28; K31]; 3×Deamidated [N3; Q10; Q12]; 1×Phospho [S13(100)]	69354671 1×Phospho [S140(100)]	0.00300353	0.00036439	1	2	1	10947135; 69354671	69354671 [128-158]	1	4689.42	S13(Phospho): 100	1.69	2.37	1.07	1.51	1.35	1.58							5.25425	High	0.0001218	0.000561					S13(Phospho): 100	S13;	69354671	NP_001020262.1	AALIQDQsEEEEEEE	Yes
CDCA5	113130	sororin [Homo sapiens]	S75	IVAHAVEVPAVQsPR	18087845	1×TMT6plex [N-Term]; 1×Phospho [S13(100)]	18087845 1×Phospho [S75(100)]	7.73e-05	9e-05	1	1	6	18087845	18087845 [63-77]	0	1882.01	S13(Phospho): 100	1.56	2.12	1.96	1.75	1.11	1.86	1.32	1.13	1.25	0.91	1.08	0.84	4.19358	High	2.03e-05	7.59e-05	30.91	High	2.27e-05	1	S13(Phospho): 100	S13;	18087845	NP_542399.1	VEVPAVQsPRRSPRI	Yes
PRKAR1B	5575	cAMP-dependent protein kinase type I-beta regulatory subunit [Homo sapiens]	S83	SNSQSDSHDEEVsPTPPNPVVK	38257139	2×TMT6plex [N-Term; K22]; 1×Phospho [S13(100)]	38257139 1×Phospho [S83(100)]	4.27e-05	6.55e-05	1	1	7	38257139	38257139 [71-92]	0	2888.37	S13(Phospho): 100	1.43	1.71	1.26	1.47	2.13	1.54	0.67	1.21	0.69	0.95	0.89	1.06	6.36008	High	0	1.56e-05	42.18	High	1.91e-05	1	S13(Phospho): 100	S13;	38257139	NP_002726.1	DSHDEEVsPTPPNPV	Yes
HTT	3064	huntingtin [Homo sapiens]	S1201	EKEPGEQASVPLsPK	90903231	3×TMT6plex [N-Term; K2; K15]; 1×Phospho [S13(100)]	90903231 1×Phospho [S1201(100)]	9.06e-05	9e-05	1	1	4	90903231	90903231 [1189-1203]	1	2363.28	S13(Phospho): 100	1.36	2.05	1.41	1.24	1.67	1.48	1.46	2.08	1.33	1.18	1.21	1.58	5.43489	High	2.03e-05	3.56e-05	19.94	High	6.51e-05	1	S13(Phospho): 100	S13;	90903231	NP_002102.4	EQASVPLsPKKGSEA	No
RREB1	6239	ras-responsive element-binding protein 1 isoform 1 [Homo sapiens]	S1534	LAEETEGPSDGEsAAEK	51173737	2×TMT6plex [N-Term; K17]; 1×Phospho [S13(98.6)]	51173737 1×Phospho [S1534(98.6)]	0.000769617	0.000193352	1	2	2	51173737; 51173735	51173737 [1522-1538]	0	2258.05	S13(Phospho): 98.61	1.77	1.75	1.53	1.95	1.35	1.14							3.60496	High	5.93e-05	0.0001932	17.54	High	0.0001264	1	S13(Phospho): 98.61	S13;	51173737	NP_001003699.1	EGPSDGEsAAEKRSS	No
MEAF6	64769	chromatin modification-related protein MEAF6 isoform 1 [Homo sapiens]	S167	AASSTSSGSHHSsHK	40255020	2×TMT6plex [N-Term; K15]; 1×Phospho [S/T]		0.000101255	9e-05	1	3	24	40255020; 400153668; 400153656	40255020 [155-169]	0	2005.95	S13(Phospho): 99.99	0.9	1.2	1.59	1.48	2.73	1.63	1.59	1.94	2.49	1.39	2.8	2.07	6.49801	High	2.03e-05	3.83e-05	26.52	High	3.2e-05	1	S13(Phospho): 99.99	S13;	40255020	NP_073593.2	SSGSHHSsHKKRKNK	Yes
CDCA2	157313	cell division cycle-associated protein 2 [Homo sapiens]	S936	TICTFDSSGFESMsPIK	44681484	2×TMT6plex [N-Term; K17]; 1×Carbamidomethyl [C3]; 1×Phospho [S14(100)]	44681484 1×Phospho [S936(100)]	0.00177457	0.000236062	1	1	2	44681484	44681484 [923-939]	0	2445.15	S14(Phospho): 100	2.28	1.43	1.97	1.22	1.1	1.99							2.94019	High	7.41e-05	0.0003668	29.54	High	0.0001662	1	S14(Phospho): 100	S14;	44681484	NP_689775.2	SSGFESMsPIKETVS	Yes
JPH2	57158	junctophilin-2 isoform 1 [Homo sapiens]	S469	GAGAAGLPQPPREsPQLHER	21704281	1×TMT6plex [N-Term]; 1×Phospho [S14(100)]	21704281 1×Phospho [S469(100)]	0.000527907	0.000193352	1	1	3	21704281	21704281 [456-475]	1	2377.2	S14(Phospho): 100	1.63	1.88	1.17	1.68	1.29	1.62							4.31456	High	5.25e-05	0.0001459	11.75	High	0.0001165	1	S14(Phospho): 100	S14;	21704281	NP_065166.2	LPQPPREsPQLHERE	Yes
RALGPS2	55103	ras-specific guanine nucleotide-releasing factor RalGPS2 isoform 1 [Homo sapiens]	S329	SVAAEGALLPQTPPsPR	32441283	1×TMT6plex [N-Term]; 1×Phospho [S15(100)]	32441283 1×Phospho [S329(100)]	0.000168789	0.00012481	1	2	2	32441283; 555943905	32441283 [315-331]	0	2000.04	S15(Phospho): 100	1.86	2.23	1.31	1.99	1.24	1.61							4.51196	High	2.03e-05	5.62e-05	23.5	High	7.11e-05	1	S15(Phospho): 100	S15;	32441283	NP_689876.2	LLPQTPPsPRNLIPH	Yes
TNC	3371	tenascin precursor [Homo sapiens]	S72	LPVGSQCSVDLESAsGEK	153946395	2×TMT6plex [N-Term; K18]; 1×Carbamidomethyl [C7]; 1×Phospho [S15(100)]	153946395 1×Phospho [S72(100)]	9.16e-05	9e-05	1	1	2	153946395	153946395 [58-75]	0	2401.17	S15(Phospho): 100	1.71	2.41	0.79	0.7	1.26	1.1							5.56179	High	2.03e-05	3.58e-05	58.46	High	2.27e-05	1	S15(Phospho): 100	S15;	153946395	NP_002151.2	SVDLESAsGEKDLAP	Yes
ARHGEF16	27237	rho guanine nucleotide exchange factor 16 [Homo sapiens]	S174	GLGKPGGQGDAIQLsPK	163792208	3×TMT6plex [N-Term; K4; K17]; 1×Phospho [S15(100)]	163792208 1×Phospho [S174(100)]	0.00513974	0.000429788	1	1	4	163792208	163792208 [160-176]	0	2390.34	S15(Phospho): 100	1.16	1.05	1.42	1.28	2.02	1.23	1.64	1.03	2.17	2	2.95	1.83	3.48307	High	0.0001764	0.001472	23.02	High	0.0003556	1	S15(Phospho): 100	S15;	163792208	NP_055263.2	QGDAIQLsPKLQALA	Yes
CSNK2B	1460	casein kinase II subunit beta isoform 1 [Homo sapiens]	S209	IHPMAYQLQLQAASNFKsPVK	23503295	3×TMT6plex [N-Term; K17; K21]; 1×Oxidation [M4]; 1×Phospho [S18(98.4)]	23503295 1×Phospho [S209(98.4)]	0.00284655	0.00036439	1	2	2	23503295; 538260597	23503295 [192-212]	1	3154.71	S18(Phospho): 98.4	1.9	1.93	1.85	1.35	1.45	2.07							4.21947	High	0.0001218	0.0005357	9.57	High	0.0003348	1	S18(Phospho): 98.4	S18;	23503295	NP_001311.3	QAASNFKsPVKTIR_	Yes
CCDC59	29080	thyroid transcription factor 1-associated protein 26 [Homo sapiens]	S129	KVDHPLSEQVHQPLLEEQCsIDEPLFEDQCSFDQPQPEEQCIK	156142178	3×TMT6plex [N-Term; K43; K]; 3×Carbamidomethyl [C19; C30; C41]; 1×Phospho [S20(96.8)]	156142178 1×Phospho [S129(96.8)]	0.000102717	9e-05	1	1	3	156142178	156142178 [110-152]	1	5973.83	S20(Phospho): 96.84	1.36	2.2	1.12	1.17	1.71	1.64							6.25611	High	2.03e-05	3.86e-05	9.17	High	0.0001196	1	S20(Phospho): 96.84	S20;	156142178	NP_054886.2	PLLEEQCsIDEPLFE	No
CDC42EP4	23580	cdc42 effector protein 4 [Homo sapiens]	S292	AGPDLPSLPSHALEDEGWAAAAPsPGSAR	13786127	1×TMT6plex [N-Term]; 1×Phospho [S24(100)]	13786127 1×Phospho [S292(100)]	4.27e-05	0	1	1	15	13786127	13786127 [269-297]	0	3136.49	S24(Phospho): 100	1.38	1.86	0.95	1.35	2.18	1.35	1.33	1.51	1.08	1.48	1.54	1.29	8.88643	High	0	5.19e-06	80.65	High	1.91e-05	1	S24(Phospho): 100	S24;	13786127	NP_036253.2	GWAAAAPsPGSARSM	Yes
SAAL1	113174	protein SAAL1 [Homo sapiens]	S6	NPsPPPPGR	116235444	1×TMT6plex [N-Term]; 1×Phospho [S3(100)]	116235444 1×Phospho [S6(100)]	0.0428202	0.00212175	1	1	11	116235444	116235444 [4-12]	0	1227.61	S3(Phospho): 100	2.37	1.68	0.79	1.28	1.75	0.6	2.04	1.71	0.72	0.99	1.35	0.38	2.49926	High	0.0005424	0.007276	15.34	High	0.002363	1	S3(Phospho): 100	S3;	116235444	NP_612430.2	_MDRNPsPPPPGRD	Yes
RAVER1	125950	ribonucleoprotein PTB-binding 1 [Homo sapiens]	S584	LLsPLSSAR	123173757	1×TMT6plex [N-Term]; 1×Phospho [S3(100)]	123173757 1×Phospho [S584(100)]	0.0762524	0.0035909	1	1	5	123173757	123173757 [582-590]	0	1252.69	S3(Phospho): 100	1.6	1.75	1.84	1.3	1.5	1.8							3.09726	High	0.003203	0.06302	24.12	High	0.0009664	1	S3(Phospho): 100	S3;	123173757	NP_597709.2	QLKSRLLsPLSSARL	No
TJP1	7082	tight junction protein ZO-1 isoform d [Homo sapiens]	S916	IDsPGFKPASQQVYR	666335594	2×TMT6plex [N-Term; K7]; 1×Phospho [S3(100)]	666335594 1×Phospho [S916(100)]	0.00148717	0.000236062	1	2	5	116875765; 666335594	666335594 [914-928]	0	2231.16	S3(Phospho): 100	1.26	1.12	3.86	1.41	1.27	1.19	1.24	1.13	3.41	1.04	0.96	0.72	4.19395	High	7.18e-05	0.0003198	3.15	High	0.0002254	1	S3(Phospho): 100	S3;	666335594	NP_001287955.1	QPIHRIDsPGFKPAS	No
CEP350	9857	centrosome-associated protein 350 [Homo sapiens]	S1805	LDsHSDDDTKDNK	171184451	3×TMT6plex [N-Term; K10; K13]; 1×Phospho [S3(99)]	171184451 1×Phospho [S1805(99)]	0.171916	0.00898246	1	1	3	171184451	171184451 [1803-1815]	1	2257.1	S3(Phospho): 98.96	1.97	1.38	1.73	1.25	1.88	2.05							1.89609	High	0.002004	0.03763	2.49	High	0.003893	1	S3(Phospho): 98.96	S3;	171184451	NP_055625.4	AGESKLDsHSDDDTK	Yes
WDR62	284403	WD repeat-containing protein 62 isoform 1 [Homo sapiens]	S1233	SIsLGDSEGPIVATLAQPLR	145580608	1×TMT6plex [N-Term]; 1×Phospho [S3(99.2)]	145580608 1×Phospho [S1233(99.2)]	4.33e-05	6.55e-05	1	2	26	145580608; 145580610	145580608 [1231-1250]	0	2333.23	S3(Phospho): 99.14	1.9	1.72	2.54	1.65	1.35	1.77	1.47	1.19	1.94	1.1	1.31	1.24	7.3193	High	0	1.79e-05	66.47	High	2.27e-05	1	S3(Phospho): 99.14	S3;	145580608	NP_001077430.1	ARISRSIsLGDSEGP	No
GPRIN1	114787	G protein-regulated inducer of neurite outgrowth 1 [Homo sapiens]	S75	SPsGAGEGASCSDGPR	112821681	1×TMT6plex [N-Term]; 1×Carbamidomethyl [C11]; 1×Phospho [S3(100)]	112821681 1×Phospho [S75(100)]	0.00873691	0.00064256	1	1	5	112821681	112821681 [73-88]	0	1800.74	S3(Phospho): 99.98	1.72	1.41	2.18	1.2	1.17	1.4	1.7	1.31	1.45	1.48	1.04	1.95	2.41802	High	0.0001764	0.001458	27.67	High	0.0001895	1	S3(Phospho): 99.98	S3;	112821681	NP_443131.2	ESRHRSPsGAGEGAS	Yes
NUP214	8021	nuclear pore complex protein Nup214 [Homo sapiens]	S1023	TPsIQPSLLPHAAPFAK	33946327	2×TMT6plex [N-Term; K17]; 1×Phospho [S3(99)]	33946327 1×Phospho [S1023(99)]	0.00106419	0.000214298	1	1	7	33946327	33946327 [1021-1037]	0	2313.28	S3(Phospho): 99.98	1.62	4.48	1.68	1.66	0.98	1.25	1.08	2.76	1.46	1.15	0.77	0.9	4.34918	High	5.93e-05	0.0002464	18.12	High	0.0004613	1	S3(Phospho): 99.98	S3;	33946327	NP_005076.3	APVVRTPsIQPSLLP	Yes
PNN	5411	pinin [Homo sapiens]	S443	SLsPGKENVSALDMEK	33356174	3×TMT6plex [N-Term; K6; K16]; 1×Oxidation [M14]; 1×Phospho [S3(100)]	33356174 1×Phospho [S443(100)]	0.00028029	0.000147488	1	1	9	33356174	33356174 [441-456]	1	2488.3	S3(Phospho): 99.99	1.5	1.14	1.45	1.75	2.52	1.52	1.15	1.22	1.74	1.89	2	1.88	5.48301	High	2.03e-05	8.74e-05	12.13	High	0.001111	1	S3(Phospho): 99.99	S3;	33356174	NP_002678.2	DKECKSLsPGKENVS	Yes
TAF1	6872	transcription initiation factor TFIID subunit 1 isoform 3 [Homo sapiens]	S545	LLEPPVLTLDPNDENLILEIPDEKEEATSNsPSK	554503966	3×TMT6plex [N-Term; K24; K34]; 3×Deamidated [N12; N15; N30]; 1×Phospho [S31(95.1)]	554503966 1×Phospho [S545(95.1)]	0.000939002	0.000214298	1	3	10	20357585; 554503966; 20357588	554503966 [515-548]	1	4530.31	S31(Phospho): 95.09	0.63	1.18	1.82	1.89	1.63	1.77	0.93	0.95	1.13	0.99	1.28	0.99	5.59582	High	5.93e-05	0.0002247	10.11	High	0.0004749	1	S31(Phospho): 95.09	S31;	554503966	NP_001273003.1	KEEATSNsPSKESKK	No
HSP90AB1	3326	heat shock protein HSP 90-beta isoform a [Homo sapiens]	S718	LGLGIDEDEVAAEEPNAAVPDEIPPLEGDEDAsR	431822401	1×TMT6plex [N-Term]; 1×Deamidated [N16]; 1×Phospho [S33(100)]	431822401 1×Phospho [S718(100)]	0.00494368	0.000429788	1	3	3	431822401; 431822408; 431822406	431822401 [686-719]	0	3842.76	S33(Phospho): 100	1.54	1.86	1.92	2.07	1.4	1.29	2.61	3.82	2.58	2.89	1.96	2.08	3.57204	High	0.0001218	0.0008582	6.96	High	0.0008183	1	S33(Phospho): 100	S33;	431822401	NP_001258898.1	LEGDEDAsRMEEVD_	Yes
UBTF	7343	nucleolar transcription factor 1 isoform a [Homo sapiens]	S389	QATsPASK	7657671	2×TMT6plex [N-Term; K8]; 1×Phospho [S4(100)]	7657671 1×Phospho [S389(100)]	0.0953935	0.00439502	1	2	9	115529449; 7657671	7657671 [386-393]	0	1327.7	S4(Phospho): 100	2.58	1.58	1.38	0.61	1.05	0.51	3.76	1.74	3	1.78	2.68	2.61	3.35213	High	0.001023	0.01762	18.94	High	0.00961	1	S4(Phospho): 100	S4;	7657671	NP_055048.1	INKKQATsPASKKPA	Yes
RBM26	64062	RNA-binding protein 26 isoform 1 [Homo sapiens]	S127	LNHsPPQSSSR	557636667	1×TMT6plex [N-Term]; 1×Deamidated [Q/N]; 1×Phospho [S4(100)]	557636667 1×Phospho [S127(100)]	0.001854	0.000236062	1	3	11	557636667; 557636651; 31652264	557636667 [124-134]	0	1519.71	S4(Phospho): 100	1.86	1.7	1.24	1.37	1.38	1.69	1.62	1.41	1.09	1.21	1.39	1.37	3.56201	High	7.41e-05	0.0003794	20.32	High	0.0001165	1	S4(Phospho): 100	S4;	557636667	NP_001273560.1	FSRRLNHsPPQSSSR	Yes
NCOR2	9612	nuclear receptor corepressor 2 isoform 1 [Homo sapiens]	S956	ANAsPQKPLDLK	331284178	3×TMT6plex [N-Term; K7; K12]; 1×Phospho [S4(100)]	331284178 1×Phospho [S956(100)]	0.0562608	0.00250138	1	3	5	331284176; 331284180; 331284178	331284178 [953-964]	0	2049.17	S4(Phospho): 100	1.66	1.43	1.47	1.46	1.7	1.43	2.28	1.81	2.45	3.51	3.63	3.45	3.14685	High	0.001237	0.02179	6.22	High	0.008136	1	S4(Phospho): 100	S4;	331284178	NP_006303.4	GDPRANAsPQKPLDL	Yes
RIF1	55183	telomere-associated protein RIF1 isoform 1 [Homo sapiens]	S1579	SNEsVDIQDQEEK	56676335	2×TMT6plex [N-Term; K13]; 1×Phospho [S4(100)]	56676335 1×Phospho [S1579(100)]	0.00570713	0.000478316	1	2	2	295054210; 56676335	56676335 [1576-1588]	0	2058.96	S4(Phospho): 99.99	1.8	1.83	1.77	1.45	3.05	1.67							3.928	High	0.0001251	0.0009777	26.93	High	0.0002108	1	S4(Phospho): 99.99	S4;	56676335	NP_060621.3	WKNKSNEsVDIQDQE	Yes
XRN2	22803	5'-3' exoribonuclease 2 [Homo sapiens]	S499	KAEDsDSEPEPEDNVR	18860916	2×TMT6plex [N-Term; K]; 1×Phospho [S5(100)]	18860916 1×Phospho [S499(100)]	0.000156169	9e-05	1	1	17	18860916	18860916 [495-510]	1	2355.08	S5(Phospho): 100	2.9	1.81	1.45	1.54	1.79	1.36	3.47	1.94	1.61	1.46	1.84	1.42	5.27161	High	2.03e-05	5.37e-05	33.88	High	7.92e-05	1	S5(Phospho): 100	S5;	18860916	NP_036387.2	IKRKAEDsDSEPEPE	Yes
SRRM1	10250	serine/arginine repetitive matrix protein 1 isoform 1 [Homo sapiens]	S768	SVSGsPEPAAK	742799254	2×TMT6plex [N-Term; K11]; 1×Phospho [S5(100)]	742799254 1×Phospho [S768(100)]	0.00155135	0.000236062	1	3	14	42542379; 742799254; 742799283	742799254 [764-774]	0	1567.81	S5(Phospho): 100	2.51	1.87	1.42	1.18	1.08	1.16	2.39	1.65	1.39	1.37	1.06	1.22	4.6902	High	7.18e-05	0.0003295	44.12	High	0.0001349	1	S5(Phospho): 100	S5;	742799254	NP_001290377.1	SSRSVSGsPEPAAKK	No
CDCA2	157313	cell division cycle-associated protein 2 [Homo sapiens]	S591	KPLLsPIPELPEVPEMTPSIPSIR	44681484	2×TMT6plex [N-Term; K]; 1×Phospho [S5(100)]	44681484 1×Phospho [S591(100)]	0.000566066	0.000193352	1	1	2	44681484	44681484 [587-610]	0	3178.76	S5(Phospho): 100	1.69	2.16	1.38	1.03	0.87	1.57							5.03467	High	5.25e-05	0.000154	12.75	High	0.0002679	1	S5(Phospho): 100	S5;	44681484	NP_689775.2	ASKKPLLsPIPELPE	Yes
MKI67	4288	antigen KI-67 isoform 1 [Homo sapiens]	S2105	IACKsPPPESMDTPTSTR	103472005	2×TMT6plex [N-Term; K4]; 1×Carbamidomethyl [C3]; 1×Phospho [S5(100)]	103472005 1×Phospho [S2105(100)]	0.0026364	0.00034134	1	2	10	103472005; 225543215	103472005 [2101-2118]	1	2513.22	S5(Phospho): 100	1.43	0.64	1.42	0.94	1.41	0.82	1.72	0.73	1.24	0.82	1.18	1.04	4.06972	High	0.0001764	0.001485	8.65	High	0.0008288	1	S5(Phospho): 100	S5;	103472005	NP_002408.3	TTKIACKsPPPESMD	Yes
AKAP12	9590	A-kinase anchor protein 12 isoform 1 [Homo sapiens]	S381	VELPsEEQVSGSQGPSEEKPAPLATEVFDEK	21493022	3×TMT6plex [N-Term; K19; K31]; 2×Phospho [S5(100); S/T]	21493022 2×Phospho [S381(100); S/T]	0.00311379	0.00036439	1	2	13	21493022; 21493024	21493022 [377-407]	0	4161.02	S5(Phospho): 100; S10(Phospho): 49.31; S12(Phospho): 49.31	1.93	1.88	1.57	2.67	1.35	1.37							3.80105	High	0.0001218	0.0005762	17.38	High	0.0002407	1	S5(Phospho): 100; S10(Phospho): 49.31; S12(Phospho): 49.31	S5;	21493022	NP_005091.2	YEKVELPsEEQVSGS	Yes
NOC2L	26155	nucleolar complex protein 2 homolog [Homo sapiens]	S49; S60	EAARsPDKPGGSPSAsR	157694511	2×TMT6plex [N-Term; K8]; 2×Phospho [S5(100); S12(99.9)]	157694511 2×Phospho [S49(100); S56(99.9)]	0.0102587	0.000778694	1	1	5	157694511	157694511 [45-61]	1	2288.08	S5(Phospho): 100; S16(Phospho): 99.95	1.77	1.27	1.54	0.97	1.45	1.62	1.32	1.12	1.33	1.09	1.23	1.25	4.0311	High	0.0002235	0.002412	2.62	High	0.0008515	1	S5(Phospho): 100; S16(Phospho): 99.95	S5; S16;	157694511	NP_056473.2	EAREAARsPDKPGGS;PGGSPSAsRRKGRAS	Yes;Yes
ANKRD26	22852	ankyrin repeat domain-containing protein 26 isoform 1 [Homo sapiens]	S631	ESVNsPVFGK	154354990	2×TMT6plex [N-Term; K10]; 1×Phospho [S5(100)]	154354990 1×Phospho [S631(100)]	0.00923599	0.00064256	1	2	2	365812504; 154354990	154354990 [627-636]	0	1601.83	S5(Phospho): 99.99	1.4	1.33	1.18	1.36	1.25	0.87							3.24846	High	0.0001801	0.001537	26.29	High	0.0002024	1	S5(Phospho): 99.99	S5;	154354990	NP_055730.2	TSKESVNsPVFGKAS	No
NUCKS1	64710	nuclear ubiquitous casein and cyclin-dependent kinase substrate 1 [Homo sapiens]	S181	ATVTPsPVKGK	56118310	3×TMT6plex [N-Term; K9; K11]; 1×Phospho [S6(100)]	56118310 1×Phospho [S181(100)]	0.0381166	0.00190073	1	1	14	56118310	56118310 [176-186]	1	1852.09	S6(Phospho): 100	1.84	2.85	1.3	0.98	1.59	1.33	1.84	2.78	1.65	1.04	1.56	1.63	3.14272	High	0.0009017	0.01532	16.64	High	0.0009905	1	S6(Phospho): 100	S6;	56118310	NP_073568.2	LKATVTPsPVKGKGK	Yes
SURF6	6838	surfeit locus protein 6 isoform 1 [Homo sapiens]	S74	SLGEKsPAASGAR	19557702	2×TMT6plex [N-Term; K5]; 1×Phospho [S6(100)]	19557702 1×Phospho [S74(100)]	0.00609756	0.000503144	1	2	4	525313672; 19557702	19557702 [69-81]	1	1768.94	S6(Phospho): 100	1.64	1.61	1.11	1.25	1.48	1.41	1.78	1.42	1.35	1.43	1.62	1.54	2.97084	High	0.0001985	0.001775	14.26	High	0.0001716	1	S6(Phospho): 100	S6;	19557702	NP_006744.2	AKSLGEKsPAASGAR	Yes
NCOA7	135112	nuclear receptor coactivator 7 isoform 1 [Homo sapiens]	S384	ETSHGsPTVTK	313850976	2×TMT6plex [N-Term; K11]; 1×Phospho [S6(100)]	313850976 1×Phospho [S384(100)]	0.000523639	0.000193352	1	3	4	170932526; 313850976; 313850978	313850976 [379-389]	0	1681.86	S6(Phospho): 100	1.58	1.97	1.81	1.8	1.9	1.69	1.31	1.27	1.58	1.34	1.46	1.22	4.34636	High	5.93e-05	0.0001816	22.25	High	8.36e-05	1	S6(Phospho): 100	S6;	313850976	NP_001186549.1	SRETSHGsPTVTKLS	Yes
PHF23	79142	PHD finger protein 23 isoform 1 [Homo sapiens]	S150	VASPLsPTSLTHTSRPPAALTPVPLSQGDLSHPPR	116268091	1×TMT6plex [N-Term]; 1×Phospho [S6(97.6)]	116268091 1×Phospho [S150(97.6)]	5.68e-05	6.55e-05	1	3	21	116268091; 548960904; 548960926	116268091 [145-179]	0	3894.05	S6(Phospho): 97.67	1.44	2.09	1.5	0.92	1.11	1.71	0.98	1.43	1.08	0.99	1.01	1.27	6.71419	High	1.3e-05	2.85e-05	32.44	High	2.27e-05	1	S6(Phospho): 97.67	S6;	116268091	NP_077273.2	PKVASPLsPTSLTHT	Yes
SRRM2	23524	serine/arginine repetitive matrix protein 2 [Homo sapiens]	S1064	GQSQTsPDHR	118572613	1×TMT6plex [N-Term]; 2×Deamidated [Q2; Q4]; 1×Phospho [T/S]		0.00146393	0.000236062	1	1	10	118572613	118572613 [1059-1068]	0	1423.61	S6(Phospho): 99.27	1.62	2.8	1.01	0.71	0.89	0.86							2.80142	High	0.0002235	0.002373	25.9	High	0.0001068	1	S6(Phospho): 99.27	S6;	118572613	NP_057417.3	LKGQSQTsPDHRSDT	Yes
CENPT	80152	centromere protein T [Homo sapiens]	S47	ALLETAsPR	126722969	1×TMT6plex [N-Term]; 1×Phospho [S7(100)]	126722969 1×Phospho [S47(100)]	0.176925	0.00941359	1	1	7	126722969	126722969 [41-49]	0	1266.67	S7(Phospho): 100	2.08	1.61	1.47	1.14	1.38	1.24	2.95	2.28	2.25	1.27	1.67	1.23	2.77171	High	0.002678	0.05275	22.4	High	0.002079	1	S7(Phospho): 100	S7;	126722969	NP_079358.3	RALLETAsPRKLSGQ	Yes
PHF20	51230	PHD finger protein 20 [Homo sapiens]	S488	SLEPEEsPGKR	18034775	2×TMT6plex [N-Term; K10]; 1×Phospho [S7(100)]	18034775 1×Phospho [S488(100)]	0.100646	0.00477916	1	1	3	18034775	18034775 [482-492]	1	1766.91	S7(Phospho): 100	1.7	1.76	1.63	1.27	1.38	1.51	2.61	2.2	2.51	1.61	1.6	1.81	2.63401	High	0.002004	0.0378	10.72	High	0.001094	1	S7(Phospho): 100	S7;	18034775	NP_057520.2	KSLEPEEsPGKRHVQ	Yes
CRTC1	23373	CREB-regulated transcription coactivator 1 isoform 1 [Homo sapiens]	S64	GQYYGGsLPNVNQIGSGTMDLPFQTPFQSSGLDTSR	148596965	1×TMT6plex [N-Term]; 1×Phospho [S7(100)]	148596965 1×Phospho [S64(100)]	5.4e-05	6.55e-05	1	1	10	148596965	148596965 [58-93]	0	4128.92	S7(Phospho): 100	1	1.81	2.38	0.76	0.7	1.66	0.76	1.78	1.31	0.87	0.8	1.16	6.62077	High	1.3e-05	2.43e-05	33.91	High	5.72e-05	1	S7(Phospho): 100	S7;	148596965	NP_056136.2	RGQYYGGsLPNVNQI	Yes
NUCB2	4925	nucleobindin-2 precursor [Homo sapiens]	S332	EFLEPDsWETLDQQQFFTEEELK	4826870	2×TMT6plex [N-Term; K23]; 3×Deamidated [Q13; Q14; Q15]; 1×Phospho [S7(98.4)]	4826870 1×Phospho [S332(98.4)]	0.00169003	0.000236062	1	1	3	4826870	4826870 [326-348]	0	3429.56	S7(Phospho): 98.45	0.88	0.93	0.81	0.99	1.58	7.56							2.77928	High	7.41e-05	0.0003535	29.82	High	0.0001196	1	S7(Phospho): 98.45	S7;	4826870	NP_005004.1	KEFLEPDsWETLDQQ	Yes
NUP50	10762	nuclear pore complex protein Nup50 isoform b [Homo sapiens]	S221	VAAETQsPSLFGSTK	24497451	2×TMT6plex [N-Term; K15]; 1×Phospho [S7(99)]	24497451 1×Phospho [S221(99)]	0.000268521	0.000147488	1	2	4	24497451; 24497447	24497451 [215-229]	0	2061.07	S7(Phospho): 98.98	1.52	2.2	1.97	1.92	1.61	1.5	1.63	1.68	1.68	1.95	1.65	1.74	3.84268	High	5.25e-05	0.0001558	41.35	High	7.92e-05	1	S7(Phospho): 98.98	S7;	24497451	NP_009103.2	KVAAETQsPSLFGST	Yes
NOC2L	26155	nucleolar complex protein 2 homolog [Homo sapiens]	S672	DLFDLNsSEEDDTEGFSER	157694511	1×TMT6plex [N-Term]; 1×Phospho [S7(100)]	157694511 1×Phospho [S672(100)]	0.000120085	9e-05	1	1	7	157694511	157694511 [666-684]	0	2514.04	S7(Phospho): 99.99	1.64	3.39	1.48	1.48	1.13	1.66	1	0.67	0.71	0.6	0.75	0.69	4.80093	High	2.03e-05	4.31e-05	53.7	High	5.23e-05	1	S7(Phospho): 99.99	S7;	157694511	NP_056473.2	KDLFDLNsSEEDDTE	Yes
GTPBP1	9567	GTP-binding protein 1 [Homo sapiens]	S580	LLQTTNNsPMNSKPQQIK	82546879	3×TMT6plex [N-Term; K13; K18]; 1×Deamidated [N]; 1×Oxidation [M10]; 1×Phospho [S8(100)]	82546879 1×Phospho [S580(100)]	0.00136817	0.000236062	1	1	2	82546879	82546879 [573-590]	0	2826.5	S8(Phospho): 100	1.99	1.9	1.81	1.32	1.84	1.7							4.09321	High	7.18e-05	0.0002994	11.38	High	0.0001264	1	S8(Phospho): 100	S8;	82546879	NP_004277.2	LLQTTNNsPMNSKPQ	Yes
EPB41L1	2036	band 4.1-like protein 1 isoform a [Homo sapiens]	S437	SLDGAEFsRPASVSENHDAGPDGDKR	30061489	2×TMT6plex [N-Term; K25]; 1×Phospho [S1(100)]	30061489 1×Phospho [S430(100)]	4.5e-05	6.55e-05	1	4	14	385251401; 385251397; 385251399; 30061489	30061489 [430-455]	1	3252.53	S8(Phospho): 97.96	1.05	1.22	0.92	2.02	1.56	0.85							8.90944	High	1.3e-05	1.97e-05	18.32	High	5.72e-05	1	S8(Phospho): 97.96	S8;	30061489	NP_036288.2	SLDGAEFsRPASVSE	Yes
MIA3	375056	melanoma inhibitory activity protein 3 isoform 1 precursor [Homo sapiens]	S727	VEEDDYPsEELLEDENAINAK	122891870	2×TMT6plex [N-Term; K21]; 1×Phospho [S8(98.8)]	122891870 1×Phospho [S727(98.8)]	0.000532221	0.000193352	1	1	4	122891870	122891870 [720-740]	0	2960.37	S8(Phospho): 98.84	1.57	1.96	0.92	1.03	1.01	2.45	1.68	2.17	1.03	1.13	0.65	2.19	4.62354	High	5.25e-05	0.0001469	38.82	High	0.0001674	1	S8(Phospho): 98.84	S8;	122891870	NP_940953.2	VEEDDYPsEELLEDE	Yes
L1CAM	3897	neural cell adhesion molecule L1 isoform 2 precursor [Homo sapiens]	S1177	DETFGEYsDNEEK	13435353	2×TMT6plex [N-Term; K13]; 1×Phospho [S8(99.2)]	13435353 1×Phospho [S1177(99.2)]	0.00217976	0.000261096	1	2	2	221316760; 13435353	13435353 [1170-1182]	0	2100.91	S8(Phospho): 99.17	0.95	1.3	1.34	0.93	0.54	1.47							2.78738	High	7.89e-05	0.0004318	16.98	High	0.0001301	1	S8(Phospho): 99.17	S8;	13435353	NP_076493.1	DETFGEYsDNEEKAF	Yes
MGMT	4255	methylated-DNA--protein-cysteine methyltransferase [Homo sapiens]	S232	GAGATSGsPPAGR	197304670	1×TMT6plex [N-Term]; 1×Phospho [S8(100)]	197304670 1×Phospho [S232(100)]	0.000287881	0.000147488	1	1	55	197304670	197304670 [225-237]	0	1394.66	S8(Phospho): 99.99	0.97	1.22	1.11	0.59	1.58	1.02	0.96	1.17	1.15	0.72	2.28	1.03	3.94061	High	7.41e-05	0.0003491	54.35	High	6.51e-05	1	S8(Phospho): 99.99	S8;	197304670	NP_002403.2	GAGATSGsPPAGRN_	No
TOP2A	7153	DNA topoisomerase 2-alpha [Homo sapiens]	S1247	IKNENTEGsPQEDGVELEGLK	19913406	3×TMT6plex [N-Term; K2; K21]; 1×Phospho [S9(100)]	19913406 1×Phospho [S1247(100)]	4.95e-05	6.55e-05	1	1	11	19913406	19913406 [1239-1259]	1	3053.56	S9(Phospho): 100	1.64	1.18	1.79	1	1.42	1.11	2.3	1.93	3.28	2.03	2.64	2.39	7.41828	High	1.3e-05	2.95e-05	46.99	High	2.27e-05	1	S9(Phospho): 100	S9;	19913406	NP_001058.2	KNENTEGsPQEDGVE	Yes
TP53	7157	cellular tumor antigen p53 isoform a [Homo sapiens]	S315	ALPNNTSSsPQPK	120407068	2×TMT6plex [N-Term; K13]; 1×Deamidated [N]; 1×Phospho [S/T]		0.000509046	0.000193352	1	12	42	187830901; 454543597; 454545207; 187830894; 454545707; 371502119; 187830909; 120407068; 454544715; 187830823; 454544286; 187830855	120407068 [307-319]	0	1879.96	S9(Phospho): 97.62	2.14	1.07	0.87	0.91	1.02	0.75	2.03	0.97	0.83	0.85	0.98	0.77	4.13496	High	0.0001218	0.0005891	36.03	High	0.0001662	1	S9(Phospho): 97.62	S9;	120407068	NP_000537.3	LPNNTSSsPQPKKKP	Yes
TP53	7157	cellular tumor antigen p53 isoform a [Homo sapiens]	S315	ALPNNTSSsPQPK	120407068	2×TMT6plex [N-Term; K13]; 2×Deamidated [N/Q]; 1×Phospho [S9(98)]	120407068 1×Phospho [S315(98)]	0.000875062	0.000214298	1	12	43	187830901; 454543597; 454545207; 187830894; 454545707; 371502119; 187830909; 120407068; 454544715; 187830823; 454544286; 187830855	120407068 [307-319]	0	1880.94	S9(Phospho): 97.96	1.59	2.06	0.98	0.92	0.91	0.99	1.91	1.54	0.75	0.72	0.6	0.37	3.56963	High	5.93e-05	0.0002496	35.18	High	8.36e-05	1	S9(Phospho): 97.96	S9;	120407068	NP_000537.3	LPNNTSSsPQPKKKP	Yes
PAXBP1	94104	PAX3- and PAX7-binding protein 1 isoform 1 [Homo sapiens]	S557; S558	MADHLEGLssDDEETSTDITNFNLEK	22035565	2×TMT6plex [N-Term; K26]; 2×Phospho [S9(99.8); S10(99.8)]	22035565 2×Phospho [S557(99.8); S558(99.8)]	9.37e-05	9e-05	1	2	2	22035565; 22035569	22035565 [549-574]	0	3529.54	S9(Phospho): 99.82; S10(Phospho): 99.82	1.46	2.83	1.42	1.27	1.73	1.27							5.26976	High	2.03e-05	3.63e-05	20.5	High	8.27e-05	1	S9(Phospho): 99.82; S10(Phospho): 99.82	S9; S10;	22035565	NP_057715.2	ADHLEGLsSDDEETS;DHLEGLSsDDEETST	Yes;Yes
PDS5B	23047	sister chromatid cohesion protein PDS5 homolog B [Homo sapiens]	S1182	LDSSEMDHsENEDYTMSSPLPGK	7657269	2×TMT6plex [N-Term; K23]; 1×Phospho [S9(100)]	7657269 1×Phospho [S1182(100)]	4.6e-05	6.55e-05	1	1	19	7657269	7657269 [1174-1196]	0	3107.36	S9(Phospho): 99.98	1.2	1.38	1.09	1.93	1.72	1.66	1.34	1.58	1.94	2.2	2.84	2.01	5.84912	High	1.3e-05	2.21e-05	57.18	High	1.91e-05	1	S9(Phospho): 99.98	S9;	7657269	NP_055847.1	DSSEMDHsENEDYTM	Yes
PRRC2C	23215	protein PRRC2C [Homo sapiens]	T2673	AFGSGIDIKPGtPPIAGR	115298682	2×TMT6plex [N-Term; K9]; 1×Phospho [T12(100)]	115298682 1×Phospho [T2673(100)]	0.0040572	0.000383028	1	1	1	115298682	115298682 [2662-2679]	0	2292.25	T12(Phospho): 100	1.58	1.79	1.87	1.06	1.63	1.45							3.16164	High	0.0001218	0.0007219					T12(Phospho): 100	T12;	115298682	NP_055987.2	GIDIKPGtPPIAGRS	Yes
FAM83D	81610	protein FAM83D [Homo sapiens]	T486; S492	GtQSTEGsPVSK	116235448	2×TMT6plex [N-Term; K12]; 2×Phospho [T2(97.1); S8(100)]	116235448 2×Phospho [T486(97.1); S492(100)]	0.154198	0.00793018	1	1	8	116235448	116235448 [485-496]	0	1795.83	T2(Phospho): 97.07; S8(Phospho): 100	1.58	2.13	1.82	1.28	1.81	1.26							3.05333	High	0.002844	0.05565	7.95	High	0.004252	1	T2(Phospho): 97.07; S8(Phospho): 100	T2; S8;	116235448	NP_112181.2	NILFPRGtQSTEGSP;GTQSTEGsPVSKMSV	No;No
SLC44A2	57153	choline transporter-like protein 2 isoform 1 [Homo sapiens]	T14	HGtPQKYDPTFK	222831612	3×TMT6plex [N-Term; K6; K12]; 1×Phospho [T3(100)]	222831612 1×Phospho [T14(100)]	0.000398768	0.000193352	1	1	4	222831612	222831612 [12-23]	1	2186.16	T3(Phospho): 100	0.72	1.06	0.79	1.36	2.15	0.5	0.65	0.92	0.65	1.44	2.09	0.46	5.29864	High	3.79e-05	0.0001173	11.27	High	0.0003244	1	T3(Phospho): 100	T3;	222831612	NP_065161.3	HYYGKHGtPQKYDPT	Yes
DPYSL2	1808	dihydropyrimidinase-related protein 2 isoform 1 [Homo sapiens]	T619	TVtPASSAK	308818195	2×TMT6plex [N-Term; K9]; 1×Phospho [T3(99.3)]	308818195 1×Phospho [T619(99.3)]	0.0396215	0.00199165	1	3	18	4503377; 347543829; 308818195	308818195 [617-625]	0	1399.76	T3(Phospho): 99.99	1.64	2	1.73	1.42	1.54	2.06	2.03	2.18	2.04	1.74	1.79	2.88	2.76813	High	0.003477	0.06918	17.27	High	0.0006089	1	T3(Phospho): 99.99	T3;	308818195	NP_001184222.1	SVTPKTVtPASSAKT	Yes
MARCKSL1	65108	MARCKS-related protein [Homo sapiens]	T148	AAAtPESQEPQAK	13491174	2×TMT6plex [N-Term; K13]; 2×Deamidated [Q8; Q11]; 1×Phospho [T4(100)]	13491174 1×Phospho [T148(100)]	0.0145651	0.000870764	1	1	2	13491174	13491174 [145-157]	0	1867.91	T4(Phospho): 100	1.3	3.16	1.68	1.57	1.1	1.66							2.03209	High	0.000411	0.005475	19.83	High	0.0002291	1	T4(Phospho): 100	T4;	13491174	NP_075385.1	QEGKAAAtPESQEPQ	Yes
SLC44A2	57153	choline transporter-like protein 2 isoform 2 [Homo sapiens]	T12	KNGAYGtPQK	222831610	3×TMT6plex [N-Term; K10; K]; 1×Deamidated [N2]; 1×Phospho [T7(99.2)]	222831610 1×Phospho [T12(99.2)]	0.00651827	0.000523051	1	1	3	222831610	222831610 [6-15]	1	1831.99	T7(Phospho): 99.25	1.54	2.99	1.32	1.42	1.11	1.73	1.06	1.94	1.13	1.3	0.75	1.64	3.26907	High	0.0001414	0.001105	9.26	High	0.0004826	1	T7(Phospho): 99.25	T7;	222831610	NP_001138528.1	RKNGAYGtPQKYDPT	Yes
PNKP	11284	bifunctional polynucleotide phosphatase/kinase [Homo sapiens]	T118	TPESQPDtPPGTPLVSQDEK	31543419	2×TMT6plex [N-Term; K20]; 2×Deamidated [Q5; Q17]; 1×Phospho [T8(100)]	31543419 1×Phospho [T118(100)]	0.000780121	0.000193352	1	1	5	31543419	31543419 [111-130]	0	2663.27	T8(Phospho): 100	2.08	1.61	1.76	1.42	1.43	1.48	1.39	1.29	1.56	1.16	1	1.01	4.21238	High	5.93e-05	0.0001982	38.48	High	8.27e-05	1	T8(Phospho): 100	T8;	31543419	NP_009185.2	TPESQPDtPPGTPLV	Yes
MELK	9833	maternal embryonic leucine zipper kinase isoform 1 [Homo sapiens]	S505	sVELDLNQAHMEETPK	7661974	2×TMT6plex [N-Term; K16]; 1×Phospho [S1(100)]	7661974 1×Phospho [S505(100)]	4.27e-05	6.55e-05	1	9	4	375493542; 375493546; 375493540; 375340329; 375493538; 375493536; 375493532; 375493544; 7661974	7661974 [505-520]	0	2379.17	S1(Phospho): 100	1.95	1.5	2.28	1.5	1.76	1.86	2.73	1.74	2.54	1.43	1.71	2.29	7.09305	High	0	1.57e-05	37.15	High	2.27e-05	1	S1(Phospho): 100	S1;	7661974	NP_055606.1	SPERRCRsVELDLNQ	Yes
ZYX	7791	zyxin [Homo sapiens]	S344	sPGAPGPLTLK	4508047	2×TMT6plex [N-Term; K11]; 1×Phospho [S1(100)]	4508047 1×Phospho [S344(100)]	0.000191489	0.00012481	1	1	22	4508047	4508047 [344-354]	0	1575.89	S1(Phospho): 100	1.9	3.08	1.62	1	0.83	1.58	1.53	2.59	1.6	1.1	0.55	1.87	4.47889	High	2.03e-05	6.27e-05	40.87	High	0.001051	1	S1(Phospho): 100	S1;	4508047	NP_003452.1	QNQNQVRsPGAPGPL	Yes
EPB41L3	23136	band 4.1-like protein 3 isoform 2 [Homo sapiens]	S443	sLDGASVNENHEIYMK	528281419	2×TMT6plex [N-Term; K16]; 1×Phospho [S1(100)]	528281419 1×Phospho [S443(100)]	8.25e-05	9e-05	1	3	4	528281419; 528281421; 528281423	528281419 [443-458]	0	2345.12	S1(Phospho): 100	1.83	1.95	0.92	1.41	1.36	1.84	3.99	2.04	2.01	3.33	1.91	2.55	5.73964	High	2.03e-05	3.35e-05	15.64	High	8.36e-05	1	S1(Phospho): 100	S1;	528281419	NP_001268462.1	KRYTMSRsLDGASVN	Yes
TGFB1I1	7041	transforming growth factor beta-1-induced transcript 1 protein isoform 1 [Homo sapiens]	S68	sPKPAAPAAPPFSSSSGVLGTGLCELDR	109638745	2×TMT6plex [N-Term; K3]; 1×Carbamidomethyl [C24]; 1×Phospho [S1(100)]	109638745 1×Phospho [S68(100)]	4.27e-05	0	1	2	20	21361591; 109638745	109638745 [68-95]	0	3307.68	S1(Phospho): 100	1.65	2.69	1.41	1.9	0.98	1.84	1.58	2.59	1.75	1.98	0.97	2.02	8.73086	High	0	4.31e-06	53.26	High	1.91e-05	1	S1(Phospho): 100	S1;	109638745	NP_001035919.1	STVCKPRsPKPAAPA	Yes
MAP4	4134	microtubule-associated protein 4 isoform 1 [Homo sapiens]	S825	sPSTLLPK	47519639	2×TMT6plex [N-Term; K8]; 1×Phospho [S1(100)]	47519639 1×Phospho [S825(100)]	0.0226922	0.00137655	1	2	8	47519639; 197276600	47519639 [825-832]	0	1380.79	S1(Phospho): 100	1.6	2.17	1.47	1.15	1.07	1.86	1.14	1.88	1.31	0.67	0.98	1.08	3.13911	High	0.001448	0.02629	13.29	High	0.003091	1	S1(Phospho): 100	S1;	47519639	NP_002366.2	STGPSSRsPSTLLPK	Yes
CEP170	9859	centrosomal protein of 170 kDa isoform alpha [Homo sapiens]	S1165	sDSEATISR	109255228	1×TMT6plex [N-Term]; 1×Phospho [S1(100)]	109255228 1×Phospho [S1165(100)]	0.00517327	0.000429788	1	3	4	109255228; 109255230; 109255232	109255228 [1165-1173]	0	1274.58	S1(Phospho): 100	1.28	1.05	1.43	1.05	1.18	2.01	1.34	1.26	1.49	0.95	1.06	2.29	3.33933	High	0.0001218	0.0008926	15.57	High	0.0006272	1	S1(Phospho): 100	S1;	109255228	NP_055627.2	LGSLSARsDSEATIS	Yes
PLEKHA6	22874	pleckstrin homology domain-containing family A member 6 [Homo sapiens]	S808	sAVFPGEGK	37595548	2×TMT6plex [N-Term; K9]; 1×Phospho [S1(100)]	37595548 1×Phospho [S808(100)]	0.00109058	0.000214298	1	1	10	37595548	37595548 [808-816]	0	1429.75	S1(Phospho): 100	0.83	2.67	0.89	1.71	1.08	1.2	0.66	2.78	0.71	1.72	1.1	1.06	3.9814	High	5.93e-05	0.0002516	18.54	High	0.0002024	1	S1(Phospho): 100	S1;	37595548	NP_055750.2	SSQERPKsAVFPGEG	Yes
FGD6	55785	FYVE, RhoGEF and PH domain-containing protein 6 [Homo sapiens]	S1197	sLDEADSENKEEVSPLGSK	154240686	3×TMT6plex [N-Term; K10; K19]; 1×Phospho [S1(100)]	154240686 1×Phospho [S1197(100)]	0.000566066	0.000193352	1	1	4	154240686	154240686 [1197-1215]	1	2801.41	S1(Phospho): 100	0.79	0.5	1.8	2.31	1.19	1.8	1.17	0.79	2.17	3.46	1.68	3.32	4.25129	High	5.25e-05	0.000154	10.46	High	0.0002374	1	S1(Phospho): 100	S1;	154240686	NP_060821.3	ITFCPSRsLDEADSE	Yes
CCDC132	55610	coiled-coil domain-containing protein 132 isoform a [Homo sapiens]	S494; S498	sPSVsPSKQPVSTSSK	62865871	3×TMT6plex [N-Term; K8; K16]; 2×Phospho [S1(100); S5(100)]	62865871 2×Phospho [S494(100); S498(100)]	0.0106267	0.000778694	1	2	3	384229074; 62865871	62865871 [494-509]	1	2450.25	S1(Phospho): 100; S5(Phospho): 99.99	2.22	1.97	1.74	1.48	1.7	1.61	2.04	1.66	1.67	1.07	1.59	1.44	3.10834	High	0.0001951	0.001759	5	High	0.0004163	1	S1(Phospho): 100; S5(Phospho): 99.99	S1; S5;	62865871	NP_060137.2	KFMEQSRsPSVSPSK;QSRSPSVsPSKQPVS	Yes;Yes
KIF23	9493	kinesin-like protein KIF23 isoform 2 [Homo sapiens]	S682; S684	sVsPSPVPLLFQPDQNAPPIR	6754472	1×TMT6plex [N-Term]; 2×Phospho [S1(97.5); S3(99.9)]	6754472 2×Phospho [S682(97.5); S684(99.9)]	0.0113262	0.000778694	1	1	3	6754472	6754472 [682-702]	0	2648.31	S1(Phospho): 97.52; S3(Phospho): 99.93	1.78	2.58	0.73	1.09	0.77	0.97							2.84802	High	0.0003287	0.003804	1.65	High	0.001245	1	S1(Phospho): 97.52; S3(Phospho): 99.93	S1; S3;	6754472	NP_004847.2	REKVTQRsVSPSPVP;KVTQRSVsPSPVPLL	Yes;Yes
DENND4C	55667	DENN domain-containing protein 4C [Homo sapiens]	S1125	sSPVPEMLEESQELLEPVVDDVPK	408684407	2×TMT6plex [N-Term; K24]; 1×Deamidated [Q12]; 1×Oxidation [M7]; 1×Phospho [S1(97.8)]	408684407 1×Phospho [S1125(97.8)]	0.00622048	0.000503144	1	1	4	408684407	408684407 [1125-1148]	0	3221.58	S1(Phospho): 97.8	2.16	1.31	1.7	1.37	1.95	1.27							4.01241	High	0.0001764	0.001474	28.31	High	0.0004033	1	S1(Phospho): 97.8	S1;	408684407	NP_060395.5	TWNPEHRsSPVPEML	No
RAPH1	65059	ras-associated and pleckstrin homology domains-containing protein 1 isoform 1 [Homo sapiens]	S569	sQSIVSSVFSEAWK	47132519	2×TMT6plex [N-Term; K14]; 1×Deamidated [Q2]; 1×Phospho [S1(99)]	47132519 1×Phospho [S569(99)]	0.00432159	0.000406702	1	2	3	42740893; 47132519	47132519 [569-582]	0	2094.06	S1(Phospho): 99.03	0.77	5.59	1.46	0.54	0.68	0.9							3.51861	High	0.0001218	0.0007611	12.97	High	0.0006089	1	S1(Phospho): 99.03	S1;	47132519	NP_998754.1	QPAGHVRsQSIVSSV	Yes
SLC9A3R1	9368	Na(+)/H(+) exchange regulatory cofactor NHE-RF1 [Homo sapiens]	S288	sASSDTSEELNSQDSPPK	4759140	2×TMT6plex [N-Term; K18]; 1×Phospho [S3(98.4)]	4759140 1×Phospho [S290(98.4)]	6.31e-05	6.55e-05	1	1	113	4759140	4759140 [288-305]	0	2417.11	S1(Phospho): 99.22	1.16	1.26	1.39	1.35	2.06	1.32	1	0.89	1.3	1.27	2.11	1.08	6.39064	High	2.03e-05	4.28e-05	54.91	High	8.27e-05	1	S1(Phospho): 99.22	S1;	4759140	NP_004243.1	PRPALVRsASSDTSE	Yes
IQGAP3	128239	ras GTPase-activating-like protein IQGAP3 [Homo sapiens]	S1424	sLTAHSLLPLAEK	39753961	2×TMT6plex [N-Term; K13]; 1×Phospho [S1(100)]	39753961 1×Phospho [S1424(100)]	0.000337349	0.000147488	1	1	19	39753961	39753961 [1424-1436]	0	1918.08	S1(Phospho): 99.99	1.58	1.69	4.39	1.55	1.55	1.85	1.69	1.9	6.14	1.29	1.39	1.86	4.678	High	2.62e-05	0.0001024	20.31	High	0.0002874	1	S1(Phospho): 99.99	S1;	39753961	NP_839943.2	EPLRRHRsLTAHSLL	Yes
DNAJA1	3301	dnaJ homolog subfamily A member 1 [Homo sapiens]	S335	VNFPENGFLsPDKLSLLEK	4504511	3×TMT6plex [N-Term; K13; K19]; 1×Phospho [S10(100)]	4504511 1×Phospho [S335(100)]	0.0627609	0.00285195	1	1	4	4504511	4504511 [326-344]	1	2914.59	S10(Phospho): 100	2.08	1.38	1.82	1.24	0.91	1.5	2.62	2.81	3.37	1.46	2	3.28	2.95756	High	0.0007182	0.01102	4.78	High	0.002467	1	S10(Phospho): 100	S10;	4504511	NP_001530.1	FPENGFLsPDKLSLL	Yes
LRWD1	222229	leucine-rich repeat and WD repeat-containing protein 1 [Homo sapiens]	S243	RPDDVPLSLsPSK	23097240	2×TMT6plex [N-Term; K13]; 1×Phospho [S10(100)]	23097240 1×Phospho [S243(100)]	5.01e-05	6.55e-05	1	1	10	23097240	23097240 [234-246]	0	1949.05	S10(Phospho): 100	2.08	1.56	1.72	1.69	1.27	1.7	1.75	1.38	1.54	1.19	1.24	1.33	7.11426	High	1.3e-05	2.26e-05	50.91	High	2.27e-05	1	S10(Phospho): 100	S10;	23097240	NP_690852.1	DDVPLSLsPSKRACA	Yes
PGRMC1	10857	membrane-associated progesterone receptor component 1 isoform 1 [Homo sapiens]	S57	GDQPAASGDsDDDEPPPLPR	5729875	1×TMT6plex [N-Term]; 1×Phospho [S10(100)]	5729875 1×Phospho [S57(100)]	8.47e-05	9e-05	1	2	10	544063461; 5729875	5729875 [48-67]	0	2345.01	S10(Phospho): 100	1.84	2.89	1.44	1.39	1.26	1.36	1.16	1.33	1.02	1.3	1.08	1.22	4.14393	High	2.03e-05	3.66e-05	38.9	High	2.27e-05	1	S10(Phospho): 100	S10;	5729875	NP_006658.1	QPAASGDsDDDEPPP	Yes
DDX21	9188	nucleolar RNA helicase 2 isoform 1 [Homo sapiens]	S71	AEPSEVDMNsPK	50659095	2×TMT6plex [N-Term; K12]; 1×Deamidated [N9]; 1×Phospho [S10(100)]	50659095 1×Phospho [S71(100)]	0.000943468	0.000214298	1	1	6	50659095	50659095 [62-73]	0	1842.86	S10(Phospho): 100	1.78	1.64	1.38	1.21	1.71	1.67	0.75	0.64	0.52	0.5	0.62	0.62	3.83224	High	5.93e-05	0.0002255	23.24	High	0.0001264	1	S10(Phospho): 100	S10;	50659095	NP_004719.2	PSEVDMNsPKSKKAK	Yes
HSPD1	3329	60 kDa heat shock protein, mitochondrial [Homo sapiens]	S70	TVIIEQSWGsPK	31542947	2×TMT6plex [N-Term; K12]; 1×Phospho [S10(100)]	31542947 1×Phospho [S70(100)]	0.000161649	9e-05	1	1	15	31542947	31542947 [61-72]	0	1883.01	S10(Phospho): 100	1.55	1.46	1.53	1.25	1.84	1.39	1.49	1.58	1.82	1.02	2.32	1.1	4.29862	High	5.93e-05	0.0001809	31.83	High	6.51e-05	1	S10(Phospho): 100	S10;	31542947	NP_002147.2	IIEQSWGsPKVTKDG	Yes
EPB41L3	23136	band 4.1-like protein 3 isoform 2 [Homo sapiens]	S793	TETISFGSVsPGGVK	528281419	2×TMT6plex [N-Term; K15]; 1×Phospho [S10(100)]	528281419 1×Phospho [S793(100)]	0.000100843	9e-05	1	4	4	528281419; 528281421; 528281423; 32490572	528281419 [784-798]	0	2004.05	S10(Phospho): 100	1.48	1.34	0.91	1.65	0.95	0.96	1.82	1.47	1.21	1.72	1.13	1.32	5.43576	High	2.03e-05	3.81e-05	44.29	High	3.2e-05	1	S10(Phospho): 100	S10;	528281419	NP_001268462.1	TISFGSVsPGGVKLE	No
WDR44	54521	WD repeat-containing protein 44 isoform 1 [Homo sapiens]	S403	EYVSNDAAQsDDEEKLQSQPTDTDGGR	45238858	2×TMT6plex [N-Term; K15]; 1×Phospho [S10(100)]	45238858 1×Phospho [S403(100)]	4.66e-05	6.55e-05	1	3	13	296841073; 45238858; 296841075	45238858 [394-420]	1	3493.56	S10(Phospho): 100	1.18	1.15	1.53	2.18	0.98	1.59	0.71	0.91	1.39	2.22	0.88	1.38	6.17727	High	1.3e-05	2.08e-05	31.9	High	3.2e-05	1	S10(Phospho): 100	S10;	45238858	NP_061918.3	VSNDAAQsDDEEKLQ	Yes
WDHD1	11169	WD repeat and HMG-box DNA-binding protein 1 isoform 1 [Homo sapiens]	S383	SHILEDDENsVDISMLK	5901892	2×TMT6plex [N-Term; K17]; 1×Phospho [S10(100)]	5901892 1×Phospho [S383(100)]	4.37e-05	6.55e-05	1	2	20	56550086; 5901892	5901892 [374-390]	0	2483.21	S10(Phospho): 100	1.09	1.16	2.41	1.51	1.53	1.63	0.91	1.1	2.33	1.33	1.37	1.37	6.83414	High	1.3e-05	2.05e-05	55.93	High	2.27e-05	1	S10(Phospho): 100	S10;	5901892	NP_009017.1	ILEDDENsVDISMLK	Yes
ANTXR1	84168	anthrax toxin receptor 1 isoform 1 precursor [Homo sapiens]	S362	EVPPPPAEEsEEEDDDGLPK	14149904	2×TMT6plex [N-Term; K20]; 1×Phospho [S10(100)]	14149904 1×Phospho [S362(100)]	5.88e-05	6.55e-05	1	1	22	14149904	14149904 [353-372]	0	2717.25	S10(Phospho): 100	1.05	1.73	1.55	1.32	0.7	1.43	1.35	2.22	1.56	1.13	0.92	1.21	6.04124	High	1.3e-05	2.61e-05	60.13	High	2.27e-05	1	S10(Phospho): 100	S10;	14149904	NP_115584.1	PPPPAEEsEEEDDDG	Yes
TRIM24	8805	transcription intermediary factor 1-alpha isoform a [Homo sapiens]	S811	SEWLDPSQKsPLHVGETR	47419911	2×TMT6plex [N-Term; K9]; 1×Phospho [S10(100)]	47419911 1×Phospho [S811(100)]	7.05e-05	9e-05	1	2	8	47419909; 47419911	47419911 [802-819]	1	2604.32	S10(Phospho): 100	1.05	0.7	1.76	1.33	2.15	1.3	1.09	0.65	2.06	1.39	2.31	1.1	6.80051	High	2.03e-05	8.23e-05	34.47	High	0.0001165	1	S10(Phospho): 100	S10;	47419911	NP_056989.2	WLDPSQKsPLHVGET	Yes
MAP7	9053	ensconsin isoform 2 [Homo sapiens]	S395	AAPAQVRPPsPGNIRPVK	310750350	2×TMT6plex [N-Term; K18]; 1×Phospho [S10(100)]	310750350 1×Phospho [S395(100)]	0.000418759	0.000193352	1	8	5	310750348; 4505101; 310750354; 310750366; 310750368; 310750350; 310750362; 310750364	310750350 [386-403]	0	2393.36	S10(Phospho): 100	0.97	1.09	0.84	1.23	1.49	0.83							5.20668	High	3.79e-05	0.0001221	6.16	High	0.0001264	1	S10(Phospho): 100	S10;	310750350	NP_001185538.1	PAQVRPPsPGNIRPV	No
TOP2B	7155	DNA topoisomerase 2-beta [Homo sapiens]	S1461	SEDDSAKFDsNEEDSASVFSPSFGLK	19913408	3×TMT6plex [N-Term; K7; K26]; 1×Phospho [S10(100)]	19913408 1×Phospho [S1461(100)]	6.6e-05	6.55e-05	1	1	2	19913408	19913408 [1452-1477]	1	3562.67	S10(Phospho): 100	0.7	0.79	1.42	1.64	2.56	1.49							5.53111	High	1.3e-05	2.86e-05	41.75	High	2.27e-05	1	S10(Phospho): 100	S10;	19913408	NP_001059.2	DDSAKFDsNEEDSAS	No
MAP1S	55201	microtubule-associated protein 1S isoform 1 [Homo sapiens]	S655; S657	SPAEGSERLsLsPLR	50428935	1×TMT6plex [N-Term]; 2×Phospho [S10(100); S12(100)]	50428935 2×Phospho [S655(100); S657(100)]	0.0571466	0.00254602	1	2	2	816197590; 50428935	50428935 [646-660]	1	1987.95	S10(Phospho): 100; S12(Phospho): 100	1.44	2.03	1.36	1	1.15	1.26	2.4	2.32	1.54	1.75	1.76	2.09	3.53828	High	0.002096	0.04019					S10(Phospho): 100; S12(Phospho): 100	S10; S12;	50428935	NP_060644.4	AEGSERLsLSPLRGG;GSERLSLsPLRGGEA	Yes;Yes
IGSF5	150084	immunoglobulin superfamily member 5 [Homo sapiens]	S387; S392	ADQRPPRPAsHPQAsFNLASPEK	122937285	2×TMT6plex [N-Term; K23]; 1×Deamidated [Q/N]; 2×Phospho [S10(100); S15(100)]	122937285 2×Phospho [S387(100); S392(100)]	0.0161313	0.000964944	1	1	20	122937285	122937285 [378-400]	0	3120.51	S10(Phospho): 100; S15(Phospho): 100	1.62	2.97	1.13	0.73	0.69	0.57	0.87	1.79	0.57	0.26	0.33	0.49	4.40292	High	0.001464	0.02687	21.91	High	0.002414	1	S10(Phospho): 100; S15(Phospho): 100	S10; S15;	122937285	NP_001073913.1	QRPPRPAsHPQASFN;PASHPQAsFNLASPE	No;No
TSC2	7249	tuberin isoform 1 [Homo sapiens]	S1371	VVSSEGGRPsVDLSFQPSQPLSK	116256352	2×TMT6plex [N-Term; K23]; 1×Phospho [S10(96.5)]	116256352 1×Phospho [S1371(96.5)]	0.0254079	0.00139708	1	3	4	116256350; 167412124; 116256352	116256352 [1362-1384]	0	2939.53	S10(Phospho): 96.46	1.26	2.05	1.74	1.42	1.58	1.89							2.50924	High	0.0003502	0.004232	6.95	High	0.0005388	1	S10(Phospho): 96.46	S10;	116256352	NP_000539.2	SSEGGRPsVDLSFQP	Yes
PSMF1	9491	proteasome inhibitor PI31 subunit [Homo sapiens]	S252	FDPFGPIGTsPPGPNPDHLPPPGYDDMYL	145611426	1×TMT6plex [N-Term]; 1×Phospho [S10(97.5)]	145611426 1×Phospho [S252(97.5)]	0.000285957	0.000147488	1	1	66	145611426	145611426 [243-271]	0	3419.55	S10(Phospho): 97.46	2.38	0.72	1.31	1.31	1.51	1.14	1.33	0.68	0.78	0.93	1.01	0.9	3.93269	High	2.62e-05	0.0001092	20.16	High	8.27e-05	1	S10(Phospho): 97.46	S10;	145611426	NP_006805.2	PFGPIGTsPPGPNPD	Yes
MPRIP	23164	myosin phosphatase Rho-interacting protein isoform 1 [Homo sapiens]	S977	AATEALGEKsPDSATVSGYDIMK	50980307	3×TMT6plex [N-Term; K9; K23]; 1×Oxidation [M22]; 1×Phospho [S10(98.5)]	50980307 1×Phospho [S977(98.5)]	0.00222983	0.000289024	1	2	2	50980301; 50980307	50980307 [968-990]	1	3124.57	S10(Phospho): 98.49	1.12	2.06	1.28	1.5	0.98	1.34							2.97014	High	0.0002269	0.002515	14.78	High	0.0001264	1	S10(Phospho): 98.49	S10;	50980307	NP_055949.2	TEALGEKsPDSATVS	Yes
BCLAF1	9774	bcl-2-associated transcription factor 1 isoform 1 [Homo sapiens]	S198	DTFEHDPSEsIDEFNK	7661958	2×TMT6plex [N-Term; K16]; 1×Phospho [S10(98.6)]	7661958 1×Phospho [S198(98.6)]	0.00291511	0.00036439	1	4	2	117938251; 117938254; 7661958; 666335584	7661958 [189-204]	0	2448.1	S10(Phospho): 98.57	1.36	3.93	1.14	1.08	1.01	0.9							3.02327	High	0.0001218	0.0005458	6.01	High	0.0004749	1	S10(Phospho): 98.57	S10;	7661958	NP_055554.1	FEHDPSEsIDEFNKS	Yes
FUBP1	8880	far upstream element-binding protein 1 isoform 2 [Homo sapiens]	S630	QQAAYYAQTsPQGMPQHPPAPQGQ	17402900	1×TMT6plex [N-Term]; 1×Phospho [S10(98.8)]	17402900 1×Phospho [S630(98.8)]	4.27e-05	6.55e-05	1	2	32	17402900; 742670570	17402900 [621-644]	0	2890.32	S10(Phospho): 98.77	1.82	2.1	1.41	1.51	1.27	1.32	0.92	0.93	0.67	0.78	0.9	0.84	6.07064	High	0	1.47e-05	53.75	High	1.91e-05	1	S10(Phospho): 98.77	S10;	17402900	NP_003893.2	AAYYAQTsPQGMPQH	Yes
DYNC1LI2	1783	cytoplasmic dynein 1 light intermediate chain 2 isoform 1 [Homo sapiens]	S407	GGPASVPSSsPGTSVK	5453634	2×TMT6plex [N-Term; K16]; 1×Phospho [S10(100)]	5453634 1×Phospho [S407(100)]	0.000245357	0.000147488	1	2	20	5453634; 555290083	5453634 [398-413]	0	1953.01	S10(Phospho): 99.97	1.81	1.63	1.82	1.28	1.82	2.02	1.64	1.59	1.64	1.52	1.76	1.97	4.29146	High	2.03e-05	9.12e-05	30.03	High	8.27e-05	1	S10(Phospho): 99.97	S10;	5453634	NP_006132.1	PASVPSSsPGTSVKK	Yes
PIAS1	8554	E3 SUMO-protein ligase PIAS1 [Homo sapiens]	S503	GILSLPHQAsPVSR	7706637	1×TMT6plex [N-Term]; 1×Deamidated [Q8]; 1×Phospho [S10(100)]	7706637 1×Phospho [S503(100)]	0.000121468	9e-05	1	1	4	7706637	7706637 [494-507]	0	1771.93	S10(Phospho): 99.99	1.81	1.82	1.39	1.48	1.59	1.63	2.02	2.64	1.36	1.65	1.58	1.47	5.01631	High	4.98e-05	0.0001329	31.73	High	5.23e-05	1	S10(Phospho): 99.99	S10;	7706637	NP_057250.1	LSLPHQAsPVSRTPS	Yes
MTCL1	23255	microtubule cross-linking factor 1 [Homo sapiens]	S787	GCGFPVGEHsPHSR	163644316	1×TMT6plex [N-Term]; 1×Carbamidomethyl [C2]; 1×Phospho [S10(100)]	163644316 1×Phospho [S787(100)]	0.000790807	0.000193352	1	1	2	163644316	163644316 [778-791]	0	1832.81	S10(Phospho): 99.99	1.15	1.28	1.6	1.08	0.96	2.11							3.92496	High	5.93e-05	0.0001976	21.13	High	8.36e-05	1	S10(Phospho): 99.99	S10;	163644316	NP_056025.2	GFPVGEHsPHSRVQI	No
PLA2G4A	5321	cytosolic phospholipase A2 [Homo sapiens]	S437	HIVSNDSSDsDDESHEPK	23943920	2×TMT6plex [N-Term; K18]; 1×Phospho [S10(100)]	23943920 1×Phospho [S437(100)]	4.27e-05	6.55e-05	1	1	55	23943920	23943920 [428-445]	0	2536.12	S10(Phospho): 99.99	0.96	1.11	0.9	1.06	1.78	1.9	0.83	1.08	0.84	1.21	1.8	1.77	7.99277	High	0	1.12e-05	42.91	High	2.27e-05	1	S10(Phospho): 99.99	S10;	23943920	NP_077734.1	VSNDSSDsDDESHEP	Yes
MLLT4	4301	afadin isoform 4 [Homo sapiens]	S1141	SSPNVANQPPsPGGK	634743290	2×TMT6plex [N-Term; K15]; 1×Phospho [S11(100)]	634743290 1×Phospho [S1141(100)]	5.76e-05	6.55e-05	1	3	2	634743290; 90819233; 333108224	634743290 [1131-1145]	0	1975.01	S11(Phospho): 100	2.23	0.73	1.37	1.11	0.97	1.07							5.32088	High	1.3e-05	2.57e-05	27.19	High	2.27e-05	1	S11(Phospho): 100	S11;	634743290	NP_001278893.1	NVANQPPsPGGKSAY	No
HTT	3064	huntingtin [Homo sapiens]	S1201	EPGEQASVPLsPK	90903231	2×TMT6plex [N-Term; K13]; 1×Phospho [S11(100)]	90903231 1×Phospho [S1201(100)]	0.000193713	0.00012481	1	1	4	90903231	90903231 [1191-1203]	0	1876.98	S11(Phospho): 100	1.67	2.17	1.44	1.48	1.2	1.46	1.82	2.17	1.64	1.6	1.54	1.92	4.3948	High	2.03e-05	6.52e-05	40.09	High	5.72e-05	1	S11(Phospho): 100	S11;	90903231	NP_002102.4	EQASVPLsPKKGSEA	No
IRF2BP2	359948	interferon regulatory factor 2-binding protein 2 isoform A [Homo sapiens]	S175	LEEPPELNRQsPNPR	116734704	1×TMT6plex [N-Term]; 1×Deamidated [Q/N]; 1×Phospho [S11(100)]	116734704 1×Phospho [S175(100)]	0.0608312	0.00272093	1	2	6	116734706; 116734704	116734704 [165-179]	1	2086.02	S11(Phospho): 100	1.65	1.51	1.39	1.22	2.04	1.09							2.78999	High	0.0007112	0.01082	8.94	High	0.0009035	1	S11(Phospho): 100	S11;	116734704	NP_892017.2	PPELNRQsPNPRRGH	Yes
SCNM1	79005	sodium channel modifier 1 isoform 1 [Homo sapiens]	S219	WVKDENVEFDsDEEEPPDLPLD	13128998	2×TMT6plex [N-Term; K3]; 1×Deamidated [N6]; 1×Phospho [S11(100)]	13128998 1×Phospho [S219(100)]	0.000854962	0.000193352	1	2	2	325652026; 13128998	13128998 [209-230]	1	3156.42	S11(Phospho): 100	0.87	1.38	1.11	0.67	1.16	1.21							3.74499	High	5.93e-05	0.0002095	24.17	High	0.0001545	1	S11(Phospho): 100	S11;	13128998	NP_076946.1	DENVEFDsDEEEPPD	Yes
MAP1B	4131	microtubule-associated protein 1B [Homo sapiens]	S1298; S1312	VSAEAEVAPVsPEVTQEVVEEHCAsPEDK	153945728	2×TMT6plex [N-Term; K29]; 1×Deamidated [Q16]; 1×Carbamidomethyl [C23]; 2×Phospho [S11(100); S25(100)]	153945728 2×Phospho [S1298(100); S1312(100)]	0.00027207	0.000147488	1	1	9	153945728	153945728 [1288-1316]	0	3741.69	S11(Phospho): 100; S25(Phospho): 100	1.6	3.32	1.28	1.41	0.69	0.91	1.55	2.57	1.26	0.87	0.97	1.56	4.44241	High	2.03e-05	8.51e-05	20.37	High	7.92e-05	1	S11(Phospho): 100; S25(Phospho): 100	S11; S25;	153945728	NP_005900.2	EAEVAPVsPEVTQEV;VVEEHCAsPEDKTLE	Yes;Yes
SUGP1	57794	SURP and G-patch domain-containing protein 1 [Homo sapiens]	S485	AVQQHQHGYDsDEEVDSELGTWEHQLR	33469964	1×TMT6plex [N-Term]; 3×Deamidated [Q4; Q6; Q]; 1×Phospho [S11(98.1)]	33469964 1×Phospho [S485(98.1)]	8.88e-05	9e-05	1	1	4	33469964	33469964 [475-501]	0	3505.5	S11(Phospho): 98.09	1.29	1.97	1.39	1.47	1.99	1.39							5.95047	High	2.03e-05	3.51e-05	24.41	High	0.000139	1	S11(Phospho): 98.09	S11;	33469964	NP_757386.2	QHQHGYDsDEEVDSE	Yes
LMO7	4008	LIM domain only protein 7 isoform 1 [Homo sapiens]	S533	VTTEIQLPSQsPVEEQSPASLSSLR	33598968	1×TMT6plex [N-Term]; 3×Deamidated [Q6; Q10; Q16]; 1×Phospho [S11(98.5)]	33598968 1×Phospho [S533(98.5)]	0.000237746	0.000147488	1	3	3	33598968; 807045912; 221316634	33598968 [523-547]	0	2995.46	S11(Phospho): 98.48	1.91	1.74	1.27	2.01	1.35	1.7							4.43648	High	2.03e-05	7.57e-05	37.42	High	6.51e-05	1	S11(Phospho): 98.48	S11;	33598968	NP_005349.3	EIQLPSQsPVEEQSP	No
KIAA0754	643314	uncharacterized protein KIAA0754 [Homo sapiens]	S179	KESSSALTESsGHLDHR	149773456	2×TMT6plex [N-Term; K]; 1×Phospho [S11(99)]	149773456 1×Phospho [S179(99)]	0.000121468	9e-05	1	1	3	149773456	149773456 [169-185]	1	2379.17	S11(Phospho): 98.96	1.52	1.28	2.79	1.71	1.4	1.87							3.16653	High	7.18e-05	0.0002901	24.63	High	2.27e-05	1	S11(Phospho): 98.96	S11;	149773456	NP_055853.1	SSALTESsGHLDHRE	No
SHARPIN	81858	sharpin [Homo sapiens]	S165	GPPPEADLPRsPGNLTER	118918415	1×TMT6plex [N-Term]; 1×Phospho [S11(100)]	118918415 1×Phospho [S165(100)]	0.0991186	0.00458159	1	1	2	118918415	118918415 [155-172]	1	2212.1	S11(Phospho): 99.96	1.36	1.46	1.15	0.96	1.34	1.56	1.09	1.46	1.09	0.85	1.33	1.39	2.78075	High	0.001161	0.02023					S11(Phospho): 99.96	S11;	118918415	NP_112236.3	PEADLPRsPGNLTER	Yes
JPH2	57158	junctophilin-2 isoform 1 [Homo sapiens]	S486; T490	ETPRPEGGSPsPAGtPPQPK	21704281	2×TMT6plex [N-Term; K20]; 2×Phospho [S11(100); T15(100)]	21704281 2×Phospho [S486(100); T490(100)]	0.00199232	0.000261096	1	1	2	21704281	21704281 [476-495]	0	2605.25	S11(Phospho): 99.97; T15(Phospho): 100	0.95	2.05	0.66	1.03	0.61	0.78							2.90505	High	0.0001218	0.0008556	15.68	High	0.0001196	1	S11(Phospho): 99.97; T15(Phospho): 100	S11; T15;	21704281	NP_065166.2	RPEGGSPsPAGTPPQ;GSPSPAGtPPQPKRP	Yes;Yes
NUDT9	53343	ADP-ribose pyrophosphatase, mitochondrial isoform a precursor [Homo sapiens]	S121	WADPQISESNFsPK	13129010	2×TMT6plex [N-Term; K14]; 1×Phospho [S12(100)]	13129010 1×Phospho [S121(100)]	0.000438391	0.000193352	1	2	4	13129010; 37594457	13129010 [110-123]	0	2144.05	S12(Phospho): 100	1.64	1.83	1.48	1.26	1.91	1.59	1.05	1.27	0.93	1.06	1.57	1.2	3.62693	High	3.79e-05	0.0001267	37.62	High	8.36e-05	1	S12(Phospho): 100	S12;	13129010	NP_076952.1	QISESNFsPKFNEKD	Yes
ARHGAP27	201176	rho GTPase-activating protein 27 isoform d [Homo sapiens]	S466	SSQDGDTPAQAsPPEEK	533868710	2×TMT6plex [N-Term; K17]; 1×Phospho [S12(100)]	533868710 1×Phospho [S466(100)]	0.000308108	0.000147488	1	2	6	533868710; 40548322	533868710 [455-471]	0	2282.06	S12(Phospho): 100	1.59	2.01	1.02	1.8	1.44	1.71	1.11	1.26	1.06	1.26	1.63	1.29	4.64718	High	2.03e-05	9.48e-05	40.81	High	8.27e-05	1	S12(Phospho): 100	S12;	533868710	NP_001269219.1	GDTPAQAsPPEEKVP	Yes
TRIM33	51592	E3 ubiquitin-protein ligase TRIM33 isoform alpha [Homo sapiens]	S862	QSGLSSLVNGKsPIR	74027249	2×TMT6plex [N-Term; K11]; 1×Deamidated [N9]; 1×Phospho [S12(100)]	74027249 1×Phospho [S862(100)]	0.000440081	0.000193352	1	2	5	74027249; 74027251	74027249 [851-865]	1	2082.14	S12(Phospho): 100	1.46	1.11	1.36	1.03	1.65	1.41							4.48902	High	3.79e-05	0.0001269	6.24	High	0.0001505	1	S12(Phospho): 100	S12;	74027249	NP_056990.3	SSLVNGKsPIRSLMH	Yes
SUB1	10923	activated RNA polymerase II transcriptional coactivator p15 [Homo sapiens]	S17	ELVSSSSSGSDsDSEVDKK	217330646	3×TMT6plex [N-Term; K18; K19]; 1×Phospho [S12(100)]	217330646 1×Phospho [S17(100)]	0.000318939	0.000147488	1	1	11	217330646	217330646 [6-24]	1	2710.33	S12(Phospho): 100	1.41	0.89	1.87	1.07	2	1.69	1.39	0.84	1.97	0.98	2	1.87	4.44098	High	2.03e-05	9.78e-05	30.24	High	8.27e-05	1	S12(Phospho): 100	S12;	217330646	NP_006704.3	SSSSGSDsDSEVDKK	Yes
PGRMC2	10424	membrane-associated progesterone receptor component 2 [Homo sapiens]	S114	GLGAGAGAGEEsPATSLPR	291621647	1×TMT6plex [N-Term]; 1×Phospho [S12(100)]	291621647 1×Phospho [S114(100)]	4.27e-05	6.55e-05	1	1	9	291621647	291621647 [103-121]	0	2006.97	S12(Phospho): 100	1.21	1.42	1.48	1.34	1.51	1.48	0.82	0.99	0.88	0.83	0.83	0.94	7.54757	High	0	9.88e-06	61.01	High	1.91e-05	1	S12(Phospho): 100	S12;	291621647	NP_006311.2	GAGAGEEsPATSLPR	No
TNFRSF21	27242	tumor necrosis factor receptor superfamily member 21 precursor [Homo sapiens]	S541	LENSALLTVEPsPQDK	7657039	2×TMT6plex [N-Term; K16]; 1×Phospho [S12(100)]	7657039 1×Phospho [S541(100)]	5.4e-05	6.55e-05	1	1	7	7657039	7657039 [530-545]	0	2279.19	S12(Phospho): 100	1.18	1.78	1.04	2.04	1.89	1.14	1.26	1.6	1.23	2.24	2.48	1.21	5.16693	High	1.3e-05	2.43e-05	37.02	High	2.27e-05	1	S12(Phospho): 100	S12;	7657039	NP_055267.1	ALLTVEPsPQDKNKG	Yes
OTUD5	55593	OTU domain-containing protein 5 isoform a [Homo sapiens]	S165	QAPGVGAVGGGsPER	33457350	1×TMT6plex [N-Term]; 1×Phospho [S12(100)]	33457350 1×Phospho [S165(100)]	0.00548644	0.000453644	1	2	4	209977019; 33457350	33457350 [154-168]	0	1647.81	S12(Phospho): 100	1.11	1.14	1.37	1	1.16	1.29	0.87	0.87	1.05	0.89	0.85	0.97	3.02397	High	0.0001251	0.0009432	15.46	High	0.0002223	1	S12(Phospho): 100	S12;	33457350	NP_060072.1	VGAVGGGsPEREEVG	Yes
SCRIB	23513	protein scribble homolog isoform b [Homo sapiens]	S504	SEACPCQPDSGsPLPAEEEK	355390315	2×TMT6plex [N-Term; K20]; 2×Carbamidomethyl [C4; C6]; 1×Phospho [S12(100)]	355390315 1×Phospho [S504(100)]	6.97e-05	9e-05	1	2	4	355390313; 355390315	355390315 [493-512]	0	2726.21	S12(Phospho): 100	0.99	1.05	1.26	1.87	2.24	1.16	0.55	0.58	0.97	1.28	1.76	0.9	6.24309	High	2.03e-05	2.98e-05	58.14	High	2.27e-05	1	S12(Phospho): 100	S12;	355390315	NP_056171.3	PCQPDSGsPLPAEEE	Yes
C9orf78	51759	uncharacterized protein C9orf78 [Homo sapiens]	S261	VGDTEKPEPERsPPNR	7706557	2×TMT6plex [N-Term; K6]; 1×Phospho [S12(100)]	7706557 1×Phospho [S261(100)]	0.00125416	0.000214298	1	1	20	7706557	7706557 [250-265]	1	2346.19	S12(Phospho): 100	0.87	0.63	1.88	1.15	1.2	1.3	0.66	0.38	1.23	0.88	0.85	1.06	5.03968	High	0.0001288	0.001011	13.62	High	0.001978	1	S12(Phospho): 100	S12;	7706557	NP_057604.1	EKPEPERsPPNRKRP	Yes
HABP4	22927	intracellular hyaluronan-binding protein 4 [Homo sapiens]	S108	SLPAPVAQRPDsPGGGLQAPGQK	157676331	2×TMT6plex [N-Term; K23]; 1×Phospho [S12(100)]	157676331 1×Phospho [S108(100)]	4.27e-05	6.55e-05	1	1	16	157676331	157676331 [97-119]	0	2766.47	S12(Phospho): 100	0.79	1.29	2.14	1.04	0.77	1.16	0.97	1.6	2.73	1.14	0.86	1.65	8.60897	High	0	1.6e-05	29.01	High	5.72e-05	1	S12(Phospho): 100	S12;	157676331	NP_055097.2	PVAQRPDsPGGGLQA	Yes
ATRX	546	transcriptional regulator ATRX isoform 1 [Homo sapiens]	S677	RPTETNPVTSNsDEECNETVK	530788276	2×TMT6plex [N-Term; K21]; 1×Deamidated [N]; 1×Carbamidomethyl [C16]; 1×Phospho [S12(96.9)]	530788276 1×Phospho [S677(96.9)]	0.00330821	0.000383028	1	2	10	530788278; 530788276	530788276 [666-686]	0	2946.34	S12(Phospho): 96.86	1.87	1.78	1.94	1.18	1.91	1.91							2.47016	High	0.0001218	0.0006079	6.88	High	0.0002332	1	S12(Phospho): 96.86	S12;	530788276	NP_000480.3	TNPVTSNsDEECNET	Yes
ACACA	31	acetyl-CoA carboxylase 1 isoform 1 [Homo sapiens]	S1296; S1300	IFDEVMGCFSDsPPQsPTFPEAGHTSLYDEDK	38679960	2×TMT6plex [N-Term; K32]; 1×Carbamidomethyl [C8]; 2×Phospho [S12(97.7); S16(97.7)]	38679960 2×Phospho [S1296(97.7); S1300(97.7)]	4.27e-05	6.55e-05	1	4	13	38679974; 38679977; 38679960; 38679971	38679960 [1285-1316]	0	4221.82	S12(Phospho): 97.73; S16(Phospho): 97.73	1.62	1.4	1.91	1.06	2.01	1.07	1.72	1.72	2.36	1.56	2.24	1.9	7.05833	High	0	1.35e-05	39.35	High	1.91e-05	1	S12(Phospho): 97.73; S16(Phospho): 97.73	S12; S16;	38679960	NP_942131.1	VMGCFSDsPPQSPTF;FSDSPPQsPTFPEAG	No;No
ATRX	546	transcriptional regulator ATRX isoform 1 [Homo sapiens]	S677	RPTETNPVTSNsDEECNETVK	530788276	2×TMT6plex [N-Term; K21]; 1×Carbamidomethyl [C16]; 1×Phospho [S12(98.6)]	530788276 1×Phospho [S677(98.6)]	0.000135806	9e-05	1	2	16	530788278; 530788276	530788276 [666-686]	0	2945.36	S12(Phospho): 98.62	1.21	1.11	1.41	1	1.07	1.07	0.65	0.58	0.78	0.41	0.78	0.52	4.85741	High	2.03e-05	5.36e-05	36.19	High	7.72e-05	1	S12(Phospho): 98.62	S12;	530788276	NP_000480.3	TNPVTSNsDEECNET	Yes
PROSER2	254427	proline and serine-rich protein 2 [Homo sapiens]	S18	KSDASDMNSDTsPSCR	223633935	2×TMT6plex [N-Term; K]; 1×Carbamidomethyl [C15]; 1×Phospho [S12(99.1)]	223633935 1×Phospho [S18(99.1)]	8.07e-05	9e-05	1	1	14	223633935	223633935 [7-22]	1	2296	S12(Phospho): 99.08	0.66	0.57	1.08	1.05	1.28	2.45	0.33	0.59	0.93	1.28	1.4	2.68	5.65787	High	2.03e-05	3.3e-05	22.58	High	7.72e-05	1	S12(Phospho): 99.08	S12;	223633935	NP_694988.3	SDMNSDTsPSCRLRA	Yes
HUWE1	10075	E3 ubiquitin-protein ligase HUWE1 [Homo sapiens]	S3816	REESPMDVDQPsPSAQDTQSIASDGTPQGEK	61676188	2×TMT6plex [N-Term; K31]; 2×Deamidated [Q16; Q19]; 1×Phospho [S12(99.8)]	61676188 1×Phospho [S3816(99.8)]	0.0117365	0.000778694	1	1	9	61676188	61676188 [3805-3835]	1	3827.72	S12(Phospho): 99.84	0.67	1.51	2.06	1.09	1.56	0.99							3.07856	High	0.0002421	0.002673	14.29	High	0.00195	1	S12(Phospho): 99.84	S12;	61676188	NP_113584.3	PMDVDQPsPSAQDTQ	Yes
KRT13	3860	keratin, type I cytoskeletal 13 isoform a [Homo sapiens]	S427	MIGFPSSAGSVsPR	131412225	1×TMT6plex [N-Term]; 1×Phospho [S12(100)]	131412225 1×Phospho [S427(100)]	4.98e-05	6.55e-05	1	1	105	131412225	131412225 [416-429]	0	1701.82	S12(Phospho): 99.99	1.06	0.92	1.14	1.13	8.42	0.93	1.17	1.08	1.25	1.07	6.16	1.05	5.84424	High	1.3e-05	2.24e-05	71.87	High	5.72e-05	1	S12(Phospho): 99.99	S12;	131412225	NP_705694.2	PSSAGSVsPRSTSVT	Yes
SUV39H2	79723	histone-lysine N-methyltransferase SUV39H2 isoform 1 [Homo sapiens]	S388	GSGDISSDSIDHsPAK	301171588	2×TMT6plex [N-Term; K16]; 1×Phospho [S13(100)]	301171588 1×Phospho [S388(100)]	0.000130327	9e-05	1	4	8	301171613; 301171605; 13375930; 301171588	301171588 [376-391]	0	2111.01	S13(Phospho): 100	2.16	1.65	1.23	1.12	1.13	1.15	3.3	2.22	1.49	1.08	1.61	1.36	5.21482	High	2.03e-05	4.58e-05	21.93	High	7.92e-05	1	S13(Phospho): 100	S13;	301171588	NP_001180353.1	SSDSIDHsPAKKRVR	Yes
NUCKS1	64710	nuclear ubiquitous casein and cyclin-dependent kinase substrate 1 [Homo sapiens]	S214	TPSPKEEDEEPEsPPEK	56118310	3×TMT6plex [N-Term; K5; K17]; 1×Phospho [S13(100)]	56118310 1×Phospho [S214(100)]	0.00020662	0.00012481	1	1	26	56118310	56118310 [202-218]	1	2692.32	S13(Phospho): 100	0.88	0.67	1.25	1.2	2.55	1.64	1.09	1.3	1.21	1.21	2.36	1.46	4.54872	High	5.25e-05	0.0001407	27.76	High	6.51e-05	1	S13(Phospho): 100	S13;	56118310	NP_073568.2	EEDEEPEsPPEKKTS	Yes
RNF4	6047	E3 ubiquitin-protein ligase RNF4 isoform 1 [Homo sapiens]	S94; S95	RLPQDHADSCVVssDDEELSR	297139777	1×TMT6plex [N-Term]; 1×Carbamidomethyl [C10]; 2×Phospho [S13(100); S14(100)]	297139777 2×Phospho [S94(100); S95(100)]	6.1e-05	6.55e-05	1	1	6	297139777	297139777 [82-102]	1	2804.18	S13(Phospho): 100; S14(Phospho): 100	2.29	1.72	1.48	1.15	1.25	1.19	2.4	1.28	1.17	0.53	1.2	1.02	5.8154	High	1.3e-05	2.9e-05	27.98	High	6.51e-05	1	S13(Phospho): 100; S14(Phospho): 100	S13; S14;	297139777	NP_001171938.1	HADSCVVsSDDEELS;ADSCVVSsDDEELSR	Yes;Yes
MDC1	9656	mediator of DNA damage checkpoint protein 1 [Homo sapiens]	S1775	AAESLTAIPEPAsPQLLETPIHASQIQK	132626688	2×TMT6plex [N-Term; K28]; 2×Deamidated [Q15; Q25]; 1×Phospho [S13(99.9)]	132626688 1×Phospho [S1775(99.9)]	0.000339749	0.000147488	1	1	4	132626688	132626688 [1763-1790]	0	3480.83	S13(Phospho): 99.94	1.72	2.28	1.42	1.03	1.12	0.97	1.99	1.54	1.2	1.03	1.26	1.44	4.86449	High	2.62e-05	0.000103	13.67	High	0.0001264	1	S13(Phospho): 99.94	S13;	132626688	NP_055456.2	TAIPEPAsPQLLETP	Yes
SIRT6	51548	NAD-dependent protein deacetylase sirtuin-6 isoform 1 [Homo sapiens]	S330	QEPCAQHNGSEPAsPKR	300797577	2×TMT6plex [N-Term; K16]; 1×Deamidated [N8]; 1×Carbamidomethyl [C4]; 1×Phospho [S14(100)]	300797577 1×Phospho [S330(100)]	0.000504973	0.000193352	1	2	4	300797577; 300797597	300797577 [317-333]	1	2432.14	S14(Phospho): 100	2.82	1.26	0.92	1.19	1.39	1.03							4.34002	High	5.25e-05	0.0001413	16.07	High	0.0002407	1	S14(Phospho): 100	S14;	300797577	NP_057623.2	HNGSEPAsPKRERPT	Yes
MAP1B	4131	microtubule-associated protein 1B [Homo sapiens]	S1154	DVMSDETNNEETEsPSQEFVNITK	153945728	2×TMT6plex [N-Term; K24]; 1×Phospho [S14(100)]	153945728 1×Phospho [S1154(100)]	4.27e-05	6.55e-05	1	1	89	153945728	153945728 [1141-1164]	0	3281.48	S14(Phospho): 100	1.6	4.63	1.82	1.17	0.94	1.4	2.87	8.35	3.01	1.21	1.25	1.76	6.4534	High	1.3e-05	1.89e-05	95.9	High	1.91e-05	1	S14(Phospho): 100	S14;	153945728	NP_005900.2	TNNEETEsPSQEFVN	Yes
MYO9B	4650	unconventional myosin-IXb isoform 1 [Homo sapiens]	S1405	KPGDASSLPDAGLsPGSQVDSK	33356170	3×TMT6plex [N-Term; K22; K]; 1×Phospho [S14(100)]	33356170 1×Phospho [S1405(100)]	4.31e-05	6.55e-05	1	2	6	194272142; 33356170	33356170 [1392-1413]	0	2880.5	S14(Phospho): 100	1.53	2.36	1.29	1.17	1.07	1.43	1.12	1.94	0.99	0.87	0.94	1.21	7.80541	High	0	1.75e-05	44.34	High	2.27e-05	1	S14(Phospho): 100	S14;	33356170	NP_004136.2	SLPDAGLsPGSQVDS	Yes
PDS5B	23047	sister chromatid cohesion protein PDS5 homolog B [Homo sapiens]	S1283	LKEDILENEDEQNsPPK	7657269	3×TMT6plex [N-Term; K2; K17]; 1×Phospho [S14(100)]	7657269 1×Phospho [S1283(100)]	8.83e-05	9e-05	1	1	4	7657269	7657269 [1270-1286]	1	2765.42	S14(Phospho): 100	1.14	1.39	1.53	1.42	1.89	1.53							5.82627	High	2.03e-05	3.5e-05	46.41	High	5.72e-05	1	S14(Phospho): 100	S14;	7657269	NP_055847.1	ENEDEQNsPPKKGKR	Yes
MYO18A	399687	unconventional myosin-XVIIIa isoform a [Homo sapiens]	S1942	IGDLQAAIEDEMEsDENEDLINSLQDMVTK	28416946	2×TMT6plex [N-Term; K30]; 3×Deamidated [N22; Q/N]; 1×Phospho [S14(96.5)]	28416946 1×Phospho [S1942(96.5)]	0.00711462	0.000523051	1	1	8	28416946	28416946 [1929-1958]	0	3906.77	S14(Phospho): 91.33	1.89	1.87	1.15	2.33	1.41	1.74	0.6	1.51	1.01	1.41	0.56	1.46	3.19964	High	0.0003231	0.003416	19.22	High	0.0001716	1	S14(Phospho): 91.33	S14;	28416946	NP_510880.2	AIEDEMEsDENEDLI	Yes
CDKN3	1033	cyclin-dependent kinase inhibitor 3 isoform 1 [Homo sapiens]	S14; S15	MKPPSSIQTSEFDssDEEPIEDEQTPIHISWLSLSR	17981704	2×TMT6plex [N-Term; K2]; 2×Deamidated [Q8; Q24]; 2×Phospho [S14(95); S15(95)]	17981704 2×Phospho [S14(95); S15(95)]	0.0256008	0.00142067	1	1	2	17981704	17981704 [1-36]	0	4736.17	S14(Phospho): 95.01; S15(Phospho): 95.01	1.26	1.71	1.12	2.29	1.23	1.58							2.60248	High	0.0003576	0.004273	5.75	High	0.0003411	1	S14(Phospho): 95.01; S15(Phospho): 95.01	S14; S15;	17981704	NP_005183.2	IQTSEFDsSDEEPIE;QTSEFDSsDEEPIED	Yes;Yes
ATXN2L	11273	ataxin-2-like protein isoform C [Homo sapiens]	S396	GPHHLDNSSPGPGsEAR	27262649	1×TMT6plex [N-Term]; 1×Phospho [S9(98.9)]	27262649 1×Phospho [S391(98.9)]	6.13e-05	6.55e-05	1	7	21	27262645; 27262649; 27262653; 815891099; 27262647; 27262651; 383792189	27262649 [383-399]	0	2023.92	S14(Phospho): 98.99	1.67	2.24	1.21	1.02	1.18	1.24	1.81	2.38	1.26	1.26	1.3	1.6	4.14796	High	2.03e-05	3.77e-05	35.87	High	3.2e-05	1	S14(Phospho): 98.99	S14;	27262649	NP_680780.1	NSSPGPGsEARGING	Yes
ICE1	23379	little elongation complex subunit 1 [Homo sapiens]	S255	VPGEDGTLPPTQGsPLR	149363685	1×TMT6plex [N-Term]; 1×Phospho [S14(99)]	149363685 1×Phospho [S255(99)]	0.00019039	0.00012481	1	1	6	149363685	149363685 [242-258]	0	2030.02	S14(Phospho): 99	1.57	1.11	1.38	1.96	1.39	1.42	1.63	1.7	1.3	2.13	1.88	2.03	5.10021	High	2.03e-05	6.23e-05	21.92	High	8.36e-05	1	S14(Phospho): 99	S14;	149363685	NP_056140.1	TLPPTQGsPLRTSNV	Yes
ICE1	23379	little elongation complex subunit 1 [Homo sapiens]	S255	VPGEDGTLPPTQGsPLR	149363685	1×TMT6plex [N-Term]; 1×Deamidated [Q12]; 1×Phospho [S14(100)]	149363685 1×Phospho [S255(100)]	0.00408279	0.000383028	1	1	2	149363685	149363685 [242-258]	0	2031	S14(Phospho): 99.99	1.36	1.31	1.35	1.88	1.29	1.64							3.25891	High	0.0001912	0.001654	18.55	High	0.0001583	1	S14(Phospho): 99.99	S14;	149363685	NP_056140.1	TLPPTQGsPLRTSNV	Yes
MAP1B	4131	microtubule-associated protein 1B [Homo sapiens]	S1389	ASVSPMDEPVPDSEsPIEK	153945728	2×TMT6plex [N-Term; K19]; 1×Phospho [S4(100)]	153945728 1×Phospho [S1378(100)]	7.64e-05	9e-05	1	1	49	153945728	153945728 [1375-1393]	0	2552.22	S15(Phospho): 100	1.58	3.43	1.52	1.12	0.99	1.2	2.04	4.82	1.82	1.09	1.01	1.33	6.34742	High	2.03e-05	3.91e-05	55.94	High	2.27e-05	1	S15(Phospho): 100	S15;	153945728	NP_005900.2	EPVPDSEsPIEKVLS	Yes
ABLIM3	22885	actin-binding LIM protein 3 isoform 1 [Homo sapiens]	S567	EALHTAGYEMSLNGsPR	666335609	1×TMT6plex [N-Term]; 1×Deamidated [N13]; 1×Phospho [S15(100)]	666335609 1×Phospho [S567(100)]	4.96e-05	6.55e-05	1	4	7	666335558; 666335582; 666335564; 666335609	666335609 [553-569]	0	2142.97	S15(Phospho): 100	1.38	2.06	1.15	1.28	1.17	1.46	1.31	1.54	1.28	1.34	1.21	1.12	6.49604	High	1.3e-05	2.23e-05	50.32	High	2.27e-05	1	S15(Phospho): 100	S15;	666335609	NP_001287944.1	YEMSLNGsPRSHYLA	Yes
TOP2B	7155	DNA topoisomerase 2-beta [Homo sapiens]	S1408	ASPITNDGEDEFVPsDGLDKDEYTFSPGK	19913408	3×TMT6plex [N-Term; K20; K29]; 1×Phospho [S15(100)]	19913408 1×Phospho [S1408(100)]	4.27e-05	6.55e-05	1	1	17	19913408	19913408 [1394-1422]	1	3897.86	S15(Phospho): 100	1.35	1.47	1.53	1.49	2.36	1.89	0.88	1.1	1.22	1.2	1.3	0.77	7.81862	High	0	8e-06	49.63	High	1.91e-05	1	S15(Phospho): 100	S15;	19913408	NP_001059.2	GEDEFVPsDGLDKDE	No
SLC12A7	10723	solute carrier family 12 member 7 [Homo sapiens]	S62	ENSPFLNNVEVEQEsFFEGK	123701900	2×TMT6plex [N-Term; K20]; 1×Deamidated [Q/N]; 1×Phospho [S3(100)]	123701900 1×Phospho [S50(100)]	0.000462843	0.000193352	1	1	5	123701900	123701900 [48-67]	0	2882.35	S15(Phospho): 100	0.84	1.15	2.09	1.07	1.17	1.08							3.81998	High	5.25e-05	0.0001418	30.25	High	7.92e-05	1	S15(Phospho): 100	S15;	123701900	NP_006589.2	NVEVEQEsFFEGKNM	Yes
TCF20	6942	transcription factor 20 isoform 1 [Homo sapiens]	S640	GSQEDDPAATQRPPsNGGAK	31652244	2×TMT6plex [N-Term; K20]; 1×Deamidated [N/Q]; 1×Phospho [S15(100)]	31652244 1×Phospho [S640(100)]	0.000122029	9e-05	1	2	15	31652242; 31652244	31652244 [626-645]	0	2522.19	S15(Phospho): 98.72	1.26	2.83	1.3	0.76	1.43	1.55	1.32	1.72	1.2	0.99	1.29	1.38	5.03724	High	2.03e-05	4.36e-05	23.61	High	6.51e-05	1	S15(Phospho): 98.72	S15;	31652244	NP_005641.1	AATQRPPsNGGAKET	Yes
SH3BP4	23677	SH3 domain-binding protein 4 [Homo sapiens]	S131	NSTLSDSGMIDNLPDsPDEVAK	7657562	2×TMT6plex [N-Term; K22]; 1×Deamidated [N1]; 1×Phospho [S16(100)]	7657562 1×Phospho [S131(100)]	9.5e-05	9e-05	1	1	4	7657562	7657562 [116-137]	0	2844.33	S16(Phospho): 100	1.13	2.34	1.1	0.98	0.95	1	0.95	1.71	1.12	0.77	1.07	0.89	5.0532	High	2.03e-05	3.66e-05	48.68	High	5.72e-05	1	S16(Phospho): 100	S16;	7657562	NP_055336.1	MIDNLPDsPDEVAKE	Yes
THOP1	7064	thimet oligopeptidase [Homo sapiens]	S16	MKPPAACAGDMADAAsPCSVVNDLR	4507491	2×TMT6plex [N-Term; K2]; 2×Carbamidomethyl [C7; C18]; 1×Phospho [S16(100)]	4507491 1×Phospho [S16(100)]	4.37e-05	6.55e-05	1	1	6	4507491	4507491 [1-25]	0	3142.46	S16(Phospho): 100	0.54	0.88	0.84	0.89	1.54	1.36	0.8	0.64	1.04	0.74	1.51	1.26	6.05138	High	1.3e-05	1.87e-05	56.79	High	1.91e-05	1	S16(Phospho): 100	S16;	4507491	NP_003240.1	GDMADAAsPCSVVND	Yes
C2CD5	9847	C2 domain-containing protein 5 isoform a [Homo sapiens]	S643	ELYEINPPEISEEIIGsPIPEPR	555290077	1×TMT6plex [N-Term]; 1×Phospho [S17(100)]	555290077 1×Phospho [S643(100)]	0.000494975	0.000193352	1	5	7	29789060; 555290099; 555290021; 555290077; 555290101	555290077 [627-649]	0	2930.46	S17(Phospho): 100	2.3	1.09	1.19	0.98	1.88	1.04	0.8	1.29	1.01	0.84	0.58	0.91	4.08913	High	5.93e-05	0.0001956	27.59	High	0.0001196	1	S17(Phospho): 100	S17;	555290077	NP_001273103.1	ISEEIIGsPIPEPRQ	Yes
SNTB1	6641	beta-1-syntrophin [Homo sapiens]	S87	GAGAGHPGAGGAQPPDsPAGVR	11321640	1×TMT6plex [N-Term]; 1×Phospho [S17(100)]	11321640 1×Phospho [S87(100)]	4.28e-05	6.55e-05	1	1	8	11321640	11321640 [71-92]	0	2193.04	S17(Phospho): 100	2.25	2	1.06	0.96	1.06	1.02	2.39	1.85	1.05	0.91	1.06	0.93	7.21941	High	0	1.63e-05	46.08	High	1.91e-05	1	S17(Phospho): 100	S17;	11321640	NP_066301.1	GGAQPPDsPAGVRTA	Yes
SNTB1	6641	beta-1-syntrophin [Homo sapiens]	S219	KGSPVSEIGWETPPPEsPR	11321640	2×TMT6plex [N-Term; K]; 1×Phospho [S17(100)]	11321640 1×Phospho [S219(100)]	0.0029856	0.00036439	1	1	4	11321640	11321640 [203-221]	1	2588.32	S17(Phospho): 100	2.11	1.08	0.68	0.92	0.58	0.82	1.33	1.46	0.84	0.61	0.92	0.82	2.77354	High	0.0001218	0.0005572	10.42	High	0.0001716	1	S17(Phospho): 100	S17;	11321640	NP_066301.1	WETPPPEsPRLGGST	Yes
DNMT1	1786	DNA (cytosine-5)-methyltransferase 1 isoform b [Homo sapiens]	S714	EADDDEEVDDNIPEMPsPK	4503351	2×TMT6plex [N-Term; K19]; 1×Oxidation [M15]; 1×Phospho [S17(100)]	4503351 1×Phospho [S714(100)]	5.16e-05	6.55e-05	1	2	12	4503351; 195927037	4503351 [698-716]	0	2699.17	S17(Phospho): 100	1.92	1.63	1.55	1.23	1.69	1.61	1.29	1.13	1.22	1.03	1.3	1.41	5.36106	High	1.3e-05	2.32e-05	37.98	High	2.27e-05	1	S17(Phospho): 100	S17;	4503351	NP_001370.1	DNIPEMPsPKKMHQG	Yes
CCNL1	57018	cyclin-L1 isoform 1 [Homo sapiens]	S335; S342	GLNPDGTPALSTLGGFsPASKPSsPR	9945320	2×TMT6plex [N-Term; K21]; 2×Phospho [S17(100); S24(96.7)]	9945320 2×Phospho [S335(100); S342(96.7)]	5.05e-05	6.55e-05	1	2	21	815891011; 9945320	9945320 [319-344]	0	3129.54	S17(Phospho): 100; S24(Phospho): 98.47	2.07	1.81	0.88	1.21	1.52	0.89	1.6	1.31	0.83	1.07	1.39	1.13	7.79608	High	1.3e-05	2.82e-05	39.65	High	7.11e-05	1	S17(Phospho): 100; S24(Phospho): 98.47	S17; S24;	9945320	NP_064703.1	LSTLGGFsPASKPSS;SPASKPSsPREVKAE	Yes;Yes
NF1	4763	neurofibromin isoform 1 [Homo sapiens]	S2515	GSEGYLAATYPTVGQTsPR	109826564	1×TMT6plex [N-Term]; 1×Phospho [S17(100)]	109826564 1×Phospho [S2515(100)]	0.000189844	0.00012481	1	2	9	4557793; 109826564	109826564 [2499-2517]	0	2264.08	S17(Phospho): 98.59	1.78	2.46	1.06	1.42	1.11	1.1	1.46	2.23	1.14	1.84	0.95	1.65	4.30105	High	2.03e-05	6.22e-05	13.22	High	0.0001301	1	S17(Phospho): 98.59	S17;	109826564	NP_001035957.1	YPTVGQTsPRARKSM	Yes
MDC1	9656	mediator of DNA damage checkpoint protein 1 [Homo sapiens]	S376	GPGAPGLAHLQESQAGsDTDVEEGKAPQAVPLEK	132626688	3×TMT6plex [N-Term; K25; K34]; 1×Deamidated [Q]; 1×Phospho [S17(99.9)]	132626688 1×Phospho [S376(99.9)]	6.16e-05	6.55e-05	1	1	13	132626688	132626688 [360-393]	1	4152.11	S17(Phospho): 99.94	3.15	1.88	1.07	0.78	1.17	1.06							5.72565	High	1.3e-05	2.71e-05	26.7	High	2.27e-05	1	S17(Phospho): 99.94	S17;	132626688	NP_055456.2	LQESQAGsDTDVEEG	Yes
ZNF217	7764	zinc finger protein 217 [Homo sapiens]	S662	ADVTPPPDGSTTHNLEVsPK	5730124	2×TMT6plex [N-Term; K20]; 1×Phospho [S18(100)]	5730124 1×Phospho [S662(100)]	8.35e-05	9e-05	1	1	8	5730124	5730124 [645-664]	0	2600.3	S18(Phospho): 100	1.72	1.4	1.86	1.33	1.99	2.46	1.25	1.11	1.38	1.06	1.12	1.56	5.74592	High	2.03e-05	3.37e-05	32.08	High	2.27e-05	1	S18(Phospho): 100	S18;	5730124	NP_006517.1	TTHNLEVsPKEKQTE	Yes
TFEB	7942	transcription factor EB isoform 2 [Homo sapiens]	S437	EDEGPPGYPEPLAPGHGsPFPSLSK	429836865	2×TMT6plex [N-Term; K25]; 1×Phospho [S18(100)]	429836865 1×Phospho [S437(100)]	0.000104433	9e-05	1	3	5	429836865; 429836867; 429836869	429836865 [420-444]	0	3100.51	S18(Phospho): 99.98	1.22	1.43	1.72	1.82	2.88	1.45	1.54	1.7	1.26	1.9	2.21	1.16	5.45672	High	2.03e-05	3.9e-05	30.28	High	6.51e-05	1	S18(Phospho): 99.98	S18;	429836865	NP_001161299.2	PLAPGHGsPFPSLSK	No
NCOR2	9612	nuclear receptor corepressor 2 isoform 1 [Homo sapiens]	S215	QQQLEEEAAKPPEPEKPVsPPPIESK	331284178	4×TMT6plex [N-Term; K10; K16; K26]; 1×Phospho [S19(100)]	331284178 1×Phospho [S215(100)]	0.000735865	0.000193352	1	3	2	331284176; 331284180; 331284178	331284178 [197-222]	0	3879.1	S19(Phospho): 100	1.24	1.51	1.39	1.48	2.98	1.37	0.82	0.84	1.06	1.53	2.55	1.1	4.48521	High	5.93e-05	0.0002226					S19(Phospho): 100	S19;	331284178	NP_006303.4	PEPEKPVsPPPIESK	Yes
DDX21	9188	nucleolar RNA helicase 2 isoform 1 [Homo sapiens]	S168; S173	LKNGFPHPEPDCNPSEAAsEESNsEIEQEIPVEQK	50659095	3×TMT6plex [N-Term; K2; K35]; 1×Deamidated [N3]; 1×Carbamidomethyl [C12]; 2×Phospho [S24(98.3); S]	50659095 2×Phospho [S173(98.3); S]	5.35e-05	6.55e-05	1	2	13	50659095; 379317177	50659095 [150-184]	1	4784.19	S19(Phospho): 97.1; S24(Phospho): 97.1	1.53	1.57	1.16	0.6	2	1.64	2.52	1.82	1.16	1.28	2.05	1.78	6.79392	High	1.3e-05	2.42e-05	33.83	High	6.51e-05	1	S19(Phospho): 97.1; S24(Phospho): 97.1	S19; S24;	50659095	NP_004719.2	CNPSEAAsEESNSEI;AASEESNsEIEQEIP	Yes;Yes
CAD	790	CAD protein isoform 1 [Homo sapiens]	S1859	AsDPGLPAEEPK	18105007	2×TMT6plex [N-Term; K12]; 1×Phospho [S2(100)]	18105007 1×Phospho [S1859(100)]	0.000441779	0.000193352	1	2	15	18105007; 807045910	18105007 [1858-1869]	0	1748.89	S2(Phospho): 100	2.23	2	1.49	1.81	1.69	1.65	2.35	1.94	1.52	1.86	1.89	1.64	4.33485	High	5.93e-05	0.0002484	28.59	High	0.0001716	1	S2(Phospho): 100	S2;	18105007	NP_004332.2	PPRIHRAsDPGLPAE	Yes
C5orf24	134553	UPF0461 protein C5orf24 isoform 1 [Homo sapiens]	S137	VsPGRPPGSIK	40255111	2×TMT6plex [N-Term; K11]; 1×Phospho [S2(100)]	40255111 1×Phospho [S137(100)]	0.00821078	0.000595922	1	1	1	40255111	40255111 [136-146]	0	1632.92	S2(Phospho): 100	1.8	1.41	1.7	1.24	1.48	1.38							2.67691	High	0.0001603	0.001371					S2(Phospho): 100	S2;	40255111	NP_689622.2	KAAGYKVsPGRPPGS	Yes
BPTF	2186	nucleosome-remodeling factor subunit BPTF isoform 2 [Homo sapiens]	S2370	LsPQMQVHQDK	38788260	2×TMT6plex [N-Term; K11]; 1×Phospho [S2(100)]	38788260 1×Phospho [S2370(100)]	0.00244421	0.000314125	1	2	2	38788260; 38788274	38788260 [2369-2379]	0	1848.94	S2(Phospho): 100	1.8	1.53	1.72	1.67	2.01	1.57							3.65053	High	9.7e-05	0.000474	9.84	High	0.0004982	1	S2(Phospho): 100	S2;	38788260	NP_004450.3	EQRQSKLsPQMQVHQ	Yes
RRP1B	23076	ribosomal RNA processing protein 1 homolog B [Homo sapiens]	S513	GsPTGGAQLLK	57863269	2×TMT6plex [N-Term; K11]; 1×Phospho [S2(100)]	57863269 1×Phospho [S513(100)]	0.000457456	0.000193352	1	1	12	57863269	57863269 [512-522]	0	1566.87	S2(Phospho): 100	1.61	1.12	1.6	1.12	1.52	1.5	1.37	1.27	1.81	1.45	1.61	1.46	4.13545	High	4.98e-05	0.0001309	28.59	High	0.0001301	1	S2(Phospho): 100	S2;	57863269	NP_055871.1	HPQGPRGsPTGGAQL	Yes
PMS2	5395	mismatch repair endonuclease PMS2 isoform a [Homo sapiens]	S445	RsPLGQK	4505913	2×TMT6plex [N-Term; K7]; 1×Phospho [S2(100)]	4505913 1×Phospho [S445(100)]	0.100646	0.00477916	1	1	6	4505913	4505913 [444-450]	1	1323.76	S2(Phospho): 100	1.41	0.87	1.65	1.19	1.36	1.34							3.11031	High	0.00813	0.1749	15.73	High	0.00239	1	S2(Phospho): 100	S2;	4505913	NP_000526.1	KTPEPRRsPLGQKRG	Yes
PPP1R18	170954	phostensin [Homo sapiens]	S224	LsPGESAYQK	199559805	2×TMT6plex [N-Term; K10]; 1×Deamidated [Q9]; 1×Phospho [S2(100)]	199559805 1×Phospho [S224(100)]	0.00552255	0.000453644	1	1	2	199559805	199559805 [223-232]	0	1618.81	S2(Phospho): 100	1.37	2.21	1.31	0.92	0.78	1.85							3.38051	High	0.0001251	0.0009458	24.39	High	0.0006089	1	S2(Phospho): 100	S2;	199559805	NP_001128342.1	KEVESRLsPGESAYQ	Yes
DOCK5	80005	dedicator of cytokinesis protein 5 [Homo sapiens]	S1834	NsTELAPPLPVR	117553586	1×TMT6plex [N-Term]; 1×Phospho [S2(100)]	117553586 1×Phospho [S1834(100)]	0.00504063	0.000429788	1	1	2	117553586	117553586 [1833-1844]	0	1602.85	S2(Phospho): 100	1.24	1.39	0.9	2.62	1.14	1.77							3.16751	High	0.0001218	0.0008719	11.87	High	0.0009592	1	S2(Phospho): 100	S2;	117553586	NP_079216.4	YEGSQRNsTELAPPL	Yes
HCLS1	3059	hematopoietic lineage cell-specific protein isoform 1 [Homo sapiens]	S275	RsPEAPQPVIAMEEPAVPAPLPK	167234422	2×TMT6plex [N-Term; K23]; 1×Phospho [S2(100)]	167234422 1×Phospho [S275(100)]	4.57e-05	6.55e-05	1	2	6	167234422; 635574580	167234422 [274-296]	1	2962.59	S2(Phospho): 100	1.1	1.45	1.18	6.61	1.48	1.56							6.1296	High	1.3e-05	2.02e-05	25.71	High	2.27e-05	1	S2(Phospho): 100	S2;	167234422	NP_005326.2	RKAVTKRsPEAPQPV	Yes
SEC16A	9919	protein transport protein Sec16A isoform 1 [Homo sapiens]	S534	LsGSARPQELVGTFIQQEVGKPEDEASGSFFK	124378039	3×TMT6plex [N-Term; K21; K32]; 3×Deamidated [Q8; Q16; Q17]; 1×Phospho [S2(91.8)]	124378039 1×Phospho [S534(91.8)]	0.0932214	0.0042658	1	2	1	449083351; 124378039	124378039 [533-564]	0	4209.12	S2(Phospho): 91.8	1.07	0.9	1.54	1.55	1.88	1.4							2.9841	High	0.0009918	0.01712					S2(Phospho): 91.8	S2;	124378039	NP_055681.1	SRSHGRLsGSARPQE	Yes
INF2	64423	inverted formin-2 isoform 1 [Homo sapiens]	S1076	RsSWYVDASDVLTTEDPQCPQPLEGAWPVTLGDAQALKPLK	149999380	3×TMT6plex [N-Term; K38; K41]; 1×Carbamidomethyl [C19]; 1×Phospho [S2(97.3)]	149999380 1×Phospho [S1076(97.3)]	5.12e-05	6.55e-05	1	2	3	149999378; 149999380	149999380 [1075-1115]	1	5306.71	S2(Phospho): 97.32	0.74	0.87	0.69	1.99	0.97	1.81							8.39832	High	1.3e-05	2.31e-05	19.02	High	3.2e-05	1	S2(Phospho): 97.32	S2;	149999380	NP_071934.3	PRPLERRsSWYVDAS	Yes
OCIAD1	54940	OCIA domain-containing protein 1 isoform 4 [Homo sapiens]	S128	SsPPGHYYQK	269914128	2×TMT6plex [N-Term; K10]; 1×Phospho [S2(99.4)]	269914128 1×Phospho [S128(99.4)]	0.000697796	0.000193352	1	4	12	119874207; 119874209; 8923427; 269914128	269914128 [127-136]	0	1701.84	S2(Phospho): 99.44	1.13	1.17	1.17	1.78	2.58	1.51	0.77	0.85	1.05	1.98	3.23	1.45	4.70401	High	5.93e-05	0.0001799	36.26	High	8.36e-05	1	S2(Phospho): 99.44	S2;	269914128	NP_001161726.1	SGQARRSsPPGHYYQ	No
SORBS1	10580	sorbin and SH3 domain-containing protein 1 isoform 3 [Homo sapiens]	S465	YsFSEDTK	78000163	2×TMT6plex [N-Term; K8]; 1×Phospho [S2(100)]	78000163 1×Phospho [S465(100)]	0.118036	0.00578875	1	12	1	594140585; 78000163; 78000171; 594140581; 78000167; 78000169; 594140579; 78000165; 594140583; 594140587; 7661700; 78000160	78000163 [464-471]	0	1514.72	S2(Phospho): 99.99	0.78	0.82	2.17	1.11	1.06	1.98							2.25785	High	0.001275	0.02238					S2(Phospho): 99.99	S2;	78000163	NP_001030126.1	DLYSPRYsFSEDTKS	Yes
JUND	3727	transcription factor jun-D isoform JunD-FL [Homo sapiens]	S255	LAALKDEPQTVPDVPSFGEsPPLSPIDMDTQER	102469037	2×TMT6plex [N-Term; K5]; 1×Deamidated [Q9; Q]; 1×Phospho [S20(97)]	102469037 1×Phospho [S255(97)]	0.015552	0.000941371	1	2	3	558695424; 102469037	102469037 [236-268]	1	4119.03	S20(Phospho): 97.04	1.88	2.46											3.5357	High	0.0003157	0.003257	7.61	High	0.001488	1	S20(Phospho): 97.04	S20;	102469037	NP_005345.3	DVPSFGEsPPLSPID	Yes
NOTCH2	4853	neurogenic locus notch homolog protein 2 isoform 1 preproprotein [Homo sapiens]	S2081	LLDEYNVTPSPPGTVLTSALsPVICGPNR	24041035	1×TMT6plex [N-Term]; 1×Carbamidomethyl [C25]; 1×Phospho [S21(100)]	24041035 1×Phospho [S2081(100)]	4.33e-05	6.55e-05	1	1	14	24041035	24041035 [2061-2089]	0	3376.71	S21(Phospho): 100	1.96	2.82	0.86	1.18	0.73	1.37	1.27	1.54	1.22	1.29	0.83	1.35	6.48875	High	1.3e-05	1.86e-05	55.21	High	1.91e-05	1	S21(Phospho): 100	S21;	24041035	NP_077719.2	TVLTSALsPVICGPN	Yes
PHF6	84295	PHD finger protein 6 isoform 1 [Homo sapiens]	S155	TAHNSEADLEESFNEHELEPSsPK	62865858	2×TMT6plex [N-Term; K24]; 2×Deamidated [N4; N14]; 1×Phospho [S22(100)]	62865858 1×Phospho [S155(100)]	0.000118459	9e-05	1	1	3	62865858	62865858 [134-157]	0	3237.45	S22(Phospho): 99.97	1.46	2.38	1.55	1.19	1.27	1.21							5.06308	High	2.03e-05	4.27e-05	17.24	High	5.72e-05	1	S22(Phospho): 99.97	S22;	62865858	NP_001015877.1	EHELEPSsPKSKKKS	Yes
TP53BP1	7158	tumor suppressor p53-binding protein 1 isoform 1 [Homo sapiens]	S585	FVPAENDSILMNPAQDGEVQLsQNDDKTK	213972636	3×TMT6plex [N-Term; K27; K29]; 1×Deamidated [Q/N]; 1×Phospho [S22(100)]	213972636 1×Phospho [S585(100)]	7.42e-05	9e-05	1	3	6	5032189; 213972634; 213972636	213972636 [564-592]	1	3971.96	S22(Phospho): 99.97	1.38	2.33	1.09	1.54	1.08	1.46							6.81955	High	2.03e-05	3.43e-05	46.89	High	2.27e-05	1	S22(Phospho): 99.97	S22;	213972636	NP_001135452.1	QDGEVQLsQNDDKTK	No
DDX42	11325	ATP-dependent RNA helicase DDX42 [Homo sapiens]	S185	YMAENPTAGVVQEEEEDNLEYDsDGNPIAPTK	45446743	2×TMT6plex [N-Term; K32]; 1×Phospho [S23(97.9)]	45446743 1×Phospho [S185(97.9)]	4.97e-05	6.55e-05	1	1	12	45446743	45446743 [163-194]	0	4063.84	S23(Phospho): 97.9	1.06	0.71	1.12	1.49	1.59	0.99	1.42	0.91	1.08	1.45	1.53	1.49	5.79273	High	1.3e-05	2.24e-05	44.38	High	6.51e-05	1	S23(Phospho): 97.9	S23;	45446743	NP_031398.2	EDNLEYDsDGNPIAP	Yes
EHMT2	10919	histone-lysine N-methyltransferase EHMT2 isoform a [Homo sapiens]	S173	LLSMPGAQGAAAAGSEPPPATTsPEGQPK	156142197	2×TMT6plex [N-Term; K29]; 1×Phospho [T/S]		0.000103142	9e-05	1	3	10	156142199; 574957264; 156142197	156142197 [151-179]	0	3256.63	S23(Phospho): 98.5	1.88	2.47	1.63	1.48	1.47	1.91	0.71	0.51	1.39	1.24	1.23	1.04	5.13391	High	2.03e-05	5.59e-05	27.56	High	7.92e-05	1	S23(Phospho): 98.5	S23;	156142197	NP_006700.3	EPPPATTsPEGQPKV	Yes
SLC9A3R1	9368	Na(+)/H(+) exchange regulatory cofactor NHE-RF1 [Homo sapiens]	S269	VIPSQEHLNGPLPVPFTNGEIQKENsR	4759140	2×TMT6plex [N-Term; K23]; 2×Deamidated [N9; N18]; 1×Phospho [S26(100)]	4759140 1×Phospho [S269(100)]	7.78e-05	9e-05	1	1	8	4759140	4759140 [244-270]	1	3540.81	S26(Phospho): 100	1.18	1.23	1.61	1.32	2.57	1.8	1.16	1.27	2.01	1.22	2.51	1.86	6.36163	High	2.03e-05	3.22e-05	25.8	High	8.36e-05	1	S26(Phospho): 100	S26;	4759140	NP_004243.1	GEIQKENsREALAEA	Yes
PTGES3	10728	prostaglandin E synthase 3 isoform e [Homo sapiens]	S152; S155	FSEMMNNMGGDEDVDLPEVDGADDDsQDsDDEKMPDLE	543583697	2×TMT6plex [N-Term; K33]; 1×Deamidated [N/Q]; 2×Phospho [S26(100); S29(100)]	543583697 2×Phospho [S152(100); S155(100)]	0.00165401	0.000236062	1	3	31	543583697; 543583707; 23308579	543583697 [127-164]	1	4825.85	S26(Phospho): 100; S29(Phospho): 100	1.14	1.3	1.64	1.82	1.93	1.84	0.98	1.03	0.92	1.3	1.07	0.78	3.52308	High	7.41e-05	0.0003464	23.97	High	0.0002291	1	S26(Phospho): 100; S29(Phospho): 100	S26; S29;	543583697	NP_001269533.1	VDGADDDsQDSDDEK;ADDDSQDsDDEKMPD	No;No
PTGES3	10728	prostaglandin E synthase 3 isoform e [Homo sapiens]	S152; S155	FSEMMNNMGGDEDVDLPEVDGADDDsQDsDDEKMPDLE	543583697	2×TMT6plex [N-Term; K33]; 2×Deamidated [N/Q]; 2×Phospho [S26(100); S29(100)]	543583697 2×Phospho [S152(100); S155(100)]	0.0013824	0.000236062	1	3	7	543583697; 543583707; 23308579	543583697 [127-164]	1	4826.83	S26(Phospho): 100; S29(Phospho): 100	0.93	0.71	1.41	2.12	1.97	1.42	0.91	0.44				0.75	3.16287	High	0.0001151	0.0005236	26.29	High	9.32e-05	1	S26(Phospho): 100; S29(Phospho): 100	S26; S29;	543583697	NP_001269533.1	VDGADDDsQDSDDEK;ADDDSQDsDDEKMPD	No;No
TBC1D17	79735	TBC1 domain family member 17 isoform 1 [Homo sapiens]	S602; S604	QLTACPELPHNVQEILGLAPPAEPHsPsPTASPLPLSPTR	270265906	1×TMT6plex [N-Term]; 2×Deamidated [Q/N]; 1×Carbamidomethyl [C5]; 2×Phospho [S26(99.3); S28(91.7)]	270265906 2×Phospho [S602(99.3); S604(91.7)]	0.000288849	0.000147488	1	2	6	270265908; 270265906	270265906 [577-616]	0	4611.24	S26(Phospho): 99.26; S28(Phospho): 91.7	1.28	2.26	1.38		1.84	0.76							5.32707	High	7.41e-05	0.0003486	13.72	High	6.51e-05	1	S26(Phospho): 99.26; S28(Phospho): 91.7	S26; S28;	270265906	NP_078958.2	APPAEPHsPSPTASP;PAEPHSPsPTASPLP	Yes;Yes
RABGAP1L	9910	rab GTPase-activating protein 1-like isoform A [Homo sapiens]	S490	ESDKEEPVTPTSGGGPMSPQDDEAEEEsDNELSSGTGDVSK	78217386	3×TMT6plex [N-Term; K4; K41]; 2×Deamidated [Q20; N30]; 1×Phospho [S28(93.8)]	78217386 1×Phospho [S490(93.8)]	0.00136112	0.000236062	1	1	2	78217386	78217386 [463-503]	1	4993.19	S28(Phospho): 93.77	2.04	1.7	1.97	1.71	1.83	1.39							3.4994	High	7.18e-05	0.0002982	25.62	High	0.0001709	1	S28(Phospho): 93.77	S28;	78217386	NP_055672.3	DDEAEEEsDNELSSG	Yes
EIF4EBP1	1978	eukaryotic translation initiation factor 4E-binding protein 1 [Homo sapiens]	S101	DLPTIPGVTSPSSDEPPMEASQSHLRNsPEDK	4758258	2×TMT6plex [N-Term; K32]; 1×Deamidated [N/Q]; 1×Phospho [S28(95.1)]	4758258 1×Phospho [S101(95.1)]	0.000177381	0.00012481	1	1	6	4758258	4758258 [74-105]	1	3957.88	S28(Phospho): 95.1	1.62	1.41	1.44	1.91	1.22	2.05	0.95	0.9	0.87	0.86	0.71	0.99	6.48224	High	2.03e-05	5.87e-05	10.53	High	0.0001716	1	S28(Phospho): 95.1	S28;	4758258	NP_004086.1	SQSHLRNsPEDKRAG	Yes
SNTB2	6645	beta-2-syntrophin [Homo sapiens]	S233	KPSLVSDLPWEGAAPQSPSFSGSEDSGsPK	5803177	3×TMT6plex [N-Term; K30; K]; 1×Phospho [S28(98.3)]	5803177 1×Phospho [S233(98.3)]	4.27e-05	6.55e-05	1	1	13	5803177	5803177 [206-235]	0	3811.9	S28(Phospho): 98.29	1.28	1.8	1.6	1.96	1.16	2.88	3.92	5.87	2.35	4.73	1.93	7.2	6.29243	High	1.3e-05	1.88e-05	49.02	High	1.91e-05	1	S28(Phospho): 98.29	S28;	5803177	NP_006741.1	SGSEDSGsPKHQNST	Yes
FEM1C	56929	protein fem-1 homolog C [Homo sapiens]	S391	YALDMQQSNLDPLSPMTASSLLSFAELFsFMLQDR	17864094	1×TMT6plex [N-Term]; 2×Deamidated [Q6; Q/N]; 1×Phospho [S29(85.9)]	17864094 1×Phospho [S391(85.9)]	0.0202838	0.0012448	1	1	20	17864094	17864094 [363-397]	0	4277.99	S29(Phospho): 85.91	1.23	1.51	1.62	1.53	1.31	1.38	0.67	0.76	1.11	0.9	0.95	0.92	6.05514	High	0.0003194	0.003347					S29(Phospho): 85.91	S29;	17864094	NP_064562.1	LSFAELFsFMLQDRA	No
SRRM2	23524	serine/arginine repetitive matrix protein 2 [Homo sapiens]	S472	DKsHSHTPSR	118572613	2×TMT6plex [N-Term; K2]; 1×Phospho [S3(100)]	118572613 1×Phospho [S472(100)]	0.0716545	0.00330824	1	1	4	118572613	118572613 [470-479]	1	1689.85	S3(Phospho): 100	3.72	1.34	0.92	0.61	0.65	0.95							3.41191	High	0.000867	0.01454	7.83	High	0.009747	1	S3(Phospho): 100	S3;	118572613	NP_057417.3	GRAKRDKsHSHTPSR	Yes
ERCC6L	54821	DNA excision repair protein ERCC-6-like [Homo sapiens]	S1028	IVsDGEDEDDSFKDTSSINPFNTSLFQFSSVK	58331268	3×TMT6plex [N-Term; K13; K32]; 2×Deamidated [N19; N22]; 1×Phospho [S3(100)]	58331268 1×Phospho [S1028(100)]	0.000468312	0.000193352	1	1	3	58331268	58331268 [1026-1057]	1	4325.05	S3(Phospho): 100	2.43	1.04	1.8	0.58	1.26	1.16							5.02119	High	4.98e-05	0.000133	27.38	High	0.000139	1	S3(Phospho): 100	S3;	58331268	NP_060139.2	SKARRIVsDGEDEDD	Yes
TIAM1	7074	T-lymphoma invasion and metastasis-inducing protein 1 [Homo sapiens]	S231	ANsLGDLYAQK	115583670	2×TMT6plex [N-Term; K11]; 1×Phospho [S3(100)]	115583670 1×Phospho [S231(100)]	0.00356038	0.000383028	1	1	4	115583670	115583670 [229-239]	0	1717.89	S3(Phospho): 100	2.32	0.69	0.58	1.13	1.43	0.83	1.85	0.71	0.57	0.93	1.35	0.93	3.54848	High	0.0001218	0.0006446	15.23	High	0.0006409	1	S3(Phospho): 100	S3;	115583670	NP_003244.2	STCQRANsLGDLYAQ	Yes
BAZ1A	11177	bromodomain adjacent to zinc finger domain protein 1A isoform a [Homo sapiens]	S1413	RQsPEPSPVTLGR	32967603	1×TMT6plex [N-Term]; 1×Phospho [S3(100)]	32967603 1×Phospho [S1413(100)]	0.000509046	0.000193352	1	2	6	32967603; 32967605	32967603 [1411-1423]	1	1732.89	S3(Phospho): 100	2.31	1.81	1.57	1.02	1.79	1.51	2.04	0.99	1.01	0.98	1.57	1.41	4.36011	High	5.25e-05	0.0001418	22.08	High	0.0001165	1	S3(Phospho): 100	S3;	32967603	NP_038476.2	RRCRKRQsPEPSPVT	Yes
NEURL4	84461	neuralized-like protein 4 isoform 1 [Homo sapiens]	S502	ALsPEGALR	53829370	1×TMT6plex [N-Term]; 1×Phospho [S3(100)]	53829370 1×Phospho [S502(100)]	0.0120765	0.000778694	1	2	4	53829370; 53829368	53829370 [500-508]	0	1222.64	S3(Phospho): 100	2.25	1.97	1.45	1.47	1.22	1.7	1.92	1.58	1.41	1.24	1.01	1.41	2.93641	High	0.0002059	0.002002	16.8	High	0.0006089	1	S3(Phospho): 100	S3;	53829370	NP_115818.2	NAILRALsPEGALRR	Yes
ADD1	118	alpha-adducin isoform b [Homo sapiens]	S631	EKsPPDQPAVPHPPPSTPIK	29826321	3×TMT6plex [N-Term; K2; K20]; 1×Phospho [S3(100)]	29826321 1×Phospho [S631(100)]	7.62e-05	9e-05	1	5	6	29826323; 29826325; 557786217; 29826321; 29826319	29826321 [629-648]	1	2886.57	S3(Phospho): 100	2.2	1.45	1.55	1.26	1.43	1.15	2.05	1.04	1.7	1.25	1.35	1.21	6.36672	High	2.03e-05	3.17e-05	22.69	High	8.27e-05	1	S3(Phospho): 100	S3;	29826321	NP_054908.2	AREQKEKsPPDQPAV	No
KIAA1217	56243	sickle tail protein homolog isoform 1 [Homo sapiens]	S1461	RLsTIFEECDEELER	50843820	1×TMT6plex [N-Term]; 1×Carbamidomethyl [C9]; 1×Phospho [S3(100)]	50843820 1×Phospho [S1461(100)]	0.000208472	0.00012481	1	1	8	50843820	50843820 [1459-1473]	1	2235.02	S3(Phospho): 100	1.91	2.06	1.11	1.41	1.22	0.82	0.7	1.17	0.62	0.95	0.99	0.68	5.60575	High	2.03e-05	6.75e-05	37.35	High	0.0001196	1	S3(Phospho): 100	S3;	50843820	NP_062536.2	RSAYKRLsTIFEECD	No
AFAP1L2	84632	actin filament-associated protein 1-like 2 isoform 3 [Homo sapiens]	S537	KFsEPNTYIDGLPSQDR	568214566	2×TMT6plex [N-Term; K]; 1×Phospho [S3(100)]	568214566 1×Phospho [S537(100)]	7.87e-05	9e-05	1	3	4	568214566; 50897850; 24308338	568214566 [535-551]	1	2505.24	S3(Phospho): 100	1.9	0.71	4.29	0.6	1.35	0.65	1.52	0.76	4.64	0.46	0.8	0.4	5.97203	High	2.03e-05	3.24e-05	39.93	High	2.27e-05	1	S3(Phospho): 100	S3;	568214566	NP_001274753.1	LLMQRKFsEPNTYID	No
MYCBP2	23077	E3 ubiquitin-protein ligase MYCBP2 [Homo sapiens]	S2812	AEsPGPGSR	291190787	1×TMT6plex [N-Term]; 1×Phospho [S3(100)]	291190787 1×Phospho [S2812(100)]	0.0309656	0.00166394	1	1	7	291190787	291190787 [2810-2818]	0	1166.54	S3(Phospho): 100	1.89	2.19	1.42	1.21	1.44	1.27	1.35	1.32	1.25	1.04	1.26	1.17	2.93993	High	0.0003967	0.005184	23.86	High	0.0004065	1	S3(Phospho): 100	S3;	291190787	NP_055872.4	PSSSRAEsPGPGSRL	No
STIP1	10963	stress-induced-phosphoprotein 1 isoform a [Homo sapiens]	S528	HDsPEDVK	544063423	2×TMT6plex [N-Term; K8]; 1×Phospho [S3(100)]	544063423 1×Phospho [S528(100)]	0.00976669	0.000765738	1	3	20	544063423; 5803181; 544063449	544063423 [526-533]	0	1464.71	S3(Phospho): 100	1.84	1.68	1.99	1.58	1.9	1.82	1.7	1.22	1.87	1.47	1.73	1.6	4.40991	High	0.0001912	0.001623	30.72	High	0.0002874	1	S3(Phospho): 100	S3;	544063423	NP_001269581.1	AQYNRHDsPEDVKRR	No
SKIV2L	6499	helicase SKI2W [Homo sapiens]	S256	ASsLEDLVLK	67782311	2×TMT6plex [N-Term; K10]; 1×Phospho [S3(100)]	67782311 1×Phospho [S256(100)]	0.00408279	0.000383028	1	1	35	67782311	67782311 [254-263]	0	1612.9	S3(Phospho): 100	1.82	1.75	1.62	1.44	1.34	1.12	1.8	1.69	1.29	1.4	1.28	1.15	4.28059	High	0.0001457	0.001128	56.65	High	0.0001716	1	S3(Phospho): 100	S3;	67782311	NP_008860.4	APLARASsLEDLVLK	Yes
FHOD3	80206	FH1/FH2 domain-containing protein 3 isoform 3 [Homo sapiens]	S345	RAsVCSSGGGEHR	528524524	1×TMT6plex [N-Term]; 1×Carbamidomethyl [C5]; 1×Phospho [S3(100)]	528524524 1×Phospho [S345(100)]	0.000237002	0.000147488	1	3	6	528524524; 528524522; 58331242	528524524 [343-355]	1	1668.75	S3(Phospho): 100	1.78	1.94	1.68	1.03	2.97	1.59	1.93	1.89	2.15	0.91	3.22	1.5	5.64149	High	2.03e-05	8.03e-05	33.83	High	0.0001068	1	S3(Phospho): 100	S3;	528524524	NP_001268669.1	CRDRRRAsVCSSGGG	Yes
STMN1	3925	stathmin isoform a [Homo sapiens]	S46	DLsLEEIQK	5031851	2×TMT6plex [N-Term; K9]; 1×Phospho [S3(100)]	5031851 1×Phospho [S46(100)]	0.0196888	0.0012448	1	4	6	224451142; 5031851; 312922390; 34850061	5031851 [44-52]	0	1612.86	S3(Phospho): 100	1.69	1.34	2.07	0.89	1.11	1.93	1.67	1.56	2.15	0.97	1.35	1.85	3.82249	High	0.0003387	0.004125	29.73	High	0.002749	1	S3(Phospho): 100	S3;	5031851	NP_005554.1	PPKKKDLsLEEIQKK	Yes
BET1	10282	BET1 homolog [Homo sapiens]	S50	SLsIEIGHEVK	5031611	2×TMT6plex [N-Term; K11]; 1×Phospho [S3(100)]	5031611 1×Phospho [S50(100)]	0.0039567	0.000383028	1	1	3	5031611	5031611 [48-58]	0	1749.96	S3(Phospho): 100	1.61	0.58	2.13	1.5	1.09	1.04							4.0606	High	0.0001218	0.0007042	30.51	High	0.0001777	1	S3(Phospho): 100	S3;	5031611	NP_005859.1	VTAIKSLsIEIGHEV	Yes
BAZ1B	9031	tyrosine-protein kinase BAZ1B [Homo sapiens]	S1342	RQsLELQK	14670392	2×TMT6plex [N-Term; K8]; 1×Deamidated [Q]; 1×Phospho [S3(100)]	14670392 1×Phospho [S1342(100)]	0.0508289	0.00244582	1	1	8	14670392	14670392 [1340-1347]	1	1540.85	S3(Phospho): 100	1.55	1.1	2.62	1.13	1.63	1.67	1.67	1.05	2.84	1.2	1.94	1.71	3.67137	High	0.001054	0.01836	28.91	High	0.003266	1	S3(Phospho): 100	S3;	14670392	NP_115784.1	KRSSRRQsLELQKCE	Yes
AHCTF1	25909	protein ELYS [Homo sapiens]	S1550	NLsFNELYPSGTLK	262359929	2×TMT6plex [N-Term; K14]; 1×Phospho [S3(100)]	262359929 1×Phospho [S1550(100)]	0.000440081	0.000193352	1	1	6	262359929	262359929 [1548-1561]	0	2121.1	S3(Phospho): 100	1.54	1.39	1.98	1.18	1.87	1.34	1.67	1.86	1.9	1.2	1.77	1.6	4.76445	High	4.98e-05	0.0001271	36.68	High	9.32e-05	1	S3(Phospho): 100	S3;	262359929	NP_056261.4	GEEARNLsFNELYPS	No
SSFA2	6744	sperm-specific antigen 2 isoform 1 [Homo sapiens]	S270	IGsMSSVTSNK	194363771	2×TMT6plex [N-Term; K11]; 1×Phospho [S3(100)]	194363771 1×Phospho [S270(100)]	0.00622048	0.000503144	1	4	9	566559802; 194363771; 28557788; 566559898	194363771 [268-278]	0	1648.84	S3(Phospho): 100	1.38	1.29	1.86	2.09	1.73	1.4	1.71	1.44	2.03	2.78	2.05	1.76	3.01837	High	0.0001331	0.001056	22.9	High	0.0001961	1	S3(Phospho): 100	S3;	194363771	NP_001123917.1	TPLQRIGsMSSVTSN	Yes
AHNAK2	113146	protein AHNAK2 [Homo sapiens]	S842	MPsFGVSAPGK	156766050	2×TMT6plex [N-Term; K11]; 1×Oxidation [M1]; 1×Phospho [S3(100)]	156766050 1×Phospho [S842(100)]; 1×Phospho [S1846(100)]; 1×Phospho [S3180(100)]; 1×Phospho [S4679(100)]; 1×Phospho [S6343(100)]; 1×Phospho [S8172(100)]; 1×Phospho [S10331(100)]; 1×Phospho [S12820(100)]; 1×Phospho [S15639(100)]; 1×Phospho [S18623(100)]; 1×Phospho [S21772(100)]; 1×Phospho [S25581(100)]; 1×Phospho [S29555(100)]; 1×Phospho [S33694(100)]; 1×Phospho [S37998(100)]	0.0434915	0.00214407	1	1	6	156766050	156766050 [840-850]; [1005-1015]; [1335-1345]; [1500-1510]; [1665-1675]; [1830-1840]; [2160-2170]; [2490-2500]; [2820-2830]; [2985-2995]; [3150-3160]; [3810-3820]; [3975-3985]; [4140-4150]; [4305-4315]	0	1631.83	S3(Phospho): 100	1.35	1.36	2.01	1.16	0.98	0.94	1.25	1.02	2.7	1.29	0.85	0.69	3.6695	High	0.0005489	0.007432	14.42	High	0.006385	1	S3(Phospho): 100	S3;	156766050	NP_612429.2	MPKFKMPsFGVSAPG	Yes
KLC4	89953	kinesin light chain 4 isoform b [Homo sapiens]	S537	RTsQEGPGDSVK	41871960	2×TMT6plex [N-Term; K12]; 1×Phospho [S3(100)]	41871960 1×Phospho [S537(100)]	9.01e-05	9e-05	1	3	6	41871946; 573459761; 41871960	41871960 [535-546]	1	1798.91	S3(Phospho): 100	1.29	1.43	1.6	1.6	2.64	1.43							6.32509	High	2.03e-05	3.54e-05	54.73	High	5.72e-05	1	S3(Phospho): 100	S3;	41871960	NP_958931.1	ESDGRRTsQEGPGDS	No
PHKA2	5256	phosphorylase b kinase regulatory subunit alpha, liver isoform [Homo sapiens]	S1015	RFsADEQFFSVGQAASSSAHSSK	4505781	2×TMT6plex [N-Term; K23]; 1×Phospho [S3(100)]	4505781 1×Phospho [S1015(100)]	4.57e-05	6.55e-05	1	1	6	4505781	4505781 [1013-1035]	1	2969.42	S3(Phospho): 100	1.28	2.73	1.21	1.28	1.27	0.99	1.03	1.26	0.86	1.22	0.93	0.75	7.10579	High	1.3e-05	2.06e-05	43.62	High	6.51e-05	1	S3(Phospho): 100	S3;	4505781	NP_000283.1	KQMTRRFsADEQFFS	Yes
DENND4C	55667	DENN domain-containing protein 4C [Homo sapiens]	S1325	STsLSALVR	408684407	1×TMT6plex [N-Term]; 1×Phospho [S3(100)]	408684407 1×Phospho [S1325(100)]	0.0647509	0.00307547	1	1	5	408684407	408684407 [1323-1331]	0	1242.67	S3(Phospho): 100	1.28	1.68	1.72	1.22	2.13	1.29	1.14	1.79	1.93	1.3	2.32	1.48	3.53339	High	0.0009229	0.01571	19.45	High	0.00495	1	S3(Phospho): 100	S3;	408684407	NP_060395.5	THKERSTsLSALVRS	No
FOXO3	2309	forkhead box protein O3 [Homo sapiens]	S253	AVsMDNSNK	4503739	2×TMT6plex [N-Term; K9]; 1×Deamidated [N6]; 1×Phospho [S3(100)]	4503739 1×Phospho [S253(100)]	0.0991186	0.00458159	1	1	4	4503739	4503739 [251-259]	0	1504.71	S3(Phospho): 100	1.22	2.39	1.1	1.05	0.99	0.97	1.72	2.6	1.22	0.76	0.93	0.89	2.36232	High	0.001054	0.01844	14.23	High	0.002112	1	S3(Phospho): 100	S3;	4503739	NP_001446.1	APRRRAVsMDNSNKY	Yes
REPS1	85021	ralBP1-associated Eps domain-containing protein 1 isoform c [Homo sapiens]	S272	RQsSSYDDPWK	557636683	2×TMT6plex [N-Term; K11]; 1×Deamidated [Q2]; 1×Phospho [S3(100)]	557636683 1×Phospho [S272(100)]	0.00410856	0.000383028	1	4	7	557636683; 190886437; 557636649; 190886435	557636683 [270-280]	1	1907.89	S3(Phospho): 100	1.2	1.56	1.11	1.09	2.12	1.39	0.95	1.07	1.2	1.15	2.11	1.49	4.31119	High	0.0001218	0.0007265	16.04	High	0.0003595	1	S3(Phospho): 100	S3;	557636683	NP_001273540.1	AIEIRRQsSSYDDPW	Yes
TLN1	7094	talin-1 [Homo sapiens]	S1641	TVsDSIK	223029410	2×TMT6plex [N-Term; K7]; 1×Phospho [S3(100)]	223029410 1×Phospho [S1641(100)]	0.118036	0.00578875	1	1	2	223029410	223029410 [1639-1645]	0	1287.7	S3(Phospho): 100	1.16	3.21	1.24	1.04	0.9	1.43							2.37501	High	0.001323	0.02335	17.64	High	0.001317	1	S3(Phospho): 100	S3;	223029410	NP_006280.3	AGHSRTVsDSIKKLI	Yes
MTFR1	9650	mitochondrial fission regulator 1 isoform 3 [Homo sapiens]	S290	SDsQDEVEK	224994164	2×TMT6plex [N-Term; K9]; 1×Phospho [S3(100)]	224994164 1×Phospho [S290(100)]	0.00371775	0.000383028	1	3	6	224994164; 224994162; 224994160	224994164 [288-296]	0	1574.74	S3(Phospho): 100	1.09	0.99	1.26	1.47	2.94	1.2	1.39	1.11	1.57	1.73	4.27	1.25	3.73917	High	0.0001218	0.0006685	19.04	High	0.0007477	1	S3(Phospho): 100	S3;	224994164	NP_001139311.1	AYRYRSDsQDEVEKG	Yes
PRKAG2	51422	5'-AMP-activated protein kinase subunit gamma-2 isoform d [Homo sapiens]	S25	RQsEPHGLFASGLSSSPSTPTQVTK	751557642	2×TMT6plex [N-Term; K25]; 1×Phospho [S3(100)]	751557642 1×Phospho [S25(100)]	0.000112298	9e-05	1	1	6	751557642	751557642 [23-47]	1	3137.6	S3(Phospho): 100	0.98	0.74	2.13	0.9	0.73	0.82	1.08	0.87	2.12	0.56	0.64	0.87	6.49631	High	2.03e-05	4.11e-05	20.04	High	0.0001475	1	S3(Phospho): 100	S3;	751557642	NP_001291456.1	RSTERRQsEPHGLFA	Yes
RNF25	64320	E3 ubiquitin-protein ligase RNF25 [Homo sapiens]	S450	REsLGLESK	34878787	2×TMT6plex [N-Term; K9]; 1×Phospho [S3(100)]	34878787 1×Phospho [S450(100)]	0.0265891	0.00146192	1	1	4	34878787	34878787 [448-456]	1	1556.84	S3(Phospho): 100	0.95	1.37	1.95	0.92	2.15	1.32	0.16	0.23	0.32	0.19	0.41	0.19	3.5936	High	0.0005847	0.008119	23.53	High	0.002175	1	S3(Phospho): 100	S3;	34878787	NP_071898.2	RPGTRREsLGLESKD	Yes
CDC42BPA	8476	serine/threonine-protein kinase MRCK alpha isoform B [Homo sapiens]	S1638	EFsGGSYSAK	30089962	2×TMT6plex [N-Term; K10]; 1×Phospho [S6(99.3)]	30089962 1×Phospho [S1641(99.3)]	0.0372426	0.00188094	1	2	7	30089962; 30089960	30089962 [1636-1645]	0	1570.76	S3(Phospho): 100	0.89	1.19	2.02	0.9	0.88	0.78	1.27	1.39	2.06	1.47	0.93	1.16	3.05702	High	0.0004774	0.006306	16.06	High	0.001268	1	S3(Phospho): 100	S3;	30089962	NP_003598.2	SALKREFsGGSYSAK	No
RBM7	10179	RNA-binding protein 7 isoform a [Homo sapiens]	S137	SFsSPENFQR	554506545	1×TMT6plex [N-Term]; 1×Phospho [S3(100)]	554506545 1×Phospho [S137(100)]	0.0233848	0.00137655	1	3	5	554506545; 554790269; 9994185	554506545 [135-144]	0	1507.68	S3(Phospho): 100	0.87	1.53	1	0.86	0.56	0.96							2.93054	High	0.0004706	0.006051	19.61	High	0.001097	1	S3(Phospho): 100	S3;	554506545	NP_001272974.1	QIIQRSFsSPENFQR	No
BCAR3	8412	breast cancer anti-estrogen resistance protein 3 isoform 1 [Homo sapiens]	S290	RLsLTMGGVQAR	387157906	1×TMT6plex [N-Term]; 1×Phospho [S3(100)]	387157906 1×Phospho [S290(100)]	0.000700871	0.000193352	1	2	12	387157906; 387157911	387157906 [288-299]	1	1597.84	S3(Phospho): 100	0.81	1.3	1.29	0.76	2.02	1.14	1.09	2.21	1.8	1.46	1.7	1.49	4.18928	High	5.93e-05	0.0002358	44.65	High	0.0001196	1	S3(Phospho): 100	S3;	387157906	NP_001248337.1	PDVAKRLsLTMGGVQ	Yes
LMO7	4008	LIM domain only protein 7 isoform 1 [Homo sapiens]	S1159	SAsVNKEPVSLPGIMR	33598968	2×TMT6plex [N-Term; K6]; 1×Phospho [S3(100)]	33598968 1×Phospho [S1159(100)]	0.0536847	0.00248252	1	3	3	33598968; 807045912; 221316634	33598968 [1157-1172]	1	2223.2	S3(Phospho): 100	0.64	2.09	0.89	1.14	0.72	1.03	0.43	1.67	1.13	1.47	1.16	1.63	4.3124	High	0.0009469	0.0161					S3(Phospho): 100	S3;	33598968	NP_005349.3	WIRQRSAsVNKEPVS	Yes
AFAP1L1	134265	actin filament-associated protein 1-like 1 isoform 1 [Homo sapiens]	S747	SPsIVASNQGR	55742689	1×TMT6plex [N-Term]; 1×Phospho [S3(100)]	55742689 1×Phospho [S747(100)]	0.00697177	0.000523051	1	1	2	55742689	55742689 [745-755]	0	1424.71	S3(Phospho): 100	0.64	2.08	1.1	0.79	0.65	0.87							3.02468	High	0.0001488	0.001178	26.43	High	0.0001811	1	S3(Phospho): 100	S3;	55742689	NP_689619.1	ELRKRSPsIVASNQG	Yes
FAM83B	222584	protein FAM83B [Homo sapiens]	S729	RNsPSGTTTK	61676089	2×TMT6plex [N-Term; K10]; 1×Phospho [S3(100)]	61676089 1×Phospho [S729(100)]	0.00867665	0.00064256	1	1	5	61676089	61676089 [727-736]	1	1586.83	S3(Phospho): 100	0.6	0.53	0.75	1.18	2.44	0.78							3.83497	High	0.0001764	0.001447	22.41	High	0.0004033	1	S3(Phospho): 100	S3;	61676089	NP_001010872.1	EEVTKRNsPSGTTTK	Yes
CEP170	9859	centrosomal protein of 170 kDa isoform alpha [Homo sapiens]	S1529	QKSSPVNNHHsPGQTPTLGQPEAR	109255228	2×TMT6plex [N-Term; K2]; 2×Phospho [S11(100); S/T]	109255228 2×Phospho [S1529(100); S/T]	0.00108524	0.000214298	1	3	3	109255228; 109255230; 109255232	109255228 [1519-1542]	1	3185.53	S3(Phospho): 50; S4(Phospho): 50; S11(Phospho): 100	1.31	1.25	1.07	0.93	0.7	2.29							4.3652	High	5.93e-05	0.0002505	14.54	High	0.0001545	1	S3(Phospho): 50; S4(Phospho): 50; S11(Phospho): 100	S11;	109255228	NP_055627.2	SPVNNHHsPGQTPTL	Yes
THOC2	57187	THO complex subunit 2 [Homo sapiens]	S1516	SEsPCESPYPNEK	125656165	2×TMT6plex [N-Term; K13]; 1×Carbamidomethyl [C5]; 1×Phospho [S3(97.2)]	125656165 1×Phospho [S1516(97.2)]	0.0334336	0.00172654	1	1	1	125656165	125656165 [1514-1526]	0	2061.92	S3(Phospho): 97.2	1.38	1.14	2.13	1.35	1.62	1.24							2.72732	High	0.0004181	0.005639					S3(Phospho): 97.2	S3;	125656165	NP_001075019.1	VSKHKSEsPCESPYP	Yes
MYPN	84665	myopalladin isoform a [Homo sapiens]	S759	TVsKESLLVSHPSVQTK	372220097	3×TMT6plex [N-Term; K4; K17]; 1×Phospho [S3(100)]	372220097 1×Phospho [S759(100)]	0.000185029	0.00012481	1	2	21	372220099; 372220097	372220097 [757-773]	1	2607.47	S3(Phospho): 98.33	1.38	1.27	1.02	1.51	1.21	1.83	1.47	1.49	1.06	1.68	1.11	2.15	5.37166	High	7.41e-05	0.000382	27.2	High	8.79e-05	1	S3(Phospho): 98.33	S3;	372220097	NP_001243196.1	QTIQRTVsKESLLVS	Yes
LBR	3930	lamin-B receptor [Homo sapiens]	S99	SAsASHQADIK	37595752	2×TMT6plex [N-Term; K11]; 1×Phospho [S3(100)]	37595752 1×Phospho [S99(100)]	0.00177457	0.000236062	1	1	63	37595752	37595752 [97-107]	0	1652.84	S3(Phospho): 98.81	1.28	1.58	1.61	1.14	2.14	1.61	1.44	1.66	1.58	1.08	2.28	1.87	4.88969	High	7.41e-05	0.0004195	46.01	High	0.0002024	1	S3(Phospho): 98.81	S3;	37595752	NP_919424.1	KSARRSAsASHQADI	Yes
PTRF	284119	polymerase I and transcript release factor [Homo sapiens]	S365	RGsSPDVHALLEITEESDAVLVDK	42734430	2×TMT6plex [N-Term; K24]; 1×Phospho [S3(98.8)]	42734430 1×Phospho [S365(98.8)]	4.27e-05	6.55e-05	1	1	34	42734430	42734430 [363-386]	1	3118.61	S3(Phospho): 98.82	1.47	1.46	2.33	1.89	0.8	1.97	1.34	1.31	1.79	1.69	0.84	1.86	8.7487	High	0	1.69e-05	51.99	High	2.27e-05	1	S3(Phospho): 98.82	S3;	42734430	NP_036364.2	AGDLRRGsSPDVHAL	Yes
BOD1L1	259282	biorientation of chromosomes in cell division protein 1-like 1 [Homo sapiens]	S635	RLsESLHVVDENK	87299628	2×TMT6plex [N-Term; K13]; 1×Phospho [S3(99)]	87299628 1×Phospho [S635(99)]	0.0910955	0.00413829	1	1	4	87299628	87299628 [633-645]	1	2064.09	S3(Phospho): 98.99	1.02	2.07	1.17	0.97	0.85	1.37							3.47542	High	0.0009677	0.01666	8.6	High	0.006239	1	S3(Phospho): 98.99	S3;	87299628	NP_683692.2	SKPARRLsESLHVVD	Yes
EVI2B	2124	protein EVI2B precursor [Homo sapiens]	S268	RTsIISLTPWKPSK	148227044	3×TMT6plex [N-Term; K11; K14]; 1×Phospho [S3(99)]	148227044 1×Phospho [S268(99)]	0.0110093	0.000778694	1	1	5	148227044	148227044 [266-279]	1	2381.39	S3(Phospho): 99	0.68	4.75	0.71	0.61	0.6	0.81							2.99924	High	0.0003231	0.003412	9.86	High	0.0003273	1	S3(Phospho): 99	S3;	148227044	NP_006486.3	EISTKRTsIISLTPW	Yes
EPPK1	83481	epiplakin [Homo sapiens]	S2718	QVsASELHTSGILGPETLR	525507390	1×TMT6plex [N-Term]; 1×Deamidated [Q1]; 1×Phospho [S3(99.1)]	525507390 1×Phospho [S2718(99.1)]; 1×Phospho [S5964(99.1)]; 1×Phospho [S9744(99.1)]; 1×Phospho [S14058(99.1)]; 1×Phospho [S18905(99.1)]	8.29e-05	9e-05	1	1	31	525507390	525507390 [2716-2734]; [3247-3265]; [3781-3799]; [4315-4333]; [4848-4866]	0	2305.16	S3(Phospho): 99.04	0.61	0.68	0.57	1.29	2.51	0.61	0.67	0.78	0.73	1.66	3.56	0.91	7.40156	High	2.03e-05	3.35e-05	52.23	High	5.72e-05	1	S3(Phospho): 99.04	S3;	525507390	NP_112598.3	RGLRRQVsASELHTS	No
ERBB2IP	55914	protein LAP2 isoform 8 [Homo sapiens]	S872	SHsITNMEIGGLK	358679318	2×TMT6plex [N-Term; K13]; 1×Phospho [S3(99.5)]	358679318 1×Phospho [S872(99.5)]	9.98e-05	9e-05	1	6	13	8923909; 358679311; 358679323; 358679318; 358679316; 55770895	358679318 [870-882]	0	1925	S3(Phospho): 99.52	0.62	2.63	1.11	1.72	1.11	1.12	0.64	2.76	1.69	2.14	1.38	1.94	5.81342	High	2.03e-05	3.79e-05	28.16	High	7.72e-05	1	S3(Phospho): 99.52	S3;	358679318	NP_001240628.1	GSVVKSHsITNMEIG	Yes
ITSN2	50618	intersectin-2 isoform 1 [Homo sapiens]	S884	TVsPGSVSPIHGQGQVVENLK	194294521	2×TMT6plex [N-Term; K21]; 2×Phospho [S3(100); S/T]	194294521 2×Phospho [S884(100); S/T]	7.17e-05	9e-05	1	3	12	194294525; 194294521; 194294523	194294521 [882-902]	0	2751.39	S3(Phospho): 99.97; S6(Phospho): 50; S8(Phospho): 50	1.16	1.22	1.13	2.18	1.03	1.11	1.08	0.88	1.11	2.31	1.05	0.9	7.4717	High	2.03e-05	4.36e-05	26.99	High	7.72e-05	1	S3(Phospho): 99.97; S6(Phospho): 50; S8(Phospho): 50	S3;	194294521	NP_006268.2	SAFTRTVsPGSVSPI	Yes
BIRC6	57448	baculoviral IAP repeat-containing protein 6 [Homo sapiens]	S490	SDsVTGHTSQK	153792694	2×TMT6plex [N-Term; K11]; 1×Phospho [S3(100)]	153792694 1×Phospho [S490(100)]	0.00457655	0.000406702	1	1	8	153792694	153792694 [488-498]	0	1684.83	S3(Phospho): 99.98	1.05	1.37	1.77	1.96	2.95	1.65	1.09	1.63	1.65	1.68	3.46	1.55	2.96256	High	0.0009229	0.0157	30.95	High	0.0001674	1	S3(Phospho): 99.98	S3;	153792694	NP_057336.3	EEHSRSDsVTGHTSQ	No
NEK4	6787	serine/threonine-protein kinase Nek4 isoform 1 [Homo sapiens]	S661	RLsSDCSVTQER	148839316	1×TMT6plex [N-Term]; 1×Carbamidomethyl [C6]; 1×Phospho [S3(100)]	148839316 1×Phospho [S661(100)]	0.00956384	0.000765738	1	2	2	302058308; 148839316	148839316 [659-670]	1	1746.8	S3(Phospho): 99.99	1.37	1.81	1.44	1.29	1.29	2.1							4.18712	High	0.0001912	0.001584	26.03	High	0.001616	1	S3(Phospho): 99.99	S3;	148839316	NP_003148.2	PLPARRLsSDCSVTQ	Yes
REPS1	85021	ralBP1-associated Eps domain-containing protein 1 isoform c [Homo sapiens]	S272	RQsSSYDDPWK	557636683	2×TMT6plex [N-Term; K11]; 1×Phospho [S3(100)]	557636683 1×Phospho [S272(100)]	0.0128812	0.000778694	1	4	12	557636683; 190886437; 557636649; 190886435	557636683 [270-280]	1	1906.91	S3(Phospho): 99.99	1.35	1.14	1.11	1.14	2.09	1.33	1.12	0.96	1.05	1.02	1.84	1.11	4.20391	High	0.0002127	0.002132	14.76	High	0.0009273	1	S3(Phospho): 99.99	S3;	557636683	NP_001273540.1	AIEIRRQsSSYDDPW	Yes
C2CD5	9847	C2 domain-containing protein 5 isoform a [Homo sapiens]	S659	SQsESSDEVTELDLSHGK	555290077	2×TMT6plex [N-Term; K18]; 1×Phospho [S3(100)]	555290077 1×Phospho [S659(100)]	4.35e-05	6.55e-05	1	5	10	29789060; 555290099; 555290021; 555290077; 555290101	555290077 [657-674]	0	2486.17	S3(Phospho): 99.99	1.33	1	1.88	1.47	1.93	1.8	2.1	1.51	2.22	1.3	1.14	1.74	6.89466	High	1.3e-05	1.82e-05	50.35	High	2.27e-05	1	S3(Phospho): 99.99	S3;	555290077	NP_001273103.1	SRLLRSQsESSDEVT	Yes
DENND4C	55667	DENN domain-containing protein 4C [Homo sapiens]	S1046	SCsFSSESR	408684407	1×TMT6plex [N-Term]; 1×Carbamidomethyl [C2]; 1×Phospho [S3(100)]	408684407 1×Phospho [S1046(100)]	0.0617886	0.00283321	1	1	4	408684407	408684407 [1044-1052]	0	1355.55	S3(Phospho): 99.99	1.31	1.52	1.71	1.49	1.71	3.94	1.6	1.62	1.46	1.28	1.62	1.05	2.58037	High	0.0007112	0.01082	12.27	High	0.006496	1	S3(Phospho): 99.99	S3;	408684407	NP_060395.5	HFPERSCsFSSESRA	No
SH3BP4	23677	SH3 domain-binding protein 4 [Homo sapiens]	S42	VPsPSALLVDNPTPFGNAK	7657562	2×TMT6plex [N-Term; K19]; 1×Phospho [S3(100)]	7657562 1×Phospho [S42(100)]	8.07e-05	9e-05	1	1	9	7657562	7657562 [40-58]	0	2462.31	S3(Phospho): 99.99	1.17	3.45	1.49	1.15	1.16	1.23	0.76	1.95	1.12	0.95	0.84	0.84	5.25341	High	2.03e-05	3.3e-05	49.29	High	5.72e-05	1	S3(Phospho): 99.99	S3;	7657562	NP_055336.1	FNDIKVPsPSALLVD	Yes
DCBLD2	131566	discoidin, CUB and LCCL domain-containing protein 2 precursor [Homo sapiens]	S724	TDsCSSAQAQYDTPK	54792129	2×TMT6plex [N-Term; K15]; 1×Carbamidomethyl [C4]; 1×Phospho [S3(100)]	54792129 1×Phospho [S724(100)]	0.000195406	0.00012481	1	1	19	54792129	54792129 [722-736]	0	2196.99	S3(Phospho): 99.99	0.79	0.86	2.16	0.81	0.63	1.45	1.04	0.91	4.49	0.71	0.78	1.88	5.44533	High	2.03e-05	6.38e-05	48.05	High	8.27e-05	1	S3(Phospho): 99.99	S3;	54792129	NP_563615.3	TLLSRTDsCSSAQAQ	Yes
ZNF185	7739	zinc finger protein 185 isoform 3 [Homo sapiens]	S454	QSsPSGSEQLVR	296010963	1×TMT6plex [N-Term]; 1×Phospho [S3(100)]	296010963 1×Phospho [S454(100)]	0.0134501	0.000826283	1	8	12	296010977; 148298722; 296010968; 296010966; 296010959; 296010981; 296010963; 296010961	296010963 [452-463]	0	1583.76	S3(Phospho): 99.99	0.76	0.69	1.29	2.13	1.5	1.25	0.86	1.1	1.43	2.26	1.52	1.29	2.96528	High	0.0005812	0.007976	34.8	High	0.0002223	1	S3(Phospho): 99.99	S3;	296010963	NP_001171579.1	STPERQSsPSGSEQL	No
ERBB2IP	55914	protein LAP2 isoform 8 [Homo sapiens]	S1015	SEsTENQSYAK	358679318	2×TMT6plex [N-Term; K11]; 1×Deamidated [N/Q]; 1×Phospho [S3(100)]	358679318 1×Phospho [S1015(100)]	0.0228633	0.00137655	1	6	8	8923909; 358679311; 358679323; 358679318; 358679316; 55770895	358679318 [1013-1023]	0	1782.82	S3(Phospho): 99.99	0.59	1.74	1.96	2.39	1.19	1.46	0.65	1.84	1.66	2.9	1.36	1.47	2.67701	High	0.001843	0.03405	36.76	High	0.0003777	1	S3(Phospho): 99.99	S3;	358679318	NP_001240628.1	QLLPRSEsTENQSYA	Yes
SMARCA5	8467	SWI/SNF-related matrix-associated actin-dependent regulator of chromatin subfamily A member 5 [Homo sapiens]	S66	GGPEGVAAQAVASAASAGPADAEMEEIFDDAsPGK	325651836	2×TMT6plex [N-Term; K35]; 1×Phospho [S32(100)]	325651836 1×Phospho [S66(100)]	4.27e-05	0	1	1	77	325651836	325651836 [35-69]	0	3811.78	S32(Phospho): 100	1.62	1.13	1.23	1.14	1.76	1.57	1.67	1.15	1.34	1.4	1.69	1.5	10.0451	High	0	3.15e-06	84.32	High	1.91e-05	1	S32(Phospho): 100	S32;	325651836	NP_003592.3	EEIFDDAsPGKQKEI	Yes
COASY	80347	bifunctional coenzyme A synthase isoform c [Homo sapiens]	S207	LASVLLYSDYGIGEVPVEPLDVPLPSTIRPAsPVAGSPK	205277394	2×TMT6plex [N-Term; K39]; 1×Phospho [S32(99.9)]	205277394 1×Phospho [S207(99.9)]	4.27e-05	6.55e-05	1	2	34	110227603; 205277394	205277394 [176-214]	0	4542.46	S32(Phospho): 95.68	0.69	0.76	0.84	1.19	0.81	0.66	0.64	0.66	0.72	1.37	0.97	0.62	8.82798	High	0	8.18e-06	49.74	High	1.91e-05	1	S32(Phospho): 95.68	S32;	205277394	NP_001035997.2	PSTIRPAsPVAGSPK	No
STK11IP	114790	serine/threonine-protein kinase 11-interacting protein [Homo sapiens]	S470	SHLEPSGNPLPATPTTSAPSAPPASSQGPDTAPRPsPPQEEAR	806638628	1×TMT6plex [N-Term]; 1×Phospho [S36(100)]	806638628 1×Phospho [S470(100)]	4.35e-05	6.55e-05	1	1	13	806638628	806638628 [435-477]	0	4594.2	S36(Phospho): 100	1.67	1.97	1.49	1.76	1.34	2.21							6.23549	High	1.3e-05	1.81e-05	32.59	High	1.91e-05	1	S36(Phospho): 100	S36;	806638628	NP_443134.3	PDTAPRPsPPQEEAR	No
RSF1	51773	remodeling and spacing factor 1 [Homo sapiens]	S748	KPDsPPK	38788333	3×TMT6plex [N-Term; K7; K]; 1×Phospho [S4(100)]	38788333 1×Phospho [S748(100)]	0.0805072	0.00364838	1	1	4	38788333	38788333 [745-751]	0	1535.88	S4(Phospho): 100	1.81	1.07	1.52	1.48	1.4	1.6							3.37137	High	0.000867	0.01454	4.45	High	0.003755	1	S4(Phospho): 100	S4;	38788333	NP_057662.3	SRKKKPDsPPKVLEP	Yes
PPIP5K1	9677	inositol hexakisphosphate and diphosphoinositol-pentakisphosphate kinase 1 isoform 5 [Homo sapiens]	S1152	TLHsPPLQLQQR	195947359	1×TMT6plex [N-Term]; 1×Phospho [S4(100)]	195947359 1×Phospho [S1152(100)]	0.000540985	0.000193352	1	3	4	298231207; 195947361; 195947359	195947359 [1149-1160]	0	1726.92	S4(Phospho): 100	1.74	2.27	1.07	1.36	1.15	0.99	1.26	1.07	1.01	0.95	0.99	0.82	4.2276	High	5.93e-05	0.0002498	40.39	High	8.27e-05	1	S4(Phospho): 100	S4;	195947359	NP_001124330.1	SPPRTLHsPPLQLQQ	Yes
EHBP1L1	254102	EH domain-binding protein 1-like protein 1 [Homo sapiens]	S964	VLEsPENK	150378549	2×TMT6plex [N-Term; K8]; 1×Phospho [S4(100)]	150378549 1×Phospho [S964(100)]	0.090397	0.00411764	1	1	3	150378549	150378549 [961-968]	0	1453.77	S4(Phospho): 100	1.56	1.36	1.53	1.35	1.94	1.57							3.13438	High	0.0009536	0.01647	12.24	High	0.007284	1	S4(Phospho): 100	S4;	150378549	NP_001092879.1	AEMKVLEsPENKSGT	Yes
AHNAK	79026	neuroblast differentiation-associated protein AHNAK isoform 1 [Homo sapiens]	S5851	LQGsGVSLASK	61743954	2×TMT6plex [N-Term; K11]; 1×Phospho [S4(100)]	61743954 1×Phospho [S5851(100)]	0.00322879	0.00036439	1	1	4	61743954	61743954 [5848-5858]	0	1584.88	S4(Phospho): 100	1.41	0.97	1.95	2.12	1.58	1.2							3.64848	High	0.0001218	0.0005938	34.13	High	0.0001622	1	S4(Phospho): 100	S4;	61743954	NP_001611.1	ETGKLQGsGVSLASK	Yes
BCAR3	8412	breast cancer anti-estrogen resistance protein 3 isoform 1 [Homo sapiens]	S338	AHQsESYLPIGCK	387157906	2×TMT6plex [N-Term; K13]; 1×Carbamidomethyl [C12]; 1×Phospho [S4(100)]	387157906 1×Phospho [S338(100)]	7.1e-05	9e-05	1	3	11	387157906; 815891262; 387157911	387157906 [335-347]	0	2028	S4(Phospho): 100	0.89	1.66	1.58	1.09	2.03	1.45	0.63	1.52	1.53	1.03	1.64	1.23	5.02032	High	2.03e-05	3.02e-05	26.23	High	3.2e-05	1	S4(Phospho): 100	S4;	387157906	NP_001248337.1	LSLKAHQsESYLPIG	Yes
GMIP	51291	GEM-interacting protein isoform 1 [Homo sapiens]	S437	SLDsPTSSPGAGTR	91208437	1×TMT6plex [N-Term]; 1×Phospho [S4(100)]	91208437 1×Phospho [S437(100)]	0.00804328	0.000595922	1	1	6	91208437	91208437 [434-447]	0	1641.77	S4(Phospho): 100	0.73	0.77	1.08	2.01	1.69	1.28	0.75	1	1.11	1.23	1.01	1	2.76702	High	0.0001561	0.001346	14.26	High	0.0003887	1	S4(Phospho): 100	S4;	91208437	NP_057657.2	SESRSLDsPTSSPGA	Yes
PRRC2C	23215	protein PRRC2C [Homo sapiens]	S187	AAGsPSSSDQDEKLPGQDESTAGTSEQNDILK	115298682	3×TMT6plex [N-Term; K13; K32]; 1×Deamidated [Q]; 1×Phospho [S4(93.9)]	115298682 1×Phospho [S187(93.9)]	0.00504063	0.000429788	1	1	5	115298682	115298682 [184-215]	1	4030.92	S4(Phospho): 93.94	1.48	2.02	1.46	0.91	1.17	1.44							3.37521	High	0.0001218	0.0008735	15.38	High	0.0001777	1	S4(Phospho): 93.94	S4;	115298682	NP_055987.2	DGGKAAGsPSSSDQD	Yes
SAMD4A	23034	protein Smaug homolog 1 isoform 1 [Homo sapiens]	S420	AYSsPSTTPEAR	341865548	1×TMT6plex [N-Term]; 1×Phospho [S4(98.3)]	341865548 1×Phospho [S420(98.3)]	0.013945	0.000848975	1	3	21	341865548; 239582751; 341865550	341865548 [417-428]	0	1575.73	S4(Phospho): 98.28	1.66	1.34	1.05	2.59	0.92	1.09	1.36	1.3	0.94	2.26	0.84	1.02	3.32875	High	0.0002202	0.002308	22.75	High	0.000769	1	S4(Phospho): 98.28	S4;	341865548	NP_056404.4	TPIKAYSsPSTTPEA	Yes
AKAP12	9590	A-kinase anchor protein 12 isoform 1 [Homo sapiens]	S283	SAEsPTSPVTSETGSTFK	21493022	2×TMT6plex [N-Term; K18]; 1×Phospho [S4(100)]	21493022 1×Phospho [S283(100)]	7.04e-05	9e-05	1	2	56	21493022; 21493024	21493022 [280-297]	0	2351.14	S4(Phospho): 98.82	1.07	1.83	2.67	1.73	1.05	1.89	1.26	2.05	3.07	3.15	1.21	2.09	5.73247	High	2.03e-05	4.03e-05	54.26	High	2.27e-05	1	S4(Phospho): 98.82	S4;	21493022	NP_005091.2	EPSKSAEsPTSPVTS	Yes
CTTN	2017	src substrate cortactin isoform a [Homo sapiens]	S418	LPSsPVYEDAASFK	20357552	2×TMT6plex [N-Term; K14]; 1×Phospho [S4(100)]	20357552 1×Phospho [S418(100)]	0.000235525	0.000147488	1	3	142	296080746; 20357556; 20357552	20357552 [415-428]	0	2049.03	S4(Phospho): 99.29	2.62	1.56	1.13	1.19	0.83	1.26	2.63	1.76	1.23	1.4	0.96	1.49	5.33874	High	5.93e-05	0.0001915	51.73	High	8.27e-05	1	S4(Phospho): 99.29	S4;	20357552	NP_005222.2	TEERLPSsPVYEDAA	Yes
MARCKS	4082	myristoylated alanine-rich C-kinase substrate [Homo sapiens]	S147	EAPAEGEAAEPGSPTAAEGEAASAASSTSSPKAEDGATPSPsNETPK	153070260	3×TMT6plex [N-Term; K32; K47]; 1×Deamidated [N43]; 1×Phospho [S42(97)]	153070260 1×Phospho [S147(97)]	0.00256045	0.000314125	1	1	9	153070260	153070260 [106-152]	1	5165.41	S42(Phospho): 97	1.03	2.62	1.57	1.17	1.38	1.49							3.16896	High	0.0001016	0.0004918	16.11	High	0.0001854	1	S42(Phospho): 97	S42;	153070260	NP_002347.5	DGATPSPsNETPKKK	Yes
ZNF532	55205	zinc finger protein 532 [Homo sapiens]	S314	AADKsPESQNLIDGTK	24429588	3×TMT6plex [N-Term; K4; K16]; 1×Phospho [S5(100)]	24429588 1×Phospho [S314(100)]	0.00147937	0.000236062	1	1	2	24429588	24429588 [310-325]	1	2441.29	S5(Phospho): 100	2.2	1.34	1.77	0.76	0.57	0.83							4.08647	High	7.18e-05	0.0003174	18.97	High	0.0001961	1	S5(Phospho): 100	S5;	24429588	NP_060651.2	SPRAADKsPESQNLI	Yes
MYSM1	114803	histone H2A deubiquitinase MYSM1 [Homo sapiens]	S218	IEKLsDDEEVDITDEVDELSSQTPQK	148227842	3×TMT6plex [N-Term; K3; K26]; 1×Phospho [S5(100)]	148227842 1×Phospho [S218(100)]	4.41e-05	6.55e-05	1	1	6	148227842	148227842 [214-239]	1	3729.85	S5(Phospho): 100	1.58	0.85	2.01	0.6	1.48	0.93	1.59	1.41	1.44	0.94	1.06	0.8	7.17912	High	1.3e-05	1.89e-05	35.99	High	6.51e-05	1	S5(Phospho): 100	S5;	148227842	NP_001078956.1	AVKIEKLsDDEEVDI	Yes
KIF21A	55605	kinesin-like protein KIF21A isoform 1 [Homo sapiens]	S1212	EKELsPPPGLPSK	291167762	3×TMT6plex [N-Term; K2; K13]; 1×Phospho [S5(100)]	291167762 1×Phospho [S1212(100)]	0.000858935	0.000193352	1	4	10	291167762; 291167760; 38569484; 291167764	291167762 [1208-1220]	1	2146.21	S5(Phospho): 100	1.38	1.19	1.47	1.77	1.86	1.96	1.82	1.5	2.43	1.52	2.14	1.8	3.49345	High	9.7e-05	0.0004624	15.88	High	0.0001121	1	S5(Phospho): 100	S5;	291167762	NP_001166935.1	SAREKELsPPPGLPS	Yes
TRIM25	7706	E3 ubiquitin/ISG15 ligase TRIM25 [Homo sapiens]	S100	ASAPsPNAQVACDHCLK	68160937	2×TMT6plex [N-Term; K17]; 1×Deamidated [N7; Q]; 2×Carbamidomethyl [C12; C15]; 1×Phospho [S5(100)]	68160937 1×Phospho [S100(100)]	4.9e-05	6.55e-05	1	1	4	68160937	68160937 [96-112]	0	2365.11	S5(Phospho): 100	1.36	2.16	1.19	1.13	1.36	1.07	1.1	1.56	0.99	1.29	0.95	0.98	6.63699	High	1.3e-05	2.2e-05	49.33	High	2.27e-05	1	S5(Phospho): 100	S5;	68160937	NP_005073.2	PARASAPsPNAQVAC	Yes
HSP90AB1	3326	heat shock protein HSP 90-beta isoform a [Homo sapiens]	S226	EKEIsDDEAEEEK	431822401	3×TMT6plex [N-Term; K2; K13]; 1×Phospho [S5(100)]	431822401 1×Phospho [S226(100)]	0.00138958	0.000236062	1	3	43	431822401; 431822408; 431822406	431822401 [222-234]	1	2318.13	S5(Phospho): 100	1.28	0.91	1.5	1.37	2.2	1.78	1.34	1.09	1.87	1.86	2.93	2.01	5.03856	High	0.0001488	0.001234	33.35	High	0.0003244	1	S5(Phospho): 100	S5;	431822401	NP_001258898.1	KEREKEIsDDEAEEE	Yes
MAP4K4	9448	mitogen-activated protein kinase kinase kinase kinase 4 isoform 2 [Homo sapiens]	S549	TNHSsPEAQSK	336020355	2×TMT6plex [N-Term; K11]; 1×Phospho [S5(100)]	336020355 1×Phospho [S549(100)]	0.000313461	0.000147488	1	3	5	336020358; 22035606; 336020355	336020355 [545-555]	0	1723.84	S5(Phospho): 100	1.07	0.78	0.73	0.53	1.33	2.59	1.3	1.55	1.03	0.57	0.98	1.87	4.01012	High	2.62e-05	0.0001045	31.05	High	6.51e-05	1	S5(Phospho): 100	S5;	336020355	NP_663719.2	FRKTNHSsPEAQSKQ	No
SHROOM3	57619	protein Shroom3 [Homo sapiens]	S910	DRPGsPESPLLDAPFSR	203098098	1×TMT6plex [N-Term]; 1×Phospho [S5(100)]	203098098 1×Phospho [S910(100)]	0.00111227	0.000214298	1	1	2	203098098	203098098 [906-922]	0	2150.05	S5(Phospho): 100	0.95	1.18	0.76	2.51	1.19	1.03							4.28881	High	6.44e-05	0.0002554	31.44	High	0.0001165	1	S5(Phospho): 100	S5;	203098098	NP_065910.3	EWRDRPGsPESPLLD	Yes
LIN52	91750	protein lin-52 homolog [Homo sapiens]	S28	LDRAsPDLWPEQLPGVAEFAASFK	67003578	2×TMT6plex [N-Term; K24]; 1×Phospho [S5(100)]	67003578 1×Phospho [S28(100)]	0.00026246	0.000147488	1	1	4	67003578	67003578 [24-47]	1	3182.63	S5(Phospho): 100	0.92	1.08	1.63	1.03	1.45	1.49							5.36073	High	2.03e-05	8.25e-05	28.31	High	0.0001716	1	S5(Phospho): 100	S5;	67003578	NP_001019845.1	FEKLDRAsPDLWPEQ	Yes
NOL4L	140688	nucleolar protein 4-like isoform 1 [Homo sapiens]	S374	TTPEsPPYSSGSYDSIK	378404903	2×TMT6plex [N-Term; K17]; 1×Phospho [S5(100)]	378404903 1×Phospho [S374(100)]	0.000131585	9e-05	1	2	2	378404903; 193788697	378404903 [370-386]	0	2354.12	S5(Phospho): 100	0.78	0.99	0.87	0.94	1.52	2.37							5.29118	High	2.03e-05	4.61e-05	37.93	High	5.72e-05	1	S5(Phospho): 100	S5;	378404903	NP_001243727.1	GVKTTPEsPPYSSGS	No
PTDSS1	9791	phosphatidylserine synthase 1 isoform 1 [Homo sapiens]	S442	GSEDsPPKHAGNNESHSSR	7662647	2×TMT6plex [N-Term; K8]; 1×Deamidated [N]; 1×Phospho [S5(100)]	7662647 1×Phospho [S442(100)]	6.36e-05	6.55e-05	1	2	22	7662647; 589811544	7662647 [438-456]	1	2532.15	S5(Phospho): 98.82	2.07	1.84	0.73	0.69	0.9	0.89	2.14	1.98	0.77	0.78	1	0.93	6.59181	High	1.3e-05	2.78e-05	28.36	High	2.27e-05	1	S5(Phospho): 98.82	S5;	7662647	NP_055569.1	GTKGSEDsPPKHAGN	Yes
RBL1	5933	retinoblastoma-like protein 1 isoform a [Homo sapiens]	S368	SFAPsTPLTGR	34577079	1×TMT6plex [N-Term]; 1×Phospho [S5(99)]	34577079 1×Phospho [S368(99)]	0.0408701	0.00203291	1	2	6	34577077; 34577079	34577079 [364-374]	0	1442.72	S5(Phospho): 98.99	1.03	1.63	2.1	1.51	1.39	1.75	0.81	1.16	1.74	0.98	1.18	1.41	1.58759	High	0.0006865	0.01037	8.43	High	0.0006237	1	S5(Phospho): 98.99	S5;	34577079	NP_002886.2	KKRSFAPsTPLTGRR	Yes
TBC1D4	9882	TBC1 domain family member 4 isoform 1 [Homo sapiens]	S570	SLTSsLENIFSR	114688046	1×TMT6plex [N-Term]; 1×Phospho [S5(99)]	114688046 1×Phospho [S570(99)]	0.00408279	0.000383028	1	3	4	114688046; 557786174; 557786188	114688046 [566-577]	0	1662.83	S5(Phospho): 99.05	2.24	2	1.51	0.67	0.6	1.53	2.22	1.66	1.11	0.71	0.91	1.16	3.18242	High	0.0003642	0.00457	23.11	High	0.0001662	1	S5(Phospho): 99.05	S5;	114688046	NP_055647.2	AKRSLTSsLENIFSR	Yes
ARHGEF2	9181	rho guanine nucleotide exchange factor 2 isoform 1 [Homo sapiens]	S122	ERPSsAIYPSDSFR	253735775	1×TMT6plex [N-Term]; 1×Phospho [S5(99.1)]	253735775 1×Phospho [S122(99.1)]	0.0250267	0.00139708	1	3	4	15011974; 253735778; 253735775	253735775 [118-131]	0	1920.91	S5(Phospho): 99.1	1.08	2.02	1.01	1.12	1.21	1.12							3.26036	High	0.0003387	0.00415	5.3	High	0.0008349	1	S5(Phospho): 99.1	S5;	253735775	NP_001155855.1	TIRERPSsAIYPSDS	Yes
LARP1	23367	la-related protein 1 [Homo sapiens]	S471	GLSAsLPDLDSENWIEVK	39725634	2×TMT6plex [N-Term; K18]; 1×Deamidated [N13]; 1×Phospho [S5(99.1)]	39725634 1×Phospho [S471(99.1)]	0.000117394	9e-05	1	1	21	39725634	39725634 [467-484]	0	2512.26	S5(Phospho): 99.11	1.43	2.16	1.46	0.99	1.3	1.01	1.13	1.48	1.12	1.13	1.07	1	6.05071	High	2.03e-05	6.5e-05	44.07	High	8.36e-05	1	S5(Phospho): 99.11	S5;	39725634	NP_056130.2	LPKGLSAsLPDLDSE	No
MTDH	92140	protein LYRIC [Homo sapiens]	S308	WNSVsPASAGK	223555917	2×TMT6plex [N-Term; K11]; 1×Phospho [S5(100)]	223555917 1×Phospho [S308(100)]	0.00102358	0.000214298	1	1	6	223555917	223555917 [304-314]	0	1641.84	S5(Phospho): 99.37	1.8	1.76	1.73	1.32	3.16	1.9							3.69753	High	0.0001218	0.0006131	40.26	High	8.36e-05	1	S5(Phospho): 99.37	S5;	223555917	NP_848927.2	EEKWNSVsPASAGKR	Yes
SIRT1	23411	NAD-dependent protein deacetylase sirtuin-1 isoform a [Homo sapiens]	S27	EAASsPAGEPLR	7657575	1×TMT6plex [N-Term]; 1×Phospho [S5(100)]	7657575 1×Phospho [S27(100)]	0.0063462	0.000523051	1	1	19	7657575	7657575 [23-34]	0	1493.72	S5(Phospho): 99.99	1.49	1.24	1.51	1.25	1.09	1.87	1.62	1.24	1.37	0.86	1.07	1.4	4.20856	High	0.0001371	0.001076	24.12	High	0.0004302	1	S5(Phospho): 99.99	S5;	7657575	NP_036370.2	ADREAASsPAGEPLR	Yes
POLR3G	10622	DNA-directed RNA polymerase III subunit RPC7 [Homo sapiens]	S157	GDGEKsDEENEEK	115529475	3×TMT6plex [N-Term; K5; K13]; 1×Phospho [S6(100)]	115529475 1×Phospho [S157(100)]	0.015552	0.000941371	1	1	4	115529475	115529475 [152-164]	1	2233.05	S6(Phospho): 100	2.4	0.95	1.64	0.97	1.37	1.6	2.49	0.9	1.94	1.01	1.62	1.68	3.11437	High	0.0002348	0.002573	7.35	High	0.0004235	1	S6(Phospho): 100	S6;	115529475	NP_006458.2	KRGDGEKsDEENEEK	Yes
UNC13B	10497	protein unc-13 homolog B [Homo sapiens]	S1251	GTGNAsPDAR	110611226	1×TMT6plex [N-Term]; 1×Phospho [S6(100)]	110611226 1×Phospho [S1251(100)]	0.0700003	0.00330824	1	1	2	110611226	110611226 [1246-1255]	0	1254.57	S6(Phospho): 100	2.38	1.69	1.75	0.94	0.8	1.23							2.67981	High	0.001044	0.01803	19.19	High	0.0007817	1	S6(Phospho): 100	S6;	110611226	NP_006368.3	VRGTGNAsPDARASA	Yes
TBC1D4	9882	TBC1 domain family member 4 isoform 1 [Homo sapiens]	S666	AQGVRsPLLR	114688046	1×TMT6plex [N-Term]; 1×Phospho [S6(100)]	114688046 1×Phospho [S666(100)]	0.0668028	0.00316123	1	3	4	114688046; 557786174; 557786188	114688046 [661-670]	1	1405.79	S6(Phospho): 100	2.27	1.57	0.88	0.68	0.69	1.71	3.51	2.36	1.46	1.05	1.54	2.74	2.39451	High	0.001306	0.02319	9.22	High	0.001242	1	S6(Phospho): 100	S6;	114688046	NP_055647.2	GRAQGVRsPLLRQSS	Yes
ZNF800	168850	zinc finger protein 800 [Homo sapiens]	S647	ANASNsPEGNK	39753953	2×TMT6plex [N-Term; K11]; 1×Deamidated [N2]; 1×Phospho [S6(100)]	39753953 1×Phospho [S647(100)]	0.00184384	0.000236062	1	1	4	39753953	39753953 [642-652]	0	1627.77	S6(Phospho): 100	2.01	0.98	1.47	0.72	1.1	1.28	2.49	1.12	1.75	0.95	1.45	1.64	3.1923	High	7.41e-05	0.0003782	42.63	High	0.0001196	1	S6(Phospho): 100	S6;	39753953	NP_789784.2	HKANASNsPEGNKTK	Yes
ADNP	23394	activity-dependent neuroprotector homeobox protein [Homo sapiens]	S953	LMHNAsDSEVDQDDVVEWK	542133157	2×TMT6plex [N-Term; K19]; 1×Phospho [S6(100)]	542133157 1×Phospho [S953(100)]	4.33e-05	6.55e-05	1	1	8	542133157	542133157 [948-966]	0	2755.27	S6(Phospho): 100	1.96	1.23	1.04	1.2	2.17	1.02	1.43	0.84	0.93	0.86	1.3	0.9	7.44694	High	0	1.79e-05	49	High	2.27e-05	1	S6(Phospho): 100	S6;	542133157	NP_001269460.1	TKLMHNAsDSEVDQD	Yes
UTP20	27340	small subunit processome component 20 homolog [Homo sapiens]	S788	SVGDEsWEQTQEGDVGALYHEQLALK	120587023	2×TMT6plex [N-Term; K26]; 3×Deamidated [Q9; Q11; Q22]; 1×Phospho [S6(100)]	120587023 1×Phospho [S788(100)]	0.000323413	0.000147488	1	1	2	120587023	120587023 [783-808]	0	3430.6	S6(Phospho): 100	1.77	1.3	1.18	1.14	1.38	1.86							4.87196	High	2.62e-05	9.89e-05	26.92	High	8.27e-05	1	S6(Phospho): 100	S6;	120587023	NP_055318.2	EKSVGDEsWEQTQEG	Yes
AHCTF1	25909	protein ELYS [Homo sapiens]	S1522	LPISDsPPDTQEIHVIEQEK	262359929	2×TMT6plex [N-Term; K20]; 1×Phospho [S6(100)]	262359929 1×Phospho [S1522(100)]	4.27e-05	6.55e-05	1	1	11	262359929	262359929 [1517-1536]	0	2813.44	S6(Phospho): 100	1.61	1.6	1.44	1.17	1.25	1	1.53	2.29	1.68	0.94	1.56	0.99	7.81112	High	0	1.32e-05	39.52	High	2.27e-05	1	S6(Phospho): 100	S6;	262359929	NP_056261.4	EKLPISDsPPDTQEI	No
WBP4	11193	WW domain-binding protein 4 [Homo sapiens]	S262	NSDGGsDPETQKEK	6005948	3×TMT6plex [N-Term; K12; K14]; 1×Phospho [S6(100)]	6005948 1×Phospho [S262(100)]	0.000801678	0.000193352	1	1	4	6005948	6005948 [257-270]	1	2259.11	S6(Phospho): 100	1.59	0.7	1.51	0.92	1.49	2.55	1.21	0.47	0.93	0.78	1.1	1.91	3.37066	High	5.93e-05	0.0001994	5.22	High	0.0003887	1	S6(Phospho): 100	S6;	6005948	NP_009118.1	NKNSDGGsDPETQKE	Yes
MARCKS	4082	myristoylated alanine-rich C-kinase substrate [Homo sapiens]	S46	VNGDAsPAAAESGAK	153070260	2×TMT6plex [N-Term; K15]; 1×Phospho [S6(100)]	153070260 1×Phospho [S46(100)]	0.12915	0.00652084	1	1	2	153070260	153070260 [41-55]	0	1882.93	S6(Phospho): 100	1.4	2	1.51	1.43	1.59	3.27							2.09777	High	0.002023	0.03849	6.38	High	0.001452	1	S6(Phospho): 100	S6;	153070260	NP_002347.5	VKVNGDAsPAAAESG	Yes
HIRIP3	8479	HIRA-interacting protein 3 isoform 1 [Homo sapiens]	S227	ESEQEsEEEILAQK	21396500	2×TMT6plex [N-Term; K14]; 1×Phospho [S6(100)]	21396500 1×Phospho [S227(100)]	0.000600192	0.000193352	1	1	4	21396500	21396500 [222-235]	0	2187.05	S6(Phospho): 100	1.38	1.31	1.48	1.69	1.7	1.45							4.6557	High	5.25e-05	0.0001608	23.92	High	0.0001716	1	S6(Phospho): 100	S6;	21396500	NP_003600.2	LKESEQEsEEEILAQ	Yes
TFPI2	7980	tissue factor pathway inhibitor 2 isoform 1 precursor [Homo sapiens]	S168	DEGLCsANVTR	5730091	1×TMT6plex [N-Term]; 1×Carbamidomethyl [C5]; 1×Phospho [S6(100)]	5730091 1×Phospho [S168(100)]	0.00983536	0.000765738	1	2	4	5730091; 401871059	5730091 [163-173]	0	1530.68	S6(Phospho): 100	1.31	1.68	0.97	1.78	1.51	6.8	1.17	1.49	0.8	1.24	1.11	4.41	3.10076	High	0.0001912	0.001631	13.86	High	0.0003777	1	S6(Phospho): 100	S6;	5730091	NP_006519.1	PKDEGLCsANVTRYY	No
HSP90AB1	3326	heat shock protein HSP 90-beta isoform a [Homo sapiens]	S255	IEDVGsDEEDDSGK	431822401	2×TMT6plex [N-Term; K14]; 1×Phospho [S6(100)]	431822401 1×Phospho [S255(100)]	0.000117925	9e-05	1	3	226	431822401; 431822408; 431822406	431822401 [250-263]	0	2032.9	S6(Phospho): 100	1.29	0.96	1.59	1.45	2.08	1.49	1.26	0.94	1.63	1.39	2.08	1.6	5.36958	High	5.93e-05	0.0001933	80.54	High	6.51e-05	1	S6(Phospho): 100	S6;	431822401	NP_001258898.1	PKIEDVGsDEEDDSG	Yes
EGFR	1956	epidermal growth factor receptor isoform a precursor [Homo sapiens]	S1166	GSHQIsLDNPDYQQDFFPK	29725609	2×TMT6plex [N-Term; K19]; 2×Deamidated [Q/N]; 1×Phospho [S6(100)]	29725609 1×Phospho [S1166(100)]	0.000552204	0.000193352	1	1	12	29725609	29725609 [1161-1179]	0	2776.29	S6(Phospho): 100	0.88	1.28	1.06	2.09	1.41	0.97	0.49	0.64	0.79	1.17	0.8	0.51	5.73081	High	5.25e-05	0.000151	33.19	High	0.0001068	1	S6(Phospho): 100	S6;	29725609	NP_005219.2	QKGSHQIsLDNPDYQ	Yes
CDC42EP4	23580	cdc42 effector protein 4 [Homo sapiens]	S11	QLVSSsVHSK	13786127	2×TMT6plex [N-Term; K10]; 1×Phospho [S6(100)]	13786127 1×Phospho [S11(100)]	0.00353854	0.000383028	1	1	8	13786127	13786127 [6-15]	0	1609.87	S6(Phospho): 100	0.73	0.71	1.59	0.71	2.39	0.64	0.78	0.7	1.2	0.7	1.61	0.6	3.94862	High	0.0001912	0.001645	31.29	High	0.0001505	1	S6(Phospho): 100	S6;	13786127	NP_036253.2	LKQLVSSsVHSKRRS	Yes
LYN	4067	tyrosine-protein kinase Lyn isoform A [Homo sapiens]	S13	GKDSLsDDGVDLK	4505055	3×TMT6plex [N-Term; K2; K13]; 1×Phospho [S6(100)]	4505055 1×Phospho [S13(100)]	0.00426716	0.000383028	1	2	8	4505055; 162287326	4505055 [8-20]	1	2116.11	S6(Phospho): 100	0.68	2.39	1.36	1.96	1.79	1.44	0.75	1.97	1.24	2.35	2.32	1.63	3.80032	High	0.0001371	0.001103	40.29	High	0.0001583	1	S6(Phospho): 100	S6;	4505055	NP_002341.1	SKGKDSLsDDGVDLK	Yes
BYSL	705	bystin [Homo sapiens]	S98	MPQDGsDDEDEEWPTLEK	51173724	2×TMT6plex [N-Term; K18]; 1×Oxidation [M1]; 1×Phospho [S6(100)]	51173724 1×Phospho [S98(100)]	0.00381127	0.000383028	1	1	6	51173724	51173724 [93-110]	0	2675.15	S6(Phospho): 100	0.67	1.67	1.8	1.55	2.05	1.67	1.51	1.85	1.88	1.55	2.59	2.33	3.42931	High	0.0001218	0.0006836	27.59	High	0.0001961	1	S6(Phospho): 100	S6;	51173724	NP_004044.3	PRMPQDGsDDEDEEW	Yes
C1orf106	55765	uncharacterized protein C1orf106 isoform 1 [Homo sapiens]	S619	STRPHsLDR	340745328	1×TMT6plex [N-Term]; 1×Phospho [S6(100)]	340745328 1×Phospho [S619(100)]	0.12915	0.00652084	1	2	3	340745328; 217035133	340745328 [614-622]	0	1377.68	S6(Phospho): 100	0.59	0.55	0.6	1.25	3.14	1.14	0.53	0.39	0.43	0.97	2.32	0.86	3.07544	High	0.001671	0.03087	5.31	High	0.003907	1	S6(Phospho): 100	S6;	340745328	NP_060735.3	LRSTRPHsLDRQGAF	No
NFIC	4782	nuclear factor 1 C-type isoform 1 [Homo sapiens]	S333; S339	TEMDKsPFNSPsPQDSPR	350529396	2×TMT6plex [N-Term; K5]; 2×Phospho [S6(100); S12(100)]	350529396 2×Phospho [S333(100); S339(100)]	0.00669559	0.000523051	1	5	6	350529401; 350529396; 45505151; 350529405; 45505149	350529396 [328-345]	1	2638.17	S6(Phospho): 100; S12(Phospho): 100	1.31	1.04	1.39	0.76	0.9	1.27	1.53	1.44	1.44	1.02	0.89	1.55	3.96107	High	0.0001488	0.001131	13.4	High	0.0003519	1	S6(Phospho): 100; S12(Phospho): 100	S6; S12;	350529396	NP_001231931.1	KKTEMDKsPFNSPSP;KSPFNSPsPQDSPRL	Yes;Yes
MYPN	84665	myopalladin isoform a [Homo sapiens]	S644	TPEPSsPVKEPPPVLAKPK	372220097	4×TMT6plex [N-Term; K9; K17; K19]; 1×Phospho [S/T]		0.000177876	0.00012481	1	2	12	372220099; 372220097	372220097 [639-657]	1	2994.75	S6(Phospho): 98.48	0.89	1.6	0.79	1.4	0.69	1.34	1.45	2.53	1.19	2.01	0.73	2.08	5.71901	High	2.03e-05	6.01e-05	8.38	High	0.0001196	1	S6(Phospho): 98.48	S6;	372220097	NP_001243196.1	TKTPEPSsPVKEPPP	Yes
EIF4G1	1981	eukaryotic translation initiation factor 4 gamma 1 isoform 6 [Homo sapiens]	S1084	ITKPGsIDSNNQLFAPGGR	302699245	2×TMT6plex [N-Term; K3]; 1×Phospho [S6(100)]	302699245 1×Phospho [S1084(100)]	0.00115153	0.000214298	1	7	4	38201625; 302699239; 302699237; 38201623; 302699245; 599045674; 38201627	302699245 [1079-1097]	0	2510.32	S6(Phospho): 98.59	0.94	0.83	2.01	1.54	1.41	1.08	0.89	0.78	1.39	0.94	0.86	0.53	4.4273	High	6.84e-05	0.0002623	15.22	High	0.0002223	1	S6(Phospho): 98.59	S6;	302699245	NP_001181875.1	TKITKPGsIDSNNQL	No
SPAG9	9043	C-Jun-amino-terminal kinase-interacting protein 4 isoform 1 [Homo sapiens]	S733	SASQSsLDKLDQELK	194578923	3×TMT6plex [N-Term; K9; K15]; 1×Deamidated [Q]; 1×Phospho [S6(99.2)]	194578923 1×Phospho [S733(99.2)]	0.00711462	0.000523051	1	4	11	354681995; 194578923; 194578921; 27436920	194578923 [728-742]	1	2417.28	S6(Phospho): 98.83	1.9	1.7	1.5	2.54	0.77	1.48	1.86	1.04	1.64	3.41	0.95	1.11	3.43616	High	0.0001488	0.0012	10.47	High	0.0002024	1	S6(Phospho): 98.83	S6;	194578923	NP_001124000.1	QRSASQSsLDKLDQE	Yes
SRPK1	6732	SRSF protein kinase 1 [Homo sapiens]	S311	QEESEsPVERPLK	47419936	2×TMT6plex [N-Term; K13]; 1×Phospho [S6(98.9)]	47419936 1×Phospho [S311(98.9)]	0.00463552	0.000406702	1	1	5	47419936	47419936 [306-318]	0	2066.06	S6(Phospho): 98.93	1.7	1.13	1.76	1.76	2.62	1.54	1.97	1.21	1.96	1.76	2.75	1.91	3.34422	High	0.0001218	0.0008112	8.45	High	0.0002374	1	S6(Phospho): 98.93	S6;	47419936	NP_003128.3	NKQEESEsPVERPLK	Yes
ADNP	23394	activity-dependent neuroprotector homeobox protein [Homo sapiens]	S953	LMHNAsDSEVDQDDVVEWK	542133157	2×TMT6plex [N-Term; K19]; 1×Oxidation [M2]; 1×Phospho [S6(99)]	542133157 1×Phospho [S953(99)]	9.43e-05	9e-05	1	1	4	542133157	542133157 [948-966]	0	2771.26	S6(Phospho): 98.98	2.23	1.82	1.43	1.77	1.46	1.77							4.96793	High	2.03e-05	3.65e-05	25.24	High	7.92e-05	1	S6(Phospho): 98.98	S6;	542133157	NP_001269460.1	TKLMHNAsDSEVDQD	Yes
PAPOLA	10914	poly(A) polymerase alpha isoform 1 [Homo sapiens]	S24	HYGITsPISLAAPK	32490557	2×TMT6plex [N-Term; K14]; 1×Phospho [S6(99.2)]	32490557 1×Phospho [S24(99.2)]	0.00074579	0.000193352	1	4	10	354681991; 32490557; 651166638; 354681993	32490557 [19-32]	0	1993.09	S6(Phospho): 99.15	1.36	0.93	1.15	1.73	2.03	1.51	1.2	0.95	1.19	1.26	1.64	1.21	4.31942	High	5.93e-05	0.0001893	24	High	8.27e-05	1	S6(Phospho): 99.15	S6;	32490557	NP_116021.2	QKHYGITsPISLAAP	Yes
MAGEC2	51438	melanoma-associated antigen C2 [Homo sapiens]	S293	EVPHSsPPYYEFLWGPR	7706605	1×TMT6plex [N-Term]; 1×Phospho [S6(100)]	7706605 1×Phospho [S293(100)]	5.51e-05	6.55e-05	1	1	15	7706605	7706605 [288-304]	0	2370.12	S6(Phospho): 99.99	4.99	1.81	0.69	1.37	0.96	1	2.54	1.16	0.82	0.87	0.95	0.85	5.74326	High	1.3e-05	2.47e-05	30.76	High	2.27e-05	1	S6(Phospho): 99.99	S6;	7706605	NP_057333.1	YREVPHSsPPYYEFL	Yes
ESF1	51575	ESF1 homolog [Homo sapiens]	S657	ALAEEAsEEELPSDVDLNDPYFAEEVK	18093112	2×TMT6plex [N-Term; K27]; 1×Deamidated [N18]; 1×Phospho [S7(100)]	18093112 1×Phospho [S657(100)]	4.57e-05	6.55e-05	1	1	3	18093112	18093112 [651-677]	0	3548.65	S7(Phospho): 100	2.75	1.2	0.91	1.77	1.54	1.63							5.72727	High	1.3e-05	2.02e-05	49	High	1.91e-05	1	S7(Phospho): 100	S7;	18093112	NP_057733.2	KALAEEAsEEELPSD	Yes
MDC1	9656	mediator of DNA damage checkpoint protein 1 [Homo sapiens]	S1820	SLATMDsPPHQK	132626688	2×TMT6plex [N-Term; K12]; 1×Phospho [S7(100)]	132626688 1×Phospho [S1820(100)]	0.00122904	0.000214298	1	1	6	132626688	132626688 [1814-1825]	0	1849.93	S7(Phospho): 100	2.26	1.48	1.18	1	0.95	1.16	2.74	1.91	1.14	1.37	1.57	1.29	3.54804	High	0.0001016	0.0004981	21.64	High	0.0001716	1	S7(Phospho): 100	S7;	132626688	NP_055456.2	RSLATMDsPPHQKQP	Yes
UTP18	51096	U3 small nucleolar RNA-associated protein 18 homolog [Homo sapiens]	S121	VQEHEDsGDSEVENEAK	118344456	2×TMT6plex [N-Term; K17]; 1×Phospho [S7(100)]	118344456 1×Phospho [S121(100)]	6.51e-05	6.55e-05	1	1	4	118344456	118344456 [115-131]	0	2440.09	S7(Phospho): 100	2.01	0.78	0.67	0.83	1.52	0.68	1.72	0.81	0.62	0.81	1.07	0.64	5.63241	High	1.3e-05	2.83e-05	38	High	2.27e-05	1	S7(Phospho): 100	S7;	118344456	NP_057085.2	RVQEHEDsGDSEVEN	Yes
MDC1	9656	mediator of DNA damage checkpoint protein 1 [Homo sapiens]	S168	LLLAEDsEEEVDFLSER	132626688	1×TMT6plex [N-Term]; 1×Phospho [S7(100)]	132626688 1×Phospho [S168(100)]	6.28e-05	6.55e-05	1	1	55	132626688	132626688 [162-178]	0	2303.09	S7(Phospho): 100	2.01	1.74	1.26	0.99	1.17	1.14	1.75	1.59	1.23	0.97	0.97	1.31	6.35653	High	1.3e-05	2.76e-05	77.44	High	2.27e-05	1	S7(Phospho): 100	S7;	132626688	NP_055456.2	RLLLAEDsEEEVDFL	Yes
ERC1	23085	ELKS/Rab6-interacting/CAST family member 1 isoform epsilon [Homo sapiens]	S17	VEPSSQsPGR	38045898	1×TMT6plex [N-Term]; 1×Phospho [S7(100)]	38045898 1×Phospho [S17(100)]	0.102195	0.004908	1	3	4	38045898; 38045896; 669174625	38045898 [11-20]	0	1352.64	S7(Phospho): 100	1.97	1.16	2.03	1.61	1.06	1.22	1.62	0.86	1.14	0.56	0.34	0.26	2.38634	High	0.008133	0.1751	14.84	High	0.001111	1	S7(Phospho): 100	S7;	38045898	NP_829884.1	KVEPSSQsPGRSPRL	Yes
LAMTOR1	55004	ragulator complex protein LAMTOR1 [Homo sapiens]	S27	LLLDPSsPPTK	8923579	2×TMT6plex [N-Term; K11]; 1×Phospho [S7(100)]	8923579 1×Phospho [S27(100)]	0.00651827	0.000523051	1	1	7	8923579	8923579 [21-31]	0	1705.95	S7(Phospho): 100	1.97	1.95	1.64	1.48	1.42	1.5							2.98145	High	0.0001524	0.001305	25.7	High	0.0001716	1	S7(Phospho): 100	S7;	8923579	NP_060377.1	KLLLDPSsPPTKALN	Yes
DNAJB6	10049	dnaJ homolog subfamily B member 6 isoform a [Homo sapiens]	S277	HAPHCLsEEEGEQDRPR	17388799	1×TMT6plex [N-Term]; 1×Carbamidomethyl [C5]; 1×Phospho [S7(100)]	17388799 1×Phospho [S277(100)]	7.58e-05	9e-05	1	1	22	17388799	17388799 [271-287]	0	2356.03	S7(Phospho): 100	1.76	1.47	2.19	1.23	0.94	1.57	1.43	1.31	2.08	1.49	1.17	1.59	5.90989	High	2.03e-05	3.17e-05	33.95	High	5.72e-05	1	S7(Phospho): 100	S7;	17388799	NP_490647.1	RHAPHCLsEEEGEQD	Yes
CASC4	113201	protein CASC4 isoform a [Homo sapiens]	S366	FFDENEsPVDPQHGSK	29826289	2×TMT6plex [N-Term; K16]; 1×Phospho [S7(100)]	29826289 1×Phospho [S366(100)]	0.000127565	9e-05	1	1	2	29826289	29826289 [360-375]	0	2371.1	S7(Phospho): 100	1.64	1.57	0.8	1.4	1.67	4.01							4.64749	High	2.03e-05	4.51e-05	35.91	High	6.51e-05	1	S7(Phospho): 100	S7;	29826289	NP_612432.2	RFFDENEsPVDPQHG	Yes
MYBBP1A	10514	myb-binding protein 1A isoform 1 [Homo sapiens]	S775	ALGGEDsENEEELGDEAMMALDQSLASLFAEQK	157694494	2×TMT6plex [N-Term; K33]; 1×Deamidated [Q23]; 2×Oxidation [M18; M19]; 1×Phospho [S7(100)]	157694494 1×Phospho [S775(100)]	8.78e-05	9e-05	1	2	2	157694492; 157694494	157694494 [769-801]	0	4098.83	S7(Phospho): 100	1.54	2.07	1.86	0.85	1.06	1.27							5.80843	High	2.03e-05	3.48e-05	45.18	High	6.51e-05	1	S7(Phospho): 100	S7;	157694494	NP_001099008.1	KALGGEDsENEEELG	Yes
MAP1B	4131	microtubule-associated protein 1B [Homo sapiens]	S2271	SKPLAAsPKPAGLK	153945728	4×TMT6plex [N-Term; K2; K9; K14]; 1×Phospho [S7(100)]	153945728 1×Phospho [S2271(100)]	0.0142514	0.000870764	1	1	2	153945728	153945728 [2265-2278]	0	2361.44	S7(Phospho): 100	1.5	4.74	1.54	1.06	0.97	1.12							4.41719	High	0.0002235	0.002356					S7(Phospho): 100	S7;	153945728	NP_005900.2	KSKPLAAsPKPAGLK	Yes
VASP	7408	vasodilator-stimulated phosphoprotein [Homo sapiens]	S305	VPAQSEsVR	4507869	1×TMT6plex [N-Term]; 1×Phospho [S7(100)]	4507869 1×Phospho [S305(100)]	0.0369559	0.00185874	1	1	3	4507869	4507869 [299-307]	0	1281.64	S7(Phospho): 100	1.34	1.5	2.8	1.76	1.26	1.2	1.04	1.47	3.06	1.69	1.16	0.89	2.49977	High	0.001529	0.02834	27.51	High	0.0004273	1	S7(Phospho): 100	S7;	4507869	NP_003361.1	RVPAQSEsVRRPWEK	Yes
HTATSF1	27336	HIV Tat-specific factor 1 [Homo sapiens]	S579	DLDEEGsEK	21361437	2×TMT6plex [N-Term; K9]; 1×Phospho [S7(100)]	21361437 1×Phospho [S579(100)]	0.0132575	0.000802252	1	1	14	21361437	21361437 [573-581]	0	1559.72	S7(Phospho): 100	1.32	1.24	1.16	1.48	1.78	1.14	1.3	1.17	1.09	1.21	1.64	0.96	3.20357	High	0.002049	0.0391	38.31	High	0.0006063	1	S7(Phospho): 100	S7;	21361437	NP_055315.2	KDLDEEGsEKELHEN	Yes
GEMIN5	25929	gem-associated protein 5 isoform 1 [Homo sapiens]	S757	TPVKLEsIDGNEEESMK	157739942	3×TMT6plex [N-Term; K4; K17]; 1×Phospho [S7(100)]	157739942 1×Phospho [S757(100)]	0.0678525	0.00324934	1	2	2	356461016; 157739942	157739942 [751-767]	1	2673.37	S7(Phospho): 100	1.05	0.87	1.17	2.17	1.21	1.18							2.75791	High	0.0007749	0.01196	1.79	High	0.0007817	1	S7(Phospho): 100	S7;	157739942	NP_056280.2	RTPVKLEsIDGNEEE	Yes
TMPO	7112	thymopoietin isoform alpha [Homo sapiens]	S351	SHISDQsPLSSK	4507555	2×TMT6plex [N-Term; K12]; 1×Phospho [S7(100)]	4507555 1×Phospho [S351(100)]	0.000193713	0.00012481	1	1	6	4507555	4507555 [345-356]	0	1823.93	S7(Phospho): 100	1.03	0.66	1.37	1.15	1.75	1.44	1.69	1.87	1.93	1.59	2.57	1.97	4.85194	High	2.03e-05	7.68e-05	33.47	High	6.51e-05	1	S7(Phospho): 100	S7;	4507555	NP_003267.1	RSHISDQsPLSSKRK	Yes
SCAF11	9169	protein SCAF11 [Homo sapiens]	S608	TEELIEsPKLESSEGEIIQTVDR	117676384	2×TMT6plex [N-Term; K9]; 1×Phospho [S7(100)]	117676384 1×Phospho [S608(100)]	5.94e-05	6.55e-05	1	1	9	117676384	117676384 [602-624]	1	3140.6	S7(Phospho): 100	0.77	0.56	0.95	2.25	1.81	1.13	0.94	0.99	1.19	2.08	1.88	1.18	6.80298	High	1.3e-05	2.63e-05	11.06	High	0.0001301	1	S7(Phospho): 100	S7;	117676384	NP_004710.2	KTEELIEsPKLESSE	Yes
HTATSF1	27336	HIV Tat-specific factor 1 [Homo sapiens]	S702	LFEDDDsNEKLFDEEEDSSEK	21361437	3×TMT6plex [N-Term; K10; K21]; 1×Phospho [S7(100)]	21361437 1×Phospho [S702(100)]	0.000108478	9e-05	1	1	6	21361437	21361437 [696-716]	1	3287.5	S7(Phospho): 100	0.76	0.7	1.09	1.46	1.78	1.32	0.85	0.86	1.09	1.24	1.4	1.03	5.76551	High	2.03e-05	4.01e-05	29.32	High	7.92e-05	1	S7(Phospho): 100	S7;	21361437	NP_055315.2	KLFEDDDsNEKLFDE	Yes
ENAH	55740	protein enabled homolog isoform a [Homo sapiens]	S506	TNTMNGsKSPVISR	56549694	2×TMT6plex [N-Term; K8]; 2×Deamidated [N2; N5]; 1×Phospho [S7(100)]	56549694 1×Phospho [S506(100)]	0.106164	0.00509619	1	1	2	56549694	56549694 [500-513]	1	2032.02	S7(Phospho): 97.74	1	0.82	1.18	1.19	2.88	1.36	1.12	0.88	1.19	1.4	2.62	1.34	2.94403	High	0.001141	0.01996					S7(Phospho): 97.74	S7;	56549694	NP_001008493.1	RTNTMNGsKSPVISR	Yes
DOCK5	80005	dedicator of cytokinesis protein 5 [Homo sapiens]	S1780; S1789	LSPFHGsSPPQSTPLsPPPLTPK	117553586	2×TMT6plex [N-Term; K23]; 2×Phospho [S7(98.8); S/T]	117553586 2×Phospho [S1780(98.8); S/T]	0.00124152	0.000214298	1	1	6	117553586	117553586 [1774-1796]	0	2987.51	S7(Phospho): 97.96; S16(Phospho): 99.91	0.81	0.97	1.25	2.25	1.26	1.43	1.06	1.5	1.1	1.54	1.19	1.25	4.11654	High	7.41e-05	0.000412	27.36	High	0.0001716	1	S7(Phospho): 97.96; S16(Phospho): 99.91	S7; S16;	117553586	NP_079216.4	RLSPFHGsSPPQSTP;PPQSTPLsPPPLTPK	No;Yes
TWF1	5756	twinfilin-1 isoform 1 [Homo sapiens]	S143	YLLSQSsPAPLTAAEEELR	334848198	1×TMT6plex [N-Term]; 1×Phospho [S7(98.6)]	334848198 1×Phospho [S143(98.6)]	0.000190939	0.00012481	1	2	4	334724463; 334848198	334848198 [137-155]	0	2384.19	S7(Phospho): 98.57	1.16	0.92	1.07	1.31	0.66	2.06							3.70903	High	2.03e-05	7.95e-05	28.79	High	6.51e-05	1	S7(Phospho): 98.57	S7;	334848198	NP_001229326.1	KYLLSQSsPAPLTAA	Yes
ZFYVE26	23503	zinc finger FYVE domain-containing protein 26 [Homo sapiens]	S615	SPSGLRsPSESPQHIAHPER	38202205	1×TMT6plex [N-Term]; 1×Phospho [S7(98.9)]	38202205 1×Phospho [S615(98.9)]	0.000139891	9e-05	1	1	7	38202205	38202205 [609-628]	1	2478.21	S7(Phospho): 98.9	0.97	1.1	0.95	2.5	1.18	1.36	1.12	1.66	0.97	1.02	0.8	1.03	6.08339	High	2.03e-05	4.84e-05	18.47	High	6.51e-05	1	S7(Phospho): 98.9	S7;	38202205	NP_056161.2	KSPSGLRsPSESPQH	Yes
ACACA	31	acetyl-CoA carboxylase 1 isoform 1 [Homo sapiens]	S62; S66	FIIGSVsEDNsEDEISNLVK	38679960	2×TMT6plex [N-Term; K20]; 2×Phospho [S7(100); S11(100)]	38679960 2×Phospho [S62(100); S66(100)]	0.000301845	0.000147488	1	2	4	38679977; 38679960	38679960 [56-75]	0	2813.33	S7(Phospho): 99.97; S11(Phospho): 100	1.37	1.14	1.71	1.32	1.61	1.3							3.99945	High	2.03e-05	9.32e-05	51.03	High	7.92e-05	1	S7(Phospho): 99.97; S11(Phospho): 100	S7; S11;	38679960	NP_942131.1	RFIIGSVsEDNSEDE;GSVSEDNsEDEISNL	No;No
TNS1	7145	tensin-1 isoform 1 [Homo sapiens]	S1269	VATTPGsPSLGR	66529407	1×TMT6plex [N-Term]; 1×Phospho [S7(100)]	66529407 1×Phospho [S1269(100)]	0.0122504	0.000778694	1	3	4	808688341; 66529407; 808688339	66529407 [1263-1274]	0	1451.75	S7(Phospho): 99.98	1.96	1.29	1.38	1.39	0.95	1.42	2.13	1.25	1.38	1.69	1.34	1.45	3.19497	High	0.0002163	0.002223	24.1	High	0.0002024	1	S7(Phospho): 99.98	S7;	66529407	NP_072174.3	KVATTPGsPSLGRHP	Yes
SH3KBP1	30011	SH3 domain-containing kinase-binding protein 1 isoform a [Homo sapiens]	S183	ETTGSEsDGGDSSSTK	13994242	2×TMT6plex [N-Term; K16]; 1×Phospho [S7(100)]	13994242 1×Phospho [S183(100)]	0.000146753	9e-05	1	2	18	67514036; 13994242	13994242 [177-192]	0	2082.91	S7(Phospho): 99.99	1.52	1.13	1.49	1.91	1.04	2.36	1.72	1.55	1.32	1.74	1.14	2.89	4.98923	High	2.03e-05	5.03e-05	56.34	High	5.72e-05	1	S7(Phospho): 99.99	S7;	13994242	NP_114098.1	RETTGSEsDGGDSSS	Yes
MCM6	4175	DNA replication licensing factor MCM6 [Homo sapiens]	S762	EIESEIDsEEELINK	7427519	2×TMT6plex [N-Term; K15]; 1×Phospho [S8(100)]	7427519 1×Phospho [S762(100)]	0.000947961	0.000214298	1	1	14	7427519	7427519 [755-769]	0	2315.13	S8(Phospho): 100	2.14	1.59	1.09	1.21	0.95	0.85	2.17	1.21	1.03	1.17	0.93	0.91	4.29561	High	6.84e-05	0.000277	47.64	High	8.36e-05	1	S8(Phospho): 100	S8;	7427519	NP_005906.2	EIESEIDsEEELINK	Yes
BNIP3	664	BCL2/adenovirus E1B 19 kDa protein-interacting protein 3 [Homo sapiens]	S151	ASETDTHsIGEK	734703979	2×TMT6plex [N-Term; K12]; 1×Phospho [S8(100)]	734703979 1×Phospho [S151(100)]	0.000545437	0.000193352	1	1	6	734703979	734703979 [144-155]	0	1812.88	S8(Phospho): 100	1.82	4.44	1.2	1.09	0.72	1.05							4.43801	High	5.25e-05	0.0001496	25.51	High	8.36e-05	1	S8(Phospho): 100	S8;	734703979	NP_004043.3	ASETDTHsIGEKNSS	No
CAP2	10486	adenylyl cyclase-associated protein 2 [Homo sapiens]	S301	AQGGQTQsPTK	5453593	2×TMT6plex [N-Term; K11]; 1×Deamidated [Q]; 1×Phospho [S8(100)]	5453593 1×Phospho [S301(100)]	0.000231888	0.000147488	1	1	12	5453593	5453593 [294-304]	0	1641.82	S8(Phospho): 100	1.77	2.12	0.91	0.72	0.89	0.87	2.62	3.18	1.55	0.95	1.01	1.31	4.70854	High	2.03e-05	7.4e-05	41.09	High	6.51e-05	1	S8(Phospho): 100	S8;	5453593	NP_006357.1	AQGGQTQsPTKSHTP	Yes
SCLY	51540	selenocysteine lyase [Homo sapiens]	S137	GHTGGHHsPVK	323668300	2×TMT6plex [N-Term; K11]; 1×Phospho [S8(100)]	323668300 1×Phospho [S137(100)]	0.000435037	0.000193352	1	1	12	323668300	323668300 [130-140]	0	1651.85	S8(Phospho): 100	1.67	1.08	2.24	1.05	1.93	1.3	1.89	0.92	2.8	1.3	2.74	2.27	4.73316	High	7.18e-05	0.000329	27.2	High	0.0001196	1	S8(Phospho): 100	S8;	323668300	NP_057594.4	GHTGGHHsPVKGAKP	No
AFAP1	60312	actin filament-associated protein 1 isoform A [Homo sapiens]	S752	SGTSSPQsPVFR	197382472	1×TMT6plex [N-Term]; 1×Phospho [S8(100)]	197382472 1×Phospho [S752(100)]	0.00597736	0.000478316	1	2	8	40807504; 197382472	197382472 [745-756]	0	1558.75	S8(Phospho): 100	1.55	2.38	1.51	1.43	1.24	1.93	1.42	2.25	1.51	1.62	1.34	2.84	3.35843	High	0.0002849	0.003073	26.86	High	0.0001929	1	S8(Phospho): 100	S8;	197382472	NP_001128119.1	SGTSSPQsPVFRHRT	No
TBC1D10B	26000	TBC1 domain family member 10B [Homo sapiens]	S22	HGAPAAPsPPPR	167614488	1×TMT6plex [N-Term]; 1×Phospho [S8(100)]	167614488 1×Phospho [S22(100)]	0.000217427	0.000147488	1	1	4	167614488	167614488 [15-26]	0	1463.74	S8(Phospho): 100	1.36	1.39	1.72	1.51	1.61	2.25	1.48	1.87	1.15	0.92	0.89	1.01	3.70477	High	2.03e-05	6.99e-05	16.69	High	7.92e-05	1	S8(Phospho): 100	S8;	167614488	NP_056342.3	HGAPAAPsPPPRGSR	Yes
RIC8A	60626	synembryn-A isoform 1 [Homo sapiens]	S508	VIQPMGMsPR	27883866	1×TMT6plex [N-Term]; 1×Phospho [S8(100)]	27883866 1×Phospho [S508(100)]	0.18865	0.00993198	1	2	2	27883866; 554790401	27883866 [501-510]	0	1424.7	S8(Phospho): 100	1.33	2.14	1.34	0.96	1.12	0.98							2.94681	High	0.003567	0.07149	23.69	High	0.002245	1	S8(Phospho): 100	S8;	27883866	NP_068751.4	VIQPMGMsPRGHLTS	No
SHCBP1	79801	SHC SH2 domain-binding protein 1 [Homo sapiens]	S273	SSLSNCNsDSEQENISMVEGLK	190358504	2×TMT6plex [N-Term; K22]; 1×Carbamidomethyl [C6]; 1×Phospho [S8(100)]	190358504 1×Phospho [S273(100)]	8.27e-05	9e-05	1	1	4	190358504	190358504 [266-287]	0	2966.35	S8(Phospho): 100	1.29	1.08	1.32	0.83	1.12	1.28	1.67	1.51	1.7	1.44	1.8	1.68	5.31013	High	2.03e-05	3.35e-05	52.89	High	2.27e-05	1	S8(Phospho): 100	S8;	190358504	NP_079021.3	SSLSNCNsDSEQENI	Yes
WAC	51322	WW domain-containing adapter protein with coiled-coil isoform 1 [Homo sapiens]	S511	QQGHEPVsPR	18379328	1×TMT6plex [N-Term]; 1×Phospho [S8(100)]	18379328 1×Phospho [S511(100)]	0.000989613	0.000214298	1	3	16	18379328; 18379332; 18379330	18379328 [504-513]	0	1443.69	S8(Phospho): 100	1.22	2.14	0.84	0.94	1.13	0.98	1.68	1.73	1.38	0.99	1.57	0.96	3.77647	High	0.0001488	0.00121	31.99	High	0.0001929	1	S8(Phospho): 100	S8;	18379328	NP_057712.2	QQGHEPVsPRSLQRS	Yes
FOXL2	668	forkhead box protein L2 [Homo sapiens]	S33	EPEGPPPsPGK	12751477	2×TMT6plex [N-Term; K11]; 1×Phospho [S8(100)]	12751477 1×Phospho [S33(100)]	0.000338546	0.000147488	1	1	8	12751477	12751477 [26-36]	0	1629.83	S8(Phospho): 100	1.04	1.55	1.02	1.18	1.38	1.08	1.01	1.61	0.93	1.04	1.34	0.98	4.33518	High	2.62e-05	0.0001027	37.94	High	7.11e-05	1	S8(Phospho): 100	S8;	12751477	NP_075555.1	EPEGPPPsPGKGGGG	Yes
PTPN13	5783	tyrosine-protein phosphatase non-receptor type 13 isoform 4 [Homo sapiens]	S1033	SVASLNRsPER	18375650	1×TMT6plex [N-Term]; 1×Phospho [S8(100)]	18375650 1×Phospho [S1033(100)]	0.123481	0.00629931	1	3	2	18375650; 18375646; 5453992	18375650 [1026-1036]	1	1524.77	S8(Phospho): 100	1.01	1.25	1.71	1.51	2.1	1.16							2.75572	High	0.00134	0.02376	2.65	High	0.00202	1	S8(Phospho): 100	S8;	18375650	NP_542416.1	SVASLNRsPERRKHE	Yes
DHX16	8449	putative pre-mRNA-splicing factor ATP-dependent RNA helicase DHX16 isoform 1 [Homo sapiens]	S160	QQTEKPEsEDEWER	255982614	2×TMT6plex [N-Term; K5]; 1×Phospho [S8(100)]	255982614 1×Phospho [S160(100)]	0.00195934	0.000261096	1	2	12	256000749; 255982614	255982614 [153-166]	0	2329.07	S8(Phospho): 100	0.9	0.93	1.01	1	1.03	0.81	1.26	1.19	1.32	2	1.83	1.81	3.57479	High	0.0005952	0.008364	31.45	High	0.0001196	1	S8(Phospho): 100	S8;	255982614	NP_003578.2	QQTEKPEsEDEWERT	Yes
PALMD	54873	palmdelphin [Homo sapiens]	S515	EQEESLGsPVHHSPFDAQTTGDGTEDPSLTALR	8923243	1×TMT6plex [N-Term]; 1×Phospho [S8(100)]	8923243 1×Phospho [S515(100)]	4.27e-05	6.55e-05	1	1	4	8923243	8923243 [508-540]	0	3817.74	S8(Phospho): 100	0.87	1.28	1.02	1.51	2.11	0.74							7.55458	High	0	1.41e-05	49.07	High	1.91e-05	1	S8(Phospho): 100	S8;	8923243	NP_060204.1	EQEESLGsPVHHSPF	Yes
TPT1	7178	translationally-controlled tumor protein isoform 1 [Homo sapiens]	S46	TEGNIDDsLIGGNASAEGPEGEGTESTVITGVDIVMNHHLQETSFTK	555943903	2×TMT6plex [N-Term; K47]; 1×Deamidated [N/Q]; 1×Phospho [S8(100)]	555943903 1×Phospho [S46(100)]	6.41e-05	6.55e-05	1	3	9	555943903; 555943820; 4507669	555943903 [39-85]	0	5396.54	S8(Phospho): 100	0.81	1.38	1.32	1.26	1.05	2.39							6.01933	High	2.03e-05	3.27e-05	37.5	High	6.51e-05	1	S8(Phospho): 100	S8;	555943903	NP_001273201.1	TEGNIDDsLIGGNAS	Yes
KIAA1522	57648	uncharacterized protein KIAA1522 isoform 1 [Homo sapiens]	S604	GLAGPPAsPGK	112734870	2×TMT6plex [N-Term; K11]; 1×Phospho [S8(100)]	112734870 1×Phospho [S604(100)]	0.000707074	0.000193352	1	2	22	312176416; 112734870	112734870 [597-607]	0	1489.82	S8(Phospho): 100	0.68	0.94	1.03	0.69	2.11	0.62	0.67	0.77	0.93	0.55	1.81	0.58	3.9662	High	0.0001488	0.001215	50.83	High	0.0001068	1	S8(Phospho): 100	S8;	112734870	NP_065939.2	GLAGPPAsPGKAQPP	No
PDE4D	5144	cAMP-specific 3',5'-cyclic phosphodiesterase 4D isoform PDE4D4 [Homo sapiens]	S202	SDSDYDLsPK	157277988	2×TMT6plex [N-Term; K10]; 1×Phospho [S8(100)]	157277988 1×Phospho [S202(100)]	0.00867665	0.00064256	1	10	7	308387380; 259906420; 308387376; 661903030; 661903028; 308387374; 32171241; 32306513; 82799484; 157277988	157277988 [195-204]	0	1664.78	S8(Phospho): 100	0.58	0.57	0.61	1.11	1.28	0.71	0.66	0.78	0.66	1.12	1.44	0.71	3.82266	High	0.0001764	0.001449	23.41	High	0.002434	1	S8(Phospho): 100	S8;	157277988	NP_001098101.1	SDSDYDLsPKSMSRN	Yes
NCOR2	9612	nuclear receptor corepressor 2 isoform 1 [Homo sapiens]	S2044; S2054	SLGYHGSsYSPEGVEPVsPVSSPSLTHDK	331284178	2×TMT6plex [N-Term; K29]; 2×Phospho [S8(95.5); S18(100)]	331284178 2×Phospho [S2044(95.5); S2054(100)]	4.32e-05	6.55e-05	1	3	9	331284176; 331284180; 331284178	331284178 [2037-2065]	0	3618.68	S8(Phospho): 95.53; S18(Phospho): 100	1.71	1.71	1.36	1.87	1.78	1.68	1.63	1.33	1.46	1.74	1.59	1.64	7.76207	High	0	1.76e-05	32.03	High	2.27e-05	1	S8(Phospho): 95.53; S18(Phospho): 100	S8; S18;	331284178	NP_006303.4	SLGYHGSsYSPEGVE;PEGVEPVsPVSSPSL	No;No
FAS	355	tumor necrosis factor receptor superfamily member 6 isoform 1 precursor [Homo sapiens]	S212	ENQGSHEsPTLNPETVAINLSDVDLSK	4507583	2×TMT6plex [N-Term; K27]; 1×Phospho [S8(100)]	4507583 1×Phospho [S212(100)]	4.82e-05	6.55e-05	1	2	16	23510421; 4507583	4507583 [205-231]	0	3432.69	S8(Phospho): 97.99	0.82	0.54	1.11	2.49	1.1	1.07	0.54	0.39	0.74	1.61	0.69	0.69	5.92423	High	1.3e-05	2.25e-05	32.15	High	2.27e-05	1	S8(Phospho): 97.99	S8;	4507583	NP_000034.1	ENQGSHEsPTLNPET	Yes
RRP1B	23076	ribosomal RNA processing protein 1 homolog B [Homo sapiens]	S735; S736	TPTSSPAssPLVAK	57863269	2×TMT6plex [N-Term; K14]; 2×Phospho [S8(98.6); S9(98.6)]	57863269 2×Phospho [S735(98.6); S736(98.6)]	0.0204356	0.0012448	1	1	5	57863269	57863269 [728-741]	0	1960.98	S8(Phospho): 98.62; S9(Phospho): 98.62	1.29	1.37	1.91	1.54	1.8	1.53							3.28077	High	0.0003287	0.003788	15.55	High	0.0004087	1	S8(Phospho): 98.62; S9(Phospho): 98.62	S8; S9;	57863269	NP_055871.1	TPTSSPAsSPLVAKK;PTSSPASsPLVAKKP	Yes;Yes
ITSN2	50618	intersectin-2 isoform 1 [Homo sapiens]	S889	TVSPGSVsPIHGQGQVVENLK	194294521	2×TMT6plex [N-Term; K21]; 1×Phospho [S8(99)]	194294521 1×Phospho [S889(99)]	4.6e-05	6.55e-05	1	3	17	194294525; 194294521; 194294523	194294521 [882-902]	0	2671.42	S8(Phospho): 99	0.92	0.68	0.99	2.22	1.51	1.21	0.91	0.77	0.88	1.61	1.36	1.06	8.47638	High	1.3e-05	2.04e-05	54.87	High	2.27e-05	1	S8(Phospho): 99	S8;	194294521	NP_006268.2	TVSPGSVsPIHGQGQ	Yes
AFAP1	60312	actin filament-associated protein 1 isoform A [Homo sapiens]	S795	SQAAPGSsPCR	197382472	1×TMT6plex [N-Term]; 1×Carbamidomethyl [C10]; 1×Phospho [S8(99.1)]	197382472 1×Phospho [S795(99.1)]	0.00530989	0.000453644	1	2	3	40807504; 197382472	197382472 [788-798]	0	1426.63	S8(Phospho): 99.09	0.91	1.5	1.18	0.58	0.79	2.02							2.48553	High	0.0009469	0.01617	31.17	High	0.0001716	1	S8(Phospho): 99.09	S8;	197382472	NP_001128119.1	SQAAPGSsPCRGHVL	No
NOP2	4839	probable 28S rRNA (cytosine(4447)-C(5))-methyltransferase isoform 3 [Homo sapiens]	S819	GPQPPTVsPIR	385198061	1×TMT6plex [N-Term]; 1×Phospho [S8(100)]	385198061 1×Phospho [S819(100)]	0.000409373	0.000193352	1	3	24	76150623; 385198059; 385198061	385198061 [812-822]	0	1457.77	S8(Phospho): 99.43	2.13	1.65	1.3	1.18	1.62	1.33	1.94	1.57	1.56	1.22	1.64	1.3	3.61313	High	9.7e-05	0.0004676	39.47	High	7.92e-05	1	S8(Phospho): 99.43	S8;	385198061	NP_001245238.1	GPQPPTVsPIRSSRP	No
RANBP2	5903	E3 SUMO-protein ligase RanBP2 [Homo sapiens]	S1160	NHETDGGsAHGDDDDDGPHFEPVVPLPDK	150418007	2×TMT6plex [N-Term; K29]; 1×Phospho [S8(100)]	150418007 1×Phospho [S1160(100)]	5.2e-05	6.55e-05	1	1	15	150418007	150418007 [1153-1181]	0	3607.6	S8(Phospho): 99.96	1.07	0.87	1.52	1.67	2.01	1.72	1.21	0.99	1.71	1.41	1.68	1.73	8.74658	High	1.3e-05	2.34e-05	44.27	High	7.92e-05	1	S8(Phospho): 99.96	S8;	150418007	NP_006258.3	NHETDGGsAHGDDDD	Yes
RBMS1	5937	RNA-binding motif, single-stranded-interacting protein 1 isoform a [Homo sapiens]	S112	GYGFVDFDsPAAAQK	8400718	2×TMT6plex [N-Term; K15]; 1×Phospho [S9(100)]	8400718 1×Phospho [S112(100)]	0.000489099	0.000193352	1	7	6	4506447; 295148142; 8400718; 295148139; 51317355; 51317353; 51317351	8400718 [104-118]	0	2111.03	S9(Phospho): 100	1.8	1.77	1.7	1.04	1.87	1.17	1.75	1.37	1.66	1.22	1.37	1.27	4.00652	High	5.25e-05	0.0001378	36.58	High	8.36e-05	1	S9(Phospho): 100	S9;	8400718	NP_058520.1	YGFVDFDsPAAAQKA	Yes
U2SURP	23350	U2 snRNP-associated SURP motif-containing protein [Homo sapiens]	S485	LYSILQGDsPTK	122937227	2×TMT6plex [N-Term; K12]; 1×Phospho [S9(100)]	122937227 1×Phospho [S485(100)]	0.0026364	0.00034134	1	1	3	122937227	122937227 [477-488]	0	1859.99	S9(Phospho): 100	1.29	1.76	1.62	1.51	2.25	1.98							2.55195	High	0.0002091	0.002085	26.43	High	0.0001264	1	S9(Phospho): 100	S9;	122937227	NP_001073884.1	YSILQGDsPTKWRTE	Yes
DDX21	9188	nucleolar RNA helicase 2 isoform 1 [Homo sapiens]	S89	EEPSQNDIsPK	50659095	2×TMT6plex [N-Term; K11]; 2×Deamidated [Q5; N6]; 1×Phospho [S9(100)]	50659095 1×Phospho [S89(100)]	0.0792689	0.00362738	1	2	2	50659095; 379317177	50659095 [81-91]	0	1783.84	S9(Phospho): 100	1.26	1.23	1.39	0.8	1.68	1.41							2.38498	High	0.001713	0.03132	27.34	High	0.0008575	1	S9(Phospho): 100	S9;	50659095	NP_004719.2	EPSQNDIsPKTKSLR	Yes
CEP170	9859	centrosomal protein of 170 kDa isoform alpha [Homo sapiens]	S1529	SSPVNNHHsPGQTPTLGQPEAR	109255228	1×TMT6plex [N-Term]; 1×Phospho [S9(100)]	109255228 1×Phospho [S1529(100)]	0.000147504	9e-05	1	3	4	109255228; 109255230; 109255232	109255228 [1521-1542]	0	2620.25	S9(Phospho): 100	1.16	1.92	1.75	1.26	0.98	3.11	0.81	1.35	1.31	0.78	0.66	2.23	4.94408	High	2.03e-05	5.04e-05	42.13	High	3.2e-05	1	S9(Phospho): 100	S9;	109255228	NP_055627.2	SPVNNHHsPGQTPTL	Yes
[truncated: 10,107 more rows]

## Sheet: S3
Supplementary table S3 : List of phosphopeptides identified in bladder carcinoma cell lines using SequestHT and Mascot search algorithms with a PhosphoRS probablity of ≥75%
[truncated: 5,571 more rows]

[truncated: 6 more sheets: S4, S5, S6, S7, S8, S9]
